# Supplementary material for: Autophagy-related prognostic signature for survival prediction of triple negative breast cancer
Source: PeerJ journal article supplement (doi:10.7717/peerj.12878), 2022-02-09
Supplement: Raw_data.zip [file TCGA-BRCA.GDC_phenotype.xls]

submitter_id.samples	additional_pharmaceutical_therapy	additional_radiation_therapy	additional_surgery_locoregional_procedure	additional_surgery_metastatic_procedure	age_at_initial_pathologic_diagnosis	anatomic_neoplasm_subdivision	anatomic_treatment_site	axillary_lymph_node_stage_method_type	axillary_lymph_node_stage_other_method_descriptive_text	batch_number	bcr	bcr_drug_barcode	bcr_drug_uuid	bcr_followup_barcode	bcr_followup_uuid	bcr_radiation_barcode	bcr_radiation_uuid	breast_cancer_surgery_margin_status	breast_carcinoma_estrogen_receptor_status	breast_carcinoma_immunohistochemistry_er_pos_finding_scale	breast_carcinoma_immunohistochemistry_pos_cell_score	breast_carcinoma_immunohistochemistry_progesterone_receptor_pos_finding_scale	breast_carcinoma_primary_surgical_procedure_name	breast_carcinoma_progesterone_receptor_status	breast_carcinoma_surgical_procedure_name	breast_neoplasm_other_surgical_procedure_descriptive_text	clinical_trail_drug_classification	course_number	cytokeratin_immunohistochemistry_staining_method_micrometastasis_indicator	day_of_dcc_upload	day_of_form_completion	days_to_additional_surgery_locoregional_procedure	days_to_additional_surgery_metastatic_procedure	days_to_drug_therapy_end	days_to_drug_therapy_start	days_to_initial_pathologic_diagnosis	days_to_last_known_alive	days_to_new_tumor_event_additional_surgery_procedure	days_to_new_tumor_event_after_initial_treatment	days_to_radiation_therapy_end	days_to_radiation_therapy_start	distant_metastasis_present_ind2	drug_name	er_detection_method_text	er_level_cell_percentage_category	file_uuid	fluorescence_in_situ_hybridization_diagnostic_procedure_chromosome_17_signal_result_range	followup_case_report_form_submission_reason	her2_and_centromere_17_positive_finding_other_measurement_scale_text
TCGA-A8-A07F-01A					65	Left Upper Outer Quadrant	Primary Tumor Field			47.97.0	Nationwide Children's Hospital	TCGA-A8-A07F-D37886	68745060-A6F4-4638-9ADB-D798AA9BF1F7	TCGA-A8-A07F-F40826	820EEFC0-3A02-4112-A50A-CC0ABD447D83	TCGA-A8-A07F-R38189	9B5CFAA3-D092-43B8-9105-C1EDC216D232		Positive					Positive	Other					31	2				365	0				212	181		Tamoxifen			167517E0-234C-4CC2-BC71-B74B81F18D18
TCGA-A8-A081-01A					80	Right				47.97.0	Nationwide Children's Hospital								Positive					Positive	Other					31	27					0										54895207-BEBF-45BB-A3A4-BB29BBA86DC8
TCGA-A2-A25A-01A					44	Left Upper Inner Quadrant		Axillary lymph node dissection alone		147.75.0	Nationwide Children's Hospital	TCGA-A2-A25A-D14584	CDAB626B-3EFA-48B1-A671-C525E974334C	TCGA-A2-A25A-F30927	23DA0430-B849-4D44-91A7-3099F6931B76	TCGA-A2-A25A-R14586	E691C50B-1796-4283-817C-0F5231B1908D		Positive					Positive	Simple Mastectomy			1	YES	31	19					0						NO	Taxol		<10%	1EC5A93A-C8C5-41AA-BC7E-6359F315A473		Scheduled Follow-up Submission
TCGA-E2-A1B0-01A					50	Left Upper Outer Quadrant	Primary Tumor Field	Sentinel lymph node biopsy plus axillary dissection		96.78.0	Nationwide Children's Hospital	TCGA-E2-A1B0-D19480	B08E096E-EE65-42AA-B000-0198892EB17B	TCGA-E2-A1B0-F19460	14D44CAA-26DC-4B41-B2A0-DC4A8A58BED3	TCGA-E2-A1B0-R19461	07FCCE4F-84AC-4AC3-A6BE-A677BDAD8EF3		Negative					Negative	Modified Radical Mastectomy			1	NO	31	7			557	231	0				300	257	NO	herceptin	Allred score 0+0 = 0		92002377-880E-4642-BBA6-7882CA6C08C3		Scheduled Follow-up Submission
TCGA-LL-A6FQ-01A					77	Right Upper Outer Quadrant		Axillary lymph node dissection alone		322.49.0	Nationwide Children's Hospital			TCGA-LL-A6FQ-F58204	804405B3-E0C3-4F4D-985A-1AF09F39E17F				Positive	3 Point Scale	2+	3 Point Scale		Positive	Modified Radical Mastectomy				YES	31	2					0									90-99%	B9EAFBD0-B324-48C1-BC31-AD4D7B4481FD
TCGA-E2-A14Q-01A					50	Left Upper Outer Quadrant		Sentinel lymph node biopsy plus axillary dissection		93.85.0	Nationwide Children's Hospital	TCGA-E2-A14Q-D18801	38EC0589-8337-4CE8-B1F2-D4F29BB091A1	TCGA-E2-A14Q-F18800	D5D37217-A5A0-4F1E-A521-F1E6125491B4				Positive					Positive	Lumpectomy				NO	31	20				53	0						NO	Tamoxifen	Allred score 5+3 = 8		5CEC959D-DF9E-41BA-BCB5-9BFB307CD078		Scheduled Follow-up Submission
TCGA-E2-A573-01A					48	Right Upper Outer Quadrant	Primary Tumor Field	Sentinel node biopsy alone		305.50.0	Nationwide Children's Hospital	TCGA-E2-A573-D44502	3A195E08-569B-4623-BF02-4176DE92D98C	TCGA-E2-A573-F61338	E2709DF2-6524-4677-B518-338714E12666	TCGA-E2-A573-R44499	400B06FE-ADCF-4256-98CF-9BA8697DB36C		Negative					Negative	Other				NO	31	27			167	104	0				251	201		Cytoxan	Allred 0 = 0+0		434F9A56-4C53-4E2B-98C0-E04A43367B99	1.8
TCGA-AR-A24O-01A					43	Left	Primary Tumor Field			142.78.0	Nationwide Children's Hospital	TCGA-AR-A24O-D31367	342B68A1-E8FE-4380-A4A7-669B934A259E	TCGA-AR-A24O-F49492	93ABDAE4-8A54-4D8A-BA69-C7706A59F8D4	TCGA-AR-A24O-R31357	7319E2CD-94B7-467E-A60A-FF7EBEA36F2C	Negative	Positive				Mastectomy NOS	Positive	Modified Radical Mastectomy			1		31	2			1994	153	0			2561	218	174		Tamoxifen			F5C72EF4-91BF-43EE-9387-AD9D216CE51B		Scheduled Follow-up Submission
TCGA-E2-A1LA-01A					59	Right Upper Inner Quadrant		Sentinel lymph node biopsy plus axillary dissection		117.78.0	Nationwide Children's Hospital	TCGA-E2-A1LA-D20587	2BE8D472-4522-4803-AA13-CA72D38B9A45	TCGA-E2-A1LA-F20586	1E00479E-F37F-4BC0-8819-1EE4A5496823				Positive					Positive	Simple Mastectomy				NO	31	12				48	0						NO	Arimidex	allred score 5 + 3 = 8		4B9A4706-3037-40F3-BD57-6F3A61180987		Scheduled Follow-up Submission
TCGA-E9-A3QA-01A					33	Left Lower Inner Quadrant		Axillary lymph node dissection alone		227.60.0	Nationwide Children's Hospital			TCGA-E9-A3QA-F66100	32054674-B4A7-45C1-AF24-7707709AD516															31	2					0						NO				37C45C89-984B-45CA-8AC0-A6E890523E36
TCGA-BH-A0E6-01A					69	Left	Primary Tumor Field	Sentinel node biopsy alone		56.90.0	Nationwide Children's Hospital	TCGA-BH-A0E6-D4647	066B8D3A-D2FB-4BC0-B6C5-9D06F6529B73	TCGA-BH-A0E6-F4650	57382918-996B-4452-A6EC-6520C9719E12	TCGA-BH-A0E6-R4649	6D6BDE4C-3E32-4C6A-9BBA-B937678BBDE3								Other			1	NO	31	16			121	58	0				191	145		CYTOXAN			1AA2654E-962B-4EEE-A5AD-F9FE92CD6504
TCGA-BH-A1FH-01A					47	Left Upper Outer Quadrant				109.88.0	Nationwide Children's Hospital								Positive					Negative	Modified Radical Mastectomy					31	8					0						YES				C8D8600A-855F-4DD7-8435-BE8C35BAE755
TCGA-BH-A1FH-11B					47	Left Upper Outer Quadrant				109.88.0	Nationwide Children's Hospital								Positive					Negative	Modified Radical Mastectomy					31	8					0						YES				C8D8600A-855F-4DD7-8435-BE8C35BAE755
TCGA-AC-A2FM-01A	NO	NO			87	Right Upper Inner Quadrant		Sentinel node biopsy alone		185.69.0	Nationwide Children's Hospital			TCGA-AC-A2FM-F43237	B54C9682-B927-4790-A081-623844557F09										Modified Radical Mastectomy				YES	31	15					0			780			YES				A041E48A-0C9E-492B-BF78-3D051D07CDF1
TCGA-AC-A2FM-11B	NO	NO			87	Right Upper Inner Quadrant		Sentinel node biopsy alone		185.69.0	Nationwide Children's Hospital			TCGA-AC-A2FM-F43237	B54C9682-B927-4790-A081-623844557F09										Modified Radical Mastectomy				YES	31	15					0			780			YES				A041E48A-0C9E-492B-BF78-3D051D07CDF1
TCGA-C8-A133-01A					65	Right		Axillary lymph node dissection alone		93.85.0	Nationwide Children's Hospital								Positive					Positive	Modified Radical Mastectomy					31	15					0										23B36DAC-0263-4BA3-948D-B0D4B4867F0C
TCGA-A8-A083-01A					67	Left				47.97.0	Nationwide Children's Hospital								Positive					Positive	Other					31	27					0										586A8FF6-B12F-43E2-A2E5-67A8204BA3AB
TCGA-E2-A15T-01A					65	Left Upper Outer Quadrant		Sentinel node biopsy alone		85.85.0	Nationwide Children's Hospital	TCGA-E2-A15T-D19143	A71ADC96-7255-4D33-ABC9-4883E48C7DB3	TCGA-E2-A15T-F70019	686DF890-B124-45EE-95DB-3848AB3F3B73				Positive					Positive	Simple Mastectomy				NO	31	9				34	0						NO	Arimidex	Allred score 5+3 = 8		C0C341EC-59A1-451E-A0DA-BCB7C81B9C43		Scheduled Follow-up Submission
TCGA-B6-A3ZX-01A	YES	YES			50	Left Upper Inner Quadrant	Primary Tumor Field	Axillary lymph node dissection alone		239.55.0	Nationwide Children's Hospital	TCGA-B6-A3ZX-D40954	F6C3B0B8-B9E0-4962-BCCD-705214844D6F	TCGA-B6-A3ZX-F59573	2242BB2F-C23E-4005-94CA-3E9F32043C1C	TCGA-B6-A3ZX-R40955	5B8D0E18-6490-40BE-80EC-6AD12BC416FA	Negative	Negative	4 Point Scale	1+	4 Point Scale	Lumpectomy	Negative	Lumpectomy				NO	31	3			225	148	0		1096	994	386	354		Paclitaxel		<10%	F814C356-3EF9-45CF-BA01-3B36950B5868
TCGA-C8-A27B-01A					48	Left				142.78.0	Nationwide Children's Hospital	TCGA-C8-A27B-D70785	18D1F0D1-A458-40F2-B27C-6E5C94FED213	TCGA-C8-A27B-F70781	034E528F-AA4B-4323-B33B-521853E5E8E5				Negative					Negative	Modified Radical Mastectomy					31	9			85	62	0							Taxol			43C749E2-BCC5-4517-A1CB-59E39C0ADFA9
TCGA-E9-A24A-01A					69	Right Upper Outer Quadrant	Primary Tumor Field	Axillary lymph node dissection alone		142.78.0	Nationwide Children's Hospital	TCGA-E9-A24A-D31257	64424F2D-62A0-41E3-AC8A-8D4380E0149C	TCGA-E9-A24A-F39541	CE71B1A0-DB97-48A0-913F-05CD15EED1C9	TCGA-E9-A24A-R31258	048982EB-6799-422D-B7D8-045CE8B2D032											1	NO	31	24				9	0				65	35	NO	Tamoxifen			7288D9ED-2064-429A-A7E6-F12130C7D622		Scheduled Follow-up Submission
TCGA-EW-A1P3-01A					48	Right Lower Outer Quadrant		Other (specify)	SN+1 non sentinel node	117.78.0	Nationwide Children's Hospital	TCGA-EW-A1P3-D32282	0E200A24-933F-4B50-8382-45D54BFC5B59	TCGA-EW-A1P3-F41142	C361F496-F694-4201-844C-066F444499C3				Positive	3 Point Scale	3+	3 Point Scale		Positive	Simple Mastectomy				YES	31	12			233	167	0						NO	Paclitaxel		90-99%	DB2EC085-FF21-4D9B-953D-6964DF653D80		Scheduled Follow-up Submission
TCGA-AN-A0AT-01A					62	Right Upper Inner Quadrant		No axillary staging		56.90.0	Nationwide Children's Hospital			TCGA-AN-A0AT-F68948	6E5C0241-D8BE-4DB8-8893-0E939CCED8F6				Negative					Negative	Modified Radical Mastectomy				NO	31	23					0										5E3E65E9-6D84-4B3C-A515-35E20BEB2466
TCGA-E2-A10F-01A					47	Left Upper Outer Quadrant	Primary Tumor Field	Sentinel node biopsy alone		80.83.0	Nationwide Children's Hospital	TCGA-E2-A10F-D17872	3DE26760-A09A-4CD8-9EB1-5D20924A929A	TCGA-E2-A10F-F17187	30AF5AC3-356D-445F-AB37-B36BE75AE6EB	TCGA-E2-A10F-R7744	ddf6fed7-242c-4544-bb29-f2d335f2dcb7		Positive					Positive	Lumpectomy			1	NO	31	27			132	69	0				216	170		Docetaxel	Allred score 5+3=8		D8C867DE-9048-409F-9172-52CB71928407		Scheduled Follow-up Submission
TCGA-AR-A1AY-01A					65	Left Upper Outer Quadrant		Sentinel lymph node biopsy plus axillary dissection		96.78.0	Nationwide Children's Hospital	TCGA-AR-A1AY-D21982	4BBF53A3-33EC-452E-ABEB-55BC506B0EBD	TCGA-AR-A1AY-F49482	E5648A84-5439-451B-A1FB-234DA91B8F76	TCGA-AR-A1AY-R21978	D74AC1F9-01CC-47D6-8F12-D8FBADBC40A9		Negative					Negative	Other			1	YES	31	2			117		0				208			Cytoxan			368D08EB-1F66-4002-8F37-2175EC72D54F		Scheduled Follow-up Submission
TCGA-BH-A0B3-01A					53	Right	Primary Tumor Field	Sentinel lymph node biopsy plus axillary dissection		61.88.0	Nationwide Children's Hospital	TCGA-BH-A0B3-D15419	49AB6F59-1B1E-4B04-914E-82339768A10C	TCGA-BH-A0B3-F15418	493B0584-FAA6-475F-97F9-CFE0524DF460	TCGA-BH-A0B3-R15422	F9F1D8C1-B2FA-4516-B98F-D50ACCB6C8C6		Negative		0			Negative	Other			1	NO	31	3			115	52	0				72	24		Doxorubicin			F474658F-ADCC-4BFE-B6A0-7F4FA611EBC7		Scheduled Follow-up Submission
TCGA-BH-A0B3-11B					53	Right	Primary Tumor Field	Sentinel lymph node biopsy plus axillary dissection		61.88.0	Nationwide Children's Hospital	TCGA-BH-A0B3-D15419	49AB6F59-1B1E-4B04-914E-82339768A10C	TCGA-BH-A0B3-F15418	493B0584-FAA6-475F-97F9-CFE0524DF460	TCGA-BH-A0B3-R15422	F9F1D8C1-B2FA-4516-B98F-D50ACCB6C8C6		Negative		0			Negative	Other			1	NO	31	3			115	52	0				72	24		Doxorubicin			F474658F-ADCC-4BFE-B6A0-7F4FA611EBC7		Scheduled Follow-up Submission
TCGA-AR-A250-01A					58	Left Upper Outer Quadrant		Sentinel lymph node biopsy plus axillary dissection		142.78.0	Nationwide Children's Hospital	TCGA-AR-A250-D31682	90EABCF1-AA20-4EB3-B2A9-B65F7B1C21F3	TCGA-AR-A250-F49508	6501DF95-37C6-4C3A-952A-F585726826C1			Negative	Positive				Mastectomy NOS	Negative	Other					31	2				194	0							Anastrozole		70-79%	9F1B24DB-4D7B-4DA1-B1F9-28B6B63CEE6C
TCGA-AC-A3TM-01A					50	Right	Primary Tumor Field	Sentinel node biopsy alone		227.60.0	Nationwide Children's Hospital	TCGA-AC-A3TM-D60198	B38B327E-F854-4338-B383-77104EC6F403	TCGA-AC-A3TM-F60193	56C9B648-1452-4AC4-BD75-E1EF3F85A933	TCGA-AC-A3TM-R60194	CF6D6ED8-625C-463C-9639-3609DC5BB383		Positive					Positive	Simple Mastectomy				YES	31	31				272	0				266	219	NO	Arimidex		90-99%	7A02097D-E5D6-43DD-B08C-B6FD1F396523	1.9
TCGA-D8-A1XW-01A					53	Left Upper Inner Quadrant		Sentinel lymph node biopsy plus axillary dissection		124.80.0	Nationwide Children's Hospital	TCGA-D8-A1XW-D29460	DBD8AFC3-3C19-4ED7-A10C-F38A65FC6B47	TCGA-D8-A1XW-F72205	46CA0608-FFCA-4EEC-AA1E-7739ADCAD4C2				Negative					Positive	Modified Radical Mastectomy				NO	31	29			181	76	0						NO	adriamycin+cyclophosphamide	% IHC		1AE63263-7559-4807-997D-7A5AA3833565		Scheduled Follow-up Submission
TCGA-D8-A147-01A					45	Right Lower Outer Quadrant	Primary Tumor Field	Sentinel node biopsy alone		85.85.0	Nationwide Children's Hospital	TCGA-D8-A147-D64913	063BD28B-E3D7-44D7-BEA3-38407B9852F0	TCGA-D8-A147-F20737	6B778912-AC2E-4C50-A3F5-4D28049BE764	TCGA-D8-A147-R20739	C093FF02-9F16-4B3D-89AA-4760FC8CA1DC		Negative					Negative	Lumpectomy					31	14			135	21	0				223	188		docetaxel			978B25E0-DFF1-4B6B-BD1C-8942AF26C411		Scheduled Follow-up Submission
TCGA-BH-A8FZ-01A					58	Left	Primary Tumor Field			360.42.0	Nationwide Children's Hospital			TCGA-BH-A8FZ-F63679	11E8283A-157A-43A1-8DB4-8F21080D28C5	TCGA-BH-A8FZ-R57777	A3520120-DE20-49A6-A0A8-DC098E7076DC		Positive					Positive	Simple Mastectomy					31	27					0				125	81					3AFD9729-9FB8-4BB0-9C11-254562342A36
TCGA-E2-A14V-01A					53	Left Lower Inner Quadrant	Primary Tumor Field	Sentinel lymph node biopsy plus axillary dissection		93.85.0	Nationwide Children's Hospital	TCGA-E2-A14V-D18914	BB18FBCE-4921-4FD2-B7C0-CDA67CCD1AF5	TCGA-E2-A14V-F18870	FFA983CC-57D9-4557-B5BB-BCD3D09CB1CE	TCGA-E2-A14V-R18918	79735EF6-10DC-4DF6-B729-8C11B3A5D417		Positive	3 Point Scale		3 Point Scale		Positive	Lumpectomy			1	NO	31	4			468	118	0				303	253	NO	lapatinib			BF5DCB55-5F1C-4E5E-BBB0-BD8CD0E32B44		Scheduled Follow-up Submission
TCGA-D8-A1Y3-01A					61	Right Upper Outer Quadrant	Primary Tumor Field	Axillary lymph node dissection alone		136.76.0	Nationwide Children's Hospital	TCGA-D8-A1Y3-D30090	804ACAFF-8BBF-4830-B5D7-67949CD57F82	TCGA-D8-A1Y3-F30088	796131A4-3877-4190-8790-8A92DB48E978	TCGA-D8-A1Y3-R30091	A12F5CAC-72A2-430B-893C-10338084842F		Positive					Positive	Modified Radical Mastectomy					31	2			125	62	0				169	145	NO	doxorubicine+cyclophosphamide	manual counting		6FF791F7-19F4-454D-9738-4530797DB21C		Scheduled Follow-up Submission
TCGA-BH-A0HX-01A					54	Left		Sentinel lymph node biopsy plus axillary dissection		61.88.0	Nationwide Children's Hospital	TCGA-BH-A0HX-D4836	E0A73F7B-3621-4C44-B73F-4C6B1CEC05B8	TCGA-BH-A0HX-F4838	477758CF-349A-441F-B63C-93C9677D3415										Simple Mastectomy				YES	31	16					0							Taxotere			B3894BCE-D1B5-4D8C-B480-1E018E3F1CE2
TCGA-BH-A1EV-01A					45	Left	Regional site			103.78.0	Nationwide Children's Hospital			TCGA-BH-A1EV-F59154	6934F0BA-FA6D-4451-9935-E84F316DC61A	TCGA-BH-A1EV-R59156	70674749-BAAD-4C56-AA1E-92C3F0FB568C		Positive					Positive	Modified Radical Mastectomy					31	1					0				139	48					3D4BBF74-1AD0-441E-B422-4FE64413F495
TCGA-BH-A1EV-11A					45	Left	Regional site			103.78.0	Nationwide Children's Hospital			TCGA-BH-A1EV-F59154	6934F0BA-FA6D-4451-9935-E84F316DC61A	TCGA-BH-A1EV-R59156	70674749-BAAD-4C56-AA1E-92C3F0FB568C		Positive					Positive	Modified Radical Mastectomy					31	1					0				139	48					3D4BBF74-1AD0-441E-B422-4FE64413F495
TCGA-E9-A1RC-01A					56	Right Upper Outer Quadrant		Axillary lymph node dissection alone		136.76.0	Nationwide Children's Hospital	TCGA-E9-A1RC-D30609	62673F57-7FC4-4ED0-9E85-73C713C381A2	TCGA-E9-A1RC-F48701	0590580D-9303-4488-AA52-6C6FA55009EF										Modified Radical Mastectomy				NO	31	19			1222	1222	0						NO	Methotrexate			5FCDEDD2-B58F-4588-ADDB-72D2C8BC99B9		Scheduled Follow-up Submission
TCGA-E9-A1RC-11A					56	Right Upper Outer Quadrant		Axillary lymph node dissection alone		136.76.0	Nationwide Children's Hospital	TCGA-E9-A1RC-D30609	62673F57-7FC4-4ED0-9E85-73C713C381A2	TCGA-E9-A1RC-F48701	0590580D-9303-4488-AA52-6C6FA55009EF										Modified Radical Mastectomy				NO	31	19			1222	1222	0						NO	Methotrexate			5FCDEDD2-B58F-4588-ADDB-72D2C8BC99B9		Scheduled Follow-up Submission
TCGA-A8-A09R-01A					82	Left Lower Inner Quadrant	Primary Tumor Field			47.97.0	Nationwide Children's Hospital	TCGA-A8-A09R-D37768	E2A85158-819F-473B-AD84-8F5B443F5CCC	TCGA-A8-A09R-F40330	D44CD2FC-8E35-4FE5-94B7-1CF7C6BC3741	TCGA-A8-A09R-R38158	CF62E51D-F3FB-4825-A290-6BF63239AAD1		Positive					Positive	Other		n/a			31	17				0	0				120	61		Letrozole			F5A77347-1499-4598-954A-1F337C31B14A
TCGA-E9-A243-01A	YES	NO	YES		52	Right Upper Inner Quadrant	Regional site	Axillary lymph node dissection alone		142.78.0	Nationwide Children's Hospital	TCGA-E9-A243-D39523	617EAD96-72A4-41EE-B9EE-608F4B12E6DB	TCGA-E9-A243-F56656	92CEDE74-3DBC-4157-911C-633BA5EDB140	TCGA-E9-A243-R48750	DCC746D8-2A89-4B3A-8A8B-46ABCB5A9C2F								Lumpectomy				NO	31	18		305	520	305	0			305	151	119	NO	Pamidronate			5C46F15A-0691-4B9E-A23A-C6058041D5E0		Scheduled Follow-up Submission
TCGA-B6-A0RV-01A					42	Right		Axillary lymph node dissection alone		72.90.0	Nationwide Children's Hospital			TCGA-B6-A0RV-F13791	2950EE46-B267-4898-9ADF-B5B140CAD0A8				Positive					Positive	Modified Radical Mastectomy				NO	31	12					0								Image Analysis		0E845D7C-7AC6-43C1-9CD5-0C722291EB79		Scheduled Follow-up Submission
TCGA-AO-A03R-01A					57	Left	Regional site	Sentinel lymph node biopsy plus axillary dissection		56.90.0	Nationwide Children's Hospital	TCGA-AO-A03R-D2953	ef4485c7-bf90-4b7a-a8db-28bc351ea4be	TCGA-AO-A03R-F15469	BCD222CA-5847-43C0-8BEA-028A0E76FA81	TCGA-AO-A03R-R2949	cb083b63-0f8b-4518-86d5-8c2675da9503								Modified Radical Mastectomy			1	NO	31	22			109	67	0				245	200		DOXORUBICIN			B37E40EF-8235-43CD-B6A5-0EF1A39FC2BF		Scheduled Follow-up Submission
TCGA-BH-A0DH-01A					63	Left	Primary Tumor Field	Axillary lymph node dissection alone		72.90.0	Nationwide Children's Hospital	TCGA-BH-A0DH-D4522	60D7BF55-6327-457F-973E-6A5BF4E8FDC3	TCGA-BH-A0DH-F4529	03118CCF-5575-4CB5-840E-2DE55AA5F8FA	TCGA-BH-A0DH-R4527	7A76D067-B17D-48A7-8210-123A89951ED4	Negative					Mastectomy NOS		Other			1	NO	31	16			143	71	0				233	189		DOXORUBICIN			3B5846A4-2CBF-4430-804E-A701C8B2B8D6
TCGA-BH-A0DH-11A					63	Left	Primary Tumor Field	Axillary lymph node dissection alone		72.90.0	Nationwide Children's Hospital	TCGA-BH-A0DH-D4522	60D7BF55-6327-457F-973E-6A5BF4E8FDC3	TCGA-BH-A0DH-F4529	03118CCF-5575-4CB5-840E-2DE55AA5F8FA	TCGA-BH-A0DH-R4527	7A76D067-B17D-48A7-8210-123A89951ED4	Negative					Mastectomy NOS		Other			1	NO	31	16			143	71	0				233	189		DOXORUBICIN			3B5846A4-2CBF-4430-804E-A701C8B2B8D6
TCGA-D8-A1XY-01A					74	Left Upper Outer Quadrant		Axillary lymph node dissection alone		124.80.0	Nationwide Children's Hospital	TCGA-D8-A1XY-D29995	4983452A-0399-4CBE-BCDF-9F09A21FC698	TCGA-D8-A1XY-F29994	85C03FE0-C6F1-4428-A4D2-749634FC006D				Positive					Positive	Simple Mastectomy					31	31				421	0						NO	Tamoxifen	manual counting		5999EE70-FD70-4F73-B80F-6C374AA0448D		Scheduled Follow-up Submission
TCGA-AN-A03X-01A					74	Left Upper Outer Quadrant		No axillary staging		47.97.0	Nationwide Children's Hospital			TCGA-AN-A03X-F68976	469F1ACF-B8FD-4F11-9FE1-D2DBA8D25947				Positive					Positive	Modified Radical Mastectomy				NO	31	24					0										72562B93-DF86-47A7-8FC5-07F4C0726635
TCGA-E9-A1R3-01A					70	Right Upper Outer Quadrant	Regional site	Axillary lymph node dissection alone		124.80.0	Nationwide Children's Hospital	TCGA-E9-A1R3-D30826	63FBD160-E49D-4A37-ADC7-7BF300319F6A	TCGA-E9-A1R3-F48697	CC3C4599-3B2A-41F5-B233-DDCD72DFC819	TCGA-E9-A1R3-R30827	BF0CBEB8-1696-468C-B183-5EE4D72E45AC								Modified Radical Mastectomy			1	NO	31	19				45	0				78	55	NO	Tamoxifen			446CE1C9-96D1-4D56-9421-B0D43F05148B		Scheduled Follow-up Submission
TCGA-EW-A6SC-01A					60	Left Upper Outer Quadrant	Primary Tumor Field	Sentinel node biopsy alone		334.45.0	Nationwide Children's Hospital	TCGA-EW-A6SC-D71018	2A348DA5-AB1A-4268-ABFA-73790E39D18B	TCGA-EW-A6SC-F71017	CF93EC15-3023-43A4-9CE7-8B0AFDF5AF21	TCGA-EW-A6SC-R71019	C86CAA33-C1B6-417A-A173-40841EA07E68		Positive					Positive	Lumpectomy				YES	31	12				114	0				169	162		aromatase exemestane		50-59%	A900FE87-EAB4-4AA3-905A-87EAE2E6FE7D
TCGA-B6-A0RM-01A					57	Left		No axillary staging		72.90.0	Nationwide Children's Hospital			TCGA-B6-A0RM-F13797	FAE88C3C-4AE1-4274-B83F-EDF870D50E59				Positive					Positive					NO	31	12					0								Image Analysis		320D1330-0EDF-4F2A-A038-52AFEDA31E65		Scheduled Follow-up Submission
TCGA-D8-A1XV-01A					84	Right Lower Inner Quadrant		Sentinel node biopsy alone		124.80.0	Nationwide Children's Hospital			TCGA-D8-A1XV-F29457	A788378C-1EF4-49A8-B595-22C22A19823D				Positive					Positive	Modified Radical Mastectomy				NO	31	19					0						NO		% IHC		2DBC4B97-3F06-490E-AB68-8C2DA3A33C78		Scheduled Follow-up Submission
TCGA-D8-A1JH-01A					56	Right Lower Outer Quadrant	Primary Tumor Field	Axillary lymph node dissection alone		109.88.0	Nationwide Children's Hospital	TCGA-D8-A1JH-D14056	59F08533-A2E2-4306-8DF3-F18CCAA18F58	TCGA-D8-A1JH-F14055	27D2C49E-FEBC-47D6-8410-8912F0CE7977	TCGA-D8-A1JH-R14057	DF81712D-81A3-4CE4-B1EB-FEA240FD3B8C		Positive					Positive	Modified Radical Mastectomy					31	18				66	0				105	81		nolvadex	manual counting		84B3FC3C-86DD-4395-A8BB-ED48BA80A375		Scheduled Follow-up Submission
TCGA-D8-A27W-01A					55	Right	Primary Tumor Field	Axillary lymph node dissection alone		147.75.0	Nationwide Children's Hospital	TCGA-D8-A27W-D30108	638ECF5D-30BB-4107-95B4-9347666BF398	TCGA-D8-A27W-F30107	12E2DB12-F8A5-49D9-A51C-012731462DE5	TCGA-D8-A27W-R30109	4F59F468-DD4A-40AE-B63B-3DDEA2721CA1		Positive					Positive	Modified Radical Mastectomy				NO	31	2			162	56	0				221	189	NO	doxorubicine+cyclophosphamide	manual counting		8BB436E0-AD84-454C-9F61-C6F26D1A79FF		Scheduled Follow-up Submission
TCGA-BH-A0DV-01A					54	Left	Primary Tumor Field			96.78.0	Nationwide Children's Hospital	TCGA-BH-A0DV-D63675	BB94428A-1E62-47AC-BB42-8CA90FF6F1BD	TCGA-BH-A0DV-F63672	39C1B260-0C00-4D1C-93D1-6F57AB835DD1	TCGA-BH-A0DV-R63676	4BEA7C33-55A3-42B7-97E0-D43F494C6B9D		Positive					Positive	Modified Radical Mastectomy					31	15			177	48	0				223	177	NO	Cytoxan			FE86D6D3-04C9-4CD6-BB94-1426BDDBA28C
TCGA-BH-A0DV-11A					54	Left	Primary Tumor Field			96.78.0	Nationwide Children's Hospital	TCGA-BH-A0DV-D63675	BB94428A-1E62-47AC-BB42-8CA90FF6F1BD	TCGA-BH-A0DV-F63672	39C1B260-0C00-4D1C-93D1-6F57AB835DD1	TCGA-BH-A0DV-R63676	4BEA7C33-55A3-42B7-97E0-D43F494C6B9D		Positive					Positive	Modified Radical Mastectomy					31	15			177	48	0				223	177	NO	Cytoxan			FE86D6D3-04C9-4CD6-BB94-1426BDDBA28C
TCGA-E2-A156-01A					61	Left	Primary Tumor Field	Sentinel node biopsy alone		93.85.0	Nationwide Children's Hospital	TCGA-E2-A156-D18787	9FA71240-8DEF-42FE-9235-91CC3980DDF7	TCGA-E2-A156-F18786	9E28761C-EBC4-40AB-9207-41291C7D40E8	TCGA-E2-A156-R18788	0AF5A75E-1E2C-4321-9544-A1774FEBC9B0		Positive					Positive	Lumpectomy			1	NO	31	8				119	0				123	74	NO	Arimidex			BD63EE80-FC8B-454E-AC82-EEBC70409C68		Scheduled Follow-up Submission
TCGA-OL-A5RX-01A					51	Right Upper Outer Quadrant		Sentinel node biopsy alone		296.54.0	Nationwide Children's Hospital			TCGA-OL-A5RX-F56570	135BBA94-947F-4E8D-88E1-06FFE7C587EC				Positive					Positive	Simple Mastectomy					31	14					0									90-99%	4F9A7A89-B4ED-4E9D-BED8-A54888A13031
TCGA-BH-A18K-01A					46	Left Lower Inner Quadrant		Sentinel lymph node biopsy plus axillary dissection		93.85.0	Nationwide Children's Hospital								Positive					Positive	Other					31	9					0						NO				884C826B-4EEC-4BC3-9686-55EBF4763F22
TCGA-BH-A18K-11A					46	Left Lower Inner Quadrant		Sentinel lymph node biopsy plus axillary dissection		93.85.0	Nationwide Children's Hospital								Positive					Positive	Other					31	9					0						NO				884C826B-4EEC-4BC3-9686-55EBF4763F22
TCGA-BH-A18P-01A					60	Left Lower Inner Quadrant		Sentinel node biopsy alone		93.85.0	Nationwide Children's Hospital								Positive					Negative	Simple Mastectomy					31	22					0									<10%	667332C6-E653-4D3A-8D9B-56457EE2ECD7
TCGA-BH-A18P-11A					60	Left Lower Inner Quadrant		Sentinel node biopsy alone		93.85.0	Nationwide Children's Hospital								Positive					Negative	Simple Mastectomy					31	22					0									<10%	667332C6-E653-4D3A-8D9B-56457EE2ECD7
TCGA-D8-A1JT-01A					70	Left Lower Outer Quadrant		Axillary lymph node dissection alone		109.88.0	Nationwide Children's Hospital	TCGA-D8-A1JT-D14049	A1CE4BC2-90C8-4054-8F71-02F9119342A7	TCGA-D8-A1JT-F14048	61DFE752-C583-4674-9552-F736F4D0D0E5				Positive					Positive	Modified Radical Mastectomy				NO	31	18				47	0							Arimidex		70-79%	EBCF6F16-B29F-4EFD-8814-AC6F7E50366E		Scheduled Follow-up Submission
TCGA-AQ-A0Y5-01A					70	Right		Sentinel lymph node biopsy plus axillary dissection		124.80.0	Nationwide Children's Hospital	TCGA-AQ-A0Y5-D10118	5c09333c-d15e-4c62-ad09-c1984b22cbda	TCGA-AQ-A0Y5-F10119	7CB4C161-65D3-44E6-82F7-CDAA2C40D530										Modified Radical Mastectomy				NO	31	7			146	83	0						NO	Herceptin			E22F0EB8-39E0-4D70-9565-D7A6E9C056BA
TCGA-E9-A1R5-01A					63	Right Upper Outer Quadrant	Primary Tumor Field	Axillary lymph node dissection alone		124.80.0	Nationwide Children's Hospital	TCGA-E9-A1R5-D30843	D4023E14-4199-48D4-A1ED-0B85D63C7BA4	TCGA-E9-A1R5-F48700	05A3A194-C053-42E5-BC72-38C2C5BFDD8D	TCGA-E9-A1R5-R30845	98C41B70-3054-4029-8DA9-02E2B870A48C								Lumpectomy			1	NO	31	19				24	0				92	65	NO	Tamoxifen			71C2F509-7D63-4D5D-AD7C-8F5692AF84D7		Scheduled Follow-up Submission
TCGA-E2-A2P5-01A	YES	NO			78	Left	Regional site	Axillary lymph node dissection alone		185.69.0	Nationwide Children's Hospital	TCGA-E2-A2P5-D33517	BB98F3FD-3E77-42DE-B60F-4556F6BBDBEF	TCGA-E2-A2P5-F68575	76F6E0C5-BD3F-4008-AA91-1E51F54AF7DF	TCGA-E2-A2P5-R33529	9D9DEECE-7130-4B3B-890A-CCBD6A3A989F		Positive					Positive	Modified Radical Mastectomy				NO	31	26				163	0			597	143	98	NO	Arimidex	Allred score = 8		31EEBD11-893A-487B-80DF-F245C66DBFFB		Scheduled Follow-up Submission
TCGA-B6-A0WW-01A	YES	NO	NO		58	Right		Axillary lymph node dissection alone		74.87.0	Nationwide Children's Hospital			TCGA-B6-A0WW-F15734	8CBC2A93-DCB9-4AEF-9C63-54316907C361				Positive					Positive	Modified Radical Mastectomy				NO	31	29					0			447					Image Analysis		5B2E7918-614D-4551-97F8-D2E1E8D46EC8		Scheduled Follow-up Submission
TCGA-OL-A66I-01A					36	Right Upper Outer Quadrant	Primary Tumor Field	Sentinel node biopsy alone		305.50.0	Nationwide Children's Hospital	TCGA-OL-A66I-D65247	BFFBBF56-08F9-40CB-99D1-13CE9A5FB330	TCGA-OL-A66I-F58496	43440205-5036-4417-B0CB-BF085DC77CFC	TCGA-OL-A66I-R64843	BD0C1305-129A-41D6-94AD-5D5CACC08ABB		Negative					Negative	Lumpectomy					31	11			312	43	0				285	239		TAXOL			E2CDC0AB-BA8E-4923-A6FB-0E764D08A6CC
TCGA-E9-A22A-01A					74	Right Lower Outer Quadrant		Axillary lymph node dissection alone		136.76.0	Nationwide Children's Hospital	TCGA-E9-A22A-D29838	5D55C0D5-040F-4184-A845-1D4A4FEB2ADC	TCGA-E9-A22A-F39785	0A926351-9B94-4D55-9D38-4EB8CBCBB2D3				Positive					Negative					YES	31	1				111	0						NO	Tamoxifen		10-19%	10412F6A-2D88-4E47-9010-DCC721477EA6		Scheduled Follow-up Submission
TCGA-EW-A1J2-01A					50	Right Lower Inner Quadrant		Sentinel lymph node biopsy plus axillary dissection		109.88.0	Nationwide Children's Hospital	TCGA-EW-A1J2-D29266	7CC33BB1-6AF2-42C9-9E77-17C799E6CB7E	TCGA-EW-A1J2-F21544	D0492C5F-C48F-4FF0-92F1-074003210DFE				Positive	3 Point Scale	3+	3 Point Scale		Positive	Other				YES	31	6			140	76	0						NO	Cytoxan		90-99%	FB7BBF25-FE34-4B6F-8418-C8C63E1EBD65		Scheduled Follow-up Submission
TCGA-A8-A08L-01A					89	Left	Primary Tumor Field			47.97.0	Nationwide Children's Hospital			TCGA-A8-A08L-F40847	621DB5E5-F1F5-43B1-8D8C-45A3E8C58EEC	TCGA-A8-A08L-R38161	D73DFE9C-A7EF-4DD0-8879-04052984D07D		Positive					Negative	Other					31	2					0				61	31					EB2C85FD-5355-4F15-AE95-0B078438D9CA
TCGA-B6-A408-01A					55	Left	Primary Tumor Field	Axillary lymph node dissection alone		255.56.0	Nationwide Children's Hospital	TCGA-B6-A408-D41050	2ABDCF82-F819-4FBE-9C37-623C5AC08467	TCGA-B6-A408-F59666	3C48974E-14E5-44BF-B964-C5E7C18FF99F	TCGA-B6-A408-R41053	A2EEA4E4-5B15-4FB4-A169-6ABF975476FF		Positive	4 Point Scale	3+	4 Point Scale		Positive	Simple Mastectomy				NO	31	3			163	58	0				244	208		Doxorubicin		90-99%	E4E12BFB-D053-4280-81ED-F1C61DD5F1D5	2.6
TCGA-AN-A0XO-01A					59	Left Upper Outer Quadrant				74.87.0	Nationwide Children's Hospital			TCGA-AN-A0XO-F68957	24DEF0F1-801A-49B6-B800-68003374231A				Positive					Negative						31	23					0						NO				596515CE-876B-4522-B2B4-AA3F71F705BC
TCGA-WT-AB41-01A					55	Left Lower Outer Quadrant		No axillary staging		379.34.0	Nationwide Children's Hospital	TCGA-WT-AB41-D62425	1D21BF3A-67F1-4026-A0E6-739FCA50B55A	TCGA-WT-AB41-F66639	BF795D81-B99B-4A0E-9A01-42FDB7F837BD				Positive	3 Point Scale	1+	3 Point Scale		Positive	Modified Radical Mastectomy					31	21			150	89	0							Cytoxan		90-99%	636CAD18-72C1-4E19-859F-CF74811517AB
TCGA-C8-A138-01A					54	Left		Axillary lymph node dissection alone		85.85.0	Nationwide Children's Hospital			TCGA-C8-A138-F71893	CA8159BD-20C6-4347-8D27-78773527103D				Positive					Negative	Modified Radical Mastectomy					31	31					0						NO				0A6160AC-0548-40A1-B091-C7E9B8D9E783		Scheduled Follow-up Submission
TCGA-B6-A0I5-01A					49	Right Lower Inner Quadrant		Axillary lymph node dissection alone		56.90.0	Nationwide Children's Hospital			TCGA-B6-A0I5-F71505	D037DF28-A91C-4F37-9DAE-68F9CB4A367E				Positive					Positive	Other				NO	31	26					0										A22EF4A7-0F22-4BF3-8148-034ACFDF9238		Scheduled Follow-up Submission
TCGA-AR-A1AL-01A					60	Left Upper Outer Quadrant	Primary Tumor Field	Sentinel lymph node biopsy plus axillary dissection		96.78.0	Nationwide Children's Hospital	TCGA-AR-A1AL-D22163	D49EE915-818B-484E-BE1B-15C7D3685DF8	TCGA-AR-A1AL-F69272	578E2FC1-A2D0-4E95-9683-5CA06AD1313D	TCGA-AR-A1AL-R22157	9613B599-7554-4DD1-BFA1-DD813EC257DB		Positive					Positive	Simple Mastectomy			1	YES	31	31				387	0				192	153		Letrozole		70-79%	AA9E4BE7-1D05-44D5-A880-345610E42D1B		Scheduled Follow-up Submission
TCGA-A1-A0SB-01A					70	Left		Sentinel node biopsy alone		117.78.0	Nationwide Children's Hospital								Positive					Negative	Lumpectomy					31	30					0						NO			70-79%	5972F57C-D523-4DA9-92DC-0977E0576F23
TCGA-C8-A1HK-01A					53	Right		Axillary lymph node dissection alone		109.88.0	Nationwide Children's Hospital			TCGA-C8-A1HK-F19100	A1CA0508-80BE-4CA1-A509-E54F50DEB1A9				Negative					Negative	Other					31	2					0						NO				6CF7AAC1-CF63-491E-ADDF-FA5B6C61A8C9		Scheduled Follow-up Submission
TCGA-BH-A0W3-01A					58	Left Upper Inner Quadrant	Regional site			74.87.0	Nationwide Children's Hospital			TCGA-BH-A0W3-F34065	0C4DAF8C-F0CA-4E03-9F35-21E17062ECEB	TCGA-BH-A0W3-R34067	A6B969D8-4A1C-4537-94C9-B06187812BFA		Positive					Positive	Other					31	29					0				96	63					BA8302AB-9865-4DB7-84BD-DA2BCF860F46		Scheduled Follow-up Submission
TCGA-A2-A0T4-01A					62	Right Upper Inner Quadrant		Other (specify)	SLN and non-SLN biopsy	72.90.0	Nationwide Children's Hospital	TCGA-A2-A0T4-D3991	c3b20047-64e2-4f31-b600-d2eb3c74c467	TCGA-A2-A0T4-F13948	43B17021-D7A9-468C-8D2B-2554DDEBFC47				Positive		2+			Positive	Simple Mastectomy				YES	31	12				85	0							Femara		90-99%	908E9C94-7610-4909-AB27-54A54D768AFF		Scheduled Follow-up Submission
TCGA-BH-A0BS-01A					55	Left	Regional site			96.78.0	Nationwide Children's Hospital	TCGA-BH-A0BS-D63400	993049EF-D3F7-4F12-B97F-3D6AE4023498	TCGA-BH-A0BS-F61955	7D2BC44D-7ED6-4B0D-84B9-31E38397201F	TCGA-BH-A0BS-R63398	FB9FF030-2089-4C98-BB5C-D04016148325		Positive					Positive	Simple Mastectomy					31	7			207	44	0				302	245	NO	Cytoxan			A3E73513-48A3-4F0C-9F35-9603FAB0AFCA
TCGA-BH-A0BS-11A					55	Left	Regional site			96.78.0	Nationwide Children's Hospital	TCGA-BH-A0BS-D63400	993049EF-D3F7-4F12-B97F-3D6AE4023498	TCGA-BH-A0BS-F61955	7D2BC44D-7ED6-4B0D-84B9-31E38397201F	TCGA-BH-A0BS-R63398	FB9FF030-2089-4C98-BB5C-D04016148325		Positive					Positive	Simple Mastectomy					31	7			207	44	0				302	245	NO	Cytoxan			A3E73513-48A3-4F0C-9F35-9603FAB0AFCA
TCGA-BH-A0DQ-01A					42	Right	Primary Tumor Field	Sentinel lymph node biopsy plus axillary dissection		72.90.0	Nationwide Children's Hospital	TCGA-BH-A0DQ-D4556	9B9ED158-839A-41DD-A7B0-844FA3D347A2	TCGA-BH-A0DQ-F4560	CDBA9234-AC86-44D5-A25D-CDFA2E27F36D	TCGA-BH-A0DQ-R4559	54780F16-C78A-4736-AE8D-0FDF2D5C1D37								Other			1	NO	31	16			309	225	0				377	329		TAXOL			DF0B2822-5CF6-4892-80AE-093EA1C3C43C
TCGA-BH-A0DQ-11A					42	Right	Primary Tumor Field	Sentinel lymph node biopsy plus axillary dissection		72.90.0	Nationwide Children's Hospital	TCGA-BH-A0DQ-D4556	9B9ED158-839A-41DD-A7B0-844FA3D347A2	TCGA-BH-A0DQ-F4560	CDBA9234-AC86-44D5-A25D-CDFA2E27F36D	TCGA-BH-A0DQ-R4559	54780F16-C78A-4736-AE8D-0FDF2D5C1D37								Other			1	NO	31	16			309	225	0				377	329		TAXOL			DF0B2822-5CF6-4892-80AE-093EA1C3C43C
TCGA-A2-A25B-01A					39	Left Upper Outer Quadrant		Sentinel lymph node biopsy plus axillary dissection		142.78.0	Nationwide Children's Hospital	TCGA-A2-A25B-D31264	05A1B7D2-5DCF-454F-9FE4-33CA8289D1B2	TCGA-A2-A25B-F70679	81C18AFE-BEA7-4D08-875B-339FFEA2E95D	TCGA-A2-A25B-R14506	45D50414-CE7E-456B-BB0F-D49E70BB491D		Positive					Positive	Simple Mastectomy			1	NO	31	2				293	0			1290		188	NO	Tamoxifen		90-99%	E10F1684-E8CF-4C23-9E58-5E29330B88E6		Scheduled Follow-up Submission
TCGA-A1-A0SJ-01A					39	Left		Sentinel lymph node biopsy plus axillary dissection		72.90.0	Nationwide Children's Hospital								Positive					Positive	Modified Radical Mastectomy					31	6					0									70-79%	9227291D-DB92-47F2-9608-370787DE71EB	4
TCGA-A8-A09X-01A					62	Left Upper Inner Quadrant				47.97.0	Nationwide Children's Hospital								Negative					Negative	Other					31	27					0										D95A34AF-5C39-4153-8FA8-C6172D24CD54
TCGA-E9-A1N3-01A					70	Right Upper Inner Quadrant		Axillary lymph node dissection alone		136.76.0	Nationwide Children's Hospital	TCGA-E9-A1N3-D29142	3B2AB151-9032-4CCD-9351-CD95CFE9FBFD	TCGA-E9-A1N3-F62627	51209566-A8D1-4EC8-8974-323532A10AAB										Modified Radical Mastectomy				NO	31	22				130	0						NO	Tamoxifen			5417AF21-8BE9-4915-A52E-68B6E818F4FA		Scheduled Follow-up Submission
TCGA-A2-A0YT-01A					56	Left Upper Outer Quadrant	Primary Tumor Field	Axillary lymph node dissection alone		74.87.0	Nationwide Children's Hospital	TCGA-A2-A0YT-D5687	5b1e9a0c-a2c4-41f0-a952-c9b39c961f76	TCGA-A2-A0YT-F15768	11090CD1-89D2-476B-BC1F-AA586743C2A8	TCGA-A2-A0YT-R5683	2af6a586-e409-4367-a05b-da5e9fd37b28		Positive					Negative	Modified Radical Mastectomy			1	NO	31	30			723	286	0				280	231		Arimidex		90-99%	5AC32B71-8987-4B07-BDBC-02F437869AE3		Scheduled Follow-up Submission
TCGA-A8-A06X-01A					77	Right Upper Outer Quadrant	Primary Tumor Field			47.97.0	Nationwide Children's Hospital			TCGA-A8-A06X-F40818	1791687B-A509-4CA3-B10E-4EDB80B779B6	TCGA-A8-A06X-R38179	0E1337C9-4541-4CCF-B78A-A3CF4F763A06		Positive					Negative	Other					31	2					0				92	61					9C4A0121-5281-4365-863C-FE76975E676E
TCGA-GM-A2DI-01A					52	Left Upper Inner Quadrant		Sentinel node biopsy alone		177.73.0	Nationwide Children's Hospital	TCGA-GM-A2DI-D47093	2D81179B-0BEB-492F-8B9F-5FA57D8F59D0	TCGA-GM-A2DI-F47089	64BBFF53-4A07-4474-8016-57DEE132EC2E				Negative					Negative	Simple Mastectomy				YES	31	22			217	154	0						NO	Cytoxan		<10%	C60FC1BC-A896-4192-A988-A384C6A267FE	3.33
TCGA-GM-A2DI-11A					52	Left Upper Inner Quadrant		Sentinel node biopsy alone		177.73.0	Nationwide Children's Hospital	TCGA-GM-A2DI-D47093	2D81179B-0BEB-492F-8B9F-5FA57D8F59D0	TCGA-GM-A2DI-F47089	64BBFF53-4A07-4474-8016-57DEE132EC2E				Negative					Negative	Simple Mastectomy				YES	31	22			217	154	0						NO	Cytoxan		<10%	C60FC1BC-A896-4192-A988-A384C6A267FE	3.33
TCGA-A8-A0A4-01A					73	Left				47.97.0	Nationwide Children's Hospital	TCGA-A8-A0A4-D37900	D8E03D97-D2C6-498F-8B32-372ACA5AB2C9	TCGA-A8-A0A4-F40326	BE77F294-FAE5-4040-A6EA-671C8915B7F9				Positive					Positive	Other					31	16				215	0							Letrozole			B281DC7D-14C6-4035-8924-73FE20C2A579
TCGA-AO-A0JG-01A					49	Right	Regional site	Axillary lymph node dissection alone		72.90.0	Nationwide Children's Hospital	TCGA-AO-A0JG-D3216	a33b3892-3e6b-4da6-9f8e-d172913aa440	TCGA-AO-A0JG-F15492	B37C0A82-E26C-40E9-AC60-492996CD6E5E	TCGA-AO-A0JG-R3214	6e8b98b1-8cb9-4b43-b0cd-fcac615f65a2								Modified Radical Mastectomy			1	NO	31	22			122	80	0				273	238		DOXORUBICIN			F17861CF-B78C-4E19-BB77-B2E5C7746008		Scheduled Follow-up Submission
TCGA-A2-A0CY-01A					63	Left Lower Outer Quadrant		Sentinel lymph node biopsy plus axillary dissection		56.90.0	Nationwide Children's Hospital	TCGA-A2-A0CY-D2040	bad877aa-b726-4dc3-ab46-c4c508f5b58c	TCGA-A2-A0CY-F13731	AE7B55F3-F2F1-4FA6-9921-07C9E99F7EEB				Positive					Positive	Simple Mastectomy				YES	31	9			665	634	0							Anastrozole		90-99%	E3B26E4A-2890-47A5-BD15-96A96CAA9ABD		Scheduled Follow-up Submission
TCGA-A2-A0SW-01A	NO	NO	NO		82	Right	Primary Tumor Field	Sentinel lymph node biopsy plus axillary dissection		72.90.0	Nationwide Children's Hospital	TCGA-A2-A0SW-D3703	1e0659e4-5a29-4057-a83b-90e3e8f398ee	TCGA-A2-A0SW-F3701	11921C4C-DBDF-41E9-B605-4FF55BB12DDE	TCGA-A2-A0SW-R3704	b82f6467-290c-4472-9248-1095701eaf20								Lumpectomy			1	NO	31	8			1365	479	0			653		54		Tamoxifen			8DFEF16D-0581-4816-9A37-6AF0D250BF81
TCGA-A7-A6VX-01A					68	Left Upper Outer Quadrant	Primary Tumor Field	Sentinel node biopsy alone		338.45.0	Nationwide Children's Hospital	TCGA-A7-A6VX-D57517	699D81B9-5EC8-4E6A-AE3A-3C9AD9B40B98	TCGA-A7-A6VX-F57518	447123BC-55E4-401F-9F3E-452E63FAED88	TCGA-A7-A6VX-R57531	77DBF440-49CC-420D-B998-91FAAED0B34A		Positive					Positive	Lumpectomy				NO	31	13				230	0				220	206		Anastrazole	Immune Stain by GenPath	90-99%	3397745D-EFF6-40D8-A391-8F15C30BF162
TCGA-AO-A03V-01A					41	Left		Sentinel node biopsy alone		85.85.0	Nationwide Children's Hospital	TCGA-AO-A03V-D6002	a7b71a1a-29a2-4ced-9a77-1b29bf37f48a	TCGA-AO-A03V-F20912	DB9D76BF-ADFA-4518-ADEC-B8FE3E187699										Simple Mastectomy				YES	31	24			735	200	0							Tamoxifen			EA605488-5417-4B12-A798-0A2883C7AFC1		Scheduled Follow-up Submission
TCGA-EW-A1J5-01A					59	Left		Sentinel node biopsy alone		109.88.0	Nationwide Children's Hospital	TCGA-EW-A1J5-D29270	A98E7CEA-1E32-4CF2-B77F-F32B2B286E90	TCGA-EW-A1J5-F21353	B3590EA5-E070-473D-8CCB-BE97155CED82				Positive	3 Point Scale	3+	3 Point Scale		Positive	Other				YES	31	6			247	94	0						NO	Cyclophosphamide		90-99%	1025CBC6-9FCC-4EE0-A0F1-708EF682240B		Scheduled Follow-up Submission
TCGA-A7-A0CH-01A					79	Left		Sentinel node biopsy alone		47.97.0	Nationwide Children's Hospital	TCGA-A7-A0CH-D2934	2daa89c3-a79e-4a11-9bd4-c2472930362c	TCGA-A7-A0CH-F39148	70682038-C827-4F58-A9DC-8433BFCE1CF6										Simple Mastectomy				YES	31	14				107	0							Arimidex			1C15A032-2563-4086-98FC-EA11295F507E
TCGA-A7-A0CH-11A					79	Left		Sentinel node biopsy alone		47.97.0	Nationwide Children's Hospital	TCGA-A7-A0CH-D2934	2daa89c3-a79e-4a11-9bd4-c2472930362c	TCGA-A7-A0CH-F39148	70682038-C827-4F58-A9DC-8433BFCE1CF6										Simple Mastectomy				YES	31	14				107	0							Arimidex			1C15A032-2563-4086-98FC-EA11295F507E
TCGA-A2-A0CQ-01A					62	Right	Primary Tumor Field	Sentinel node biopsy alone		56.90.0	Nationwide Children's Hospital	TCGA-A2-A0CQ-D1990	71de8349-bb98-4691-8138-1cdcc08f849c	TCGA-A2-A0CQ-F13723	3276C085-4370-48D5-9BA7-76ADDE69842D	TCGA-A2-A0CQ-R1985	e74c5228-76c3-41d0-99f3-307ae0373b37	Negative	Positive				Lumpectomy	Positive	Lumpectomy			1	YES	31	10			628	492	0				236	188		AE-37		90-99%	919EEBCC-F391-4D78-B0B3-AEF15072D7D6		Scheduled Follow-up Submission
TCGA-GM-A2D9-01A	YES	NO			69	Left Upper Inner Quadrant	Distant Recurrence	Sentinel node biopsy alone		177.73.0	Nationwide Children's Hospital	TCGA-GM-A2D9-D47257	F83B835B-003A-4E5D-AA90-9504C8171A8D	TCGA-GM-A2D9-F47033	6B63FE41-80F5-49EC-9AD0-40B71FED880D	TCGA-GM-A2D9-R47253	21CA09CB-DF2B-458F-813B-66DA60B6C923		Positive	3 Point Scale	3+	3 Point Scale		Positive	Lumpectomy				YES	31	21			1567	1470	0			1351	1434	1413	YES	Gemcitabine		90-99%	53002EFD-3EBF-458B-A0E1-3FA82BC56EE7	1.93
TCGA-GM-A2D9-11A	YES	NO			69	Left Upper Inner Quadrant	Distant Recurrence	Sentinel node biopsy alone		177.73.0	Nationwide Children's Hospital	TCGA-GM-A2D9-D47257	F83B835B-003A-4E5D-AA90-9504C8171A8D	TCGA-GM-A2D9-F47033	6B63FE41-80F5-49EC-9AD0-40B71FED880D	TCGA-GM-A2D9-R47253	21CA09CB-DF2B-458F-813B-66DA60B6C923		Positive	3 Point Scale	3+	3 Point Scale		Positive	Lumpectomy				YES	31	21			1567	1470	0			1351	1434	1413	YES	Gemcitabine		90-99%	53002EFD-3EBF-458B-A0E1-3FA82BC56EE7	1.93
TCGA-A2-A04R-01A					36	Left Upper Inner Quadrant	Primary Tumor Field	Sentinel node biopsy alone		74.87.0	Nationwide Children's Hospital	TCGA-A2-A04R-D2552	7430b157-f641-4b64-86b4-38f47b845980	TCGA-A2-A04R-F59315	C91D9225-7AD4-4F0C-9851-D37807AA970A	TCGA-A2-A04R-R2557	7b76f4d4-65c9-4ff3-abef-09844e8fc56a								Lumpectomy			1	YES	31	8			45	45	0				342	300		TAXOL			87A5E2F6-3428-4F5F-AAF4-3839544E18A9
TCGA-A2-A25E-01A	YES	NO			34	Left Upper Outer Quadrant	Primary Tumor Field	Axillary lymph node dissection alone		142.78.0	Nationwide Children's Hospital	TCGA-A2-A25E-D44981	99D343A1-BE9A-407D-80DC-45B049932EE1	TCGA-A2-A25E-F44982	6AAA3968-F33A-48E5-AFBE-404BF56B0F02	TCGA-A2-A25E-R14572	5A937750-CD3F-454B-99C4-779547CF9062		Positive					Positive	Modified Radical Mastectomy			1	NO	31	2				3055	0		3024	2989	333	292	NO	Anastrozole		80-89%	0D608B6C-7CCC-445E-AF67-963C477FDF33		Scheduled Follow-up Submission
TCGA-D8-A1XF-01A					45	Left Upper Outer Quadrant		Axillary lymph node dissection alone		120.76.0	Nationwide Children's Hospital	TCGA-D8-A1XF-D29443	0C6384BF-1F92-4793-B12E-4B62D23851CC	TCGA-D8-A1XF-F29442	F9DFA106-1DBD-4EB8-9586-DF8D2300FB35				Positive					Positive	Modified Radical Mastectomy				NO	31	19			356	311	0						NO	adriamycin+cyclophosphamide	% IHC		1C171308-B585-4934-94A9-E7BA0125440F		Scheduled Follow-up Submission
TCGA-AC-A7VB-01A					51	Right Lower Outer Quadrant		Sentinel lymph node biopsy plus axillary dissection		360.42.0	Nationwide Children's Hospital			TCGA-AC-A7VB-F66026	1B155B86-984D-4C0B-995C-F687FDA6901E				Positive					Negative	Modified Radical Mastectomy				NO	31	1					0									80-89%	EFD18520-FCEE-4FFB-B6D1-CC1E2D09A6AB
TCGA-AO-A12B-01A					63	Right		Sentinel node biopsy alone		80.83.0	Nationwide Children's Hospital	TCGA-AO-A12B-D5960	36ded530-1c08-428f-a97e-7c11db1a953c	TCGA-AO-A12B-F43473	3FA3F48A-1DC7-49B7-BA5C-07AB14D891F2										Simple Mastectomy				YES	31	22			118	45	0							Fluorouracil			6628EB18-E69E-44A0-9084-354512737578		Scheduled Follow-up Submission
TCGA-E9-A295-01A					71	Right Lower Outer Quadrant	Regional site	Axillary lymph node dissection alone		147.75.0	Nationwide Children's Hospital	TCGA-E9-A295-D35357	C6FF0A55-DD00-4370-882C-4CDA4D7F524D	TCGA-E9-A295-F35355	3DDA0B38-4114-4BCD-8EB4-4D82877CC1FC	TCGA-E9-A295-R35358	20725E45-0E63-4739-8B3F-414F2BBAAC47		Positive					Positive	Modified Radical Mastectomy				YES	31	25				152	0				74	46		Tamoxifen		80-89%	B8AE2E8C-6574-43C2-999C-E8CD9D57D04B
TCGA-OL-A66L-01A					71	Right Lower Inner Quadrant	Primary Tumor Field			322.49.0	Nationwide Children's Hospital			TCGA-OL-A66L-F58493	43834AEE-2446-4577-8539-711FEA80E30F	TCGA-OL-A66L-R46789	A689A4CE-EE17-4BFB-B69D-86DDFF35870F		Positive					Positive	Lumpectomy					31	11					0				120	71				90-99%	640C4077-6347-4DE5-AA90-2F602C0FAEB0
TCGA-AC-A62V-01A					58	Right Lower Outer Quadrant	Distant site	Axillary lymph node dissection alone		322.49.0	Nationwide Children's Hospital	TCGA-AC-A62V-D60180	356FD6D4-61DF-485A-AB87-3A4A43CFC9B7	TCGA-AC-A62V-F60177	CB4E105E-D21E-4F43-A860-F45AEEAD0E9A	TCGA-AC-A62V-R60178	6A2AE9B0-D973-40FF-9BC8-C68CA9049408		Positive					Positive	Modified Radical Mastectomy				NO	31	31			245	114	0				46	21		Paclitaxel		90-99%	239D3329-DD28-4F02-A0B9-B36F0C5E06E8
TCGA-C8-A1HF-01A					48	Left		Axillary lymph node dissection alone		103.78.0	Nationwide Children's Hospital			TCGA-C8-A1HF-F19092	437A6D3E-663B-42B1-840D-510BF0CA88B9				Negative					Positive	Other				NO	31	2					0						NO				F22445CF-09DD-445D-82B3-DD2D4D657522		Scheduled Follow-up Submission
TCGA-E2-A572-01A					72	Left	Primary Tumor Field	Axillary lymph node dissection alone		322.49.0	Nationwide Children's Hospital	TCGA-E2-A572-D48251	50D48DA4-E3E7-49B4-9DCA-3BDA540825A4	TCGA-E2-A572-F65007	1E6255EF-F076-40C9-8A5B-35FC4FF7CA8B	TCGA-E2-A572-R48248	6AF2B719-A8B2-4E95-BAF5-C4FAFA2FF01A		Positive	3 Point Scale	1+	3 Point Scale		Positive	Modified Radical Mastectomy				YES	31	17				263	0				263	196		Arimidex			3C444739-9589-4408-8717-B420023894C4
TCGA-E2-A14S-01A					65	Left Lower Outer Quadrant	Primary Tumor Field	Sentinel node biopsy alone		93.85.0	Nationwide Children's Hospital	TCGA-E2-A14S-D18832	DFE33AFA-BE0A-47EB-AA3E-07745099111C	TCGA-E2-A14S-F18831	BA1A9FEA-BC27-4CF3-95A9-65E53B46B582	TCGA-E2-A14S-R18837	4A373E26-3FEB-48D8-B451-FAD04381BE4F		Positive					Positive	Lumpectomy			1	NO	31	3			119	50	0				212	160	NO	Cytoxan	Allred score 5+3 = 8		313D0FC8-2ECB-4DA2-B128-5E70E8A8762F		Scheduled Follow-up Submission
TCGA-GM-A5PV-01A					63	Right		Sentinel lymph node biopsy plus axillary dissection		296.54.0	Nationwide Children's Hospital	TCGA-GM-A5PV-D42166	F72DFCCB-CAB4-4F6D-8B1B-FC0364E48134						Positive					Positive	Modified Radical Mastectomy				NO	31	12			174	107	0							Cytoxan		90-99%	205F48E7-10C4-45BD-8827-DB4A7B3D0AF0	2.70
TCGA-E2-A15E-01A					40	Left	Primary Tumor Field	Sentinel lymph node biopsy plus axillary dissection		93.85.0	Nationwide Children's Hospital	TCGA-E2-A15E-D18925	9E5B5BB6-2140-4A7E-A602-A78255F5E0C5	TCGA-E2-A15E-F18919	D9946A73-A046-481D-A377-E617A25BB8FB	TCGA-E2-A15E-R18922	47F13F36-41AE-454A-B878-B9F1AE276011		Positive					Positive	Lumpectomy			1	NO	31	9			489	119	0				275	218	NO	trastuzumab	Allred score 5+3 = 8		DB0B77FA-8BD7-42CF-A925-2468A520338F		Scheduled Follow-up Submission
TCGA-E2-A15E-06A					40	Left	Primary Tumor Field	Sentinel lymph node biopsy plus axillary dissection		93.85.0	Nationwide Children's Hospital	TCGA-E2-A15E-D18925	9E5B5BB6-2140-4A7E-A602-A78255F5E0C5	TCGA-E2-A15E-F18919	D9946A73-A046-481D-A377-E617A25BB8FB	TCGA-E2-A15E-R18922	47F13F36-41AE-454A-B878-B9F1AE276011		Positive					Positive	Lumpectomy			1	NO	31	9			489	119	0				275	218	NO	trastuzumab	Allred score 5+3 = 8		DB0B77FA-8BD7-42CF-A925-2468A520338F		Scheduled Follow-up Submission
TCGA-AR-A1AV-01A					68	Left	Primary Tumor Field	Axillary lymph node dissection alone		96.78.0	Nationwide Children's Hospital	TCGA-AR-A1AV-D22104	E8AA4773-70EB-4FBD-AE3E-8881E5D8E348	TCGA-AR-A1AV-F49475	12EE7C6D-9BA2-461A-BD10-888FCEFE23B5	TCGA-AR-A1AV-R22101	CE98B1FF-7DB1-4336-AA1A-8BB3B2510D22		Positive					Positive	Modified Radical Mastectomy			1		31	2			105	50	0				239	194		Doxorubicin		70-79%	3F960809-D14A-4E1F-8986-2BDDB99F09B5		Scheduled Follow-up Submission
TCGA-AC-A3EH-01A					79	Right		Axillary lymph node dissection alone		227.60.0	Nationwide Children's Hospital			TCGA-AC-A3EH-F65834	040824B3-8139-4984-8578-00C653C57223				Positive					Negative	Modified Radical Mastectomy				NO	31	30					0										49FD990A-FF01-4A83-954C-0F9264B2FA58
TCGA-AC-A3EH-11B					79	Right		Axillary lymph node dissection alone		227.60.0	Nationwide Children's Hospital			TCGA-AC-A3EH-F65834	040824B3-8139-4984-8578-00C653C57223				Positive					Negative	Modified Radical Mastectomy				NO	31	30					0										49FD990A-FF01-4A83-954C-0F9264B2FA58
TCGA-A8-A09Z-01A					83	Right				47.97.0	Nationwide Children's Hospital								Positive					Negative	Other					31	27					0										A5A03609-4C6F-4F08-8462-69479E9B6E8E
TCGA-C8-A8HP-01A					59	Left Upper Outer Quadrant		Axillary lymph node dissection alone		372.39.0	Nationwide Children's Hospital	TCGA-C8-A8HP-D69613	FDA16E46-3280-4A4A-914B-F4BC3F889323	TCGA-C8-A8HP-F69610	91FF3ABD-E5CD-49E0-BDE9-3D9971E451A6				Negative					Negative	Modified Radical Mastectomy					31	15			224	31	0							Cyclophosphamide			44B466C0-11C4-4615-BDBF-ECAAF45CAB34
TCGA-GM-A2DD-01A					53	Right		Sentinel node biopsy alone		167.74.0	Nationwide Children's Hospital	TCGA-GM-A2DD-D47073	30DC9EB0-B305-4BC7-B006-221E80F1AE25	TCGA-GM-A2DD-F47070	1AC34321-8651-4F6E-B962-E0E9FC7860EC				Negative					Negative	Simple Mastectomy				YES	31	22			202	90	0						NO	Cytoxan		<10%	060D3471-0B8B-4CF5-94B7-AAFC45012073	1.45
TCGA-E9-A1NC-01A					61	Right Upper Inner Quadrant		Axillary lymph node dissection alone		136.76.0	Nationwide Children's Hospital	TCGA-E9-A1NC-D32909	A78DF706-2990-4314-934D-7EFD5C578BD5	TCGA-E9-A1NC-F40639	9D94E73F-C799-4D60-8226-7DEEBDA60156				Negative					Positive					YES	31	26			708	134	0						NO	Tamoxifen			0CF084A2-EC52-46CF-9683-199DC4849C78		Scheduled Follow-up Submission
TCGA-GM-A3XL-01A					49	Right Upper Outer Quadrant	Primary Tumor Field	Sentinel node biopsy alone		234.53.0	Nationwide Children's Hospital	TCGA-GM-A3XL-D35526	A7375485-9703-446C-A59F-3E2E7F2A3E83	TCGA-GM-A3XL-F41970	FD97C14F-E6E6-45D7-9912-84402AECAD79	TCGA-GM-A3XL-R35522	5579FB1C-390D-4919-A4B9-138CA5AF97BB		Negative					Negative	Lumpectomy				YES	31	8			248	191	0				315	274		Paclitaxel		<10%	9177B0EA-B107-416D-889E-EA1FAF128B91
TCGA-A1-A0SH-01A					39	Left Upper Inner Quadrant		Sentinel node biopsy alone		72.90.0	Nationwide Children's Hospital	TCGA-A1-A0SH-D4488	13E24868-A281-4960-AF6C-21F950AF311B						Negative					Positive	Lumpectomy					31	7			179	102	0							TC			FF9B17A1-681E-4F17-9360-EB38F4FFB4ED	1.8
TCGA-B6-A0IK-01A	YES	YES	YES		63	Left				61.88.0	Nationwide Children's Hospital			TCGA-B6-A0IK-F12621	5C061F46-F69E-458A-A125-056C62D4E583			Negative	Negative				Modified radical mastectomy	Negative	Lumpectomy				NO	31	2		489			0			489					Image Analysis		30B47CCF-D4DD-4EBA-8B82-C362BC40D503		Scheduled Follow-up Submission
TCGA-AR-A5QM-01A					62	Left	Primary Tumor Field	Sentinel lymph node biopsy plus axillary dissection		288.54.0	Nationwide Children's Hospital	TCGA-AR-A5QM-D43857	D7CB0EED-DFD0-48DF-AE12-84DB425177EF	TCGA-AR-A5QM-F43848	075D1C9B-74C2-4011-925E-872B1109BD5F	TCGA-AR-A5QM-R43856	5B7461B2-C13C-47B1-B736-33437677102C		Positive					Positive	Other					31	10				36	0				82	36		Anastrozole			0AAC0A9F-5FBB-421B-8FDD-58C6BAE83083
TCGA-BH-A0AZ-01A					47	Right				96.78.0	Nationwide Children's Hospital	TCGA-BH-A0AZ-D58608	BA304867-79FD-4DED-96AF-D5D57DA4D09C	TCGA-BH-A0AZ-F58602	40B2DDD4-6B7C-471E-AD6F-4FCF39C6E504				Positive					Positive	Other					31	15			482	126	0						NO	Avastin			FAB0343F-CF3C-47B6-BDDE-98070195E3CA
TCGA-BH-A0AZ-11A					47	Right				96.78.0	Nationwide Children's Hospital	TCGA-BH-A0AZ-D58608	BA304867-79FD-4DED-96AF-D5D57DA4D09C	TCGA-BH-A0AZ-F58602	40B2DDD4-6B7C-471E-AD6F-4FCF39C6E504				Positive					Positive	Other					31	15			482	126	0						NO	Avastin			FAB0343F-CF3C-47B6-BDDE-98070195E3CA
TCGA-E9-A1N4-01A					41	Left Upper Inner Quadrant	Regional site	Axillary lymph node dissection alone		124.80.0	Nationwide Children's Hospital	TCGA-E9-A1N4-D39768	80B1429D-E3E0-4E41-B47E-344887D4864D	TCGA-E9-A1N4-F39767	7A3C4560-6D33-44A1-BC57-E835DFEC288C	TCGA-E9-A1N4-R29815	B5ADCED0-177B-4804-9589-C6F334CE467D		Positive					Positive					NO	31	1				230	0				96	69	NO	Tamoxifen			FF0970D9-C68E-4AF3-B2FE-9E20266B914A		Scheduled Follow-up Submission
TCGA-E9-A1N4-11A					41	Left Upper Inner Quadrant	Regional site	Axillary lymph node dissection alone		124.80.0	Nationwide Children's Hospital	TCGA-E9-A1N4-D39768	80B1429D-E3E0-4E41-B47E-344887D4864D	TCGA-E9-A1N4-F39767	7A3C4560-6D33-44A1-BC57-E835DFEC288C	TCGA-E9-A1N4-R29815	B5ADCED0-177B-4804-9589-C6F334CE467D		Positive					Positive					NO	31	1				230	0				96	69	NO	Tamoxifen			FF0970D9-C68E-4AF3-B2FE-9E20266B914A		Scheduled Follow-up Submission
TCGA-AR-A5QP-01A					54	Left	Primary Tumor Field	Sentinel lymph node biopsy plus axillary dissection		296.54.0	Nationwide Children's Hospital	TCGA-AR-A5QP-D43914	8150DA11-23B1-4826-AD05-FFB7FBE8410D	TCGA-AR-A5QP-F43875	8273D0A2-FA6A-44B5-B288-5F1049F5C9E5	TCGA-AR-A5QP-R43913	CF61419A-FE99-4501-84F5-3EAFB9324AFB		Positive					Positive	Lumpectomy					31	10				46	0				70	42		Tamoxifen			236B46D8-6A3C-4DDD-8B53-6370C09FA1D6
TCGA-EW-A1P0-01A	YES	NO	YES		55	Left Upper Outer Quadrant		Axillary lymph node dissection alone		117.78.0	Nationwide Children's Hospital	TCGA-EW-A1P0-D29668	82BB1AF4-6610-45A8-BCFE-5A38D177760E	TCGA-EW-A1P0-F29105	14E24F35-F5DD-4CE1-B35A-7E14ED9BFFBB				Positive	3 Point Scale		3 Point Scale		Negative	Modified Radical Mastectomy				NO	31	8		1105	1245	1033	0			1094			YES	Arimidex		90-99%	6F972283-73DD-411F-B003-09BD5DD8EB09		Scheduled Follow-up Submission
TCGA-EW-A1OY-01A					63	Left	Primary Tumor Field	Sentinel node biopsy alone		117.78.0	Nationwide Children's Hospital	TCGA-EW-A1OY-D32268	B36F48F2-F93A-4964-B8B9-7CF74F5CB0B1	TCGA-EW-A1OY-F30950	26FD0127-AD2F-4FAB-B570-B297E9CC4EFD	TCGA-EW-A1OY-R32269	8C92A96B-0D36-494B-A441-16C4148B266C		Positive	3 Point Scale	3+	3 Point Scale		Positive	Lumpectomy			1	YES	31	23			308	180	0				376	341	NO	Paclitaxel		90-99%	3D3881F4-F15F-4B6A-97BC-1214D86145D6		Scheduled Follow-up Submission
TCGA-A8-A07G-01A					65	Right Upper Outer Quadrant	Primary Tumor Field			56.90.0	Nationwide Children's Hospital	TCGA-A8-A07G-D37882	EF6F7284-A441-4DE8-BD6E-C34BC40D261E	TCGA-A8-A07G-F40827	11CBA9E4-00D9-4227-964C-1681DBE988ED	TCGA-A8-A07G-R38188	30302E30-CC2F-48C2-8021-CF4C619A5E21		Positive					Positive	Other					31	2				243	0				212	181		Letrozole			F1CB1AE6-6F1F-4F4A-8A43-17CD8E87445B
TCGA-BH-A0BT-01A					56	Right Upper Inner Quadrant	Primary Tumor Field			96.78.0	Nationwide Children's Hospital	TCGA-BH-A0BT-D59148	857A1D7C-790E-4A2E-9420-9E23B1F2B32F	TCGA-BH-A0BT-F59143	539EDB85-18FF-4D9F-B1C5-F1C962551945	TCGA-BH-A0BT-R59144	9C01B233-7499-4880-BDBF-74AE44ED26D6		Positive					Positive	Other					31	1			139	97	0				227	167	NO	Cytoxan			5C7926DE-165B-45FD-8413-A766667F0B6B
TCGA-BH-A0BT-11A					56	Right Upper Inner Quadrant	Primary Tumor Field			96.78.0	Nationwide Children's Hospital	TCGA-BH-A0BT-D59148	857A1D7C-790E-4A2E-9420-9E23B1F2B32F	TCGA-BH-A0BT-F59143	539EDB85-18FF-4D9F-B1C5-F1C962551945	TCGA-BH-A0BT-R59144	9C01B233-7499-4880-BDBF-74AE44ED26D6		Positive					Positive	Other					31	1			139	97	0				227	167	NO	Cytoxan			5C7926DE-165B-45FD-8413-A766667F0B6B
TCGA-D8-A1XM-01A					57	Right Upper Inner Quadrant	Primary Tumor Field	Sentinel node biopsy alone		124.80.0	Nationwide Children's Hospital			TCGA-D8-A1XM-F29445	581291C6-5F3C-4477-A478-0A083B71FC3A	TCGA-D8-A1XM-R29446	D5715E1F-01E5-428C-BFBF-115F0D3438BB		Positive					Positive	Lumpectomy				NO	31	19					0				93	61	NO		% IHC		3B0CA5D7-6DA4-4B93-B24C-E3D64BD63D85		Scheduled Follow-up Submission
TCGA-AO-A12A-01A					47	Right		Sentinel lymph node biopsy plus axillary dissection		85.85.0	Nationwide Children's Hospital	TCGA-AO-A12A-D5951	6e16923a-f894-4deb-96a0-7b875f5dd9c3	TCGA-AO-A12A-F19418	BFC6614A-A948-450E-AFF8-2973C401CDF9										Modified Radical Mastectomy				YES	31	12			112	67	0							Cyclophosphamide			13F11623-6E0C-446B-A210-A73E6FD1F735		Scheduled Follow-up Submission
TCGA-BH-A0HU-01A					52	Right	Primary Tumor Field	Sentinel node biopsy alone		56.90.0	Nationwide Children's Hospital	TCGA-BH-A0HU-D4802	5F867E23-30D8-48D8-B2D0-B005C681645F	TCGA-BH-A0HU-F4813	40F5F2C3-261E-4B28-ACD9-B4999AFB0205	TCGA-BH-A0HU-R4804	3BA2AF28-AFDF-46E2-A50D-AB7322DF428C								Other			1	NO	31	16			110	47	0				196	155		Cyclophosphamide			6BF0966E-A843-451C-970F-0DB45175F408
TCGA-AN-A0XV-01A					67	Right Upper Outer Quadrant		Axillary lymph node dissection alone		74.87.0	Nationwide Children's Hospital			TCGA-AN-A0XV-F68962	0DB9CDF6-70F8-4923-AF76-D187338FB3AE				Positive		1+	3 Point Scale		Positive					NO	31	23					0						NO		dextran coated charcoal	90-99%	9BB5D462-CD02-45A4-9D4F-00C8AFFCF1E0
TCGA-E2-A109-01A					64	Right Upper Outer Quadrant		Sentinel node biopsy alone		80.83.0	Nationwide Children's Hospital	TCGA-E2-A109-D7767	db4b5ad5-5f00-43e8-8a2c-e32766f985ff	TCGA-E2-A109-F17418	52DADCDC-5F66-4C71-8D5F-3BCE69F19291				Positive					Negative	Simple Mastectomy				NO	31	9			734	699	0							Femara	Allred score 5+3=8		28CC9233-E260-407D-AEF5-5AA71F93B8E0		Scheduled Follow-up Submission
TCGA-AC-A2QI-01A					76	Right	Primary Tumor Field	Sentinel node biopsy alone		185.69.0	Nationwide Children's Hospital	TCGA-AC-A2QI-D57051	ED0E149B-307C-4202-9AD7-09B21CE8FAB9	TCGA-AC-A2QI-F57047	6AA0381B-1A09-4E7E-A968-8065C44EB313	TCGA-AC-A2QI-R57048	67D9DBB7-C7EE-49D0-9D87-3DA5AD405CFF		Positive					Negative	Other					31	28			275	100	0				355	309	NO	Methotrexate		90-99%	FD0F7151-7305-4973-95B3-B0CB8661E372
TCGA-E9-A54Y-01A					63	Right		Axillary lymph node dissection alone		271.56.0	Nationwide Children's Hospital			TCGA-E9-A54Y-F51391	AAE29C65-F5ED-4CC0-BF9C-810CADD3AC3E				Positive		3+			Positive	Modified Radical Mastectomy				NO	31	23					0									90-99%	A395F600-539B-4291-8A2E-38056F412710
TCGA-C8-A131-01A					82	Left		Axillary lymph node dissection alone		85.85.0	Nationwide Children's Hospital	TCGA-C8-A131-D70830	F291DB2B-45ED-4BD2-98A3-63F012802AC3	TCGA-C8-A131-F70827	FD18DE54-343A-43E7-9EA3-010208D98744				Negative					Negative	Other					31	9			57	34	0						NO	Cyclophosphamide			D983713F-044D-43A9-B90F-EA1B1E3EB16B		Scheduled Follow-up Submission
TCGA-E2-A1B5-01A					46	Left	Primary Tumor Field	Sentinel node biopsy alone		96.78.0	Nationwide Children's Hospital	TCGA-E2-A1B5-D19408	EE248DCA-EF7B-4120-BC49-86460A2BD750	TCGA-E2-A1B5-F19393	C39FB1AF-80F5-4372-B7A6-02C6E902D4DB	TCGA-E2-A1B5-R19413	AA902F8D-0E4A-40C2-BE07-BED2DD67E7DC		Positive					Positive	Lumpectomy			1	NO	31	8				190	0				174	130	NO	tamoxifen	Allred score 5+3 = 8		86BF8D88-E873-4C59-8E75-434275A7F2BD		Scheduled Follow-up Submission
TCGA-E2-A1B5-11A					46	Left	Primary Tumor Field	Sentinel node biopsy alone		96.78.0	Nationwide Children's Hospital	TCGA-E2-A1B5-D19408	EE248DCA-EF7B-4120-BC49-86460A2BD750	TCGA-E2-A1B5-F19393	C39FB1AF-80F5-4372-B7A6-02C6E902D4DB	TCGA-E2-A1B5-R19413	AA902F8D-0E4A-40C2-BE07-BED2DD67E7DC		Positive					Positive	Lumpectomy			1	NO	31	8				190	0				174	130	NO	tamoxifen	Allred score 5+3 = 8		86BF8D88-E873-4C59-8E75-434275A7F2BD		Scheduled Follow-up Submission
TCGA-A2-A3KC-01A					55	Right Lower Outer Quadrant		Sentinel lymph node biopsy plus axillary dissection		202.69.0	Nationwide Children's Hospital	TCGA-A2-A3KC-D59209	7D787BBB-1268-4E08-9C9E-BFA413D22B04	TCGA-A2-A3KC-F37340	6468BE4A-4E05-4B7F-93C7-642E6C1FD9E5	TCGA-A2-A3KC-R30129	D4342F05-5278-45FA-BC38-987E587E740C		Positive	3 Point Scale	3+	3 Point Scale		Positive	Simple Mastectomy			1	NO	31	3				1102	0						NO	Arimidex		90-99%	B2A72CF0-3CD0-4D3A-9402-7E031ADAAC5F	1.9
TCGA-BH-A0GY-01A	NO	NO	NO	NO	67	Left	Primary Tumor Field	Sentinel lymph node biopsy plus axillary dissection		61.88.0	Nationwide Children's Hospital	TCGA-BH-A0GY-D4692	6C08A79A-E8ED-4073-B385-8D190A48E158	TCGA-BH-A0GY-F4695	426FCA35-2C66-49F8-8A54-D246D2D79D53	TCGA-BH-A0GY-R4694	78B3B214-FA94-42A3-A70B-7FD74250E365								Other			1	NO	31	16				202	0				365	317		Cyotxan			6B85C387-C6DB-4281-82E9-05C0F93C23C2
TCGA-D8-A1X5-01A					81	Right Lower Outer Quadrant	Primary Tumor Field	Axillary lymph node dissection alone		120.76.0	Nationwide Children's Hospital	TCGA-D8-A1X5-D30115	972E329F-848E-4B00-AB12-F25F7C073C6A	TCGA-D8-A1X5-F29934	EB83DACE-75EE-47C9-A706-ED4628EBAC90	TCGA-D8-A1X5-R29936	E2E68231-4608-4580-8B41-5293428ED8EB		Positive					Positive	Modified Radical Mastectomy					31	30				55	0				140	113	NO	Tamoxifen	manual counting		92510AC9-3651-4106-9516-2A85A24B5063		Scheduled Follow-up Submission
TCGA-C8-A134-01A					52	Left		Axillary lymph node dissection alone		85.85.0	Nationwide Children's Hospital	TCGA-C8-A134-D70825	BD0FF962-3C67-4CB2-880F-11E2B2F8EF7F	TCGA-C8-A134-F70822	13F00B89-54AB-41DA-BBD2-02C3D6521CCB				Negative					Negative	Other					31	9			41	38	0							Cyclophosphamide			4660EF27-F90C-4C28-9B2F-9805B8421F02		Scheduled Follow-up Submission
TCGA-BH-A18S-01A					79	Right Lower Inner Quadrant		Sentinel node biopsy alone		93.85.0	Nationwide Children's Hospital								Positive					Positive	Other					31	2					0										63644F9C-DD3B-4703-A765-D117ED4DA25D
TCGA-BH-A18S-11A					79	Right Lower Inner Quadrant		Sentinel node biopsy alone		93.85.0	Nationwide Children's Hospital								Positive					Positive	Other					31	2					0										63644F9C-DD3B-4703-A765-D117ED4DA25D
TCGA-D8-A27K-01A					47	Left Upper Inner Quadrant		Axillary lymph node dissection alone		147.75.0	Nationwide Children's Hospital	TCGA-D8-A27K-D72202	B5F1746D-61A5-4826-81D4-303798C56880	TCGA-D8-A27K-F72201	A434782B-9E68-4CAB-9DC0-41AF7599933F				Positive					Positive	Modified Radical Mastectomy				NO	31	29				49	0						NO	Tamoxifen	manual counting		012FC724-3C8C-44FF-A84F-118F25A8D993		Scheduled Follow-up Submission
TCGA-D8-A27V-01A					62	Right Lower Outer Quadrant		Sentinel node biopsy alone		155.73.0	Nationwide Children's Hospital	TCGA-D8-A27V-D30106	C90BB84D-E867-45CE-BBAF-7A25BE220C0E	TCGA-D8-A27V-F30105	E413E78A-B9CB-4D48-8CA1-3F5C41E8E3B0				Positive					Positive	Simple Mastectomy				NO	31	29				48	0						NO	Tamoxifen	manual counting		D445D87E-7135-4EB9-9E58-3467AFE47383		Scheduled Follow-up Submission
TCGA-BH-A0GZ-01A	NO	NO	NO	NO	62	Left	Primary Tumor Field	Sentinel lymph node biopsy plus axillary dissection		61.88.0	Nationwide Children's Hospital	TCGA-BH-A0GZ-D4691	DF515EB3-0AC1-4BBE-B0F5-D74BBA8B245C	TCGA-BH-A0GZ-F4697	6B3FE8B6-3E78-48C6-8CE0-77EFFD2F5DF5	TCGA-BH-A0GZ-R4693	2C0E7F31-3FAC-443E-BBDB-9DDEF10114BA	Negative							Other			1	NO	31	16				157	0							ARIMIDEX			1346EB55-4FE3-40EE-84D6-5D2AB986F23D
TCGA-LL-A7SZ-01A					49	Left Upper Outer Quadrant	Primary Tumor Field	Axillary lymph node dissection alone		360.42.0	Nationwide Children's Hospital	TCGA-LL-A7SZ-D66976	7B392814-A441-40A9-8A1B-24106473A188	TCGA-LL-A7SZ-F66973	1D00374C-84A6-4DC5-97F4-0C60D6ADA5BE	TCGA-LL-A7SZ-R66975	73EF3361-48B3-4F10-A4CF-137ACCA6B8C8		Positive	3 Point Scale	2+	3 Point Scale		Positive	Other				YES	31	29				237	0				275	239		TAMOXIFEN		90-99%	A1566B55-F244-4FEB-931E-110231616C01
TCGA-AO-A0J6-01A					61	Left	Primary Tumor Field	Sentinel node biopsy alone		56.90.0	Nationwide Children's Hospital	TCGA-AO-A0J6-D3105	a007109f-8d09-47c0-8962-c3fdccc14bd9	TCGA-AO-A0J6-F15479	970D7D07-69A6-4BF8-A92E-04769BB10B85	TCGA-AO-A0J6-R3101	485e54f5-ff71-42b8-a85c-68c5fe3c3f7e								Lumpectomy			1	YES	31	22			116	74	0				273	241		DOXORUBICIN			6621E065-7467-4D63-921D-235428BB6FBF		Scheduled Follow-up Submission
TCGA-D8-A1XL-01A					34	Left Upper Outer Quadrant	Primary Tumor Field	Axillary lymph node dissection alone		124.80.0	Nationwide Children's Hospital	TCGA-D8-A1XL-D29991	A6E0C004-801E-45BB-AC10-CCEC1557F108	TCGA-D8-A1XL-F29990	A52FC449-F807-4D82-AB8E-CDCF9B2484D4	TCGA-D8-A1XL-R29993	0F71B55C-E625-4828-9275-B75E1E186FF7		Positive					Positive	Lumpectomy					31	31			128	65	0				249	211	NO	doxorubicine+cyclophosphamide+tamoxifen	manual counting		C526DD5B-8D04-45D8-A6E2-DE39381FD2EA		Scheduled Follow-up Submission
TCGA-BH-A0BZ-01A					59	Left	Primary Tumor Field			96.78.0	Nationwide Children's Hospital	TCGA-BH-A0BZ-D58691	27F92F87-436A-44BE-A7AE-0AE19498D67C	TCGA-BH-A0BZ-F58683	5A5736DB-EA1E-47C5-8CDB-335A2A0274AD	TCGA-BH-A0BZ-R58688	D22DAA71-0A92-4F4F-A8DC-864A0863B07A		Positive					Positive	Modified Radical Mastectomy					31	21			197	167	0				300	294	NO	Abraxane			CA4C675A-25A5-4D09-A147-8B9FD32D7EF5
TCGA-BH-A0BZ-11A					59	Left	Primary Tumor Field			96.78.0	Nationwide Children's Hospital	TCGA-BH-A0BZ-D58691	27F92F87-436A-44BE-A7AE-0AE19498D67C	TCGA-BH-A0BZ-F58683	5A5736DB-EA1E-47C5-8CDB-335A2A0274AD	TCGA-BH-A0BZ-R58688	D22DAA71-0A92-4F4F-A8DC-864A0863B07A		Positive					Positive	Modified Radical Mastectomy					31	21			197	167	0				300	294	NO	Abraxane			CA4C675A-25A5-4D09-A147-8B9FD32D7EF5
TCGA-OL-A97C-01A					67	Left				379.34.0	Nationwide Children's Hospital			TCGA-OL-A97C-F66330	A92B2964-F02C-4129-A664-4BBB320621E7				Negative					Negative	Simple Mastectomy					31	31					0										DD5476DB-1E38-4C68-B686-25FB8C813333
TCGA-A2-A4RW-01A					49	Right Upper Outer Quadrant		Axillary lymph node dissection alone		271.56.0	Nationwide Children's Hospital			TCGA-A2-A4RW-F59123	33B06046-3374-42DE-8585-2C4E3130E18B				Positive	3 Point Scale	3+	3 Point Scale		Positive	Modified Radical Mastectomy				NO	31	1					0									80-89%	DD6006BD-55AF-49C7-AA46-4F26F2855F5F
TCGA-BH-A209-01A					77	Left Upper Outer Quadrant				136.76.0	Nationwide Children's Hospital								Positive					Positive	Lumpectomy					31	8					0										766B78EC-FC5D-49B5-887E-E9DDB097888D
TCGA-BH-A209-11A					77	Left Upper Outer Quadrant				136.76.0	Nationwide Children's Hospital								Positive					Positive	Lumpectomy					31	8					0										766B78EC-FC5D-49B5-887E-E9DDB097888D
TCGA-GM-A2DB-01A					62	Left Upper Outer Quadrant	Primary Tumor Field	Sentinel node biopsy alone		177.73.0	Nationwide Children's Hospital	TCGA-GM-A2DB-D47163	9DB393BE-D1F8-4423-BE3A-1201B189B8E6	TCGA-GM-A2DB-F47156	5F9BC2B1-50F3-4A6F-9B76-6BE7330FCA84	TCGA-GM-A2DB-R47157	D6AC4D25-3614-447E-8DF4-09A1DBE09817		Negative					Negative	Lumpectomy				YES	31	22			248	181	0				317	271	NO	Cytoxan		<10%	C2491665-9C93-4749-A86B-6C2FA36605D4	1.50
TCGA-B6-A0IP-01A					74	Left Upper Outer Quadrant		Axillary lymph node dissection alone		56.90.0	Nationwide Children's Hospital			TCGA-B6-A0IP-F71501	6C5ADB8C-AC1E-4330-B52D-BD8A8A9B567B				Positive					Positive	Modified Radical Mastectomy				NO	31	26					0								IMAGE ANALYSIS		891FE9E9-D1C5-43B1-AF56-984AB1BC29B7		Scheduled Follow-up Submission
TCGA-BH-A18J-01A					56	Right				93.85.0	Nationwide Children's Hospital								Positive					Positive	Modified Radical Mastectomy					31	8					0						YES			40-49%	CA608ECA-864A-4BFB-A0A3-042749818568
TCGA-BH-A18J-11A					56	Right				93.85.0	Nationwide Children's Hospital								Positive					Positive	Modified Radical Mastectomy					31	8					0						YES			40-49%	CA608ECA-864A-4BFB-A0A3-042749818568
TCGA-A2-A1FX-01A					61	Right Upper Outer Quadrant	Primary Tumor Field	Sentinel lymph node biopsy plus axillary dissection		109.88.0	Nationwide Children's Hospital	TCGA-A2-A1FX-D11802	b78310b5-e2f5-4a69-a170-d5d8b9f9ff96	TCGA-A2-A1FX-F59654	90A36B66-1105-46F9-AB5D-538C89E715E1	TCGA-A2-A1FX-R11813	1afd58fc-db29-4e80-b23d-79c9ce04bff9	Negative	Positive				Mastectomy NOS	Positive	Lumpectomy			1	NO	31	19			155	74	0				231	186	NO	Taxotere		70-79%	2053E208-97DE-4077-9F69-C35C60050563	160	Scheduled Follow-up Submission
TCGA-D8-A1X8-01A					62	Left Lower Outer Quadrant	Primary Tumor Field	Axillary lymph node dissection alone		124.80.0	Nationwide Children's Hospital	TCGA-D8-A1X8-D29429	2392ED50-8D05-4D26-A5D9-F2EA353735BC	TCGA-D8-A1X8-F29428	516F8A4D-F178-4835-BF60-28271EF03221	TCGA-D8-A1X8-R29430	46DDC44D-57CB-439D-BB1D-66ECCB9B9718		Positive		2+	4 Point Scale		Indeterminate	Modified Radical Mastectomy				NO	31	19			182	23	0				239	209	NO	adrimicin+cyclophosphamide	% IHC		EDB48394-49E5-42E8-A60E-EAE4CB81FECC		Scheduled Follow-up Submission
TCGA-D8-A1Y2-01A					71	Right Lower Outer Quadrant		Axillary lymph node dissection alone		136.76.0	Nationwide Children's Hospital	TCGA-D8-A1Y2-D30087	8706F572-AB8C-430F-9761-2AEFA63F375B	TCGA-D8-A1Y2-F30086	960BDA3C-DBB7-4271-AEBE-9C28BF0353A4				Positive					Positive	Modified Radical Mastectomy					31	2				66	0						NO	Tamoxifen	manual counting		92A87A12-677A-49C3-8E98-398E4F8F1BF5		Scheduled Follow-up Submission
TCGA-C8-A273-01A					29	Right Upper Inner Quadrant		Axillary lymph node dissection alone		147.75.0	Nationwide Children's Hospital	TCGA-C8-A273-D70834	34F9559E-95CB-4EBC-9B9D-042337C8811E	TCGA-C8-A273-F70833	E0EA316B-AB47-4A36-8C89-6941291C208B				Positive					Positive	Other					31	9				13	0							Tamoxifen			17AAAB01-C54B-4969-B2B9-8DAD5F7884C6		Scheduled Follow-up Submission
TCGA-AN-A046-01A					68	Right Lower Inner Quadrant		No axillary staging		56.90.0	Nationwide Children's Hospital			TCGA-AN-A046-F68972	F3D0B69A-E347-4523-9C79-5A50FAE60BB6				Positive					Positive	Modified Radical Mastectomy				NO	31	24					0										12CFA6A8-2672-46A4-B446-3A118AEC1CF9
TCGA-AO-A124-01A					38	Left		Sentinel lymph node biopsy plus axillary dissection		80.83.0	Nationwide Children's Hospital	TCGA-AO-A124-D5934	02906cd5-712c-423b-8684-6830cf1a7c7e	TCGA-AO-A124-F19395	4C248C62-B6C3-4222-AA49-AF4679BD9264										Modified Radical Mastectomy				YES	31	12			238	147	0							Paclitaxel			95741C83-8A5C-4AD5-BE28-CE59668F0DE8		Scheduled Follow-up Submission
TCGA-AR-A24Z-01A					57	Left Upper Outer Quadrant		Sentinel lymph node biopsy plus axillary dissection		142.78.0	Nationwide Children's Hospital	TCGA-AR-A24Z-D31667	00E48087-B371-4EB8-93D4-4F9C4E366C28	TCGA-AR-A24Z-F49507	DEBAA1B0-B174-41E1-BAE2-2B5E069C17E3				Positive					Positive	Other				YES	31	2			1912	133	0							Anastrozole			1D2886A1-7FC8-449C-B0EE-7FCBFE70E90C		Scheduled Follow-up Submission
TCGA-E9-A1RA-01A					48	Left Upper Outer Quadrant	Primary Tumor Field	Axillary lymph node dissection alone		120.76.0	Nationwide Children's Hospital	TCGA-E9-A1RA-D30550	AFDB7AB8-943C-45D1-8584-CD15359E6AA5	TCGA-E9-A1RA-F39519	46EE054F-0DB7-413D-9436-92212E47D209	TCGA-E9-A1RA-R30553	2918CA71-A1A5-4A84-A168-C8FF9C942B11											1	NO	31	24			80	10	0				134	93	NO	Cyclophosphamide			564DB554-38E1-4494-9B9A-1A29112AB92D		Scheduled Follow-up Submission
TCGA-A7-A6VY-01A					48	Right Upper Outer Quadrant	Primary Tumor Field	Sentinel lymph node biopsy plus axillary dissection		338.45.0	Nationwide Children's Hospital	TCGA-A7-A6VY-D57231	5D349A3C-E310-48A5-A0E1-248ABE65246D	TCGA-A7-A6VY-F57257	11D83905-3096-497D-A947-096697D1CD40	TCGA-A7-A6VY-R57256	E45FC357-F0D6-4CAF-A745-480BB0BD7C42		Negative					Negative	Lumpectomy				NO	31	6			167	126	0				266	251		Paclitaxel			2CDB2EA2-79C1-4F18-96F9-AB4EB93086EC
TCGA-A8-A076-01A					66	Left Upper Outer Quadrant				47.97.0	Nationwide Children's Hospital	TCGA-A8-A076-D37845	D9725F84-E2BD-4A29-8D96-2689DDF06EB0	TCGA-A8-A076-F40821	AF505FDD-767F-4C9C-8BB2-2C2EB76FC975				Positive					Positive	Other		n/a			31	2				59	0							Anastrozole			0C7E77DE-6D64-4846-A601-B90D5D96CE54
TCGA-D8-A1JM-01A					59	Right Upper Outer Quadrant	Primary Tumor Field	Axillary lymph node dissection alone		109.88.0	Nationwide Children's Hospital	TCGA-D8-A1JM-D20743	D067FC8D-6FF0-4230-B498-599F566005F6	TCGA-D8-A1JM-F20742	F44EA1FB-71B0-4586-9DA1-F4C78A24F0E4	TCGA-D8-A1JM-R20744	DC5F01FD-AD1B-448F-8D51-F62F280E4F7D		Positive					Negative	Modified Radical Mastectomy					31	15			144	39	0				196	171		doxorubicine cyclophosphamide tamoxifen	manual counting	<10%	A0C7AD5C-7B61-4CE0-A86C-1A04BE30A51D		Scheduled Follow-up Submission
TCGA-EW-A1J1-01A					38	Right Upper Inner Quadrant	Primary Tumor Field	Sentinel lymph node biopsy plus axillary dissection		109.88.0	Nationwide Children's Hospital	TCGA-EW-A1J1-D29263	21F38CCA-34D8-4B6E-BFB0-AAF97BD3D511	TCGA-EW-A1J1-F21181	8786A7FF-0211-4148-99E6-B23F288119FF	TCGA-EW-A1J1-R21183	C8A9D52C-E1FF-467E-A30D-5BB45741DE6E		Positive	3 Point Scale	3+	3 Point Scale		Positive	Lumpectomy			1	YES	31	3			176	71	0				254	209	NO	Adriamycin		90-99%	8DAC62A8-23C0-4371-B57A-33DE10CA9393		Scheduled Follow-up Submission
TCGA-D8-A143-01A					51	Left Lower Inner Quadrant		Axillary lymph node dissection alone		85.85.0	Nationwide Children's Hospital	TCGA-D8-A143-D64910	655A6770-6A40-4D7C-9453-094F18309168	TCGA-D8-A143-F13817	A3F360DB-0BEF-4CC5-8175-D859A234AF9E				Negative					Negative	Modified Radical Mastectomy				NO	31	4			172	67	0							cyclophosphamide			37BECC4A-0356-43D5-A672-48A7E1476541		Scheduled Follow-up Submission
TCGA-AR-A0TU-01A					35	Right Lower Outer Quadrant		Sentinel lymph node biopsy plus axillary dissection		74.87.0	Nationwide Children's Hospital	TCGA-AR-A0TU-D19572	EE4C23A8-EDAC-4DE6-9B48-CD0BCB2D9978	TCGA-AR-A0TU-F71735	3BBB4DAF-8684-4AE4-A54B-691A404D0A5D				Negative		0			Negative	Simple Mastectomy				YES	31	30					0							Docetaxel			BF2F5D56-9923-4D03-BF4D-496EA393F6E7		Scheduled Follow-up Submission
TCGA-C8-A1HL-01A					38	Left		Axillary lymph node dissection alone		103.78.0	Nationwide Children's Hospital			TCGA-C8-A1HL-F20266	FC4E3C55-61FA-44EF-83CE-5A7BEEC6B79D				Positive					Negative	Other					31	9					0						NO				CBEF9576-2D65-4428-A977-C603356691DE		Scheduled Follow-up Submission
TCGA-AR-A2LO-01A					46	Left Lower Outer Quadrant	Primary Tumor Field	Sentinel lymph node biopsy plus axillary dissection		177.73.0	Nationwide Children's Hospital	TCGA-AR-A2LO-D37609	6F0A0541-DE11-49E8-914A-2AE90BA4BB39	TCGA-AR-A2LO-F37193	CDD91705-9314-4F46-A3AA-39BD618E4623	TCGA-AR-A2LO-R37257	ADDD5CDF-B239-4A98-AA02-A5DF64C626FF		Positive					Positive	Simple Mastectomy					31	7				903	0				228	196	NO	Anastrozole		70-79%	11C335DD-EE17-4949-8866-755075600DD3
TCGA-BH-A0HW-01A					62	Left	Primary Tumor Field	Sentinel node biopsy alone		56.90.0	Nationwide Children's Hospital	TCGA-BH-A0HW-D4824	3AA2DD0F-A104-4DAD-91CC-8DCC9A958CAD	TCGA-BH-A0HW-F4827	D8AD2E6A-F00C-40B6-A939-5FD2230FABA9	TCGA-BH-A0HW-R4826	4853EDD3-68CE-4693-B548-7B20BF2B0E2F								Other			1	NO	31	16			135	72	0				212	166		Doxorubicin			C3282265-622F-4B99-B9F1-B0BD88FA52F6
TCGA-E9-A5UO-01A					41	Right Upper Outer Quadrant		Axillary lymph node dissection alone		296.54.0	Nationwide Children's Hospital			TCGA-E9-A5UO-F56481	8F3F5F6D-C479-4BDE-AAE8-93351797E3DA										Other				NO	31	10					0										D95DD7EC-5F09-41B1-AF5F-869C18000A76
TCGA-AR-A24N-01A					54	Left Upper Inner Quadrant		Sentinel lymph node biopsy plus axillary dissection		142.78.0	Nationwide Children's Hospital			TCGA-AR-A24N-F49491	7FF92C18-C896-42D4-938C-B0891048B2AE				Positive					Positive	Simple Mastectomy				YES	31	2					0									10-19%	D393DE0F-7AA6-4D58-BC85-C2465E2AABEE		Scheduled Follow-up Submission
TCGA-D8-A1X9-01A					66	Left Lower Outer Quadrant	Primary Tumor Field	Axillary lymph node dissection alone		136.76.0	Nationwide Children's Hospital	TCGA-D8-A1X9-D29432	24E1ACCD-BB3A-4B2A-8E81-18F3452912AA	TCGA-D8-A1X9-F29431	7DFB15F7-F9D2-4987-8254-9C11C8EAD28E	TCGA-D8-A1X9-R29433	104383D3-283E-4D53-AAA0-4A610BB320E7		Positive					Positive	Modified Radical Mastectomy				NO	31	19			320	197	0				350	320	NO	adriamycin+cyclophosphamide	% IHC		B7215E32-FE8A-4033-90F8-2CF543B506EC		Scheduled Follow-up Submission
TCGA-BH-A1F6-01A					51	Left				109.88.0	Nationwide Children's Hospital								Negative					Negative	Modified Radical Mastectomy					31	7					0										C0CF5CBD-0C66-4F11-9AA2-B18F0B04FF1B
TCGA-BH-A1F6-11B					51	Left				109.88.0	Nationwide Children's Hospital								Negative					Negative	Modified Radical Mastectomy					31	7					0										C0CF5CBD-0C66-4F11-9AA2-B18F0B04FF1B
TCGA-A7-A4SE-01A					54	Left		Sentinel node biopsy alone		271.56.0	Nationwide Children's Hospital	TCGA-A7-A4SE-D41893	5FA600E2-E487-4345-A4BE-E4A7AD3738EB	TCGA-A7-A4SE-F50162	EA17641D-048D-48C9-8C6F-24D1888E0196				Negative					Negative	Lumpectomy				YES	31	16			154	105	0							Taxol			58D64591-CA92-4D8D-B8BB-08BE479DCFD6
TCGA-A7-A4SE-11A					54	Left		Sentinel node biopsy alone		271.56.0	Nationwide Children's Hospital	TCGA-A7-A4SE-D41893	5FA600E2-E487-4345-A4BE-E4A7AD3738EB	TCGA-A7-A4SE-F50162	EA17641D-048D-48C9-8C6F-24D1888E0196				Negative					Negative	Lumpectomy				YES	31	16			154	105	0							Taxol			58D64591-CA92-4D8D-B8BB-08BE479DCFD6
TCGA-D8-A27I-01A					58	Right Upper Outer Quadrant	Primary Tumor Field	Axillary lymph node dissection alone		147.75.0	Nationwide Children's Hospital	TCGA-D8-A27I-D29523	94238A97-A6AB-4233-B4FD-23DF34B10383	TCGA-D8-A27I-F29521	174B98DC-4E11-40CA-A49E-0EA85C0029E0	TCGA-D8-A27I-R29524	6D6FB14C-78A7-435A-B30A-9FEC2D491CEC		Positive					Positive	Modified Radical Mastectomy				NO	31	21			160	76	0				212	188	NO	adrimycin+cyclophosphamide	manual counting		981D7F98-B0EE-45FA-9B19-4F4D95B11E9B		Scheduled Follow-up Submission
TCGA-EW-A2FV-01A					39	Left Upper Inner Quadrant	Primary Tumor Field	Axillary lymph node dissection alone		155.73.0	Nationwide Children's Hospital	TCGA-EW-A2FV-D32331	A0359D0A-8675-430D-B394-9D12D035767C	TCGA-EW-A2FV-F42065	54F63442-7AE5-4512-B4D8-853D2F27707A	TCGA-EW-A2FV-R32325	F344EF8E-08CC-4FBD-B10F-ED74909B2EDD	Negative	Positive	3 Point Scale	3+	3 Point Scale		Positive	Modified Radical Mastectomy			1	NO	31	10				268	0				391	329	NO	Goserelin		90-99%	AE62EEAA-9B41-47B4-8824-1D049B6E3309		Scheduled Follow-up Submission
TCGA-E9-A1RI-01A					43	Left Upper Outer Quadrant	Regional site	Axillary lymph node dissection alone		142.78.0	Nationwide Children's Hospital	TCGA-E9-A1RI-D30558	5CC44B06-F81E-4106-A661-6A584D26D12B	TCGA-E9-A1RI-F39443	8690964A-A2FE-410B-9169-9F815F1D0A93	TCGA-E9-A1RI-R30563	FF379776-F8AA-4FCF-B487-555B3031C3FE								Modified Radical Mastectomy			1	NO	31	23			78	32	0				169	137	NO	Cyclophosphamide			14D58FFC-3106-4AFE-9D13-AF5834554715		Scheduled Follow-up Submission
TCGA-E9-A1RI-11A					43	Left Upper Outer Quadrant	Regional site	Axillary lymph node dissection alone		142.78.0	Nationwide Children's Hospital	TCGA-E9-A1RI-D30558	5CC44B06-F81E-4106-A661-6A584D26D12B	TCGA-E9-A1RI-F39443	8690964A-A2FE-410B-9169-9F815F1D0A93	TCGA-E9-A1RI-R30563	FF379776-F8AA-4FCF-B487-555B3031C3FE								Modified Radical Mastectomy			1	NO	31	23			78	32	0				169	137	NO	Cyclophosphamide			14D58FFC-3106-4AFE-9D13-AF5834554715		Scheduled Follow-up Submission
TCGA-B6-A0RS-01A	YES	NO	YES		38	Left		Axillary lymph node dissection alone		72.90.0	Nationwide Children's Hospital			TCGA-B6-A0RS-F13788	3B180A84-15DE-49BC-8E60-E6E97CD0EE18				Negative					Negative	Modified Radical Mastectomy				NO	31	12		2041			0			2041							8C2EDC99-DCE8-44BB-8A2F-9C67C2DC678F		Scheduled Follow-up Submission
TCGA-AC-A3YJ-01A					66	Right		Sentinel node biopsy alone		234.53.0	Nationwide Children's Hospital	TCGA-AC-A3YJ-D60189	DF2F7479-281D-48B4-AB92-DB37A062A978	TCGA-AC-A3YJ-F60187	F91129E1-94BA-4771-B7FA-4F07CA7CB24B				Positive					Positive	Modified Radical Mastectomy				YES	31	31				256	0							Femara			C183D215-1588-43E3-B12F-227F00DAF1D3
TCGA-E2-A108-01A					64	Right Upper Outer Quadrant	Primary Tumor Field			80.83.0	Nationwide Children's Hospital	TCGA-E2-A108-D17915	478FCF8A-98C5-4614-BAF3-0E937EBBF1C5	TCGA-E2-A108-F17423	A33B2D82-E56A-4069-9F2E-D9EED8EEAFBA	TCGA-E2-A108-R17426	3898256B-7709-4AD8-A5F1-C015BE2F2D7C		Positive					Positive	Lumpectomy			2		31	28				95	0				313	307		Cytoxan	Allred score 7 (outside facility)		F435DA88-2E11-4213-8E19-D45C4DFDFCCE		Scheduled Follow-up Submission
TCGA-BH-A0EE-01A	NO	NO	NO	NO	68	Right		Sentinel node biopsy alone		56.90.0	Nationwide Children's Hospital	TCGA-BH-A0EE-D4673	03244A97-6A7C-44C9-86DC-65110C599437	TCGA-BH-A0EE-F4674	6F1C8397-CC8C-47DA-8266-62801060B148										Simple Mastectomy				NO	31	16			411	47	0							Trastuzumab			FC2A8DC2-5D82-442F-ADF7-27E2FB6E8650
TCGA-BH-A0BR-01A					59	Left Lower Inner Quadrant	Primary Tumor Field			85.85.0	Nationwide Children's Hospital			TCGA-BH-A0BR-F61951	9BA76E22-268F-4181-8B35-A67DC8D99EFC	TCGA-BH-A0BR-R61952	630A649B-3586-470C-A97A-7698334CFDA5		Positive					Positive	Other					31	10					0				108	58	NO				46A70312-1BE5-4806-8AC0-1F9AEBAA093A
TCGA-Z7-A8R6-01A					46	Left Upper Outer Quadrant		Sentinel lymph node biopsy plus axillary dissection		379.34.0	Nationwide Children's Hospital	TCGA-Z7-A8R6-D58751	21D2B8CE-9A15-4401-936E-688113BD6678	TCGA-Z7-A8R6-F58752	05FE8EA0-A5C2-4172-8405-A7A30E1E43BF				Positive	4 Point Scale	2+	4 Point Scale		Positive	Lumpectomy				YES	31	9			153	31	0							Taxol			EBD25426-451B-4DDF-9111-9002DDC50DC7
TCGA-AR-A24V-01A					52	Right Upper Outer Quadrant		Sentinel lymph node biopsy plus axillary dissection		142.78.0	Nationwide Children's Hospital	TCGA-AR-A24V-D31625	B34AEFC3-E29F-4CBD-B443-2FEE1DB17665	TCGA-AR-A24V-F49479	5C983853-8BE4-4FDF-8D26-55D45483BB03	TCGA-AR-A24V-R31617	38CC31C7-2363-4444-953E-DDAAFB7098AA		Positive					Positive	Other			1	YES	31	2				1027	0				248	200		Anastrozole		80-89%	9B4886F5-A9C8-4A8F-BF80-49E3FCCD8DDB		Scheduled Follow-up Submission
TCGA-AO-A12H-01A					69	Right		Sentinel node biopsy alone		85.85.0	Nationwide Children's Hospital	TCGA-AO-A12H-D5983	6712f22e-0667-4a78-baed-2051f7f4f05a	TCGA-AO-A12H-F19451	1F5D7F28-3872-40B5-BD20-1E1E6418630D										Simple Mastectomy				YES	31	12				73	0							Arimidex (Anastrozole)			524F1A54-A5D6-429E-9796-60FB95AC7181		Scheduled Follow-up Submission
TCGA-E2-A14O-01A					76	Left Upper Outer Quadrant	Primary Tumor Field	Sentinel lymph node biopsy plus axillary dissection		85.85.0	Nationwide Children's Hospital	TCGA-E2-A14O-D18524	4F298221-2D3F-4F83-8DBB-15844934BAA0	TCGA-E2-A14O-F18521	D8933DE8-A517-4142-9C1D-E9CB01F4932F	TCGA-E2-A14O-R18525	C94602E4-7139-4008-BDC3-9058B35B1E21		Positive					Positive	Modified Radical Mastectomy			1	NO	31	19				53	0				105	68	NO	Arimidex	Allred score 5+3 = 8		B352FC61-A374-42CC-840A-7361A7B3E209		Scheduled Follow-up Submission
TCGA-AR-A24M-01A					38	Left Upper Outer Quadrant	Primary Tumor Field	Sentinel lymph node biopsy plus axillary dissection		142.78.0	Nationwide Children's Hospital	TCGA-AR-A24M-D31350	3AAE3639-A0AE-48F7-81A2-C05BA2ED7782	TCGA-AR-A24M-F49489	F4C44AB5-CE2E-484C-8430-7CE5DC5486F4	TCGA-AR-A24M-R31289	993D8611-83E6-452A-8153-DD07E97149A3		Positive					Positive	Other			1		31	2					0				221	172		Paclitaxel		10-19%	6BA28E46-50AA-46A6-A6FF-5E731705B19C		Scheduled Follow-up Submission
TCGA-A8-A08J-01A					52	Right				47.97.0	Nationwide Children's Hospital			TCGA-A8-A08J-F40846	511A5351-B4EC-4B3F-8F4E-00AFD1613ED1				Positive					Negative	Other					31	2					0										C8A0CA62-59F1-4843-B738-EE8D0C21E6C0
TCGA-D8-A1JA-01A	NO	YES	NO		60	Left Upper Outer Quadrant	Local Recurrence	No axillary staging		109.88.0	Nationwide Children's Hospital	TCGA-D8-A1JA-D65317	954BBBEE-5DA3-43B7-986A-7AA80BA0744F	TCGA-D8-A1JA-F20941	2C26170E-B4E3-428E-A2F1-D91B478E0568	TCGA-D8-A1JA-R20943	1A6BC6F2-1938-46E7-9B84-1C48C8AD6921		Negative					Negative	Modified Radical Mastectomy				NO	31	19			403	340	0			431	472	431		cyclophosphamide	manual counting	<10%	A70880AE-2667-42AC-9CBF-3C479FAF6FEB		Scheduled Follow-up Submission
TCGA-AO-A03T-01A					42	Left		Sentinel lymph node biopsy plus axillary dissection		56.90.0	Nationwide Children's Hospital	TCGA-AO-A03T-D3070	89f9ff00-958d-462b-9439-712c34271b9b	TCGA-AO-A03T-F43476	7BFCB10D-E59D-4D33-92A0-B27E4BE856C9										Modified Radical Mastectomy				NO	31	22				1095	0							LUPRON			4F01784C-4EC2-4739-B440-1E3E15A9AC46		Scheduled Follow-up Submission
TCGA-A8-A0AB-01A					54	Left Upper Outer Quadrant				56.90.0	Nationwide Children's Hospital	TCGA-A8-A0AB-D37908	E3113882-092E-4FBB-8664-055788237872	TCGA-A8-A0AB-F40322	8A60E4E1-747F-4974-9159-CA9BEAA7E445				Positive					Positive	Other					31	16				214	0							Tamoxifen			E48D5EF7-0C9E-4DCA-BA1D-33801CC74D08
TCGA-AO-A03U-01B			NO		31	Left		Sentinel node biopsy alone		80.83.0	Nationwide Children's Hospital	TCGA-AO-A03U-D5989	c1bd6420-c945-476c-afdc-c107a55824c4	TCGA-AO-A03U-F20907	2CBBFF6D-770D-4735-95B5-35ACF9B4A070										Simple Mastectomy				YES	31	24			216	70	0			1614				Methotrexate			C7BE1E8A-52B9-40CC-9C37-E5E1DF360DE4		Scheduled Follow-up Submission
TCGA-AQ-A04J-01A					45	Right Upper Outer Quadrant		Axillary lymph node dissection alone		56.90.0	Nationwide Children's Hospital	TCGA-AQ-A04J-D10111	9826B415-20EE-4140-A2D8-EA39857695D9	TCGA-AQ-A04J-F21740	09FC391F-4113-4C17-8BDA-25158626688E										Simple Mastectomy				NO	31	20			160	118	0							Taxol			273499B7-567B-415D-B32E-03E552808242		Scheduled Follow-up Submission
TCGA-OL-A5D6-01A					71	Left Lower Outer Quadrant		Sentinel node biopsy alone		288.54.0	Nationwide Children's Hospital			TCGA-OL-A5D6-F55437	9B1D5A06-6684-47E7-B1BC-96A9FFE8BA2A				Negative					Negative	Simple Mastectomy					31	10					0										62101BEA-CBBF-49EB-84C2-08DC2E2BF565
TCGA-A2-A0SY-01A					62	Left Upper Outer Quadrant	Primary Tumor Field	Sentinel lymph node biopsy plus axillary dissection		72.90.0	Nationwide Children's Hospital	TCGA-A2-A0SY-D3397	c8d31da4-4cdc-4236-9aff-f8004227981c	TCGA-A2-A0SY-F13943	F8198FBA-D635-4B1C-82E7-56851120B8B6	TCGA-A2-A0SY-R3410	39a5f3b7-96ba-4021-8108-609f4a14186f		Positive					Positive	Modified Radical Mastectomy			1	YES	31	18					0				263	216		Adriamycin		80-89%	5E2C3469-6A5E-4145-BCE5-0DB9FB176339		Scheduled Follow-up Submission
TCGA-AC-A23C-01A					62	Left				142.78.0	Nationwide Children's Hospital	TCGA-AC-A23C-D43236	76E26F66-B516-401D-8620-D4CEF98B70D2	TCGA-AC-A23C-F43235	37E3974F-7A96-4CFC-B4DF-D9C320C34423				Positive					Positive	Modified Radical Mastectomy					31	15			204	77	0						NO	Chemo, NOS		90-99%	D0EEDBFB-2BBA-43FF-ABC7-B98A5C788E74
TCGA-E2-A1LL-01A	NO	NO	NO		73	Left Upper Outer Quadrant	Regional site	Axillary lymph node dissection alone		117.78.0	Nationwide Children's Hospital	TCGA-E2-A1LL-D20617	9EECED51-430D-48E6-9828-E3E8CF095C2A	TCGA-E2-A1LL-F20616	A4E4C69D-7D3F-41E4-AF0A-681E4603326E	TCGA-E2-A1LL-R20619	544DB6E4-9E02-45A2-ACCB-0254D6BB05D9		Negative					Negative	Simple Mastectomy			1	NO	31	17			49	49	0			1303	147	105	NO	Docetaxel	Allred score 0+0 = 0		001E1840-63BE-4025-9226-2B8BE7B5536D		Scheduled Follow-up Submission
TCGA-E2-A1LL-11A	NO	NO	NO		73	Left Upper Outer Quadrant	Regional site	Axillary lymph node dissection alone		117.78.0	Nationwide Children's Hospital	TCGA-E2-A1LL-D20617	9EECED51-430D-48E6-9828-E3E8CF095C2A	TCGA-E2-A1LL-F20616	A4E4C69D-7D3F-41E4-AF0A-681E4603326E	TCGA-E2-A1LL-R20619	544DB6E4-9E02-45A2-ACCB-0254D6BB05D9		Negative					Negative	Simple Mastectomy			1	NO	31	17			49	49	0			1303	147	105	NO	Docetaxel	Allred score 0+0 = 0		001E1840-63BE-4025-9226-2B8BE7B5536D		Scheduled Follow-up Submission
TCGA-PE-A5DD-01A					64	Right Lower Inner Quadrant	Primary Tumor Field			288.54.0	Nationwide Children's Hospital	TCGA-PE-A5DD-D42974	07D66B09-526B-4452-AD8F-860E0674487B	TCGA-PE-A5DD-F66361	0E7AB498-2BA4-460B-896C-866D724D7640	TCGA-PE-A5DD-R66363	7414F39D-4F10-4955-B284-72E857327754		Positive					Negative	Other					31	13				38	0				160	130					82C57C1C-B4E5-4219-9762-6D0DD3B409F3
TCGA-BH-A0DD-01A					58	Right				96.78.0	Nationwide Children's Hospital	TCGA-BH-A0DD-D60388	7421BB29-2783-495B-8C92-73DC7451EEB8	TCGA-BH-A0DD-F60386	125C6661-A8F1-4D50-8E0B-28DD4EC98880				Positive					Positive	Modified Radical Mastectomy					31	9			217	105	0						NO	Carboplatin			39796382-B727-4507-A1C1-C2D7793C45C9
TCGA-BH-A0DD-11A					58	Right				96.78.0	Nationwide Children's Hospital	TCGA-BH-A0DD-D60388	7421BB29-2783-495B-8C92-73DC7451EEB8	TCGA-BH-A0DD-F60386	125C6661-A8F1-4D50-8E0B-28DD4EC98880				Positive					Positive	Modified Radical Mastectomy					31	9			217	105	0						NO	Carboplatin			39796382-B727-4507-A1C1-C2D7793C45C9
TCGA-AN-A0XT-01A					54	Left Upper Outer Quadrant				74.87.0	Nationwide Children's Hospital			TCGA-AN-A0XT-F68960	837B572D-29D8-4983-8304-068372BD90DC				Positive					Negative						31	23					0						NO				51EEE318-7D1F-4008-B144-DCF61A57A8A9
TCGA-E9-A1R2-01A					51	Left Upper Outer Quadrant	Regional site	Axillary lymph node dissection alone		120.76.0	Nationwide Children's Hospital	TCGA-E9-A1R2-D55474	57A9F155-B541-4EFD-8BFE-CBD7447C24D1	TCGA-E9-A1R2-F57941	62EFCDC5-4570-4B6F-A920-8FE3F82173CF	TCGA-E9-A1R2-R56896	850B4523-573A-4F66-A0BA-85E00855505E		Positive					Negative	Lumpectomy				NO	31	31			144	36	0				223	174	NO	Cytoxan		90-99%	B5E1E387-D578-4587-B538-26971FF5A714	74	Scheduled Follow-up Submission
TCGA-A1-A0SF-01A					54	Left		Sentinel lymph node biopsy plus axillary dissection		117.78.0	Nationwide Children's Hospital	TCGA-A1-A0SF-D12156	7D85A866-4109-48A5-A927-6B9F5C64BD59						Positive					Positive	Modified Radical Mastectomy					31	24				1010	0						NO	arimidex		90-99%	CE38555B-297C-4C90-A72D-3F6CB51ECB03
TCGA-AN-A041-01A					29	Left Upper Outer Quadrant				56.90.0	Nationwide Children's Hospital			TCGA-AN-A041-F68971	D69B074B-6C93-4843-B205-6D3254728C90				Positive					Negative						31	24					0						NO				B08C118D-B8A8-4D42-8081-4396747349E2
TCGA-E2-A3DX-01A					43	Right	Regional site	Axillary lymph node dissection alone		202.69.0	Nationwide Children's Hospital	TCGA-E2-A3DX-D35828	53169165-315E-485D-A2BE-FAA021F7BBC2	TCGA-E2-A3DX-F35822	664B0755-6D22-478B-8659-88B17E648B78	TCGA-E2-A3DX-R35829	012E4A45-96F2-4842-A729-363AC3BDF8E8		Positive					Positive	Modified Radical Mastectomy				NO	31	9				280	0				262	218	NO	Tamoxifen			D1BA788A-2685-4C39-93E7-EA08418CA103
TCGA-E9-A3X8-01A					48	Left Upper Outer Quadrant	Regional site	Axillary lymph node dissection alone		234.53.0	Nationwide Children's Hospital	TCGA-E9-A3X8-D41710	05473A78-6AD8-4AFA-A02B-61BFE72F46D4	TCGA-E9-A3X8-F41704	08EF0574-225F-4327-8F2D-B72B71073D9F	TCGA-E9-A3X8-R41711	EB81185F-05C4-4CD7-8DC8-9719C98B2E79		Positive					Positive	Modified Radical Mastectomy				YES	31	26				324	0				78	52	NO	Tamoxifen		20-29%	E9FCDB76-AE8B-4329-B3C6-C0EFC167D635
TCGA-JL-A3YW-01A					49	Left		Axillary lymph node dissection alone		239.55.0	Nationwide Children's Hospital								Positive	3 Point Scale	3+	3 Point Scale		Positive	Modified Radical Mastectomy					31	8					0									30-39%	FB44FE7D-A1FA-4FB9-BECA-A48BB90EDE7B
TCGA-A2-A0YK-01A					61	Left Lower Outer Quadrant		Sentinel node biopsy alone		74.87.0	Nationwide Children's Hospital	TCGA-A2-A0YK-D5845	c5a7f0c7-a217-4ad7-a621-78da30961ddc	TCGA-A2-A0YK-F16750	5352B4DE-D0F2-4460-A22F-4D82A51444FE				Positive					Negative	Simple Mastectomy				YES	31	16			141	78	0							Cytoxan		90-99%	03A16161-246C-4CD7-926F-BDE1AF382C4F		Scheduled Follow-up Submission
TCGA-A7-A0CD-01A					66	Left	Primary Tumor Field	Sentinel node biopsy alone		47.97.0	Nationwide Children's Hospital	TCGA-A7-A0CD-D4373	94451533-8be6-41aa-a175-9eaa6aae7381	TCGA-A7-A0CD-F39827	131C07DA-8E6A-44E7-898D-DEB2E3D91277	TCGA-A7-A0CD-R4383	5258db1e-4a32-4ee1-9be3-24a249424127								Lumpectomy			1	NO	31	4				112	0				74	70		Arimidex			05423247-0E1E-465B-AA79-384EA5C7C552
TCGA-E9-A22D-01A					38	Right Upper Outer Quadrant		Axillary lymph node dissection alone		136.76.0	Nationwide Children's Hospital	TCGA-E9-A22D-D29928	291C8DBC-432A-4B49-BDD4-FEDCC82245C1	TCGA-E9-A22D-F39787	708BFBE6-3708-4A7E-A6BA-1AFC6260F3EC				Positive					Positive	Modified Radical Mastectomy				YES	31	1			189	16	0							5-Fluorouracil		10-19%	3AF37FFA-94F1-4258-9993-F175E6179034		Scheduled Follow-up Submission
TCGA-GM-A2DM-01A					57	Right Lower Outer Quadrant	Primary Tumor Field	Sentinel node biopsy alone		167.74.0	Nationwide Children's Hospital	TCGA-GM-A2DM-D47110	B5B25354-BF47-47EA-B68D-748265329F82	TCGA-GM-A2DM-F47104	3ACB5CDD-7AFC-45D0-9145-0EC2DD8EE8E0	TCGA-GM-A2DM-R47105	8493586C-8C86-4027-959A-2E8975783875		Positive					Positive	Lumpectomy				YES	31	22			772	279	0				273	237	NO	Arimidex		40-49%	E762DD5B-47B4-4955-94DF-FCE397408D55
TCGA-E9-A227-01A					42	Left Upper Outer Quadrant	Primary Tumor Field	Sentinel lymph node biopsy plus axillary dissection		136.76.0	Nationwide Children's Hospital	TCGA-E9-A227-D55476	A7D3378B-00F0-4BCE-9E2F-C2E4045282A9	TCGA-E9-A227-F58571	21BBE5D6-57A3-4D50-927B-D6C087DCDAAA	TCGA-E9-A227-R55477	83F17951-387D-4703-A980-57BB2DCBB075	Negative	Positive		4+		Other	Positive	Lumpectomy	Re-excision of original lumpectomy site			NO	31	29				239	0				245	216	NO	Tamoxifen		90-99%	139FFED9-63ED-4D5B-B043-0CF11DA0DA18		Scheduled Follow-up Submission
TCGA-E9-A22G-01A					47	Left Upper Outer Quadrant		Axillary lymph node dissection alone		136.76.0	Nationwide Children's Hospital	TCGA-E9-A22G-D29940	7E19BC38-8238-4EC8-ABE3-5F5165B0FEBD	TCGA-E9-A22G-F62594	B265DE44-B99C-489D-BD86-D6AE6272402E				Negative					Negative					YES	31	21			136	14	0						NO	Doxorubicin			6A576484-161E-4CE0-AC96-4D62E2CB39D3		Scheduled Follow-up Submission
TCGA-BH-A0DK-01A					49	Left		Sentinel node biopsy alone		61.88.0	Nationwide Children's Hospital	TCGA-BH-A0DK-D4531	F66FFF44-E13B-490E-B862-8317DB185752	TCGA-BH-A0DK-F4532	00ADA7FD-4CEC-4D7C-A86A-BAFE4B35FEE2										Simple Mastectomy				NO	31	16				112	0							TAMOXIFEN			E35E98EE-FCE5-42B9-805D-8E05572B2E64
TCGA-BH-A0DK-11A					49	Left		Sentinel node biopsy alone		61.88.0	Nationwide Children's Hospital	TCGA-BH-A0DK-D4531	F66FFF44-E13B-490E-B862-8317DB185752	TCGA-BH-A0DK-F4532	00ADA7FD-4CEC-4D7C-A86A-BAFE4B35FEE2										Simple Mastectomy				NO	31	16				112	0							TAMOXIFEN			E35E98EE-FCE5-42B9-805D-8E05572B2E64
TCGA-AC-A23H-01A					90	Right Lower Inner Quadrant				136.76.0	Nationwide Children's Hospital			TCGA-AC-A23H-F45572	9E725427-00DE-4C87-ADEE-5B6A3EC1902C				Positive					Negative	Simple Mastectomy					31	17					0						NO			10-19%	F8611BC9-53CA-4F88-8A94-4ACC85ADC069
TCGA-AC-A23H-11A					90	Right Lower Inner Quadrant				136.76.0	Nationwide Children's Hospital			TCGA-AC-A23H-F45572	9E725427-00DE-4C87-ADEE-5B6A3EC1902C				Positive					Negative	Simple Mastectomy					31	17					0						NO			10-19%	F8611BC9-53CA-4F88-8A94-4ACC85ADC069
TCGA-A8-A07O-01A					51	Right Upper Outer Quadrant	Primary Tumor Field			47.97.0	Nationwide Children's Hospital	TCGA-A8-A07O-D37865	FE74A740-3180-4A13-A733-54DDF7212A91	TCGA-A8-A07O-F40831	A8FC8B58-BD10-40C0-BEE5-E0DA7F4431C4	TCGA-A8-A07O-R38184	B6552840-8AC7-4FA4-8CE2-7EAB6774004A		Negative					Negative	Other					31	2			151	61	0				212	182					C35737C4-AD15-4837-88B7-503D63555BE6
TCGA-E2-A574-01A					44	Left	Primary Tumor Field	Sentinel node biopsy alone		305.50.0	Nationwide Children's Hospital	TCGA-E2-A574-D44497	DCC1FD78-D8B4-4CFE-8322-0E57C1F1D14B	TCGA-E2-A574-F67581	4F60D388-7BCF-4844-A47B-E143279BEA01	TCGA-E2-A574-R44492	4F7A8469-49C3-4615-884A-A4068C9C9597		Negative					Negative	Lumpectomy				NO	31	6			162	120	0				246	195		Abraxane	Allred 0 = 0+0		3E60EE07-3F3D-4F7C-9DCC-FEB4E44CF795	2.8
TCGA-C8-A12T-01A					43	Left		Axillary lymph node dissection alone		85.85.0	Nationwide Children's Hospital								Positive					Positive	Other				NO	31	11					0						NO				577F9F52-9750-4E3E-AE38-DFE1D24E796D
TCGA-AC-A2FB-01A					65	Left Upper Inner Quadrant		Sentinel node biopsy alone		155.73.0	Nationwide Children's Hospital	TCGA-AC-A2FB-D45602	E9BB9D9C-C752-4FC4-AA16-B531C23C1BEF	TCGA-AC-A2FB-F45574	64865AFC-B952-4D29-AEA3-BF902B430461				Positive	3 Point Scale	3+	3 Point Scale		Positive	Simple Mastectomy				NO	31	17			895	225	0						NO	Arimidex		90-99%	D73868F7-0257-4751-AF43-F11A1761E33B
TCGA-AC-A2FB-11A					65	Left Upper Inner Quadrant		Sentinel node biopsy alone		155.73.0	Nationwide Children's Hospital	TCGA-AC-A2FB-D45602	E9BB9D9C-C752-4FC4-AA16-B531C23C1BEF	TCGA-AC-A2FB-F45574	64865AFC-B952-4D29-AEA3-BF902B430461				Positive	3 Point Scale	3+	3 Point Scale		Positive	Simple Mastectomy				NO	31	17			895	225	0						NO	Arimidex		90-99%	D73868F7-0257-4751-AF43-F11A1761E33B
TCGA-C8-A135-01A					64	Left		Axillary lymph node dissection alone		85.85.0	Nationwide Children's Hospital	TCGA-C8-A135-D70821	CD8B26E1-2982-4CDF-ACD5-FE6293F7B193	TCGA-C8-A135-F70817	2713E11E-2440-4519-9A50-B0E7F2C3B23E				Negative					Negative	Modified Radical Mastectomy					31	9			51	40	0						NO	Taxol			B230C4CF-AF7A-4E60-B994-15E6B820AAD9		Scheduled Follow-up Submission
TCGA-A2-A1G1-01A					85	Right Upper Outer Quadrant	Primary Tumor Field	Sentinel lymph node biopsy plus axillary dissection		109.88.0	Nationwide Children's Hospital			TCGA-A2-A1G1-F20808	BF8ABE0A-8961-4EC0-9687-21F465824BF8	TCGA-A2-A1G1-R11798	b0a03ce9-a77f-43d8-8c34-8f37099e4531		Negative					Negative	Lumpectomy			1	NO	31	12					0				143	92	NO				A7446FB8-BDB8-4870-92AA-4ABE93794FD5	51	Scheduled Follow-up Submission
TCGA-BH-A1FM-01A					44	Right Upper Outer Quadrant				109.88.0	Nationwide Children's Hospital								Positive					Negative	Modified Radical Mastectomy					31	8					0										8A4457CA-51B3-4F3A-8CF0-CC29D69BCEE4
TCGA-BH-A1FM-11B					44	Right Upper Outer Quadrant				109.88.0	Nationwide Children's Hospital								Positive					Negative	Modified Radical Mastectomy					31	8					0										8A4457CA-51B3-4F3A-8CF0-CC29D69BCEE4
TCGA-BH-A1FJ-01A					66	Right Upper Outer Quadrant				109.88.0	Nationwide Children's Hospital								Negative					Positive	Modified Radical Mastectomy					31	8					0										4E6D2622-2FEB-4B35-B0B2-E58DECE47E1E
TCGA-BH-A1FJ-11B					66	Right Upper Outer Quadrant				109.88.0	Nationwide Children's Hospital								Negative					Positive	Modified Radical Mastectomy					31	8					0										4E6D2622-2FEB-4B35-B0B2-E58DECE47E1E
TCGA-AN-A0FW-01A					67	Left Upper Outer Quadrant		No axillary staging		56.90.0	Nationwide Children's Hospital			TCGA-AN-A0FW-F68966	09AE2056-27E8-4B1D-B3BA-67034B18CFEC				Positive					Indeterminate	Modified Radical Mastectomy				NO	31	24					0										390DF70C-B32A-4FB0-BDC8-A9CBEE10E959
TCGA-E9-A245-01A					47	Left Upper Outer Quadrant		Axillary lymph node dissection alone		147.75.0	Nationwide Children's Hospital	TCGA-E9-A245-D31172	015CA647-3EBD-4950-A3AA-A0672ED5011F	TCGA-E9-A245-F31169	74AC779B-F5F6-466E-8318-6C6459C1609D										Lumpectomy				NO	31	24				20	0						NO	Tamoxifen			1AAD438D-1454-422C-BE8D-C852AC397E1A		Scheduled Follow-up Submission
TCGA-4H-AAAK-01A					50	Left Upper Outer Quadrant		Axillary lymph node dissection alone		379.34.0	Nationwide Children's Hospital	TCGA-4H-AAAK-D68072	A6A3B982-CF4E-4E87-9F53-A31FE7AD6C2E	TCGA-4H-AAAK-F67414	2BC6A238-0838-44AB-9DEA-7A127FF96BEF				Positive	3 Point Scale	2+	3 Point Scale		Positive	Modified Radical Mastectomy				NO	31	13			98	27	0							5-Fluorouracil		60-69%	228DC889-0A5B-4CFA-9457-68A255E2140D
TCGA-A2-A0EW-01A	YES	YES			53	Right Lower Outer Quadrant	Distant site	Sentinel lymph node biopsy plus axillary dissection		85.85.0	Nationwide Children's Hospital	TCGA-A2-A0EW-D59523	9FAAE45E-9014-4CD8-BBBA-F327C60E65D7	TCGA-A2-A0EW-F59511	195DBE0F-C593-40A4-A0EC-3B0CCBD34DE5	TCGA-A2-A0EW-R59515	1208B130-7049-48E8-9340-9D4B26754D03		Positive					Positive	Simple Mastectomy				YES	31	14			1787	1696	0			1353	1480	1466		Doxorubicin Liposome		90-99%	D0E657F1-A2D3-4DCB-BFA5-22C0AD6A97BA		Scheduled Follow-up Submission
TCGA-AR-A24W-01A					55	Right Lower Inner Quadrant		Sentinel lymph node biopsy plus axillary dissection		142.78.0	Nationwide Children's Hospital	TCGA-AR-A24W-D31642	1C382941-469A-4FBC-BBFC-AECC59416F32	TCGA-AR-A24W-F49476	7B6E8320-51FE-49BF-A68A-6AB693D91DD2				Positive					Positive	Other					31	2				345	0							Anastrozole			B9B8C710-8A6D-4EFE-9825-86EABAA15466		Scheduled Follow-up Submission
TCGA-AC-A3W6-01A					90	Right		Sentinel node biopsy alone		227.60.0	Nationwide Children's Hospital			TCGA-AC-A3W6-F57046	533C3FB1-7B9B-41B8-8BC4-63C503E2A3EF				Positive	3 Point Scale	1+	3 Point Scale		Positive	Modified Radical Mastectomy				YES	31	28					0									90-99%	CDB92506-B01A-4DC1-ABC6-21DEDE9608E5
TCGA-GI-A2C9-01A					58	Right	Primary Tumor Field	Sentinel lymph node biopsy plus axillary dissection		216.63.0	Nationwide Children's Hospital	TCGA-GI-A2C9-D21685	EDBFE34C-5F81-4C58-B519-A7D28AB60B38	TCGA-GI-A2C9-F21663	C2067CDA-E620-41E9-9545-34875B29BC1F	TCGA-GI-A2C9-R21683	817932FB-2657-4409-8D5B-35D4DDD5E017		Negative					Negative	Lumpectomy				YES	31	8			3349		0				3342		NO				9862E41A-F5E4-4DCD-87B7-E06833EEEDE5		Scheduled Follow-up Submission
TCGA-GI-A2C9-11A					58	Right	Primary Tumor Field	Sentinel lymph node biopsy plus axillary dissection		216.63.0	Nationwide Children's Hospital	TCGA-GI-A2C9-D21685	EDBFE34C-5F81-4C58-B519-A7D28AB60B38	TCGA-GI-A2C9-F21663	C2067CDA-E620-41E9-9545-34875B29BC1F	TCGA-GI-A2C9-R21683	817932FB-2657-4409-8D5B-35D4DDD5E017		Negative					Negative	Lumpectomy				YES	31	8			3349		0				3342		NO				9862E41A-F5E4-4DCD-87B7-E06833EEEDE5		Scheduled Follow-up Submission
TCGA-A8-A0AD-01A					83	Right Upper Outer Quadrant				61.88.0	Nationwide Children's Hospital	TCGA-A8-A0AD-D37897	246120A5-AB0B-454B-B52D-6055129097FE	TCGA-A8-A0AD-F40321	AA110D07-3B8D-423A-8609-0393506BEC0A				Positive					Positive	Other					31	16				61	0							Tamoxifen			BC1BA89F-401B-44D6-A5ED-493A938DF2EA
TCGA-B6-A0RU-01A			YES		40	Right		Axillary lymph node dissection alone		72.90.0	Nationwide Children's Hospital			TCGA-B6-A0RU-F71565	C76B35D5-C269-4642-994F-7458C733F814				Negative					Negative	Other				NO	31	26		3076			0								Image Analysis		A1F82FCA-669E-4208-A372-78FA2A926355		Scheduled Follow-up Submission
TCGA-A2-A0D4-01A					37	Left	Primary Tumor Field	Axillary lymph node dissection alone		47.97.0	Nationwide Children's Hospital	TCGA-A2-A0D4-D1845	ccf14e19-fbff-4548-b109-e64aeb37f5b7	TCGA-A2-A0D4-F13726	F768A36A-1B8C-45BE-9D50-F05E55C3BF24	TCGA-A2-A0D4-R70745	50296DE4-49F9-46B7-AEAA-C7505915F783		Positive					Positive	Lumpectomy				NO	31	10			99	57	0				251	245		Cytoxan		90-99%	3FDA57D4-30E3-4E03-A465-57DF4A037C23		Scheduled Follow-up Submission
TCGA-A8-A09W-01A					70	Right Upper Inner Quadrant				47.97.0	Nationwide Children's Hospital								Positive					Positive	Other					31	27					0										D21F3136-5700-4972-9C6F-BCC8BE16F8C3
TCGA-AR-A5QQ-01A					68	Right	Primary Tumor Field	Axillary lymph node dissection alone		296.54.0	Nationwide Children's Hospital	TCGA-AR-A5QQ-D43964	64A6D9AB-D9A7-47AE-BB5D-FC484F6E56ED	TCGA-AR-A5QQ-F42734	8318BD8E-9128-4A44-AB63-98E5A2459230	TCGA-AR-A5QQ-R42765	36D43FF0-8472-4D18-9916-39F7D4FAF10C		Negative					Negative	Modified Radical Mastectomy					31	10			143	119	0			301	233			VP-16			4FEC1577-8E64-4CED-9E7B-094951A50B68
TCGA-AN-A0FS-01A					55	Right Lower Outer Quadrant		Axillary lymph node dissection alone		56.90.0	Nationwide Children's Hospital			TCGA-AN-A0FS-F68954	80A52799-160B-4844-83FC-F6D6F06E60C4				Positive		0			Negative	Modified Radical Mastectomy				NO	31	23					0								dextran coated charcoal	90-99%	EE2682B8-21BF-4CDD-8265-5C3157045A47
TCGA-A7-A6VV-01A					51	Right		Sentinel lymph node biopsy plus axillary dissection		338.45.0	Nationwide Children's Hospital	TCGA-A7-A6VV-D57248	52B5F633-7FB7-42E1-A8EC-60B50825FBCF	TCGA-A7-A6VV-F57249	2A10E9C7-16B5-4CDC-8548-D21B927922EE				Negative					Negative	Modified Radical Mastectomy				NO	31	6			266	160	0							Taxotere			E99AB4BF-61E9-4440-B62F-0654E1E41107
TCGA-EW-A6SA-01A					59	Left Lower Inner Quadrant		Sentinel node biopsy alone		334.45.0	Nationwide Children's Hospital								Positive					Negative	Simple Mastectomy				YES	31	27					0									50-59%	5EE28D20-617C-4FA6-B8E8-F6A0F4F5121E
TCGA-A2-A0SV-01A	YES	NO		NO	63	Right	Primary Tumor Field	Axillary lymph node dissection alone		72.90.0	Nationwide Children's Hospital	TCGA-A2-A0SV-D3726	93f9d2f6-5376-40a2-b368-fc89e4e8650c	TCGA-A2-A0SV-F3755	94723553-D507-4FCD-98BB-176F2233F930	TCGA-A2-A0SV-R3727	e12b8a6f-2881-4d70-8abb-c5f2944d4ae7								Simple Mastectomy			1	NO	31	22				304	0				141	108		Xeloda			D5AD6DA8-7508-48F2-B898-5A5D767A0538
TCGA-AR-A2LL-01A					70	Left		Sentinel lymph node biopsy plus axillary dissection		167.74.0	Nationwide Children's Hospital	TCGA-AR-A2LL-D37272	8B4531C7-8D35-45BE-B28C-0497928B42F3	TCGA-AR-A2LL-F35205	7E870DEF-F459-4137-9815-ABFC98FF18DF				Positive					Positive	Simple Mastectomy				YES	31	6			224	54	0						NO	Tamoxifen		70-79%	94F4A314-57B6-4E64-9DFB-68990A2C326E
TCGA-E9-A1N5-01A					45	Left Upper Outer Quadrant		Axillary lymph node dissection alone		120.76.0	Nationwide Children's Hospital	TCGA-E9-A1N5-D30709	4635036F-43AC-41A4-91E0-672BE9D92DA7	TCGA-E9-A1N5-F39765	B4847252-8EFC-42E5-A862-992780803AD3				Positive					Positive					NO	31	1				173	0						NO	Tamoxifen			93211292-9D6C-488C-8E0B-0C7DAAF4C349		Scheduled Follow-up Submission
TCGA-E9-A1N5-11A					45	Left Upper Outer Quadrant		Axillary lymph node dissection alone		120.76.0	Nationwide Children's Hospital	TCGA-E9-A1N5-D30709	4635036F-43AC-41A4-91E0-672BE9D92DA7	TCGA-E9-A1N5-F39765	B4847252-8EFC-42E5-A862-992780803AD3				Positive					Positive					NO	31	1				173	0						NO	Tamoxifen			93211292-9D6C-488C-8E0B-0C7DAAF4C349		Scheduled Follow-up Submission
TCGA-LD-A66U-01A					44	Right Upper Outer Quadrant	Primary Tumor Field	Sentinel lymph node biopsy plus axillary dissection		322.49.0	Nationwide Children's Hospital	TCGA-LD-A66U-D58447	F33118FA-3D18-420A-8F4A-2B5ECD06BE24	TCGA-LD-A66U-F58445	90F609AB-BB7D-47BD-B55F-10F4F655C783	TCGA-LD-A66U-R44783	EF712C6A-231E-4FEA-B371-DFBEF41B049B		Positive	3 Point Scale	3+	3 Point Scale		Positive	Modified Radical Mastectomy				NO	31	10				278	0					231		Tamoxifen		90-99%	42331514-E6B8-4DF5-80A4-73DFE6A02F4C
TCGA-BH-A0B1-01A					66	Right	Primary Tumor Field	Sentinel lymph node biopsy plus axillary dissection		61.88.0	Nationwide Children's Hospital	TCGA-BH-A0B1-D15431	7DBDAF3F-FD88-4F6B-8AD8-B6E6830A8D92	TCGA-BH-A0B1-F15429	555CC286-5677-4A66-8FD4-E7B131D2E99B	TCGA-BH-A0B1-R15434	6CBDF1E7-E2BB-4EEC-9C61-547430A54E0A		Positive		3+			Positive	Modified Radical Mastectomy			1	NO	31	3			232	53	0				343	287		Cytoxan		90-99%	CE5D48DE-CE5D-47B2-91B5-9C25027C8FC6		Scheduled Follow-up Submission
TCGA-BH-A28Q-01A					46	Right				147.75.0	Nationwide Children's Hospital			TCGA-BH-A28Q-F64272	5B9A0C32-1B0D-45AA-BD92-C67CD68D5DD6				Positive					Positive	Modified Radical Mastectomy					31	28					0										DBC12DF6-C4F7-4B9F-A6A6-E400D07F3723
TCGA-A2-A0YL-01A					48	Left Lower Outer Quadrant	Primary Tumor Field	Sentinel lymph node biopsy plus axillary dissection		74.87.0	Nationwide Children's Hospital	TCGA-A2-A0YL-D5817	57d63ce1-4d7f-430f-930c-e6605a768c00	TCGA-A2-A0YL-F59387	1DAD0270-FD03-455C-9A03-28C55A7DC2B7	TCGA-A2-A0YL-R5813	45b399c8-8af8-4a9a-9507-682af704063e		Positive		3+			Positive	Simple Mastectomy			1	YES	31	12				177	0				224	177		Arimidex		70-79%	808B4B8E-5BF6-4E82-B6E5-E8202A862C7F		Scheduled Follow-up Submission
TCGA-A8-A094-01A					75	Left				47.97.0	Nationwide Children's Hospital								Positive					Negative	Other					31	27					0										B440EA32-A0B7-41CC-8FFB-F0499C659DB7
TCGA-B6-A0RO-01A					71	Right		Axillary lymph node dissection alone		72.90.0	Nationwide Children's Hospital			TCGA-B6-A0RO-F13799	9A962820-D315-4506-9994-96C7C5A52C5F				Positive					Positive	Modified Radical Mastectomy				NO	31	12					0								Image Analysis		BE38DF37-7D8A-4677-A0EF-C9A5A7542E0B		Scheduled Follow-up Submission
TCGA-A2-A0EX-01A					46	Left Upper Outer Quadrant		Sentinel node biopsy alone		56.90.0	Nationwide Children's Hospital	TCGA-A2-A0EX-D2010	e8a75fe6-b841-46ea-9bd8-51b5fe21c01e	TCGA-A2-A0EX-F13742	622294E1-0361-4A19-8410-DE5E8A4CB231			Negative					Mastectomy NOS		Lumpectomy				YES	31	10				165	0							Tamoxifen			247F0DB8-F391-4FA7-885D-E1FB9276A681		Scheduled Follow-up Submission
TCGA-D8-A27H-01A					72	Right Upper Outer Quadrant		No axillary staging		147.75.0	Nationwide Children's Hospital	TCGA-D8-A27H-D29537	4AB576A6-1236-4F08-9245-2BA70A7A8F57	TCGA-D8-A27H-F29536	24D385C9-D517-47C8-90B6-128C9B86C4AB				Negative					Negative	Modified Radical Mastectomy				NO	31	22			141	36	0						NO	doxorubicin+ cyclophosphamide			C5A8861E-01F2-4237-BFF3-1A59641F70D7		Scheduled Follow-up Submission
TCGA-E9-A247-01A					59	Left Upper Inner Quadrant	Primary Tumor Field	Axillary lymph node dissection alone		142.78.0	Nationwide Children's Hospital	TCGA-E9-A247-D31208	5A067FB7-4E61-4DD8-9DCF-061185296A15	TCGA-E9-A247-F40240	1B31A774-A7D0-41F4-A4E0-B650129E3C2D	TCGA-E9-A247-R31207	26249F86-F8CF-4233-A328-0F7884EEB5A0											1		31	14				10	0				64	33	NO	Tamoxifen			C4077FD1-7F49-45A3-AB6D-5FA1CB2E84F7		Scheduled Follow-up Submission
TCGA-PL-A8LY-01A					30	Right Upper Outer Quadrant				379.34.0	Nationwide Children's Hospital			TCGA-PL-A8LY-F64851	D22A3C5D-4EAD-4A4B-ACAF-158F43785286															31	17					0										4EC00C7C-4B0E-46B2-BD2F-E04DAB2A67B7
TCGA-A2-A04Y-01A					53	Right Upper Outer Quadrant	Regional site	Sentinel lymph node biopsy plus axillary dissection		56.90.0	Nationwide Children's Hospital	TCGA-A2-A04Y-D2746	227dd2b0-0b22-46bd-95d4-20775978c5dd	TCGA-A2-A04Y-F9330	0CE61CBA-C744-4182-820C-81C33344DFCD	TCGA-A2-A04Y-R70740	8D05878C-2457-487F-8DF3-A4F0B1688D9E								Simple Mastectomy				YES	31	18				372	0				290	251		Arimidex			223BBD86-E900-4D49-B15F-4F3C276E27EA
TCGA-LL-A8F5-01A					61	Right Upper Inner Quadrant	Primary Tumor Field	Sentinel node biopsy alone		372.39.0	Nationwide Children's Hospital	TCGA-LL-A8F5-D66963	7E14293E-E235-410C-AD67-13482C7AEBB9	TCGA-LL-A8F5-F66965	F431BC83-8B10-4B98-8517-31411BC2CC4A	TCGA-LL-A8F5-R66964	492E3E55-5D5B-4E10-AB3F-6B271471D319		Positive	3 Point Scale		3 Point Scale		Negative	Lumpectomy				YES	31	29				315	0				316	282		ARIMIDEX		20-29%	6A29BB37-C7C7-4305-BF36-12BE90E1CFB7
TCGA-E2-A1LE-01A	YES	NO	NO		71	Right Lower Inner Quadrant	Primary Tumor Field	Sentinel lymph node biopsy plus axillary dissection		185.69.0	Nationwide Children's Hospital	TCGA-E2-A1LE-D20660	19196460-368E-41C9-B27F-4DB7C615B079	TCGA-E2-A1LE-F20657	4AB0B560-C397-4945-A69B-2DC2A6437160	TCGA-E2-A1LE-R20665	73C4148D-EEC1-42AD-A3D6-67DE98AE432B		Negative					Negative	Simple Mastectomy			01	NO	31	18			54	54	0			361	146	101	NO	herceptin	Allred score 0+0 = 0		75E0A4A4-E292-4206-9951-BE4CC9149BDD		Scheduled Follow-up Submission
TCGA-E2-A1LE-11A	YES	NO	NO		71	Right Lower Inner Quadrant	Primary Tumor Field	Sentinel lymph node biopsy plus axillary dissection		185.69.0	Nationwide Children's Hospital	TCGA-E2-A1LE-D20660	19196460-368E-41C9-B27F-4DB7C615B079	TCGA-E2-A1LE-F20657	4AB0B560-C397-4945-A69B-2DC2A6437160	TCGA-E2-A1LE-R20665	73C4148D-EEC1-42AD-A3D6-67DE98AE432B		Negative					Negative	Simple Mastectomy			01	NO	31	18			54	54	0			361	146	101	NO	herceptin	Allred score 0+0 = 0		75E0A4A4-E292-4206-9951-BE4CC9149BDD		Scheduled Follow-up Submission
TCGA-EW-A6S9-01A					34	Right Upper Outer Quadrant				338.45.0	Nationwide Children's Hospital			TCGA-EW-A6S9-F71706	873F23EE-D1B9-48B8-B112-C6CE519DD5AF				Positive					Positive	Lumpectomy					31	30					0									50-59%	8B9B873D-ACBE-46EB-BAB8-20A2A262F8B6
TCGA-AN-A0FZ-01A					45	Left Upper Outer Quadrant		No axillary staging		56.90.0	Nationwide Children's Hospital			TCGA-AN-A0FZ-F68969	5E7AC543-2D63-4F9A-95A9-9F1AA3C5B8A0				Positive					Negative	Modified Radical Mastectomy				NO	31	24					0										B4A37ECD-B049-48DE-9F64-6FE2F61A7252
TCGA-BH-A0WA-01A					82	Right Upper Outer Quadrant		Axillary lymph node dissection alone		74.87.0	Nationwide Children's Hospital			TCGA-BH-A0WA-F34068	B26AA90B-6D51-4807-902F-8E6B2E695140				Negative					Negative	Other					31	29					0										9186C3F6-DE2E-4282-9F4B-4D33ABB2280F		Scheduled Follow-up Submission
TCGA-E2-A1L8-01A					52	Left Upper Outer Quadrant	Regional site	Sentinel lymph node biopsy plus axillary dissection		109.88.0	Nationwide Children's Hospital	TCGA-E2-A1L8-D20580	D86361A9-8F77-4C1D-AF65-1E775A676B4E	TCGA-E2-A1L8-F70018	8F1CA815-127E-49BE-AB1C-538DC9D42ACA	TCGA-E2-A1L8-R20585	FD3CF554-DCE8-4A47-B16B-CFC4D70AF7DA		Positive					Positive	Simple Mastectomy			1	NO	31	9			99	57	0				245	198	NO	Doxorubicin	allred score 5 + 3 = 8		BF54EB2F-1CAA-4642-AF3E-69D14ED6A3D7		Scheduled Follow-up Submission
TCGA-A7-A3IY-01A					71	Right Upper Outer Quadrant	Primary Tumor Field	Sentinel node biopsy alone		216.63.0	Nationwide Children's Hospital	TCGA-A7-A3IY-D33857	C48F9151-4B8D-4590-AE3F-C0FD5C568755	TCGA-A7-A3IY-F33856	BC3680DF-06D0-4445-9DB2-63B4EC299C1C	TCGA-A7-A3IY-R29468	E359F454-990F-4308-983F-6F88ECAB2FF3	Negative	Positive				Lumpectomy	Positive	Lumpectomy			1	NO	31	20				151	0				116	70	NO	Anastrozole		90-99%	31B2045B-5DC1-449A-BB0E-1B69FE0968C6		Scheduled Follow-up Submission
TCGA-B6-A0IE-01A	YES	YES	NO		38	Left		Axillary lymph node dissection alone		56.90.0	Nationwide Children's Hospital			TCGA-B6-A0IE-F12614	9B0D40DC-3C41-4873-8C8E-9B8D06A6EC6E			Negative	Negative					Negative	Other				NO	31	1					0			834					Image Analysis		22E8B91E-4503-4479-B602-48084F1801C2		Scheduled Follow-up Submission
TCGA-BH-A42T-01A					75	Left		Sentinel node biopsy alone		255.56.0	Nationwide Children's Hospital			TCGA-BH-A42T-F61922	94A68C9F-6AE9-4265-8FB9-C05BC75D0B91				Positive					Positive	Simple Mastectomy					31	10					0										11E986FA-A576-4909-B193-FEE288049551
TCGA-AR-A24U-01A					47	Left Lower Outer Quadrant	Primary Tumor Field	Sentinel lymph node biopsy plus axillary dissection		142.78.0	Nationwide Children's Hospital	TCGA-AR-A24U-D31605	EC9851E1-A6A6-4E59-AAF1-4F25D1B7EA80	TCGA-AR-A24U-F49473	F1F5C96C-885E-427F-8C7C-3E060C82E8A4	TCGA-AR-A24U-R31593	651DA6E4-2E69-451D-AB97-54875022C4F4	Negative	Negative				Mastectomy NOS	Negative	Simple Mastectomy			1		31	2			476	118	0				246	207		Trustuzumab			6DA5ED78-7BE6-4D27-8FAF-9F531B4C1247		Scheduled Follow-up Submission
TCGA-C8-A26W-01A					58	Left Upper Outer Quadrant				147.75.0	Nationwide Children's Hospital	TCGA-C8-A26W-D70798	C80FD468-DF82-483E-8999-EF2110391C96	TCGA-C8-A26W-F70796	0471D048-FE29-4B0C-AC3B-79C58867B410				Positive					Positive	Modified Radical Mastectomy					31	9			193	23	0							Cyclophosphamide			ECF500FC-48A3-46D1-8586-BEF87AE5A493
TCGA-PE-A5DC-01A					72	Right Upper Inner Quadrant				288.54.0	Nationwide Children's Hospital								Positive					Positive						31	30					0										B337965C-6D34-44A6-8010-1FBF36C52082
TCGA-E9-A22B-01A					71	Right Upper Outer Quadrant		Axillary lymph node dissection alone		136.76.0	Nationwide Children's Hospital	TCGA-E9-A22B-D30663	39291295-C212-4E0E-8B9F-08F63DD0A88F	TCGA-E9-A22B-F39786	9E2ED482-C9F8-4510-9A4A-BFA94732EE48				Positive					Negative					YES	31	1				50	0						NO	Tamoxifen		10-19%	E6130BA7-CCEF-4747-8985-DF8B0B6C53FF		Scheduled Follow-up Submission
TCGA-BH-A0H3-01A					46	Left Upper Outer Quadrant	Primary Tumor Field			96.78.0	Nationwide Children's Hospital			TCGA-BH-A0H3-F58599	22CC69F7-3445-4524-A216-80F457933E1A	TCGA-BH-A0H3-R58601	091A7641-7710-4553-8542-90FDEBEFA4AF		Positive					Positive	Other					31	15					0				126	118	NO				95545A75-95CD-486E-9396-7EB74DCD8366
TCGA-BH-A0H3-11A					46	Left Upper Outer Quadrant	Primary Tumor Field			96.78.0	Nationwide Children's Hospital			TCGA-BH-A0H3-F58599	22CC69F7-3445-4524-A216-80F457933E1A	TCGA-BH-A0H3-R58601	091A7641-7710-4553-8542-90FDEBEFA4AF		Positive					Positive	Other					31	15					0				126	118	NO				95545A75-95CD-486E-9396-7EB74DCD8366
TCGA-A8-A07Z-01A					85	Left				47.97.0	Nationwide Children's Hospital	TCGA-A8-A07Z-D37893	7451614E-5AF0-44F4-8C54-978B7E546B5D	TCGA-A8-A07Z-F40836	517EFC98-3027-495D-88B5-D50994A0F178				Positive					Positive	Other					31	2					0							Exemestane			10C119AA-D138-40CB-A08D-3394ACC57180
TCGA-C8-A12V-01A					55	Right		Axillary lymph node dissection alone		85.85.0	Nationwide Children's Hospital			TCGA-C8-A12V-F19095	12E9D7F7-A7A6-4E0F-B152-CE708D83BA6C				Negative					Negative	Other					31	2					0						NO				0CE0D14A-8E68-4DBA-8C70-1FAF55337D3D		Scheduled Follow-up Submission
TCGA-A2-A0SX-01A					48	Left Upper Inner Quadrant	Primary Tumor Field	Sentinel node biopsy alone		72.90.0	Nationwide Children's Hospital	TCGA-A2-A0SX-D14036	634383B8-9F0E-4A8B-84FE-B308540A6F38	TCGA-A2-A0SX-F14037	FD49FD62-003E-47C4-82ED-06FDB0E1CF23	TCGA-A2-A0SX-R4026	b73451cc-daa2-4f73-bf06-517ddecd777f	Negative	Negative				Lumpectomy	Negative	Lumpectomy			1	YES	31	14	1239			1429	0				213			Xeloda			7CCFA996-B717-4141-8C16-5979F61C8E8B		Scheduled Follow-up Submission
TCGA-E9-A5UP-01A					63	Left Upper Outer Quadrant	Regional site	Axillary lymph node dissection alone		296.54.0	Nationwide Children's Hospital	TCGA-E9-A5UP-D57717	DCB3552D-9065-47A4-A78C-6C66D46F8D06	TCGA-E9-A5UP-F57716	E0F63996-79B7-4B36-AAE5-2D10D7A17457	TCGA-E9-A5UP-R57723	5578F153-CCB2-4B38-9BD2-2DF088DD9BC2												NO	31	21				8	0				101	80		Tamoxifen			DBDDAD7A-EA33-4720-9530-62ABB877B3B9
TCGA-C8-A12W-01A					49	Left		Axillary lymph node dissection alone		85.85.0	Nationwide Children's Hospital			TCGA-C8-A12W-F20244	8D4153E6-1D54-4375-9DDB-E9811157BA3E				Positive					Positive	Other					31	9					0										73764E87-6647-4614-A3C5-BE6B84F2759B		Scheduled Follow-up Submission
TCGA-A8-A07W-01A					76	Left Upper Outer Quadrant				47.97.0	Nationwide Children's Hospital	TCGA-A8-A07W-D37853	65DF696C-50FD-4538-824D-29D00F8BAB9A	TCGA-A8-A07W-F40835	4E5B10A4-29A2-4AB4-A3D4-1654295E7FDB				Positive					Positive	Other					31	2					0										E8F69E04-B48A-41E9-9E88-AD8BE24785CD
TCGA-A1-A0SO-01A					67	Right	Regional site	Sentinel lymph node biopsy plus axillary dissection		72.90.0	Nationwide Children's Hospital	TCGA-A1-A0SO-D4449	26D19DA7-541E-4272-8678-F08424C58A63			TCGA-A1-A0SO-R4448	8E839EE0-AABF-432E-B55A-BEAD9FC6A0FC		Negative					Negative	Modified Radical Mastectomy			1		31	6			180	61	0				266	205					DE684936-FEF8-41FF-9A86-8A965E39256C	3.2
TCGA-E2-A15H-01A					38	Right Upper Outer Quadrant		Sentinel node biopsy alone		93.85.0	Nationwide Children's Hospital	TCGA-E2-A15H-D18923	A307776F-37AE-46FE-A3D1-D0E79E1D73A8	TCGA-E2-A15H-F18916	4D718A1D-4604-4750-AC77-52E35846B82E				Positive					Positive	Lumpectomy				NO	31	14				83	0						NO	Herceptin			52AF15E6-FFF3-4DD5-A6C6-3C73B09D258B		Scheduled Follow-up Submission
TCGA-A2-A04V-01A	YES	NO	NO	NO	39	Right		Sentinel node biopsy alone		56.90.0	Nationwide Children's Hospital	TCGA-A2-A04V-D2673	41160c56-81c5-42b7-83b8-cc0018073cac	TCGA-A2-A04V-F10273	8A12F731-0D21-451D-AED9-2677F2356DE2										Simple Mastectomy				YES	31	18				1452	0			1470				EXEMESTANE			E28EEC69-C5C0-492E-8254-6CD19F8536DB
TCGA-A2-A0D1-01A					76	Left Lower Inner Quadrant	Primary Tumor Field	Sentinel node biopsy alone		56.90.0	Nationwide Children's Hospital	TCGA-A2-A0D1-D1836	051e5eee-d34e-496f-bd8f-bdb8f99368a0	TCGA-A2-A0D1-F13733	00808159-4015-4B79-B29A-1BBE85BF2CF2	TCGA-A2-A0D1-R1835	699a1213-cb1d-4281-8197-7c2e6d3ed2d3		Negative					Negative	Lumpectomy			1	YES	31	9			79	79	0				296	252		Taxotere		<10%	6BCDBE2A-2E03-42BE-A260-1B0771BF5EAC		Scheduled Follow-up Submission
TCGA-AC-A3TN-01A					75	Right	Primary Tumor Field	Sentinel lymph node biopsy plus axillary dissection		227.60.0	Nationwide Children's Hospital	TCGA-AC-A3TN-D60192	66521E70-01FD-49E2-B58C-E2A9B05E4F2C	TCGA-AC-A3TN-F60190	DF2E666E-E3D8-430F-8006-49177FDA1884	TCGA-AC-A3TN-R60191	F59786E2-ADDA-4D6F-AD25-572BB54CEA1E		Positive					Positive	Simple Mastectomy					31	31				55	0				144	96	NO	Arimidex		90-99%	48B9F470-BD48-4C62-9F47-7353C7CEA895
TCGA-AO-A1KR-01A					51	Right Upper Inner Quadrant		Sentinel node biopsy alone		117.78.0	Nationwide Children's Hospital	TCGA-AO-A1KR-D21771	BC8E60BC-1325-4D58-8CFC-5647A26B6628	TCGA-AO-A1KR-F21768	72013907-4371-4723-AF90-55C5BC120D64				Negative	4 Point Scale		3 Point Scale		Negative	Simple Mastectomy				YES	31	21			118	76	0						NO	cyclophosphamide			2927E323-DD73-4E58-B088-615D84658568		Scheduled Follow-up Submission
TCGA-B6-A40B-01A					76	Left Upper Outer Quadrant		Sentinel node biopsy alone		239.55.0	Nationwide Children's Hospital			TCGA-B6-A40B-F59661	B9D049E2-D4B2-495F-A644-3E44E9C01D0C				Positive	4 Point Scale	3+	4 Point Scale		Positive	Lumpectomy				YES	31	3					0									90-99%	316A81B1-E584-4933-91F6-A8FF2115CD5F
TCGA-E2-A106-01A					34	Right Upper Outer Quadrant		Sentinel lymph node biopsy plus axillary dissection		80.83.0	Nationwide Children's Hospital	TCGA-E2-A106-D7753	d99bb0ba-6f4a-424f-ad5f-6ec86deec9b5	TCGA-E2-A106-F70397	86E020FA-8617-4BFB-855C-06DA3C5ECFD9			Negative	Positive				Other	Positive	Simple Mastectomy	inner-upper margin re-excision			NO	31	17				883	0							Zoladex		90-99%	CB75199B-0106-4415-B37F-540BC35981EE		Scheduled Follow-up Submission
TCGA-D8-A1XU-01A					56	Left Upper Outer Quadrant		Sentinel node biopsy alone		124.80.0	Nationwide Children's Hospital			TCGA-D8-A1XU-F29456	6F200E00-AAAB-4ED7-A6A8-C21C9B30CF9E			Negative	Positive					Positive	Modified Radical Mastectomy				NO	31	26					0						NO		% IHC		B26704F5-5597-402B-A5E6-DB81F1E58F5A		Scheduled Follow-up Submission
TCGA-EW-A424-01A					51	Right	Primary Tumor Field	Sentinel node biopsy alone		255.56.0	Nationwide Children's Hospital	TCGA-EW-A424-D57613	B56289A2-A358-47AE-A1E7-F9C2A552156B	TCGA-EW-A424-F57612	9802329B-33EB-43F6-810F-6166CE0D1EC3	TCGA-EW-A424-R38939	C62AE9A3-9871-4B68-9F34-E2B47A6E9C35		Positive					Positive	Simple Mastectomy				YES	31	18				154	0				281	231		Arimidex		50-59%	6BEB3AA5-867B-4E01-8F15-16F9B7847914
TCGA-A2-A0CT-01A					71	Right Upper Outer Quadrant		Sentinel node biopsy alone		61.88.0	Nationwide Children's Hospital	TCGA-A2-A0CT-D1974	76a54d5e-e978-4768-b8d6-d25277ef9803	TCGA-A2-A0CT-F13730	E5069DEC-D655-42B1-81A6-4F008FC9EF78				Positive		0			Negative	Simple Mastectomy				YES	31	9			138	75	0							Cytoxan		90-99%	B53D760C-2DD2-404A-86E3-860B633D7DE1		Scheduled Follow-up Submission
TCGA-EW-A1P8-01A			NO		58	Left Upper Outer Quadrant		Sentinel lymph node biopsy plus axillary dissection		117.78.0	Nationwide Children's Hospital	TCGA-EW-A1P8-D29633	BE0E1D18-E1B5-4E37-AD2C-75B257D2F899	TCGA-EW-A1P8-F29121	8F96B637-28EF-44CB-901F-20EA615880C7				Negative	3 Point Scale		3 Point Scale		Negative	Lumpectomy				NO	31	8			140	40	0			207			YES	Cyclophosphamide		<10%	F139D127-2D1E-46A0-ADFC-07CEC71A0317		Scheduled Follow-up Submission
TCGA-BH-A18H-01A					63	Right Upper Outer Quadrant	Primary Tumor Field	Sentinel lymph node biopsy plus axillary dissection		93.85.0	Nationwide Children's Hospital	TCGA-BH-A18H-D59203	8719BC2E-D714-4B56-8035-F3E2D07DD9CF	TCGA-BH-A18H-F59198	975B9460-CA44-4CE3-A700-C1FC9E8C97DE	TCGA-BH-A18H-R59200	874B4EE2-C5FA-4C67-B91A-FB143D18AE49		Positive					Positive	Other				YES	31	2			219	118	0				266	260		Taxotere			B3573084-B17E-48AE-A913-7BE934D2494C
TCGA-E2-A15A-01A					45	Left	Regional site	Sentinel lymph node biopsy plus axillary dissection		93.85.0	Nationwide Children's Hospital	TCGA-E2-A15A-D18929	03F02177-F519-4582-80D5-FB49841CED1B	TCGA-E2-A15A-F18926	89F6BF10-DB74-4BB3-B5DC-B8C065538CDB	TCGA-E2-A15A-R18938	78528A96-4A5C-4ADD-8526-E921E5238F87		Positive					Positive	Simple Mastectomy			1	NO	31	10			89	47	0				222	145	NO	Cyclophosphamide			02DAB906-EB11-46D6-A960-FAE220541924		Scheduled Follow-up Submission
TCGA-E2-A15A-06A					45	Left	Regional site	Sentinel lymph node biopsy plus axillary dissection		93.85.0	Nationwide Children's Hospital	TCGA-E2-A15A-D18929	03F02177-F519-4582-80D5-FB49841CED1B	TCGA-E2-A15A-F18926	89F6BF10-DB74-4BB3-B5DC-B8C065538CDB	TCGA-E2-A15A-R18938	78528A96-4A5C-4ADD-8526-E921E5238F87		Positive					Positive	Simple Mastectomy			1	NO	31	10			89	47	0				222	145	NO	Cyclophosphamide			02DAB906-EB11-46D6-A960-FAE220541924		Scheduled Follow-up Submission
TCGA-BH-A1F5-01A					62	Right				109.88.0	Nationwide Children's Hospital								Positive					Positive						31	7					0										1EC56E53-76C9-4CFB-980C-17A7668C30B6
TCGA-BH-A1F5-11A					62	Right				109.88.0	Nationwide Children's Hospital								Positive					Positive						31	7					0										1EC56E53-76C9-4CFB-980C-17A7668C30B6
TCGA-BH-A1FG-01A					88	Left				109.88.0	Nationwide Children's Hospital								Positive					Positive	Other					31	8					0										1371550E-0E94-4048-A0EB-6C43985B48A1
TCGA-BH-A1FG-11B					88	Left				109.88.0	Nationwide Children's Hospital								Positive					Positive	Other					31	8					0										1371550E-0E94-4048-A0EB-6C43985B48A1
TCGA-BH-A18U-01A					72	Left		Sentinel lymph node biopsy plus axillary dissection		93.85.0	Nationwide Children's Hospital								Positive					Positive	Other					31	2					0										E6F37F90-312A-42D2-A509-EC7E16B60047
TCGA-BH-A18U-11A					72	Left		Sentinel lymph node biopsy plus axillary dissection		93.85.0	Nationwide Children's Hospital								Positive					Positive	Other					31	2					0										E6F37F90-312A-42D2-A509-EC7E16B60047
TCGA-A7-A3IZ-01A					62	Right	Primary Tumor Field	Sentinel lymph node biopsy plus axillary dissection		202.69.0	Nationwide Children's Hospital	TCGA-A7-A3IZ-D34493	D4791F16-F661-488F-9546-AE3B6AC25372	TCGA-A7-A3IZ-F34491	69577EC0-0532-4A9C-BCBA-5A79E096D13B	TCGA-A7-A3IZ-R34492	B45436BD-3C65-4EC5-9C41-1D009B1E0435	Negative	Positive				Other	Negative	Lumpectomy	Reexcision			YES	31	16				124	0				226	181	NO	Anastrozole		90-99%	B075D7A5-73C3-4858-96D8-3B3ED83B3396	3.0
TCGA-E2-A1IO-01A					37	Right	Primary Tumor Field	Sentinel node biopsy alone		117.78.0	Nationwide Children's Hospital	TCGA-E2-A1IO-D20321	07023BDC-054F-4A18-BA92-A01D49FC2F1D	TCGA-E2-A1IO-F70391	E33C2350-FCFD-48B6-9444-E29E22BB64DD	TCGA-E2-A1IO-R20322	F2339939-5A10-4BDB-A1F4-6DBF9094FF35		Positive	3 Point Scale		3 Point Scale		Positive	Lumpectomy			1	NO	31	16				266	0				220	175	NO	Tamoxifen			4CCA162B-4C31-4223-9623-06782B45C2F7		Scheduled Follow-up Submission
TCGA-E2-A1IO-11A					37	Right	Primary Tumor Field	Sentinel node biopsy alone		117.78.0	Nationwide Children's Hospital	TCGA-E2-A1IO-D20321	07023BDC-054F-4A18-BA92-A01D49FC2F1D	TCGA-E2-A1IO-F70391	E33C2350-FCFD-48B6-9444-E29E22BB64DD	TCGA-E2-A1IO-R20322	F2339939-5A10-4BDB-A1F4-6DBF9094FF35		Positive	3 Point Scale		3 Point Scale		Positive	Lumpectomy			1	NO	31	16				266	0				220	175	NO	Tamoxifen			4CCA162B-4C31-4223-9623-06782B45C2F7		Scheduled Follow-up Submission
TCGA-E2-A10B-01A	YES	YES	YES		67	Left Lower Outer Quadrant	Primary Tumor Field	Sentinel lymph node biopsy plus axillary dissection		80.83.0	Nationwide Children's Hospital	TCGA-E2-A10B-D17412	4513E452-531B-4CB3-A85B-9B4267CABF91	TCGA-E2-A10B-F17370	276DD2FD-D528-42EF-A703-FD3CC598295E	TCGA-E2-A10B-R17417	7DB115F8-D3D7-46CF-8652-9C5C37F11FAC		Positive					Positive	Lumpectomy			1	NO	31	19		195	748	657	0			195	413	368		Pemetrexed	Allred score 5+3= 8		536051B9-AE3F-4E57-AFF8-F498D1B68B93		Scheduled Follow-up Submission
TCGA-B6-A0WV-01A					67	Right		Axillary lymph node dissection alone		74.87.0	Nationwide Children's Hospital			TCGA-B6-A0WV-F15732	19EA87A8-6263-4AB4-99A7-F46F9369F416				Positive					Positive	Modified Radical Mastectomy				NO	31	29					0								Image Analysis		31545724-BB85-40A1-82D8-1237BC4AA3F6		Scheduled Follow-up Submission
TCGA-A8-A06O-01A					60	Left				47.97.0	Nationwide Children's Hospital	TCGA-A8-A06O-D37896	C45C3AB5-2102-4DC9-AABA-2E722C048077	TCGA-A8-A06O-F40806	9AAAC44E-7751-40C8-84B7-D95B4899BABF				Positive					Positive	Other					31	1				62	0							Letrozole			0D2D7A09-84C2-460F-8CEE-C5AF855150BE
TCGA-EW-A1P4-01A					43	Left Upper Outer Quadrant	Primary Tumor Field	Sentinel node biopsy alone		117.78.0	Nationwide Children's Hospital	TCGA-EW-A1P4-D29687	79E0A6AE-A364-45A1-9ED5-E0FBDD00DAA9	TCGA-EW-A1P4-F29684	45EAB7C6-BFBF-48EC-B18C-19642B61C70E	TCGA-EW-A1P4-R29685	1B09106F-D19A-436A-AE7E-6DE51BA1A9B4		Negative	3 Point Scale		3 Point Scale		Negative	Simple Mastectomy			1	YES	31	26			144	73	0				263	208	NO	Docetaxel		<10%	EADCA360-993A-45C8-B175-2AAE38F7D009		Scheduled Follow-up Submission
TCGA-E9-A228-01A					58	Right Lower Inner Quadrant		Axillary lymph node dissection alone		136.76.0	Nationwide Children's Hospital	TCGA-E9-A228-D29764	19F31BA2-DE6B-46F0-AADB-37D011E8224C	TCGA-E9-A228-F65804	9B040232-D621-4B8B-9E8A-B5499D08A9B4															31	30				287	0						NO	Tamoxifen			3177C7AF-28D0-4C9D-8BF3-E59FC707EC77		Scheduled Follow-up Submission
TCGA-A8-A084-01A					81	Left	Primary Tumor Field			47.97.0	Nationwide Children's Hospital			TCGA-A8-A084-F40838	F5462E4C-B26A-4A0D-A80C-E8B1595300E0	TCGA-A8-A084-R38151	91333E9B-66B8-4BFE-A799-B12A6394BE74		Positive					Negative	Other					31	2					0										C65B3EEE-3052-4C0B-B192-581C16C3C9BC
TCGA-C8-A8HR-01A					49	Right		Axillary lymph node dissection alone		372.39.0	Nationwide Children's Hospital	TCGA-C8-A8HR-D69799	33674CC5-6A4D-42DB-87A8-270B36FA8974	TCGA-C8-A8HR-F69796	33528C47-968B-492E-B86C-31DC1D52F0ED										Modified Radical Mastectomy				NO	31	20			237	43	0							Cyclophosphamide			B9E02C3E-EB76-42D6-9A28-71C7D83BD0F1
TCGA-AR-A1AS-01A					54	Left Upper Inner Quadrant	Primary Tumor Field	Axillary lymph node dissection alone		96.78.0	Nationwide Children's Hospital	TCGA-AR-A1AS-D22092	31EE0BA4-5B45-4A29-BE1E-D544D6290707	TCGA-AR-A1AS-F49470	86521E70-553E-442A-BB81-F0E66AEFAE1B	TCGA-AR-A1AS-R22090	82211072-5912-45D8-9836-6D27865EF389		Positive					Positive	Other			1		31	2			43	29	0				118	77		Doxorubicin		70-79%	201CCA86-E212-41C6-88F4-951401555AF9		Scheduled Follow-up Submission
TCGA-D8-A27R-01A					41	Right Upper Outer Quadrant	Primary Tumor Field	Axillary lymph node dissection alone		147.75.0	Nationwide Children's Hospital	TCGA-D8-A27R-D29702	8D2A839B-9923-4EDA-9E50-5BDA071574E2	TCGA-D8-A27R-F29700	6A541EC5-15E4-48FD-B3AA-B0EFBE8FDFDB	TCGA-D8-A27R-R29703	9A1612A4-80AF-4413-B95B-768251E6704D		Positive					Positive	Modified Radical Mastectomy				NO	31	28			218	57	0				262	237	NO	adriamycin+cyclophosphamide	manual counting		677E92DD-FFD1-428B-B173-5EE3A7FDC909	polisomy	Scheduled Follow-up Submission
TCGA-AN-A0XP-01A					69	Right Upper Inner Quadrant				74.87.0	Nationwide Children's Hospital			TCGA-AN-A0XP-F68958	158CE98D-2791-4E1C-AC57-0A24BD75BEB7				Positive					Positive						31	23					0						NO				A9252D07-25F5-42EB-806A-59FB93FAE34C
TCGA-LL-A5YN-01A					46	Right Upper Inner Quadrant	Primary Tumor Field	Sentinel node biopsy alone		296.54.0	Nationwide Children's Hospital	TCGA-LL-A5YN-D59363	867990D7-24CC-4A86-A294-79C35DFE9907	TCGA-LL-A5YN-F59362	043E9E03-A7CA-4DA6-BFCA-0FC75F6A5750	TCGA-LL-A5YN-R59326	8260F398-2067-486D-ABC6-787644B80D64		Positive	3 Point Scale	3+	3 Point Scale		Positive	Lumpectomy				NO	31	9				229	0				224	194		tamoxifen citrate		90-99%	36ABF12B-037B-490A-B44B-10AD59B7F623	54
TCGA-AR-A254-01A					50	Left Lower Inner Quadrant	Primary Tumor Field	Sentinel lymph node biopsy plus axillary dissection		142.78.0	Nationwide Children's Hospital	TCGA-AR-A254-D31899	82C6D00C-ABFC-4885-88F3-5A4E67579462	TCGA-AR-A254-F49511	D6FF63CD-5109-4256-84D7-02F8243C8553	TCGA-AR-A254-R31900	967465A7-0A86-4FBD-A554-CA1E36E827D2		Positive					Positive	Other			1		31	2				262	0				291	252		Tamoxifen			B3299C2E-386D-45EC-8BAD-15F407022088		Scheduled Follow-up Submission
TCGA-AN-A0XR-01A					55	Left Upper Outer Quadrant				74.87.0	Nationwide Children's Hospital			TCGA-AN-A0XR-F56951	B7A4A241-84FC-4828-8CEA-3BA465FDF1CA				Positive					Negative						31	23					0						NO				80B671B2-7F1E-4E10-A661-E13FD87E7EA5
TCGA-A2-A1FV-01A					74	Left	Regional site	Sentinel node biopsy alone		109.88.0	Nationwide Children's Hospital	TCGA-A2-A1FV-D12263	4a36ce19-e3bb-4484-a0c0-8c815afa84a7	TCGA-A2-A1FV-F20238	AC3FEC50-CC82-40E1-968F-65B1B6619C0D	TCGA-A2-A1FV-R12267	f0cdeb52-224b-47d4-8e49-4f3783f09429		Positive					Positive	Simple Mastectomy			1	YES	31	9			133	70	0				216	169	NO	Cyclophosphamide		90-99%	73D88F72-4C32-4DF8-9D15-777818D59E95		Scheduled Follow-up Submission
TCGA-BH-A0W5-01A					77	Left	Primary Tumor Field	Sentinel lymph node biopsy plus axillary dissection		74.87.0	Nationwide Children's Hospital	TCGA-BH-A0W5-D34071	985E78AA-4536-424D-A1B5-8510D98A84D5	TCGA-BH-A0W5-F34070	82D27FD8-ED77-4388-9C3F-711EDCEF3A4D	TCGA-BH-A0W5-R34072	38458462-2593-488B-927B-D274D9182D8F		Positive					Positive	Other					31	29			144	22	0				144	113		Arimidex			BD966765-1C20-4513-9EAD-BA5FE0390A07		Scheduled Follow-up Submission
TCGA-A8-A06R-01A					69	Right Upper Outer Quadrant	Primary Tumor Field			47.97.0	Nationwide Children's Hospital	TCGA-A8-A06R-D37828	A8ADA003-4EDE-4F08-BD6D-033E139A8077	TCGA-A8-A06R-F40815	AB298BD7-3CA2-44B2-8FA0-1DB436A3375F	TCGA-A8-A06R-R38172	3F996702-1D58-4178-BBF8-51E62724C215		Positive					Negative	Other		n/a			31	2			334	243	0				212	181		Tamoxifen			74429EEE-F4B6-40DB-BC8F-D0187853C03E
TCGA-E2-A107-01A					54	Right Upper Inner Quadrant	Regional site	Sentinel lymph node biopsy plus axillary dissection		80.83.0	Nationwide Children's Hospital	TCGA-E2-A107-D17818	01B8342F-2262-4BEE-8828-DD3CC79BA416	TCGA-E2-A107-F17173	C7D2518B-F2DE-4B90-93B3-EA2F681E4044	TCGA-E2-A107-R7754	1241840c-6acc-43d3-8ca1-58be8ecb2824		Positive					Negative	Simple Mastectomy			1	NO	31	28			151	109	0				326	279		Doxorubicin	Allred score 5+3=8		E0E55956-4140-4D88-AD9D-E7449140668A		Scheduled Follow-up Submission
TCGA-LD-A7W5-01A					52	Left Upper Outer Quadrant		Axillary lymph node dissection alone		360.42.0	Nationwide Children's Hospital	TCGA-LD-A7W5-D56346	C0C80864-B5AF-43CC-9232-BC05B4141491	TCGA-LD-A7W5-F69184	32C744CB-6C00-4920-9077-111C970D52BA				Positive	3 Point Scale		3 Point Scale		Positive	Lumpectomy				NO	31	30				82	0							Cytoxan		90-99%	358704A8-622E-43AB-B855-D2AE4A5425F8
TCGA-D8-A1JS-01A					77	Right Upper Outer Quadrant		Axillary lymph node dissection alone		109.88.0	Nationwide Children's Hospital	TCGA-D8-A1JS-D14052	8318EC65-2D4F-490D-9C42-264220D999DA	TCGA-D8-A1JS-F14051	07528AAE-783F-405C-92D4-AE19620D76CB				Positive					Positive	Lumpectomy				NO	31	18				14	0							Tamoxifen	manual counting		E3EB48DE-5E90-4C36-BDE8-6CA4DEBA3502		Scheduled Follow-up Submission
TCGA-E2-A10E-01A					64	Left	Regional site	Sentinel lymph node biopsy plus axillary dissection		80.83.0	Nationwide Children's Hospital	TCGA-E2-A10E-D17356	299A38EF-5935-4D67-8EF7-C7BCE9FF5DCC	TCGA-E2-A10E-F17248	B250E415-A582-4263-A230-F81B31F7F5F5	TCGA-E2-A10E-R7734	5ff50f19-2a03-46b9-bc52-f3a402b02e14		Positive					Positive	Simple Mastectomy			1	NO	31	26			123	60	0				218	173		Cyclophosphamide	Allred score 5+3=8		C232CE95-9407-4000-AE4D-94F1066A1059		Scheduled Follow-up Submission
TCGA-OL-A5S0-01A					66	Right	Regional site	Axillary lymph node dissection alone		296.54.0	Nationwide Children's Hospital	TCGA-OL-A5S0-D65266	BFE8B8D7-C0CE-4D2E-A587-DDC39BE732B1	TCGA-OL-A5S0-F56567	5E87825C-A737-4301-8FAD-C577C69C56AF	TCGA-OL-A5S0-R65264	BDA0BB3D-2C0A-4827-898B-070CC5BFA0E9		Positive					Negative	Modified Radical Mastectomy					31	14			228	67	0				202	153		HERCEPTIN		30-39%	4CB3B3DE-93B0-41CA-AC7A-184BCACDEDA4
TCGA-GI-A2C8-01A					63	Right		Sentinel node biopsy alone		147.75.0	Nationwide Children's Hospital	TCGA-GI-A2C8-D33386	8750F85E-D2A1-4936-AE36-C090AA8D373C	TCGA-GI-A2C8-F21661	89C2725E-FFD1-4357-A966-FD0DBFB12860				Positive	3 Point Scale	2+	3 Point Scale		Positive	Modified Radical Mastectomy				NO	31	8			166		0						NO	Taxotere		90-99%	D49799BA-5D3D-4E78-93D4-AB78D2F0EF35		Scheduled Follow-up Submission
TCGA-GI-A2C8-11A					63	Right		Sentinel node biopsy alone		147.75.0	Nationwide Children's Hospital	TCGA-GI-A2C8-D33386	8750F85E-D2A1-4936-AE36-C090AA8D373C	TCGA-GI-A2C8-F21661	89C2725E-FFD1-4357-A966-FD0DBFB12860				Positive	3 Point Scale	2+	3 Point Scale		Positive	Modified Radical Mastectomy				NO	31	8			166		0						NO	Taxotere		90-99%	D49799BA-5D3D-4E78-93D4-AB78D2F0EF35		Scheduled Follow-up Submission
TCGA-AO-A03P-01A			NO		54	Right	Primary Tumor Field	Sentinel lymph node biopsy plus axillary dissection		47.97.0	Nationwide Children's Hospital	TCGA-AO-A03P-D15460	0431F2EF-29FF-4AD2-A3CC-BF47622615EA	TCGA-AO-A03P-F15452	46278B90-E76B-4B39-B3C0-42D6AC1CF690	TCGA-AO-A03P-R3077	880c6fc2-c85f-4ab2-a92c-9cbb2dfd34ab								Lumpectomy			1	YES	31	22			2881	2853	0	2576		1922	141	98		FULVESTRANT			0257A616-439E-4246-A35F-80A6F1A2F47B		Scheduled Follow-up Submission
TCGA-A8-A09D-01A					47	Right Lower Outer Quadrant	Primary Tumor Field			47.97.0	Nationwide Children's Hospital	TCGA-A8-A09D-D37767	3CE1FDD7-6CB8-4FEB-9A0A-D9C352B117AF	TCGA-A8-A09D-F40549	A2B31F29-0E1F-4F7F-B705-1B6F0312A9F4	TCGA-A8-A09D-R38157	31E1897B-65F4-4842-8B8A-B76F8482942E		Positive					Positive	Other		n/a			31	23				1400	0				274	214		Anastrozole			C44EA96F-75AB-4BA9-AA8A-E6F275937A63
TCGA-AR-A24X-01A					52	Right Upper Inner Quadrant		Sentinel lymph node biopsy plus axillary dissection		142.78.0	Nationwide Children's Hospital	TCGA-AR-A24X-D31646	5D4ED2DA-2DBA-474E-911D-6EFAE11A411B	TCGA-AR-A24X-F49505	6283A368-C360-4D7E-B284-5AB8F0FE43D6				Positive					Positive	Simple Mastectomy				YES	31	2			1926	130	0							Tamoxifen		80-89%	C36D7A39-09C9-4BE7-A420-F17C5A882277		Scheduled Follow-up Submission
TCGA-AR-A1AR-01A					50	Left Lower Inner Quadrant		Axillary lymph node dissection alone		103.78.0	Nationwide Children's Hospital	TCGA-AR-A1AR-D21854	7B4BBD98-19AC-4156-B24A-AE9E584860AB	TCGA-AR-A1AR-F21816	A22FFD2C-82FF-4832-A3C3-258EE37920E3	TCGA-AR-A1AR-R21851	3B2FC16E-C838-43CC-A732-D6C5969A0532		Negative					Negative	Lumpectomy			1		31	27			159		0			268	251						BA0E43ED-5032-47D8-9ADB-E4FAB4595920		Scheduled Follow-up Submission
TCGA-E2-A1L7-01A	NO	YES			40	Right Upper Outer Quadrant	Primary Tumor Field	Axillary lymph node dissection alone		117.78.0	Nationwide Children's Hospital	TCGA-E2-A1L7-D20589	B07261AA-1C81-4C97-9D43-2C0E1543ABFF	TCGA-E2-A1L7-F70298	0E0A1363-5109-4CB5-B655-FCBCEF191361	TCGA-E2-A1L7-R70387	D9FCDCF6-AA31-494F-918B-042E492EEDF2		Negative					Negative	Modified Radical Mastectomy				NO	31	16			83	41	0		1662	1619	1735	1694	NO	Doxorubicin	Allred score 1+1 = 2		2D8A29AA-1E4A-4AEB-85D0-123945A7812C		Scheduled Follow-up Submission
TCGA-E2-A1L7-11A	NO	YES			40	Right Upper Outer Quadrant	Primary Tumor Field	Axillary lymph node dissection alone		117.78.0	Nationwide Children's Hospital	TCGA-E2-A1L7-D20589	B07261AA-1C81-4C97-9D43-2C0E1543ABFF	TCGA-E2-A1L7-F70298	0E0A1363-5109-4CB5-B655-FCBCEF191361	TCGA-E2-A1L7-R70387	D9FCDCF6-AA31-494F-918B-042E492EEDF2		Negative					Negative	Modified Radical Mastectomy				NO	31	16			83	41	0		1662	1619	1735	1694	NO	Doxorubicin	Allred score 1+1 = 2		2D8A29AA-1E4A-4AEB-85D0-123945A7812C		Scheduled Follow-up Submission
TCGA-AC-A5EH-01A					76	Left Upper Outer Quadrant	Primary Tumor Field	Axillary lymph node dissection alone		296.54.0	Nationwide Children's Hospital			TCGA-AC-A5EH-F60185	0BF107A0-50A7-481B-957D-E8F1C0A4D8F2	TCGA-AC-A5EH-R60186	982113B3-EE91-4E1A-8D9E-FBE98CA4B6B6		Positive					Negative	Modified Radical Mastectomy				NO	31	31					0				216	163				20-29%	6627F00A-60A3-4DCB-862D-E3891D3E7637
TCGA-GM-A3NW-01A					63	Left Upper Inner Quadrant		Sentinel node biopsy alone		227.60.0	Nationwide Children's Hospital	TCGA-GM-A3NW-D40400	F06F057C-E684-4B61-92FE-F22B0EF9A3F4	TCGA-GM-A3NW-F40398	8B23B0F0-7990-4F02-878A-3D61DF21DB52				Negative					Positive	Simple Mastectomy				YES	31	18			181	65	0						NO	Epirubicin			22BD9AB1-A6FC-43E6-AC70-5C5C1F3284A8	1.57
TCGA-A2-A25D-01A					90	Right Upper Outer Quadrant	Primary Tumor Field	Axillary lymph node dissection alone		147.75.0	Nationwide Children's Hospital	TCGA-A2-A25D-D14497	13453903-A47B-4D8A-9288-9EE9FE596226	TCGA-A2-A25D-F30931	41B3DC6F-0AEF-40AE-966C-285FC8F9D38E	TCGA-A2-A25D-R14500	D849D0F0-0D55-4F6A-80A1-49A9EEDF0C27		Positive					Negative	Lumpectomy			1	NO	31	19				113	0				147	90	NO	Tamoxifen		70-79%	F238DAA8-5B01-464D-8358-A6FD97A8BD9C	118	Scheduled Follow-up Submission
TCGA-EW-A1P6-01A					64	Right Upper Outer Quadrant	Primary Tumor Field	Sentinel lymph node biopsy plus axillary dissection		117.78.0	Nationwide Children's Hospital	TCGA-EW-A1P6-D30268	3A0A588D-DF4B-450F-A1BD-06F255D551B7	TCGA-EW-A1P6-F29114	7A4439F1-4C6D-474E-B2DD-55E519D70AEA	TCGA-EW-A1P6-R30274	0BDDDA09-CD55-4750-91BC-0F28F73E5244		Positive	3 Point Scale	3+	3 Point Scale		Positive	Lumpectomy			1	YES	31	8			205	162	0				386	321	NO	Fluorouracil		90-99%	DAA5D828-1B35-481F-AA26-E19D12704D6D		Scheduled Follow-up Submission
TCGA-E2-A15D-01A					47	Right	Primary Tumor Field	Sentinel node biopsy alone		85.85.0	Nationwide Children's Hospital	TCGA-E2-A15D-D18784	39818837-2CB1-402D-AEE7-456C52833C47	TCGA-E2-A15D-F18783	3C9904FC-1B91-4FBD-B16D-F2FBBAE64A14	TCGA-E2-A15D-R18785	36563FC0-3E99-4312-B812-D3595CDCFEE4		Positive					Positive	Lumpectomy			1	NO	31	9			316	111	0				106	61	NO	Tamoxifen			4D46B08B-5C66-4BA4-B406-5AE49DAA2B9F		Scheduled Follow-up Submission
TCGA-D8-A73X-01A					53	Left Upper Outer Quadrant	Primary Tumor Field	Sentinel node biopsy alone		334.45.0	Nationwide Children's Hospital	TCGA-D8-A73X-D57880	43C74671-DCEB-4C5F-B13C-C3F184FEFDBD	TCGA-D8-A73X-F57879	47682239-B701-418A-AC8C-C0AB10D3F37D	TCGA-D8-A73X-R72196	481C16C4-941C-4E6D-8C08-66A6108AB13F		Positive					Positive	Simple Mastectomy				NO	31	28				12	0				53	41		tamoxifen		70-79%	1ED18E21-F9EA-47CE-B5BB-0BA44EE54C4A
TCGA-AR-A1AU-01A					39	Right Upper Outer Quadrant	Primary Tumor Field	Sentinel lymph node biopsy plus axillary dissection		96.78.0	Nationwide Children's Hospital	TCGA-AR-A1AU-D21871	42C369BB-5B2B-41E6-AFEB-DD07F763415A	TCGA-AR-A1AU-F49472	2EF8415E-95BD-4EEF-9529-267C05B3273E	TCGA-AR-A1AU-R21860	5E3D53C1-AE5A-4CFE-94E9-C0B9F51931A0		Positive					Positive	Other			1		31	2				157	0				202	159		Tamoxifen		70-79%	8BA5ADFB-6FCC-4C8C-8A32-D3E7C7F35C19		Scheduled Follow-up Submission
TCGA-A8-A0A7-01A					57	Right Upper Outer Quadrant				47.97.0	Nationwide Children's Hospital								Negative					Negative	Other					31	27					0										2DFA144A-7359-43C6-AFFA-864774CE35C6
TCGA-A2-A0T2-01A	NO	NO		NO	66	Right	Regional site	Axillary lymph node dissection alone		72.90.0	Nationwide Children's Hospital	TCGA-A2-A0T2-D3707	374f0db8-26b8-4cd4-828d-1250a5a81df3	TCGA-A2-A0T2-F3706	A366E180-A36C-447C-BDDE-931193A02AA4	TCGA-A2-A0T2-R3708	86535c68-8c55-421f-ad89-586c8d68c5ed								Modified Radical Mastectomy			1	NO	31	12			225	105	0				199	179		Xeloda			CAF9DE76-32DA-4288-8EAA-16D9B242BCCA
TCGA-AC-A2QJ-01A	YES	YES			48	Left Lower Outer Quadrant	Regional site	Other (specify)	Sentinel lymph node and axillary lymph node biopsy	185.69.0	Nationwide Children's Hospital	TCGA-AC-A2QJ-D44876	A7788968-8449-4721-9548-BFB6C599C876	TCGA-AC-A2QJ-F44021	3A8D4436-79F0-4371-8E16-9ABB1EC95ECA	TCGA-AC-A2QJ-R44023	8AD664BA-6C40-4CAA-8CB1-F5CDAD9C7202		Negative					Negative	Other				NO	31	28			418	349	0			237	312	299	NO	Faslodex			D7FDBB89-A188-4679-B539-18B14A5483E0
TCGA-AC-A2QJ-11A	YES	YES			48	Left Lower Outer Quadrant	Regional site	Other (specify)	Sentinel lymph node and axillary lymph node biopsy	185.69.0	Nationwide Children's Hospital	TCGA-AC-A2QJ-D44876	A7788968-8449-4721-9548-BFB6C599C876	TCGA-AC-A2QJ-F44021	3A8D4436-79F0-4371-8E16-9ABB1EC95ECA	TCGA-AC-A2QJ-R44023	8AD664BA-6C40-4CAA-8CB1-F5CDAD9C7202		Negative					Negative	Other				NO	31	28			418	349	0			237	312	299	NO	Faslodex			D7FDBB89-A188-4679-B539-18B14A5483E0
TCGA-E2-A10C-01A					54	Left Upper Outer Quadrant	Primary Tumor Field	Sentinel lymph node biopsy plus axillary dissection		80.83.0	Nationwide Children's Hospital	TCGA-E2-A10C-D17854	A35F5E09-22C4-4854-B838-0F4399668114	TCGA-E2-A10C-F17357	19E548DF-F99C-484B-84C4-C93E7FA746C6	TCGA-E2-A10C-R7702	68221d80-766f-4c8b-b59b-029f87ad94d2		Positive					Positive	Lumpectomy			1	NO	31	26			139	95	0				328	279		Adriamycin	Allred score 5+3=8		5E8DDD2C-3C5B-4758-AFED-6CEAA0A972DC		Scheduled Follow-up Submission
TCGA-LL-A440-01A					61	Left Upper Outer Quadrant		Sentinel node biopsy alone		255.56.0	Nationwide Children's Hospital	TCGA-LL-A440-D46390	33BE396B-855F-4092-A53F-628047C5B25B	TCGA-LL-A440-F46387	9524E6CE-345A-422C-963B-8ED916821299				Positive	3 Point Scale	3+	3 Point Scale		Positive	Simple Mastectomy				YES	31	7			123	60	0							TAXOTERE		90-99%	33EFAE8A-BCD1-43DF-A830-D7EFD7979F9A	46
TCGA-5T-A9QA-01A					52	Left	Primary Tumor Field	No axillary staging		379.34.0	Nationwide Children's Hospital	TCGA-5T-A9QA-D66893	DCD07D88-6185-4E6B-B95A-FCBE7B9ECDDB	TCGA-5T-A9QA-F66889	5041DB15-D0C3-4364-8D32-850CD958C0BB	TCGA-5T-A9QA-R66894	C8E7F188-6E0A-469B-9BF2-4432E605A7EE		Positive	3 Point Scale				Negative					NO	31	25			94		0				277	227		Cytoxan		70-79%	B52DB7DE-E91A-42BD-80CE-F9D3528EC97C
TCGA-B6-A0X0-01A					54	Right		Axillary lymph node dissection alone		85.85.0	Nationwide Children's Hospital			TCGA-B6-A0X0-F15710	B50DBB7C-6050-4E27-9FE2-3D444CD297A0				Positive					Positive	Modified Radical Mastectomy				NO	31	29					0								Image Analysis		BBD09323-6F19-4509-977E-DD0BF0AC9E1C		Scheduled Follow-up Submission
TCGA-AO-A0JB-01A					50	Left	Regional site	Axillary lymph node dissection alone		61.88.0	Nationwide Children's Hospital	TCGA-AO-A0JB-D3174	f1f16a87-8aa3-4ab9-8872-f3dba71b6d93	TCGA-AO-A0JB-F15485	4E6D473B-DBDC-4AB0-B7CA-6C8E595DCB23	TCGA-AO-A0JB-R3175	4696646b-a422-4344-a88d-d9e532419e43								Modified Radical Mastectomy			1	NO	31	22				175	0				253	216		TAMOXIFEN			2832A91E-1F89-4AF5-BD3C-20FE93EC025E		Scheduled Follow-up Submission
TCGA-A2-A0EP-01A					56	Right Lower Inner Quadrant		Sentinel node biopsy alone		234.53.0	Nationwide Children's Hospital	TCGA-A2-A0EP-D34482	0E2A204E-622E-437C-ADF2-E2DEA2F32B38	TCGA-A2-A0EP-F42402	DE19DCC9-C5D2-4C47-812D-3EA19E28A675				Positive	3 Point Scale				Negative	Simple Mastectomy				YES	31	18			2461	1959	0							Arimidex		80-89%	4B849F6B-80D8-4D37-82E9-C9E31D9E44CE
TCGA-AC-A3HN-01A					87	Left Upper Inner Quadrant		Sentinel node biopsy alone		202.69.0	Nationwide Children's Hospital			TCGA-AC-A3HN-F65835	3B8F9AB2-2433-441B-B393-4247E781E2F3				Positive	3 Point Scale	1+	3 Point Scale		Positive	Simple Mastectomy				YES	31	30					0						NO			90-99%	A854C5D9-B5E7-4643-BC56-FBD37DD4FB8F
TCGA-C8-A12Y-01A					44	Left		Axillary lymph node dissection alone		93.85.0	Nationwide Children's Hospital			TCGA-C8-A12Y-F70839	BEEE8436-461C-4F8E-B7FC-6960B548AF37										Other					31	9					0						NO				C402FF2A-84C9-4172-97C2-3211E340120C
TCGA-A8-A09E-01A					73	Left Lower Outer Quadrant	Primary Tumor Field			47.97.0	Nationwide Children's Hospital	TCGA-A8-A09E-D37745	312D7C87-4134-4840-A47E-CA2E186B1CEA	TCGA-A8-A09E-F40334	F6B0C0F3-A72D-419B-8361-645F56B72C5A	TCGA-A8-A09E-R38152	1C5F574D-5456-4528-8CC3-DC465F84FBB9		Positive					Positive	Other		n/a			31	17				335	0				91	60		Anastrozole			233DAFE4-7824-4915-86B4-54823E0BF234
TCGA-A1-A0SG-01A					61	Right		Sentinel lymph node biopsy plus axillary dissection		117.78.0	Nationwide Children's Hospital	TCGA-A1-A0SG-D12390	8D77AB37-9AB4-43CE-86A0-AFB9DF77E6FA						Positive					Positive	Lumpectomy					31	31				111	0									90-99%	02EEB858-3995-4854-BF48-9CE9975171AA
TCGA-A8-A0A2-01A					66	Right Lower Outer Quadrant	Primary Tumor Field			56.90.0	Nationwide Children's Hospital	TCGA-A8-A0A2-D37901	3C849DD1-A3D9-4F0A-A1B2-332514713CC6			TCGA-A8-A0A2-R38192	1E9265EA-89C2-4B29-A848-0DA6F4AD95B9		Positive					Positive	Other					31	11				92	0				92	31		Tamoxifen			9EEF76D5-1C4F-4699-85B7-1F8E6C13F7ED
TCGA-D8-A1XC-01A			NO		85	Right Upper Inner Quadrant		Axillary lymph node dissection alone		120.76.0	Nationwide Children's Hospital			TCGA-D8-A1XC-F29439	27296384-E750-4A9E-9214-F7D9E9040B5B				Positive					Positive	Modified Radical Mastectomy				NO	31	26					0						NO		% IHC		D12623C6-B0A4-4A27-AB19-143F69B684FC		Scheduled Follow-up Submission
TCGA-A8-A07E-01A					81	Left Upper Outer Quadrant				56.90.0	Nationwide Children's Hospital	TCGA-A8-A07E-D37761	4C0CE1A6-BDC8-4C9A-8A4B-C562220040B4	TCGA-A8-A07E-F40825	E36B92B8-AA12-4750-B2DC-517C7ABB7C81				Positive					Positive	Other		n/a			31	2				0	0							Letrozole			426F410B-7DFD-4C12-B7C1-8C6D9CD6B291
TCGA-A2-A04P-01A	YES	NO	NO	NO	36	Left	Primary Tumor Field	Axillary lymph node dissection alone		56.90.0	Nationwide Children's Hospital	TCGA-A2-A04P-D2659	2af268e5-309a-4cc6-8239-5fad8fe2c4e1	TCGA-A2-A04P-F71021	4B4F5FA2-A9FE-49A8-914E-F8256897A51A	TCGA-A2-A04P-R2653	8cb52952-9ade-48ce-84fc-1ec9cece1fc5	Positive					Mastectomy NOS		Lumpectomy				NO	31	13			303	242	0			313	237	193		GEMZAR			4EF72F2B-8415-403A-A856-7D9021E2CDBF
TCGA-E2-A14Z-01A			NO		64	Left Upper Outer Quadrant	Distant Recurrence	Sentinel node biopsy alone		85.85.0	Nationwide Children's Hospital	TCGA-E2-A14Z-D18799	8A897AD0-3F9D-48BA-84CA-B26404B7FFBE	TCGA-E2-A14Z-F18790	C99B50BB-89E6-456F-B0E0-2F621948028C	TCGA-E2-A14Z-R18794	75F82406-C52F-4EF9-867B-6D2BA36FEEBF		Positive					Positive	Lumpectomy			2	NO	31	4			266	196	0			188	359	236	NO	Carboplatin	Allred score 5+3 = 8		092CF6E6-560F-48AC-8FBE-994648C1F357		Scheduled Follow-up Submission
TCGA-A7-A26F-01A					55	Left	Primary Tumor Field	Sentinel node biopsy alone		142.78.0	Nationwide Children's Hospital	TCGA-A7-A26F-D15011	52516E85-91DF-4339-92FC-15606CA08875	TCGA-A7-A26F-F38499	29E46924-1FDE-481F-BD36-F129490E2FD3	TCGA-A7-A26F-R29408	1A7DD856-99F0-40D6-90A7-1BA2202515F0	Negative	Negative					Negative	Lumpectomy			1	NO	31	14			140	77	0				224	178	NO	Cytoxan			930C9233-48D6-451A-A723-E71E39778521	1.8	Scheduled Follow-up Submission
TCGA-A7-A26F-01B					55	Left	Primary Tumor Field	Sentinel node biopsy alone		142.78.0	Nationwide Children's Hospital	TCGA-A7-A26F-D15011	52516E85-91DF-4339-92FC-15606CA08875	TCGA-A7-A26F-F38499	29E46924-1FDE-481F-BD36-F129490E2FD3	TCGA-A7-A26F-R29408	1A7DD856-99F0-40D6-90A7-1BA2202515F0	Negative	Negative					Negative	Lumpectomy			1	NO	31	14			140	77	0				224	178	NO	Cytoxan			930C9233-48D6-451A-A723-E71E39778521	1.8	Scheduled Follow-up Submission
TCGA-BH-A42V-01A					41	Left Lower Outer Quadrant	Primary Tumor Field	Sentinel node biopsy alone		255.56.0	Nationwide Children's Hospital			TCGA-BH-A42V-F61941	2027C9E7-9C37-444B-A786-938EFDD802E6	TCGA-BH-A42V-R61942	623AE02D-1141-4C6D-A4E3-FB0DA24B9110	Negative	Positive				Other	Positive	Modified Radical Mastectomy	Reexcision of segmental mastectomy				31	10					0				141	92					497A792B-6ACE-4A4A-A169-DAD8EB16AD2E
TCGA-S3-A6ZF-01A					64	Right Upper Outer Quadrant		Sentinel node biopsy alone		334.45.0	Nationwide Children's Hospital	TCGA-S3-A6ZF-D64005	1F99661D-577D-4D3C-BFF3-6436D7DA50A3	TCGA-S3-A6ZF-F59305	B9F9D3D7-E836-4C18-A8AA-1F7DA4D37DDA				Positive	3 Point Scale		3 Point Scale		Positive	Simple Mastectomy				YES	31	27				278	0							ANASTROZOLE	CAP scoring guideline 2010	90-99%	F84D6B0D-E303-49E0-9150-171DA33EB572	39
TCGA-D8-A145-01A					80	Right		Sentinel lymph node biopsy plus axillary dissection		85.85.0	Nationwide Children's Hospital	TCGA-D8-A145-D13812	9C0F81FC-804B-4F15-901B-D5256B63E8AF	TCGA-D8-A145-F13811	B69A91EE-1BA2-4163-A64D-36753ABD9880				Positive					Positive	Simple Mastectomy				NO	31	4				42	0							Tamoxifen	manual counting		3B830B07-2CFA-4CE6-8B44-AD0A5EE0F40D		Scheduled Follow-up Submission
TCGA-E9-A244-01A					54	Left Upper Outer Quadrant		Axillary lymph node dissection alone		142.78.0	Nationwide Children's Hospital	TCGA-E9-A244-D31168	E07A4B20-C911-4AB0-81F9-1D66E0F74A44	TCGA-E9-A244-F31164	39F4E7E2-641B-4D72-8E4C-8066AAD6A679										Lumpectomy				NO	31	24			16	16	0						NO	Doxorubicin			9B633FF3-379C-441F-B771-34FA0748EE29		Scheduled Follow-up Submission
TCGA-C8-A1HG-01A					50	Right		Axillary lymph node dissection alone		103.78.0	Nationwide Children's Hospital			TCGA-C8-A1HG-F19096	E5B2D364-8B39-452F-9930-E30DA170B55F				Positive					Positive	Other				NO	31	2					0						NO				DE7D8283-2BC4-4492-A6CA-5D5FF6DD2E4B		Scheduled Follow-up Submission
TCGA-E9-A248-01A					51	Right Upper Outer Quadrant		Axillary lymph node dissection alone		142.78.0	Nationwide Children's Hospital	TCGA-E9-A248-D31213	73DBEE28-62F4-469F-B77D-40AD347DBA5B	TCGA-E9-A248-F31211	A4604D3E-8204-4714-8FD3-27CD2CD423D1										Lumpectomy				NO	31	25			59	16	0						NO	Doxorubicin			03EF12BA-1332-4DB1-A7A4-27B0F30C46B5		Scheduled Follow-up Submission
TCGA-B6-A0RT-01A					39	Right		Axillary lymph node dissection alone		72.90.0	Nationwide Children's Hospital			TCGA-B6-A0RT-F13789	1E4F30E1-0F1A-4FD6-A858-B54D79689792				Negative					Negative	Modified Radical Mastectomy				NO	31	12					0								Image Analysis		D4BAB785-1551-4CEF-A9E6-F0ABCBBB0528		Scheduled Follow-up Submission
TCGA-BH-A0BO-01A					54	Left Upper Inner Quadrant	Primary Tumor Field			93.85.0	Nationwide Children's Hospital			TCGA-BH-A0BO-F61949	9BC4BD65-416A-4031-AA01-5C1BAA89DD04	TCGA-BH-A0BO-R61950	ABF66B91-2FC8-47CE-9799-E6CE80FF0818		Positive					Positive	Other					31	10					0				119	72	NO				E075CA90-2B2A-4FDA-922D-CDFA09F30E68
TCGA-BH-A0BO-11A					54	Left Upper Inner Quadrant	Primary Tumor Field			93.85.0	Nationwide Children's Hospital			TCGA-BH-A0BO-F61949	9BC4BD65-416A-4031-AA01-5C1BAA89DD04	TCGA-BH-A0BO-R61950	ABF66B91-2FC8-47CE-9799-E6CE80FF0818		Positive					Positive	Other					31	10					0				119	72	NO				E075CA90-2B2A-4FDA-922D-CDFA09F30E68
TCGA-A2-A1FW-01A					62	Right Upper Outer Quadrant	Primary Tumor Field	Sentinel lymph node biopsy plus axillary dissection		109.88.0	Nationwide Children's Hospital	TCGA-A2-A1FW-D20812	4F2494FD-3934-42BA-8414-FE4FEFF62B75	TCGA-A2-A1FW-F20810	45FA1D4F-ECD9-4962-8D88-C93EFFAFBCD2	TCGA-A2-A1FW-R15272	9FDD44F3-884C-407E-B5B9-D1064D91CDA9		Positive					Negative	Modified Radical Mastectomy			1	NO	31	12				364	0				324	277	NO	Femara		90-99%	8487AFDC-DD1A-457A-9D2D-3C8F7FCDDB45		Scheduled Follow-up Submission
TCGA-BH-A1EW-01A					38	Left Upper Outer Quadrant				103.78.0	Nationwide Children's Hospital								Negative					Negative	Other					31	7					0										00260E9E-683A-4AEA-A02F-AD13D8F366B9
TCGA-BH-A1EW-11B					38	Left Upper Outer Quadrant				103.78.0	Nationwide Children's Hospital								Negative					Negative	Other					31	7					0										00260E9E-683A-4AEA-A02F-AD13D8F366B9
TCGA-E2-A15F-01A					64	Left Upper Outer Quadrant	Primary Tumor Field	Sentinel node biopsy alone		85.85.0	Nationwide Children's Hospital	TCGA-E2-A15F-D18907	1EAC6D1E-0E8F-4AD2-8571-21809FF6F41C	TCGA-E2-A15F-F18906	B97A662C-1E3B-4E86-A42A-E23819047D85	TCGA-E2-A15F-R18908	D9E37765-4428-4C8E-A7D0-6C851A7C95FF		Positive	3 Point Scale	3+	3 Point Scale		Positive	Lumpectomy			1	NO	31	10				87	0				86	42	NO	Arimidex		90-99%	BF087F42-995A-4843-B535-D94A9A23CD11		Scheduled Follow-up Submission
TCGA-BH-A0B8-01A					64	Right	Primary Tumor Field	Sentinel node biopsy alone		61.88.0	Nationwide Children's Hospital	TCGA-BH-A0B8-D15443	00C007B0-1048-4B35-B0C6-48FD9B881A51	TCGA-BH-A0B8-F15442	2CC2206F-9B64-41BB-A290-4AC1379C77B6	TCGA-BH-A0B8-R15444	48351B36-41DF-4E03-839A-F3968397A16A		Positive		3+			Positive	Lumpectomy			1	NO	31	3				114	0				114	63		Arimidex		90-99%	91E2BD51-2C24-4E05-9660-2594BD6DD7E4		Scheduled Follow-up Submission
TCGA-BH-A0B8-11A					64	Right	Primary Tumor Field	Sentinel node biopsy alone		61.88.0	Nationwide Children's Hospital	TCGA-BH-A0B8-D15443	00C007B0-1048-4B35-B0C6-48FD9B881A51	TCGA-BH-A0B8-F15442	2CC2206F-9B64-41BB-A290-4AC1379C77B6	TCGA-BH-A0B8-R15444	48351B36-41DF-4E03-839A-F3968397A16A		Positive		3+			Positive	Lumpectomy			1	NO	31	3				114	0				114	63		Arimidex		90-99%	91E2BD51-2C24-4E05-9660-2594BD6DD7E4		Scheduled Follow-up Submission
TCGA-AC-A2FK-01A					45	Left Upper Outer Quadrant	Primary Tumor Field			167.74.0	Nationwide Children's Hospital	TCGA-AC-A2FK-D66201	67C16321-C0D6-4EE5-AA5C-25C290914D9E	TCGA-AC-A2FK-F66196	DD3AB466-3C36-42BB-8F4A-E288ED7C6078	TCGA-AC-A2FK-R66197	C93A72D1-3D52-4D17-A14F-82E4B3670AE8		Positive					Positive	Modified Radical Mastectomy					31	3			174	51	0				280	243	NO	Taxotere		90-99%	DE9AD8FB-FF4C-425E-93A3-C5474AEE7CC0
TCGA-AC-A2FK-11A					45	Left Upper Outer Quadrant	Primary Tumor Field			167.74.0	Nationwide Children's Hospital	TCGA-AC-A2FK-D66201	67C16321-C0D6-4EE5-AA5C-25C290914D9E	TCGA-AC-A2FK-F66196	DD3AB466-3C36-42BB-8F4A-E288ED7C6078	TCGA-AC-A2FK-R66197	C93A72D1-3D52-4D17-A14F-82E4B3670AE8		Positive					Positive	Modified Radical Mastectomy					31	3			174	51	0				280	243	NO	Taxotere		90-99%	DE9AD8FB-FF4C-425E-93A3-C5474AEE7CC0
TCGA-A7-A6VW-01A					48	Left	Primary Tumor Field	Sentinel node biopsy alone		338.45.0	Nationwide Children's Hospital	TCGA-A7-A6VW-D57254	02D81B38-5418-4F7D-B18B-0AE11DBE806B	TCGA-A7-A6VW-F57227	4E6B8FB6-BAFC-4287-BC6A-AB3BA00294C9	TCGA-A7-A6VW-R57253	75FCD986-D2B7-4F5B-B37A-FE0AF6FC2AC8		Negative					Negative	Lumpectomy				NO	31	6			134	84	0				331	285		Cyclophosphamide			0D645D5A-08CF-447E-A71A-197430F17F45
TCGA-BH-A8G0-01A					54	Left				360.42.0	Nationwide Children's Hospital	TCGA-BH-A8G0-D57781	1554145F-6AD9-4A57-92CC-2C65179DF840	TCGA-BH-A8G0-F64200	10DA390E-2291-419B-8B1D-56CD9274E316				Positive					Positive	Simple Mastectomy					31	27			267	155	0							Cytoxan			A6B42BDE-7695-4322-8115-15CCCB8C2BF0
TCGA-AN-A0AJ-01A					79	Left Upper Outer Quadrant		Axillary lymph node dissection alone		47.97.0	Nationwide Children's Hospital			TCGA-AN-A0AJ-F68941	F68BDA17-ACE3-4591-B611-EC8C99FDBD17				Positive		2+			Positive	Modified Radical Mastectomy				NO	31	23					0								dextran coated charcoal	80-89%	30F6FFB8-35DF-4FC7-8F8D-41A1087CDAD0
TCGA-A2-A1G4-01A					71	Right Lower Outer Quadrant		Axillary lymph node dissection alone		109.88.0	Nationwide Children's Hospital	TCGA-A2-A1G4-D12344	5971ea22-14b8-49be-8ee4-c621e8529ea7	TCGA-A2-A1G4-F20805	05CF4C23-40FE-4F52-B9E0-3BE877BC4F3F				Positive	3 Point Scale	3+	3 Point Scale		Positive	Modified Radical Mastectomy				NO	31	9			185	80	0						NO	Cytoxan		90-99%	2B329A28-1885-45B5-BFE5-C2AD7541DDB4		Scheduled Follow-up Submission
TCGA-A8-A06Y-01A					66	Left Upper Outer Quadrant	Primary Tumor Field			47.97.0	Nationwide Children's Hospital	TCGA-A8-A06Y-D37851	E625C1D0-D92D-46AE-8C5E-BD0D9436E191	TCGA-A8-A06Y-F40819	CAEFEE71-9247-4AAD-80DA-82865D83AC02	TCGA-A8-A06Y-R38178	08A51480-CA83-4DDC-853D-0644DC663604		Positive					Positive	Other					31	2				92	0			791	122	61		Anastrozole			DB265D9E-F372-42D1-A3D9-5CEFE204C35E
TCGA-E2-A15O-01A	YES	NO			89	Left Upper Inner Quadrant		No axillary staging		85.85.0	Nationwide Children's Hospital	TCGA-E2-A15O-D70381	D54F8164-4FDA-4707-A7AE-8057748B100D	TCGA-E2-A15O-F70024	BF01F0BA-CC2C-4473-848A-12B4C360742C				Positive					Positive	Lumpectomy				NO	31	16				1245	0		1230	1210			NO	Femara	Allred score 5+2 = 7		DD3F1136-726D-4B0D-A324-5FF4114AC878		Scheduled Follow-up Submission
TCGA-E9-A2JS-01A	YES	NO	NO		72	Left Upper Outer Quadrant	Regional site	Axillary lymph node dissection alone		167.74.0	Nationwide Children's Hospital	TCGA-E9-A2JS-D55896	43929A44-3CE4-467E-85DC-FCF130402CFB	TCGA-E9-A2JS-F40293	2F028700-8717-47EE-B60E-F0D73A04C1B2	TCGA-E9-A2JS-R55892	4030FD77-DBC6-4EA9-8695-C17F48881165								Lumpectomy				NO	31	15			713	677	0			524	133	105		Zoladex			0C66CAB2-DFF7-4F09-86F0-9E1CB97CC2FD		Scheduled Follow-up Submission
TCGA-D8-A13Z-01A					51	Right Lower Outer Quadrant	Regional site	Axillary lymph node dissection alone		85.85.0	Nationwide Children's Hospital	TCGA-D8-A13Z-D65314	D08EFDD4-5EBB-4816-910D-C6EAC35DE992	TCGA-D8-A13Z-F20731	444554B2-937F-4327-A7CC-E6A2B5BDC2B7	TCGA-D8-A13Z-R20733	022E96E7-CD23-4434-A287-97397DC0002B		Negative					Negative	Modified Radical Mastectomy					31	14			157	52	0				210	184		tamoxifen			CFCEFAFC-B354-4710-B452-ABE1D235E406		Scheduled Follow-up Submission
TCGA-A7-A26I-01A					65	Left	Primary Tumor Field	Axillary lymph node dissection alone		142.78.0	Nationwide Children's Hospital	TCGA-A7-A26I-D31070	8D9064E7-67A8-4172-A033-3A6E46CA915D	TCGA-A7-A26I-F39791	66A09C74-D0D8-438E-8C18-EC119CB56D3A	TCGA-A7-A26I-R30889	72D346BE-A998-4B4F-919F-D0ACF1E8D7F2	Negative	Negative				Other	Negative	Lumpectomy	Re-Excision of Superior Margin		1	NO	31	1			164	60	0				258	213	NO	Cytoxan			0D6E2A74-BE71-40C2-8D9A-0B243709583D	2.0	Scheduled Follow-up Submission
TCGA-A7-A26I-01B					65	Left	Primary Tumor Field	Axillary lymph node dissection alone		142.78.0	Nationwide Children's Hospital	TCGA-A7-A26I-D31070	8D9064E7-67A8-4172-A033-3A6E46CA915D	TCGA-A7-A26I-F39791	66A09C74-D0D8-438E-8C18-EC119CB56D3A	TCGA-A7-A26I-R30889	72D346BE-A998-4B4F-919F-D0ACF1E8D7F2	Negative	Negative				Other	Negative	Lumpectomy	Re-Excision of Superior Margin		1	NO	31	1			164	60	0				258	213	NO	Cytoxan			0D6E2A74-BE71-40C2-8D9A-0B243709583D	2.0	Scheduled Follow-up Submission
TCGA-AC-A8OR-01A					75	Left		Sentinel node biopsy alone		379.34.0	Nationwide Children's Hospital								Positive					Positive	Simple Mastectomy				YES	31	26					0									90-99%	0DE71183-E87C-4E22-9478-285DCCCD3CCE
TCGA-EW-A1PH-01A					52	Right Upper Outer Quadrant	Primary Tumor Field	Sentinel lymph node biopsy plus axillary dissection		124.80.0	Nationwide Children's Hospital	TCGA-EW-A1PH-D29113	CE3771B3-13A0-460B-B9C7-C17BAA64C06A	TCGA-EW-A1PH-F41145	1D45F7E0-49FF-4FE9-AB11-639270B50BAF	TCGA-EW-A1PH-R32259	B13D295F-A310-4C1A-9812-BFC67F771E56		Negative	3 Point Scale		3 Point Scale		Negative	Lumpectomy			1	YES	31	12			271	215	0				322	276	NO	Taxol		<10%	6B098134-6146-4CC2-A8D6-457E14EB2C92		Scheduled Follow-up Submission
TCGA-D8-A1JC-01A					59	Left Upper Outer Quadrant	Primary Tumor Field	Axillary lymph node dissection alone		109.88.0	Nationwide Children's Hospital	TCGA-D8-A1JC-D65319	FECB156F-3FF8-4A4B-B968-896FD0893868	TCGA-D8-A1JC-F20847	6E9DB5EF-A97B-4101-B6FB-344C19F675D5	TCGA-D8-A1JC-R20849	A9A5EA39-2CEF-4A69-A4C6-E072C872237D		Positive					Positive	Modified Radical Mastectomy				NO	31	19			87	24	0				147	122		cyclophosphamide			39F202C6-87E3-475A-B697-0608C5A3E55E		Scheduled Follow-up Submission
TCGA-A7-A0DC-01A					63	Right	Primary Tumor Field	Sentinel lymph node biopsy plus axillary dissection		47.97.0	Nationwide Children's Hospital	TCGA-A7-A0DC-D34625	0E08C9C8-C699-416C-AE02-F59B9358B98C	TCGA-A7-A0DC-F40607	7D70ECB9-709E-4531-B63D-60B752AA7D2A	TCGA-A7-A0DC-R3194	9939e1ca-953b-4e0a-a861-225fee9920c8								Simple Mastectomy			1	YES	31	25				510	0				351	309		Tamoxifen			5A0D0673-1A8C-4CB1-86DE-0DADDB2F6698
TCGA-A7-A0DC-01B					63	Right	Primary Tumor Field	Sentinel lymph node biopsy plus axillary dissection		47.97.0	Nationwide Children's Hospital	TCGA-A7-A0DC-D34625	0E08C9C8-C699-416C-AE02-F59B9358B98C	TCGA-A7-A0DC-F40607	7D70ECB9-709E-4531-B63D-60B752AA7D2A	TCGA-A7-A0DC-R3194	9939e1ca-953b-4e0a-a861-225fee9920c8								Simple Mastectomy			1	YES	31	25				510	0				351	309		Tamoxifen			5A0D0673-1A8C-4CB1-86DE-0DADDB2F6698
TCGA-A7-A0DC-11A					63	Right	Primary Tumor Field	Sentinel lymph node biopsy plus axillary dissection		47.97.0	Nationwide Children's Hospital	TCGA-A7-A0DC-D34625	0E08C9C8-C699-416C-AE02-F59B9358B98C	TCGA-A7-A0DC-F40607	7D70ECB9-709E-4531-B63D-60B752AA7D2A	TCGA-A7-A0DC-R3194	9939e1ca-953b-4e0a-a861-225fee9920c8								Simple Mastectomy			1	YES	31	25				510	0				351	309		Tamoxifen			5A0D0673-1A8C-4CB1-86DE-0DADDB2F6698
TCGA-AO-A03L-01A					34	Right	Regional site	Sentinel lymph node biopsy plus axillary dissection		61.88.0	Nationwide Children's Hospital	TCGA-AO-A03L-D5926	1def3807-a1e2-4d1c-a417-9b8d8302d065	TCGA-AO-A03L-F19390	CC654247-3426-49B3-B47E-C503B40F898C	TCGA-AO-A03L-R5859	5fb3a572-ca52-4caf-8a15-9bf2aa8e7bba								Modified Radical Mastectomy			1	NO	31	12			2057	363	0				208	167		Lupron			450E65DC-55BE-4E70-8418-2D1CF1D0D807		Scheduled Follow-up Submission
TCGA-D8-A1J8-01A					77	Right Upper Outer Quadrant		Axillary lymph node dissection alone		109.88.0	Nationwide Children's Hospital	TCGA-D8-A1J8-D14041	3DDE2EBA-A85F-48E1-AAC2-D34371DCC95D	TCGA-D8-A1J8-F14040	EE01E96E-58A8-4B56-AE04-E66483766188				Positive					Positive	Modified Radical Mastectomy					31	18				32	0							nolvadex		70-79%	4A7FB727-A517-41AB-8ED5-6EC87D94FE69		Scheduled Follow-up Submission
TCGA-A8-A08C-01A					65	Left Upper Inner Quadrant	Primary Tumor Field			47.97.0	Nationwide Children's Hospital	TCGA-A8-A08C-D37818	12320A9F-0C0D-402C-92BD-95A4C989BA15	TCGA-A8-A08C-F40842	EE8A8BCF-C75E-4E24-9DA3-1CD8DFA9B713	TCGA-A8-A08C-R38170	0D8A37D3-AE94-4C70-8872-27E4BDAFA181		Positive					Positive	Other		n/a			31	2				243	0				243	182		Tamoxifen			F545A7C1-E7B3-442E-AFA2-E4A05BE61822
TCGA-EW-A1IZ-01A					53	Left Lower Outer Quadrant	Local Recurrence	Axillary lymph node dissection alone		109.88.0	Nationwide Children's Hospital	TCGA-EW-A1IZ-D29260	F8E114ED-A2E9-45CF-8C5D-262BC6C1502D	TCGA-EW-A1IZ-F21543	78FCD753-17E1-4043-8A55-B3DB082E3A80	TCGA-EW-A1IZ-R21549	FA7E93F3-A23C-4264-83BF-68B207E736B2		Positive	3 Point Scale	3+	3 Point Scale		Positive	Modified Radical Mastectomy			1	NO	31	6			176	70	0				261	197	NO	Adriamycin		90-99%	58313ACB-83E0-4097-83C2-C19283DA9191		Scheduled Follow-up Submission
TCGA-BH-A0E7-01A	NO	NO	NO	NO	79	Left	Primary Tumor Field	Axillary lymph node dissection alone		56.90.0	Nationwide Children's Hospital	TCGA-BH-A0E7-D4653	7F0147D6-EB47-47CD-A3B8-E8B645FAB517	TCGA-BH-A0E7-F4656	C4793CFE-2B14-4704-BEC5-5E9961E516CD	TCGA-BH-A0E7-R4655	8916C7B7-CD5F-4704-A422-9233DB47C9AA								Other			1	NO	31	16				26	0				124	74		ARIMIDEX			8B35D11C-B64B-443A-8DE1-54E2C816D422
TCGA-BH-A18G-01A					81	Right	Primary Tumor Field	Sentinel lymph node biopsy plus axillary dissection		93.85.0	Nationwide Children's Hospital			TCGA-BH-A18G-F64216	112BA8BF-77D2-4E83-AAFE-9FABF7EC76CA	TCGA-BH-A18G-R64217	911630F0-5BE2-4E57-8DB4-987BF400F086		Negative					Negative	Other					31	27					0				149	103					0A77D8F4-CB2F-4A0D-886C-354A4E7FF9A5
TCGA-AR-A1AN-01A					46	Right Upper Outer Quadrant	Primary Tumor Field	Sentinel lymph node biopsy plus axillary dissection		96.78.0	Nationwide Children's Hospital	TCGA-AR-A1AN-D21991	0B897029-9392-428C-B8B8-6DA05D449134	TCGA-AR-A1AN-F69273	D4512F43-4A80-4EAD-93CF-973446AA72BA	TCGA-AR-A1AN-R21989	467D9E15-348F-40CC-9E9C-FE3500CBD635		Positive					Positive	Other			1	YES	31	31			91	47	0				211	169		Doxorubicin		70-79%	068AC985-6275-4281-B79F-A81F22AD1F6E		Scheduled Follow-up Submission
TCGA-OL-A5RZ-01A					57	Left Upper Outer Quadrant		Sentinel lymph node biopsy plus axillary dissection		296.54.0	Nationwide Children's Hospital	TCGA-OL-A5RZ-D65263	70A2566A-B315-479A-82BF-250CBCAF6F3B	TCGA-OL-A5RZ-F56571	1921F25F-EC28-4E7A-A12E-A445D1DDBE0D				Positive					Negative	Simple Mastectomy					31	14			331	239	0							Cytoxan		30-39%	06486DD4-0D90-44CD-9975-AB75A7512AEB	2.0
TCGA-AR-A2LJ-01A					40	Left	Primary Tumor Field	Sentinel lymph node biopsy plus axillary dissection		185.69.0	Nationwide Children's Hospital	TCGA-AR-A2LJ-D37697	5C63D548-84D8-4253-AC3F-91CB50B0178B	TCGA-AR-A2LJ-F35167	B4BFC81E-8655-457D-93D0-43609FAF7A31	TCGA-AR-A2LJ-R37266	97483A09-7652-4CE8-940E-A82D5C9F5E30		Positive					Positive	Other				YES	31	7				190	0				231	196	NO	Tamoxifen		70-79%	3DAB69DD-4905-481E-8E22-338933369AE5
TCGA-BH-A42U-01A					80	Right				255.56.0	Nationwide Children's Hospital			TCGA-BH-A42U-F61923	19515634-4B7A-46FC-8FFD-C9C2EB15C93A				Negative					Negative	Simple Mastectomy					31	10					0										1A3ECA50-BDC3-42D0-88F6-BCCDBF451880
TCGA-AR-A2LH-01A					55	Right Upper Outer Quadrant	Primary Tumor Field	Sentinel lymph node biopsy plus axillary dissection		177.73.0	Nationwide Children's Hospital	TCGA-AR-A2LH-D37261	40102DFF-32EF-4C9C-B97B-78B3CC02F990	TCGA-AR-A2LH-F35165	0F86B9CC-D89A-47B8-A9D1-60EA8626DB04	TCGA-AR-A2LH-R37176	C1A492A6-382A-4863-9A54-E60996E31148		Negative					Negative	Modified Radical Mastectomy					31	6			140	98	0			434	214		YES	Paclitaxel			CE28AC1D-24BA-4F15-9635-85362619310E
TCGA-LL-A5YM-01A	YES	YES			88	Left Upper Inner Quadrant	Local Recurrence	No axillary staging		296.54.0	Nationwide Children's Hospital	TCGA-LL-A5YM-D57542	EBAB50E8-81A5-49D8-92FB-7A44273418AB	TCGA-LL-A5YM-F57541	D396D059-CF4A-4F46-86D7-079FA3777796	TCGA-LL-A5YM-R57543	90327544-390D-4E11-88EB-FCDB0ABD67FA	Negative	Positive	3 Point Scale	3+	3 Point Scale	Mastectomy NOS	Positive	Other					31	14					0		258	258	339	307		letrozole		90-99%	8DFA266C-1EE4-45E7-B1F5-9DA6A7719DED	54
TCGA-LL-A442-01A					56	Left Lower Outer Quadrant		Sentinel node biopsy alone		255.56.0	Nationwide Children's Hospital	TCGA-LL-A442-D36069	E1D4E54E-9B75-48FF-AF1C-506222B5E941	TCGA-LL-A442-F46384	AB2B5DCA-684E-49C8-8594-0A66AD27B2F5				Positive	3 Point Scale	3+	3 Point Scale		Positive	Simple Mastectomy				YES	31	7				111	0							Arimidex		90-99%	A5818A1A-D85B-43FC-A1E7-547FF4AA176E	35
TCGA-E2-A1LH-01A					59	Right	Regional site	Sentinel node biopsy alone		120.76.0	Nationwide Children's Hospital	TCGA-E2-A1LH-D20652	908E780C-09EB-4CBC-AD5A-75B352A71460	TCGA-E2-A1LH-F20649	29497476-76A6-4D7C-9478-FBA0801FDFDF	TCGA-E2-A1LH-R20662	08EE86D2-364F-4AA5-9959-6D8413398AD2		Negative	3 Point Scale		3 Point Scale		Negative	Lumpectomy			1	NO	31	12			104	41	0				189	147	NO	Adriamycin			9F9D7015-A628-4C43-8BAB-01355CF3E22F		Scheduled Follow-up Submission
TCGA-E2-A1LH-11A					59	Right	Regional site	Sentinel node biopsy alone		120.76.0	Nationwide Children's Hospital	TCGA-E2-A1LH-D20652	908E780C-09EB-4CBC-AD5A-75B352A71460	TCGA-E2-A1LH-F20649	29497476-76A6-4D7C-9478-FBA0801FDFDF	TCGA-E2-A1LH-R20662	08EE86D2-364F-4AA5-9959-6D8413398AD2		Negative	3 Point Scale		3 Point Scale		Negative	Lumpectomy			1	NO	31	12			104	41	0				189	147	NO	Adriamycin			9F9D7015-A628-4C43-8BAB-01355CF3E22F		Scheduled Follow-up Submission
TCGA-AQ-A54O-01A					51	Right Upper Outer Quadrant		Sentinel lymph node biopsy plus axillary dissection		271.56.0	Nationwide Children's Hospital	TCGA-AQ-A54O-D40688	02A79C21-928D-4FE9-BD1D-934CD3ABE809	TCGA-AQ-A54O-F55731	8B3E15A7-7C5B-4B61-869F-74A0E7751612				Positive					Positive	Simple Mastectomy				YES	31	14				199	0							Tamoxifen		90-99%	C309C4BB-E17D-4157-A611-8214D99FF3B3
TCGA-A8-A08Z-01A					76	Left				47.97.0	Nationwide Children's Hospital								Positive					Positive	Other					31	27					0										A1235155-1BB0-4C7F-B146-465D9047126F
TCGA-AR-A0TX-01A					64	Left Upper Outer Quadrant		Axillary lymph node dissection alone		72.90.0	Nationwide Children's Hospital			TCGA-AR-A0TX-F49468	430C16CF-997B-4D57-9615-B27A264E0BEA	TCGA-AR-A0TX-R19619	BA27F3B1-95DB-46EC-A3DC-2BC907DF01CD		Positive					Positive	Other				NO	31	2					0									<10%	438BCB88-339C-4F5B-B051-5195A04AF834		Scheduled Follow-up Submission
TCGA-BH-AB28-01A					53	Left				379.34.0	Nationwide Children's Hospital	TCGA-BH-AB28-D61474	5A9C6B1E-27C2-496C-8266-4D565A27C07F	TCGA-BH-AB28-F64209	6CB9D593-9190-4C31-968A-C9D75BC2480D				Positive					Positive	Modified Radical Mastectomy					31	25				122	0							Cytoxan			7FC3A00F-A041-492D-A056-F79ED1759024
TCGA-BH-AB28-11A					53	Left				379.34.0	Nationwide Children's Hospital	TCGA-BH-AB28-D61474	5A9C6B1E-27C2-496C-8266-4D565A27C07F	TCGA-BH-AB28-F64209	6CB9D593-9190-4C31-968A-C9D75BC2480D				Positive					Positive	Modified Radical Mastectomy					31	25				122	0							Cytoxan			7FC3A00F-A041-492D-A056-F79ED1759024
TCGA-A8-A07S-01A					73	Left Upper Outer Quadrant	Primary Tumor Field			56.90.0	Nationwide Children's Hospital	TCGA-A8-A07S-D37858	D07D6350-F930-4F58-9B82-9257EC76316B	TCGA-A8-A07S-F40833	78B6AD18-7DC4-47A4-908E-5490DAE3A3B9	TCGA-A8-A07S-R38181	DA0CEEAB-4453-45D1-810B-36039944F72C		Positive					Negative	Other		n/a			31	2				151	0				151	121		Tamoxifen			E74C2E69-55FA-45DC-8DBB-BB0038F4C2F5
TCGA-AO-A0J2-01A					41	Left		Sentinel node biopsy alone		56.90.0	Nationwide Children's Hospital	TCGA-AO-A0J2-D3125	56624a3a-1602-438a-b089-4782c8fcbed6	TCGA-AO-A0J2-F15481	04B90C44-B6F4-4F85-A233-052B0C12C62B										Simple Mastectomy				YES	31	22			162	120	0							PACLITAXEL			7447CBD4-A839-4B8B-8C6F-E5DC60BD20DF		Scheduled Follow-up Submission
TCGA-AN-A0AM-01A					56	Left Upper Outer Quadrant		No axillary staging		56.90.0	Nationwide Children's Hospital			TCGA-AN-A0AM-F68945	CCD98B71-7FC0-4FB5-9595-B9E2959A20F0				Positive					Negative	Modified Radical Mastectomy				NO	31	23					0										08009684-4294-44C4-A7EB-2CDC75EA314E
TCGA-AN-A0FD-01A					71	Left Upper Outer Quadrant		Axillary lymph node dissection alone		56.90.0	Nationwide Children's Hospital			TCGA-AN-A0FD-F68949	9FB2953C-EB8B-42E6-AF03-F9EF349ADA40				Positive		1+			Positive	Modified Radical Mastectomy				NO	31	23					0								dextran coated charcoal	80-89%	1F34A37A-00E4-4B60-9123-E17C647F77A5
TCGA-A2-A3XV-01A					46	Right	Primary Tumor Field	Sentinel node biopsy alone		239.55.0	Nationwide Children's Hospital	TCGA-A2-A3XV-D34633	660D3D61-D8EE-44B2-8CE3-F93CB2202075	TCGA-A2-A3XV-F43306	F58B3842-7B71-4CD6-B9D5-605951079187	TCGA-A2-A3XV-R34635	EFC36FA5-0568-4B56-8EFF-E56B96239F74		Positive	3 Point Scale				Negative	Lumpectomy				YES	31	16				429	0				258	247		Tamoxifen		<10%	336231A6-B8B8-498C-AC80-2A0978B1EC5D	1.7
TCGA-E2-A159-01A					50	Left Lower Outer Quadrant	Primary Tumor Field	Sentinel node biopsy alone		85.85.0	Nationwide Children's Hospital	TCGA-E2-A159-D19116	57830A90-A8C2-4396-977D-CC41223CD5E3	TCGA-E2-A159-F19115	0C4FDB82-9EF8-4D7E-9A24-4B151317F7F1	TCGA-E2-A159-R19120	ABEB4CB1-0F56-4D55-8796-EF6EF74DD791		Negative					Negative	Lumpectomy			1	NO	31	8			91	50	0				215	165	NO	Cyclophosphamide	Allred score 0+0 = 0		9B1EA889-4F9D-4B47-8D81-8A96251C7AA5		Scheduled Follow-up Submission
TCGA-A8-A09I-01A					84	Right Lower Outer Quadrant				56.90.0	Nationwide Children's Hospital	TCGA-A8-A09I-D37746	331D363E-6139-4987-8F35-4A2453871C03	TCGA-A8-A09I-F40333	75A6C6B1-5909-4715-B91F-CAAA3CBE8AD0				Positive					Positive	Other		n/a			31	17				31	0							Anastrozole			D94192B4-FB25-466A-B737-6104814AB207
TCGA-BH-A0H5-01A					45	Right Upper Outer Quadrant				85.85.0	Nationwide Children's Hospital	TCGA-BH-A0H5-D58732	C099D047-9A31-4CB6-8F0B-FEAF89B6F351	TCGA-BH-A0H5-F58727	6C579D1F-0A86-4BC6-9C10-E56A23CDE9FB				Positive					Positive	Other					31	22				174	0						NO	Taxotere			21553DB2-08F3-47E7-95FA-0335C274F1C3
TCGA-BH-A0H5-11A					45	Right Upper Outer Quadrant				85.85.0	Nationwide Children's Hospital	TCGA-BH-A0H5-D58732	C099D047-9A31-4CB6-8F0B-FEAF89B6F351	TCGA-BH-A0H5-F58727	6C579D1F-0A86-4BC6-9C10-E56A23CDE9FB				Positive					Positive	Other					31	22				174	0						NO	Taxotere			21553DB2-08F3-47E7-95FA-0335C274F1C3
TCGA-A2-A0T6-01A					50	Left	Primary Tumor Field	Sentinel node biopsy alone		72.90.0	Nationwide Children's Hospital	TCGA-A2-A0T6-D3995	23fa8497-3a06-42ab-900c-69deab1936ed	TCGA-A2-A0T6-F13950	2B2337EC-2A4F-453E-8EE6-AA03BC570460	TCGA-A2-A0T6-R3993	d4bf30e0-a82d-445a-b39e-effcb98e7e05		Positive		3+			Positive	Simple Mastectomy			1	YES	31	12			204	95	0				279	231		Adriamycin		90-99%	1059862B-D875-4363-87C0-1FF0F8C33C8F		Scheduled Follow-up Submission
TCGA-A8-A09Q-01A					83	Left Lower Inner Quadrant				47.97.0	Nationwide Children's Hospital	TCGA-A8-A09Q-D37769	F3220351-3FF6-4231-8B5E-3A27001C00EB	TCGA-A8-A09Q-F41022	4B42D5B1-911A-4C69-9E7E-C9578A82AB6B				Positive					Positive	Other		n/a			31	10				31	0							Anastrozole			45ABA8D1-89E1-4FBD-9FCA-60E5ED80C68C
TCGA-E9-A22H-01A					42	Left Upper Outer Quadrant	Regional site	Axillary lymph node dissection alone		136.76.0	Nationwide Children's Hospital	TCGA-E9-A22H-D29946	499F5082-99DF-470D-84D6-9FBBFC024994	TCGA-E9-A22H-F40642	96EF7CF3-8F22-4C87-873C-B9949AF32410	TCGA-E9-A22H-R29948	F3897CAB-461B-410A-97F0-4EF8AEBC50BF		Positive					Positive	Modified Radical Mastectomy				YES	31	26			226	15	0				78	78	NO	5-Fluorouracil		<10%	3E818482-CCF2-46DA-A0F0-C90B664A641A		Scheduled Follow-up Submission
TCGA-B6-A0IC-01A					90	Right		No axillary staging		56.90.0	Nationwide Children's Hospital			TCGA-B6-A0IC-F12613	CF95FD2E-C76A-41EB-9F33-EBE7067B8203				Positive					Positive	Other				NO	31	1					0								IHC		DAD0089F-4CCA-46A7-8415-50B3DD3239AC		Scheduled Follow-up Submission
TCGA-C8-A137-01A	NO	YES			34	Left	Local Recurrence	Axillary lymph node dissection alone		85.85.0	Nationwide Children's Hospital			TCGA-C8-A137-F70815	3319B260-E0F5-4ABA-9676-DA21E0BDF2CB	TCGA-C8-A137-R70816	6A57E479-51F6-4266-BF13-7BF4F13D224C		Negative					Negative	Modified Radical Mastectomy					31	9					0			136		137	NO				73113A67-157A-4FC6-8BF4-9EA1AE7E3A58		Scheduled Follow-up Submission
TCGA-A8-A07B-01A					69	Left Lower Outer Quadrant				47.97.0	Nationwide Children's Hospital			TCGA-A8-A07B-F40823	4265C9DA-22B4-4682-A01B-71D9E453CB98				Positive					Positive	Other					31	2					0										94715DC9-0E59-415E-AB0D-617EFA2ADF98
TCGA-AR-A1AX-01A					64	Left Upper Outer Quadrant	Primary Tumor Field	Sentinel lymph node biopsy plus axillary dissection		96.78.0	Nationwide Children's Hospital	TCGA-AR-A1AX-D22143	9E6B462C-33CD-4914-B565-BF5F728AA385	TCGA-AR-A1AX-F49480	3C2C45B7-1BAB-4945-8691-5213ECC2496A	TCGA-AR-A1AX-R22141	FD178C27-E6A3-460C-95B5-BB1D1CC94E82		Positive					Positive	Other			1	YES	31	2				54	0				242	194		Cytoxan			D1F28D75-A9D5-4D61-96DF-AB9811E70BB8		Scheduled Follow-up Submission
TCGA-E9-A1NI-01A					51	Left Upper Outer Quadrant		Axillary lymph node dissection alone		120.76.0	Nationwide Children's Hospital	TCGA-E9-A1NI-D35028	D4990B88-4B53-4E5A-A245-788D6F0CB831	TCGA-E9-A1NI-F52056	4876BC0D-F943-41B2-8EE0-FAF3D05A3FCE				Positive					Positive					YES	31	27				86	0						NO	Tamoxifen			EBFD7C7B-58A9-40A4-AADC-36360A4AFA8A		Scheduled Follow-up Submission
TCGA-AR-A0TV-01A					66	Left Upper Outer Quadrant		Sentinel lymph node biopsy plus axillary dissection		72.90.0	Nationwide Children's Hospital			TCGA-AR-A0TV-F71734	7EDE43D9-4F69-47CC-86A2-583C68ECC646				Positive					Positive	Simple Mastectomy				YES	31	30					0									90-99%	64531600-5172-4621-9C49-D90C62B0BE3E		Scheduled Follow-up Submission
TCGA-B6-A409-01A	YES	YES			44	Right Upper Outer Quadrant		Sentinel lymph node biopsy plus axillary dissection		255.56.0	Nationwide Children's Hospital	TCGA-B6-A409-D41062	2FE8275D-A6CE-4337-A4BE-E37271CD0124						Negative	4 Point Scale	1+	4 Point Scale		Negative	Simple Mastectomy				NO	31	11			149	107	0			456				Paclitaxel		<10%	D5D4ED0E-B435-4CC5-815F-91EFBB9B0AC2	1.8
TCGA-E9-A226-01A					45	Left Lower Inner Quadrant	Regional site	Axillary lymph node dissection alone		136.76.0	Nationwide Children's Hospital	TCGA-E9-A226-D55887	2C88B47F-36AA-43AF-95BB-33939622235F	TCGA-E9-A226-F39536	2E5DFE54-8DD8-45DF-AAE0-4C72C600C8A0	TCGA-E9-A226-R29958	0516AC70-E0BC-4A79-B7E7-95CC9ED41DE0								Modified Radical Mastectomy				NO	31	24			937	790	0				117	94	NO	Pamidronate			1F8394FA-E90B-4731-BF06-087F9C4A3252		Scheduled Follow-up Submission
TCGA-E2-A1IJ-01A					57	Right Upper Outer Quadrant	Primary Tumor Field	Sentinel node biopsy alone		117.78.0	Nationwide Children's Hospital	TCGA-E2-A1IJ-D19952	F81CA42B-439C-4C65-B16B-D4461F89A002	TCGA-E2-A1IJ-F19950	410FB9DE-FA2F-41B4-9C9A-584E963EA019	TCGA-E2-A1IJ-R19953	2BFADC86-259E-4148-BD17-F7BB8E92FE88		Positive	3 Point Scale		3 Point Scale		Positive	Lumpectomy			1	NO	31	21				48	0				102	53	NO	Arimidex		90-99%	B854966D-676C-4EE6-BA3C-5F20DE364520		Scheduled Follow-up Submission
TCGA-A2-A4RY-01A					46	Right	Primary Tumor Field	Axillary lymph node dissection alone		271.56.0	Nationwide Children's Hospital	TCGA-A2-A4RY-D40662	E5560868-E57D-4A2B-83C8-C2B50D5B8224	TCGA-A2-A4RY-F59208	D3984B99-34DF-4EBE-B92B-EADBB216CA0B	TCGA-A2-A4RY-R40667	A727732D-1D49-47FA-A481-F1DF8B6221E4		Positive	3 Point Scale	3+	3 Point Scale		Positive	Modified Radical Mastectomy				NO	31	5				203	0				238	193		Tamoxifen		90-99%	4E8107E0-9F0E-45CD-87BE-3629DF6BCC12
TCGA-E2-A15J-01A					51	Left Upper Outer Quadrant		Sentinel node biopsy alone		96.78.0	Nationwide Children's Hospital	TCGA-E2-A15J-D18893	A6C43C80-32E8-4A0D-A6C0-6332C91C8B32	TCGA-E2-A15J-F70020	EA54E7E2-D8FF-48C4-8B88-F15C664136DF				Positive					Positive	Simple Mastectomy				NO	31	9			128	65	0						NO	Docetaxel			17C0F711-0276-42EA-B092-D3DE58A1927C		Scheduled Follow-up Submission
TCGA-EW-A1IY-01A					38	Right Upper Inner Quadrant		Other (specify)	sentinel LN and one non sentinel LN	109.88.0	Nationwide Children's Hospital	TCGA-EW-A1IY-D29086	B9D6330E-568E-4DCD-8ED3-7D3138997A66	TCGA-EW-A1IY-F29084	147F2CD8-48E7-43BC-901D-A96966A4ABC2				Positive	3 Point Scale	3+	3 Point Scale		Positive	Lumpectomy				YES	31	5			119	57	0						NO	Taxotere/Cytoxan		90-99%	C49C6C28-A23C-4191-A12A-57B586746B9A		Scheduled Follow-up Submission
TCGA-AO-A0JF-01A					68	Left	Primary Tumor Field	Sentinel lymph node biopsy plus axillary dissection		61.88.0	Nationwide Children's Hospital	TCGA-AO-A0JF-D3206	69646598-6e7b-4f0c-a0e9-601b648159df	TCGA-AO-A0JF-F72115	704FB623-3791-4E9D-8194-3C9B34439C3B	TCGA-AO-A0JF-R3205	605f8f77-3566-431e-93ae-33ec0b26904a								Lumpectomy			1	NO	31	15			155	105	0				328	299		CYCLOPHOSPHAMIDE			6DE77542-CDF5-4E12-8FE2-AB9D0ADD0A3F		Scheduled Follow-up Submission
TCGA-E2-A1IU-01A					60	Right Upper Outer Quadrant		Sentinel node biopsy alone		120.76.0	Nationwide Children's Hospital	TCGA-E2-A1IU-D19975	6BB85C8B-BED1-4F0D-B330-2307404DA314	TCGA-E2-A1IU-F19974	24CBF8D6-4B40-4569-A40F-F3C906BEEA9D				Positive					Positive	Simple Mastectomy				NO	31	4				36	0						NO	Arimidex			8133821C-515E-4D7F-B313-EB76AE4C7A64		Scheduled Follow-up Submission
TCGA-E2-A1IU-11A					60	Right Upper Outer Quadrant		Sentinel node biopsy alone		120.76.0	Nationwide Children's Hospital	TCGA-E2-A1IU-D19975	6BB85C8B-BED1-4F0D-B330-2307404DA314	TCGA-E2-A1IU-F19974	24CBF8D6-4B40-4569-A40F-F3C906BEEA9D				Positive					Positive	Simple Mastectomy				NO	31	4				36	0						NO	Arimidex			8133821C-515E-4D7F-B313-EB76AE4C7A64		Scheduled Follow-up Submission
TCGA-WT-AB44-01A					77	Left	Primary Tumor Field	No axillary staging		379.34.0	Nationwide Children's Hospital	TCGA-WT-AB44-D62427	670B2675-CB98-412D-B3C0-FE647880FDCA	TCGA-WT-AB44-F66640	0A7190BA-575B-41F4-8F55-012383288578	TCGA-WT-AB44-R62428	491AD153-4239-4288-A7BE-B32A0155FEB4		Positive	3 Point Scale	3+	3 Point Scale		Positive	Lumpectomy					31	21				31	0				153	92		Arimidex		90-99%	45D86EDC-5603-4A15-98F1-54B64AF7900E
TCGA-A7-A26E-01A					71	Left	Primary Tumor Field	Sentinel lymph node biopsy plus axillary dissection		142.78.0	Nationwide Children's Hospital	TCGA-A7-A26E-D14322	C7645868-53FA-4051-9EEE-5F7F6FD7DEB5	TCGA-A7-A26E-F39792	3EB59670-FB49-4558-A017-3800A97063FB	TCGA-A7-A26E-R14325	1308CF80-262B-4503-AA14-B83907126CA2		Positive	3 Point Scale		3 Point Scale		Positive	Simple Mastectomy			1	NO	31	1			164	101	0				246	205	NO	Cytoxan		90-99%	DB5CAE9A-B6AF-4DBF-B283-3D4B6BF5929A		Scheduled Follow-up Submission
TCGA-A7-A26E-01B					71	Left	Primary Tumor Field	Sentinel lymph node biopsy plus axillary dissection		142.78.0	Nationwide Children's Hospital	TCGA-A7-A26E-D14322	C7645868-53FA-4051-9EEE-5F7F6FD7DEB5	TCGA-A7-A26E-F39792	3EB59670-FB49-4558-A017-3800A97063FB	TCGA-A7-A26E-R14325	1308CF80-262B-4503-AA14-B83907126CA2		Positive	3 Point Scale		3 Point Scale		Positive	Simple Mastectomy			1	NO	31	1			164	101	0				246	205	NO	Cytoxan		90-99%	DB5CAE9A-B6AF-4DBF-B283-3D4B6BF5929A		Scheduled Follow-up Submission
TCGA-AO-A1KO-01A					46	Left		Sentinel lymph node biopsy plus axillary dissection		109.88.0	Nationwide Children's Hospital	TCGA-AO-A1KO-D9901	fdaf8481-4ae7-4917-a33f-7f4624338ea8	TCGA-AO-A1KO-F20630	345F758B-4506-48DC-87A7-25B67862B7DC					4 Point Scale		4 Point Scale			Simple Mastectomy				YES	31	20			160	70	0						NO	Doxorubicin			873CAD3E-709A-4F3C-9D3F-B335CEB4A862		Scheduled Follow-up Submission
TCGA-A2-A0CM-01A	YES	NO	NO		40	Left		Sentinel node biopsy alone		56.90.0	Nationwide Children's Hospital	TCGA-A2-A0CM-D2024	2a0f9e7d-47a8-4977-9845-f9255d292e92	TCGA-A2-A0CM-F2013	5609C4A1-D006-4EAF-B197-174CAF31D43E										Simple Mastectomy				YES	31	6			601	391	0			382				Docetaxel			2DA4EE41-EBE6-4FB4-B1DF-0654AA8412BA
TCGA-AR-A24H-01A					65	Right Lower Outer Quadrant	Primary Tumor Field	Sentinel lymph node biopsy plus axillary dissection		142.78.0	Nationwide Children's Hospital	TCGA-AR-A24H-D31252	D5707F24-629C-4F1F-9D73-89CD2F7CA8A3	TCGA-AR-A24H-F49484	BDA1D14F-8B56-49F4-B1DE-D36E3C2E506B	TCGA-AR-A24H-R31217	7926DA2C-4D80-45A5-8E14-24F769E48DF1		Positive					Positive	Other			1		31	2			1042	23	0				111	37		Tamoxifen			CA9CB9D7-F05B-4BC3-BDA4-48AD0E64897B		Scheduled Follow-up Submission
TCGA-B6-A0I8-01A	YES	YES	YES		46	Right		No axillary staging		56.90.0	Nationwide Children's Hospital			TCGA-B6-A0I8-F12607	939A3148-247E-4863-9E71-A8EB0B343009														NO	31	1		746			0			746							FE260B10-FEF4-4D59-8938-9E201E846644		Scheduled Follow-up Submission
TCGA-GM-A3XN-01A					44	Left Upper Outer Quadrant	Primary Tumor Field	Sentinel lymph node biopsy plus axillary dissection		234.53.0	Nationwide Children's Hospital	TCGA-GM-A3XN-D41969	F9D001E6-39C1-43A9-B5B7-5A833D67EBE7	TCGA-GM-A3XN-F46967	D2D39B9A-798A-44E3-8BDB-5D3DA01F9BDD	TCGA-GM-A3XN-R35530	BEB66920-DAD1-453E-A0F4-9C99FAAFDF03		Positive					Positive	Lumpectomy				NO	31	20				1592	0				394	359		Arimidex		80-89%	A012414C-4C48-44BB-B5AC-6887CB6AB3C0	1.73
TCGA-A1-A0SN-01A					50	Left		Sentinel lymph node biopsy plus axillary dissection		117.78.0	Nationwide Children's Hospital	TCGA-A1-A0SN-D12157	4E133864-9EDE-40C9-91C3-E5E05D9D8545			TCGA-A1-A0SN-R12068	C407753A-0959-403F-A289-925E56F5B012		Positive					Positive	Lumpectomy					31	23			879	179	0				361	331		herceptin		90-99%	615C52D8-624C-436F-8490-4FA5BF3114F8
TCGA-E2-A14W-01A					78	Left Upper Outer Quadrant		Sentinel node biopsy alone		93.85.0	Nationwide Children's Hospital	TCGA-E2-A14W-D18808	9A006D8C-5728-4281-81D4-F33365AFA016	TCGA-E2-A14W-F18803	76297030-41ED-487B-B704-02C9E748CCC0				Positive	3 Point Scale		3 Point Scale		Positive	Simple Mastectomy				NO	31	4			106	43	0						NO	Docetaxel			8A9E0F17-4E33-4DE8-9185-EC9D8369329C		Scheduled Follow-up Submission
TCGA-E2-A1IF-01A					74	Left Upper Outer Quadrant		Sentinel node biopsy alone		117.78.0	Nationwide Children's Hospital	TCGA-E2-A1IF-D19963	B72C6A80-3E80-4683-A073-49251E7CF780	TCGA-E2-A1IF-F19962	CE3CD2D3-5B39-4490-BD37-8EA5028464DB				Positive					Positive	Lumpectomy				NO	31	21				41	0						NO	Arimidex	allred score 5+3=8		5D039E90-A413-4965-A16C-9EB43122E397		Scheduled Follow-up Submission
TCGA-E2-A1IF-11A					74	Left Upper Outer Quadrant		Sentinel node biopsy alone		117.78.0	Nationwide Children's Hospital	TCGA-E2-A1IF-D19963	B72C6A80-3E80-4683-A073-49251E7CF780	TCGA-E2-A1IF-F19962	CE3CD2D3-5B39-4490-BD37-8EA5028464DB				Positive					Positive	Lumpectomy				NO	31	21				41	0						NO	Arimidex	allred score 5+3=8		5D039E90-A413-4965-A16C-9EB43122E397		Scheduled Follow-up Submission
TCGA-A2-A3KD-01A					47	Right Upper Outer Quadrant		Sentinel lymph node biopsy plus axillary dissection		202.69.0	Nationwide Children's Hospital	TCGA-A2-A3KD-D30120	AB03C3FC-D1ED-4F17-8BFB-C5123D0EC3B1	TCGA-A2-A3KD-F37343	F2E6F4BD-FA19-43B2-BFCD-124FE5BFF06B	TCGA-A2-A3KD-R30122	C063B997-34B9-44F4-B7CA-6F5540ED5D27	Close	Positive	3 Point Scale		3 Point Scale	Mastectomy NOS	Positive	Lumpectomy			1	YES	31	3			190	127	0				272	222	NO	Taxotere		90-99%	1B54EE65-AB86-463E-A7D8-B66786FE576B
TCGA-A2-A0T5-01A					39	Left		Sentinel node biopsy alone		72.90.0	Nationwide Children's Hospital	TCGA-A2-A0T5-D4005	651802d7-8efb-4de1-acac-0cde103d8b74	TCGA-A2-A0T5-F13949	FF9E318B-6811-4218-A62F-2D57AA48A597				Positive					Positive	Simple Mastectomy				YES	31	12			166		0							Cytoxan		90-99%	761F3732-0E6E-4604-A9EA-CF647A45DE1E		Scheduled Follow-up Submission
TCGA-E9-A5FK-01A					60	Right Upper Outer Quadrant	Regional site	Axillary lymph node dissection alone		288.54.0	Nationwide Children's Hospital	TCGA-E9-A5FK-D56479	255555A4-D618-436B-9BDC-9D9FDC22430D	TCGA-E9-A5FK-F56473	FB6BC71D-5609-451F-A7A5-CF362F0DA12C	TCGA-E9-A5FK-R56480	E57FDF1C-1CD3-4800-9D55-07CDC326E434		Positive	3 Point Scale	3+	3 Point Scale		Positive	Modified Radical Mastectomy				NO	31	10			200	21	0				154	130		5-Fluorouracil		80-89%	B524BAB7-C209-42E1-889B-4A2E323BE3EA
TCGA-AQ-A54N-01A					51	Left Lower Inner Quadrant		Sentinel node biopsy alone		271.56.0	Nationwide Children's Hospital			TCGA-AQ-A54N-F55736	80219E7C-2608-4B42-B6EC-E9DA0D3B6EB5				Negative					Negative	Lumpectomy				YES	31	14					0										3A2F065F-D9DC-48E1-9527-089777F63AB0
TCGA-E9-A1NE-01A					28	Right Lower Outer Quadrant	Regional site	Axillary lymph node dissection alone		124.80.0	Nationwide Children's Hospital	TCGA-E9-A1NE-D32918	ED962811-FC2D-4B99-B1B0-B0B606EC40AC	TCGA-E9-A1NE-F39781	8A04ABC1-6244-42ED-B3A7-4BF655854F46	TCGA-E9-A1NE-R29166	48473E9C-72DD-4F0A-8D3E-85B661B773F4		Positive					Positive					YES	31	1				184	0				171	141	NO	Tamoxifen			2398CA31-3010-4D79-8B24-2F733BC1F07B		Scheduled Follow-up Submission
TCGA-E9-A1NE-11A					28	Right Lower Outer Quadrant	Regional site	Axillary lymph node dissection alone		124.80.0	Nationwide Children's Hospital	TCGA-E9-A1NE-D32918	ED962811-FC2D-4B99-B1B0-B0B606EC40AC	TCGA-E9-A1NE-F39781	8A04ABC1-6244-42ED-B3A7-4BF655854F46	TCGA-E9-A1NE-R29166	48473E9C-72DD-4F0A-8D3E-85B661B773F4		Positive					Positive					YES	31	1				184	0				171	141	NO	Tamoxifen			2398CA31-3010-4D79-8B24-2F733BC1F07B		Scheduled Follow-up Submission
TCGA-C8-A12X-01A					62	Left		Axillary lymph node dissection alone		85.85.0	Nationwide Children's Hospital			TCGA-C8-A12X-F19102	72134208-F31F-470B-845A-66954265B46D				Positive					Positive	Other					31	2					0						NO				3E2AE0E5-F1EA-4EE9-AFCB-C33CCB534DD5		Scheduled Follow-up Submission
TCGA-A8-A0A6-01A					64	Left Upper Outer Quadrant	Primary Tumor Field			61.88.0	Nationwide Children's Hospital	TCGA-A8-A0A6-D37744	81F60DB0-ED0A-47FB-8CCE-8848A03AB8F4	TCGA-A8-A0A6-F40325	63860C23-6640-45E1-B9C8-1E420148833D	TCGA-A8-A0A6-R38120	B5A342AD-F331-44AF-8190-79467FA299ED		Positive					Positive	Other		n/a			31	16				306	0				275	214		Zoledronic acid			C8FE3202-AC8B-43C6-B453-0FA6344B2AFB
TCGA-B6-A0X1-01A			NO		48	Left		Axillary lymph node dissection alone		74.87.0	Nationwide Children's Hospital			TCGA-B6-A0X1-F71498	B774767E-92CC-4BD1-A7EE-6615FE09C623				Negative					Negative	Other				NO	31	26					0								Image Analysis		51FC64CD-E8C0-40DB-A91E-C4004F20A549		Scheduled Follow-up Submission
TCGA-A8-A09M-01A					75	Right Lower Outer Quadrant	Primary Tumor Field			47.97.0	Nationwide Children's Hospital	TCGA-A8-A09M-D37786	09FBDD53-0E66-4D9E-AACA-888BC15FA3CF	TCGA-A8-A09M-F40331	6B25050A-F752-4FED-A111-E3D271B3BD15	TCGA-A8-A09M-R38162	5ACACE6F-008C-433C-9F3C-EED2853291D8		Positive					Positive	Other		n/a			31	17				276	0				276	214		Exemestane			FE85BDCC-4F99-4DCA-A66B-E36047B8B872
TCGA-AR-A0TT-01A					53	Right Upper Outer Quadrant		Sentinel lymph node biopsy plus axillary dissection		72.90.0	Nationwide Children's Hospital	TCGA-AR-A0TT-D19113	3F6361BB-149D-4D35-A1E0-7968FB1EC94A	TCGA-AR-A0TT-F49517	2EA565CB-7360-4D0F-B645-52EC58950B49	TCGA-AR-A0TT-R19573	A3F2C813-7858-4900-AEE3-694EBB16901F		Positive		0			Negative	Other			1		31	2			91	48	0				211			Cytoxan		10-19%	31338066-DF90-43ED-AC11-54093D5AB9A5		Scheduled Follow-up Submission
TCGA-AC-A6IX-01A					49	Left Upper Outer Quadrant		Axillary lymph node dissection alone		334.45.0	Nationwide Children's Hospital			TCGA-AC-A6IX-F66025	23A43B78-CE3E-4306-96BB-F26BDC52FB61				Positive					Positive	Modified Radical Mastectomy				NO	31	1					0									90-99%	92DDB19C-8138-45EF-B8FA-69292A3A5F08
TCGA-AC-A6IX-06A					49	Left Upper Outer Quadrant		Axillary lymph node dissection alone		334.45.0	Nationwide Children's Hospital			TCGA-AC-A6IX-F66025	23A43B78-CE3E-4306-96BB-F26BDC52FB61				Positive					Positive	Modified Radical Mastectomy				NO	31	1					0									90-99%	92DDB19C-8138-45EF-B8FA-69292A3A5F08
TCGA-EW-A3E8-01B					60	Left Upper Outer Quadrant	Primary Tumor Field	Sentinel lymph node biopsy plus axillary dissection		255.56.0	Nationwide Children's Hospital	TCGA-EW-A3E8-D39996	6D645F63-EEF8-43F6-AC29-34CBBEC01722	TCGA-EW-A3E8-F57617	71B7D2CC-2481-4609-94CB-593371E7EE7D	TCGA-EW-A3E8-R39993	91E4B957-C918-4E13-B0E0-48ECCA77D430		Positive					Negative	Simple Mastectomy					31	18				196	0				196	165		Anastrozole			CE0787B7-4D79-4153-823B-3AC06C596C48
TCGA-A8-A079-01A					69	Left Upper Outer Quadrant	Primary Tumor Field			47.97.0	Nationwide Children's Hospital	TCGA-A8-A079-D37844	D39B1438-ADE8-40F1-A772-470F7B3FE40D	TCGA-A8-A079-F40822	5AFF0910-3B7D-408F-A464-C3E105392A8C	TCGA-A8-A079-R38176	BFA37E0C-E6C7-4667-84A9-FAD16411E814		Positive					Positive	Other		n/a			31	2			183	30	0				274	214		Cyclophosphamide			DB07FCD1-9B47-46E8-9D98-C40B8B40F82F
TCGA-B6-A0I9-01A					62	Left		No axillary staging		56.90.0	Nationwide Children's Hospital			TCGA-B6-A0I9-F12609	A410ADEE-B8AA-4E7F-BD5E-134E99D6BFEE				Indeterminate					Positive					NO	31	1					0								IHC		55E98AA1-A2F9-4E7A-A4EF-0723107D34D7		Scheduled Follow-up Submission
TCGA-BH-A0BL-01A					35	Right Upper Outer Quadrant				85.85.0	Nationwide Children's Hospital	TCGA-BH-A0BL-D59192	A18467A5-0B9F-4D1C-97E4-44F1D31AE8F3	TCGA-BH-A0BL-F59189	3F9A600B-3723-4F22-9943-AFDBE30523C5				Negative					Negative	Other					31	2			240	163	0						NO	Taxol			F2343EEB-E970-4320-BE6E-D66826512EBA
TCGA-BH-A0BL-11A					35	Right Upper Outer Quadrant				85.85.0	Nationwide Children's Hospital	TCGA-BH-A0BL-D59192	A18467A5-0B9F-4D1C-97E4-44F1D31AE8F3	TCGA-BH-A0BL-F59189	3F9A600B-3723-4F22-9943-AFDBE30523C5				Negative					Negative	Other					31	2			240	163	0						NO	Taxol			F2343EEB-E970-4320-BE6E-D66826512EBA
TCGA-GM-A3NY-01A					72	Left Upper Outer Quadrant	Primary Tumor Field	Axillary lymph node dissection alone		216.63.0	Nationwide Children's Hospital	TCGA-GM-A3NY-D40405	907FA230-9311-4125-9C9D-FA54ED976D6C	TCGA-GM-A3NY-F40403	055BBB55-226C-4908-8773-39A4E65A9E37	TCGA-GM-A3NY-R40404	7B29BB47-1F8A-4F98-ADD3-B16DEDB079F6		Positive					Positive	Lumpectomy				NO	31	19				160	0				124	82	NO	Arimidex		90-99%	039ED196-2001-4988-A6CF-2F182C5AEF77
TCGA-LL-A6FR-01A					50	Right Lower Inner Quadrant	Primary Tumor Field	Sentinel node biopsy alone		322.49.0	Nationwide Children's Hospital	TCGA-LL-A6FR-D47895	CEC73C96-5595-4A8D-8D57-498C116A7957	TCGA-LL-A6FR-F64045	37B5965A-69C8-46A2-92CE-4A03623AF4AC	TCGA-LL-A6FR-R64048	3D5B50EB-00E9-4CCE-9CCA-F0862B1AEC5E		Negative		1+	3 Point Scale		Positive	Lumpectomy				YES	31	25			195	118	0				262	230		TAXOL			1CFA2F00-9151-444A-8953-F28392ECF1FA
TCGA-LQ-A4E4-01A	YES	YES			73	Right Upper Outer Quadrant	Primary Tumor Field	Sentinel lymph node biopsy plus axillary dissection		271.56.0	Nationwide Children's Hospital	TCGA-LQ-A4E4-D37612	A6AB6FB7-5552-45E1-9CE2-F1DB3B0752D9	TCGA-LQ-A4E4-F52290	10069AFF-4C83-4D78-8926-50B590E2C1B3	TCGA-LQ-A4E4-R37611	8DA26ACA-40A2-4C08-90E0-BDECEEDE3964		Positive	3 Point Scale	1+	3 Point Scale		Positive	Modified Radical Mastectomy				NO	31	2				111	0			681	111	63		Anastrozole		90-99%	55320B32-479B-41BC-BE65-1D67496A750E	1.1
TCGA-AC-A3W7-01A					66	Right Upper Outer Quadrant		Sentinel node biopsy alone		227.60.0	Nationwide Children's Hospital	TCGA-AC-A3W7-D57848	99F4E33A-B847-43FF-98B1-80EBFB1944E9	TCGA-AC-A3W7-F57847	51E87969-0929-4751-8663-2FB10328655B				Positive					Negative	Simple Mastectomy				NO	31	27				65	0							Femara		90-99%	9802580B-82A0-4505-A6E7-6AFD5761D56B
TCGA-OL-A66P-01A					75	Right		Sentinel node biopsy alone		322.49.0	Nationwide Children's Hospital	TCGA-OL-A66P-D65245	D827B0B7-5809-4FDC-BA64-92F84625B855	TCGA-OL-A66P-F58494	09B7FC8E-A0C0-4ECB-B6D4-A185043F7DAF				Negative					Negative	Simple Mastectomy					31	11			162	71	0							Taxotere			629A29F0-BBBE-4E3C-8844-422C0ECF800E
TCGA-BH-A6R8-01A					46	Left	Primary Tumor Field			338.45.0	Nationwide Children's Hospital			TCGA-BH-A6R8-F63677	DF7231E8-9032-4F1E-88AE-B322DE8EDCFD	TCGA-BH-A6R8-R56589	03ACA3BC-B3FB-419B-91CF-87F71BB7189B		Positive					Positive	Lumpectomy					31	15					0				253	194					3B565A47-9EFB-4592-8011-139808B6A680
TCGA-B6-A2IU-01A	YES	YES			62	Right		Axillary lymph node dissection alone		177.73.0	Nationwide Children's Hospital			TCGA-B6-A2IU-F38907	63102408-1829-4144-8CE6-018FA7240B97				Positive					Positive	Modified Radical Mastectomy				NO	31	3					0			4224					image cytometry		1770335D-8691-4AAA-ABF2-BD6AB63BDD2C
TCGA-AR-A0TW-01A					50	Right Lower Outer Quadrant				72.90.0	Nationwide Children's Hospital	TCGA-AR-A0TW-D19094	E7E1F747-7022-4E16-A1E8-F80ECF30503E	TCGA-AR-A0TW-F49464	879D832D-C3F4-45C1-BAE3-73FE8D28964B				Positive					Positive	Modified Radical Mastectomy					31	2			111	62	0							Doxorubicin			DA93B3F0-B8D8-4936-AEDE-D07D62B8BA15		Scheduled Follow-up Submission
TCGA-A1-A0SM-01A					77	Left		Sentinel lymph node biopsy plus axillary dissection		72.90.0	Nationwide Children's Hospital								Positive					Negative	Modified Radical Mastectomy					31	6					0									20-29%	2C1A9C23-5A18-42D9-A8BA-7D0D3F89B2D0	2
TCGA-A7-A5ZW-01A					47	Right Upper Outer Quadrant	Primary Tumor Field	Sentinel node biopsy alone		305.50.0	Nationwide Children's Hospital	TCGA-A7-A5ZW-D50168	D46476DA-66D7-47D9-9AAA-19A388D19BAA	TCGA-A7-A5ZW-F51509	99C27BED-2BF4-4438-BFF1-18A08C754731	TCGA-A7-A5ZW-R50179	2208C54F-FD2C-457C-A3A5-E5433888EA9E		Positive	3 Point Scale		3 Point Scale		Positive	Lumpectomy				NO	31	19				269	0				252	207		Tamoxifen		90-99%	2A0E738A-19A8-4F96-A94A-6A2F5E817B18
TCGA-A8-A09T-01A					68	Left	Primary Tumor Field			47.97.0	Nationwide Children's Hospital	TCGA-A8-A09T-D37898	BDD31916-FC21-4D48-B1B5-442465133D4B	TCGA-A8-A09T-F40329	C0DB6775-BC42-4631-9AAD-006977242B0E	TCGA-A8-A09T-R38191	3B9677B4-105D-478C-BB4A-25C46395FB94		Positive					Positive	Other					31	17				122	0				92	61		Anastrozole			793E385D-C4A1-4B50-82C0-35EC53814664
TCGA-BH-A0C1-01A					61	Right	Distant Recurrence			93.85.0	Nationwide Children's Hospital	TCGA-BH-A0C1-D63402	5104D7EB-AA20-495D-B052-EA95B8DB9658	TCGA-BH-A0C1-F63399	CD476A7D-DDD8-4815-98A8-9F82F7F0D480	TCGA-BH-A0C1-R63403	B71FD2B6-D242-4DE7-8DCC-A78C429010F1		Positive					Positive	Modified Radical Mastectomy					31	7			1167	119	0			1123	101	84	YES	Cytoxan			40712052-EB2A-4CE2-AEBF-9569FF20FA69
TCGA-BH-A0C1-01B					61	Right	Distant Recurrence			93.85.0	Nationwide Children's Hospital	TCGA-BH-A0C1-D63402	5104D7EB-AA20-495D-B052-EA95B8DB9658	TCGA-BH-A0C1-F63399	CD476A7D-DDD8-4815-98A8-9F82F7F0D480	TCGA-BH-A0C1-R63403	B71FD2B6-D242-4DE7-8DCC-A78C429010F1		Positive					Positive	Modified Radical Mastectomy					31	7			1167	119	0			1123	101	84	YES	Cytoxan			40712052-EB2A-4CE2-AEBF-9569FF20FA69
TCGA-BH-A0H7-01A					65	Right	Primary Tumor Field	Axillary lymph node dissection alone		61.88.0	Nationwide Children's Hospital	TCGA-BH-A0H7-D4728	8C760D86-7F32-4842-8DB0-ADAFD53EA414	TCGA-BH-A0H7-F4737	A652B449-0747-4A34-B758-A6E67A1000F6	TCGA-BH-A0H7-R4736	8B3F8793-8DF3-477C-BFB8-CA5F68C9C608								Modified Radical Mastectomy			1	NO	31	16			232	85	0				314	274		BEVACIZUMAB (AVASTIN)/PLACEBO PROVIDED BY STUDY			2F5A5FDE-79A2-4749-8717-C8DEACE35B99
TCGA-BH-A0H7-11A					65	Right	Primary Tumor Field	Axillary lymph node dissection alone		61.88.0	Nationwide Children's Hospital	TCGA-BH-A0H7-D4728	8C760D86-7F32-4842-8DB0-ADAFD53EA414	TCGA-BH-A0H7-F4737	A652B449-0747-4A34-B758-A6E67A1000F6	TCGA-BH-A0H7-R4736	8B3F8793-8DF3-477C-BFB8-CA5F68C9C608								Modified Radical Mastectomy			1	NO	31	16			232	85	0				314	274		BEVACIZUMAB (AVASTIN)/PLACEBO PROVIDED BY STUDY			2F5A5FDE-79A2-4749-8717-C8DEACE35B99
TCGA-A2-A3XU-01A					35	Left	Regional site	Sentinel lymph node biopsy plus axillary dissection		234.53.0	Nationwide Children's Hospital	TCGA-A2-A3XU-D34710	45C67643-FF02-4C5B-874F-3D7D85A8FE9D	TCGA-A2-A3XU-F34704	71CBE6D1-7840-4A7C-AB59-CCDF29432FFA	TCGA-A2-A3XU-R34705	02DB7B9E-B9A1-471B-A309-5BFE13679395		Negative					Negative	Lumpectomy				NO	31	30			902	657	0							Xeloda			64B0EA55-762E-4C50-89E7-090F84896DD6	1.5
TCGA-BH-A28O-01A					50	Right Lower Outer Quadrant		Sentinel node biopsy alone		227.60.0	Nationwide Children's Hospital	TCGA-BH-A28O-D64239	103854BD-AAE1-4387-84DC-33377016C730	TCGA-BH-A28O-F64237	78078E02-494D-4954-BA84-31674011235A				Positive					Positive	Other				NO	31	27			430	338	0						NO	Doxorubicin			B4AE0F36-8BE1-43A2-90E7-8385589012E5
TCGA-BH-A1EO-01A					68	Right				103.78.0	Nationwide Children's Hospital								Positive					Positive	Other					31	6					0						NO				66C7C747-8CD8-4254-8A2B-B55A03B61542
TCGA-BH-A1EO-11A					68	Right				103.78.0	Nationwide Children's Hospital								Positive					Positive	Other					31	6					0						NO				66C7C747-8CD8-4254-8A2B-B55A03B61542
TCGA-D8-A27N-01A					36	Right Upper Outer Quadrant		Axillary lymph node dissection alone		147.75.0	Nationwide Children's Hospital	TCGA-D8-A27N-D29595	7055CBBE-07D0-4F99-B7A5-FC251DAE2E28	TCGA-D8-A27N-F29594	3121479E-1AAE-4F1E-98CA-0ED26BDCC3CF				Positive					Positive	Modified Radical Mastectomy				NO	31	26				68	0						NO	taxol+adriamycin+cyclophosphamide+herceptin	manual counting		63248AD4-1648-437B-A734-24428FA6E61D		Scheduled Follow-up Submission
TCGA-A2-A0YM-01A					67	Left Upper Outer Quadrant	Primary Tumor Field	Other (specify)	Sentinel lymph node biopsy and non-sentinel lymph node biopsy	74.87.0	Nationwide Children's Hospital			TCGA-A2-A0YM-F15767	5A91256B-618E-4365-9DE5-864FDFC51EE4	TCGA-A2-A0YM-R5680	9d0ac647-5f1f-4321-8e4f-dc1703bd5159		Negative					Negative	Lumpectomy			1	YES	31	30					0				126	80				<10%	BA798D11-FE3E-45CA-A48C-5CFB51B6D686		Scheduled Follow-up Submission
TCGA-S3-AA10-01A					65	Right Upper Outer Quadrant		Axillary lymph node dissection alone		379.34.0	Nationwide Children's Hospital	TCGA-S3-AA10-D67781	DA1D7D41-7834-410C-959E-8D9D35DD679C	TCGA-S3-AA10-F67528	B1B67534-2F82-46FC-896D-E6CFB68E03A2				Negative	3 Point Scale		3 Point Scale		Negative	Simple Mastectomy				NO	31	11				265	0							ANASTROZOLE	CAP scoring guideline 2010		3EEED121-D014-4AC4-B919-FD9FF79F1C3A
TCGA-A8-A07U-01A					66	Right Upper Outer Quadrant	Primary Tumor Field			56.90.0	Nationwide Children's Hospital	TCGA-A8-A07U-D37857	B33C7BC7-4100-448C-AD46-5A4BE08C2A53	TCGA-A8-A07U-F40834	144DF477-24E5-4990-931F-2038B033AB05	TCGA-A8-A07U-R38180	0D5E6892-50BD-4919-9416-C6EA578D12B6		Negative					Positive	Other		n/a			31	2			122		0				242	212		Docetaxel			BEEB610D-67BD-4206-A629-72E37543B107
TCGA-EW-A6SD-01A					32	Left Upper Outer Quadrant	Primary Tumor Field			338.45.0	Nationwide Children's Hospital	TCGA-EW-A6SD-D71030	8617823B-CDC1-4292-A1A7-F1D9B9ABBA73			TCGA-EW-A6SD-R71031	DD24B5DA-6930-49C2-80AD-BC5FF24B767B		Negative					Negative	Lumpectomy					31	14			198	86	0				288	239		TCH		<10%	F16CEE63-49FD-4C43-8883-08C9244DAA18
TCGA-AO-A03N-01B	YES	NO	NO		59	Left		Sentinel lymph node biopsy plus axillary dissection		80.83.0	Nationwide Children's Hospital	TCGA-AO-A03N-D20931	1B00197C-7F84-4429-80E9-471F087D8753	TCGA-AO-A03N-F20915	117BE088-A51C-4E7F-B00B-919FF76F2596										Modified Radical Mastectomy				NO	31	24				1857	0			1645				Vinorelbine			FA48972D-6821-48DB-A39A-1835A99D395A		Scheduled Follow-up Submission
TCGA-C8-A26V-01A					47	Right	Regional site			147.75.0	Nationwide Children's Hospital	TCGA-C8-A26V-D70800	10D4E1C4-0036-44D9-8206-D14CECDEA307	TCGA-C8-A26V-F70799	505ACEFD-F363-4529-B80D-839879624DF1	TCGA-C8-A26V-R70801	8A854D11-9805-4A1B-BC0A-6018147BD138		Positive					Positive	Modified Radical Mastectomy					31	9			613	247	0				247	212		Tamoxifen			23D4FB0B-E0CE-464C-9AF3-ADEDE6577D15
TCGA-D8-A1JD-01A					41	Left Upper Outer Quadrant	Primary Tumor Field	Axillary lymph node dissection alone		109.88.0	Nationwide Children's Hospital	TCGA-D8-A1JD-D65321	32787263-6D4A-4283-B7C7-50D3650A330D	TCGA-D8-A1JD-F20844	D3EFEE22-D62C-42F4-B23C-E08897B69A53	TCGA-D8-A1JD-R20846	1EE12D22-7FFD-4B4B-AB50-8F43C4E58C30		Positive					Positive	Modified Radical Mastectomy					31	19			113	50	0				183	151		cyclophosphamide	manual counting		4BA479E5-F30E-45A1-9014-B9FA1049EE40		Scheduled Follow-up Submission
TCGA-BH-A0C0-01A					62	Left	Primary Tumor Field	Axillary lymph node dissection alone		61.88.0	Nationwide Children's Hospital	TCGA-BH-A0C0-D4514	7E66711C-BC10-4345-92B8-220DF4EE8F19	TCGA-BH-A0C0-F4518	C4A30038-2C06-4BBC-B071-677AEB2DD359	TCGA-BH-A0C0-R4517	E34524B4-285D-4250-BFF1-FC7F8FB4999D								Other			1	NO	31	16				158	0				249	204		ARIMIDEX			B4600D2C-5BDA-4D95-9B49-880F954CFB10
TCGA-BH-A0C0-11A					62	Left	Primary Tumor Field	Axillary lymph node dissection alone		61.88.0	Nationwide Children's Hospital	TCGA-BH-A0C0-D4514	7E66711C-BC10-4345-92B8-220DF4EE8F19	TCGA-BH-A0C0-F4518	C4A30038-2C06-4BBC-B071-677AEB2DD359	TCGA-BH-A0C0-R4517	E34524B4-285D-4250-BFF1-FC7F8FB4999D								Other			1	NO	31	16				158	0				249	204		ARIMIDEX			B4600D2C-5BDA-4D95-9B49-880F954CFB10
TCGA-A7-A26J-01A					49	Left		Sentinel lymph node biopsy plus axillary dissection		142.78.0	Nationwide Children's Hospital	TCGA-A7-A26J-D30819	486CE20D-4F3C-40CA-B3BB-95A9F2BC54F7	TCGA-A7-A26J-F39793	33485A24-DB2A-469D-BF9A-D0B33DF4A20E				Positive	3 Point Scale		3 Point Scale		Positive	Simple Mastectomy				NO	31	1				92	0						NO	Tamoxifen		90-99%	9541F009-B572-4C68-8178-41577B30E788		Scheduled Follow-up Submission
TCGA-A7-A26J-01B					49	Left		Sentinel lymph node biopsy plus axillary dissection		142.78.0	Nationwide Children's Hospital	TCGA-A7-A26J-D30819	486CE20D-4F3C-40CA-B3BB-95A9F2BC54F7	TCGA-A7-A26J-F39793	33485A24-DB2A-469D-BF9A-D0B33DF4A20E				Positive	3 Point Scale		3 Point Scale		Positive	Simple Mastectomy				NO	31	1				92	0						NO	Tamoxifen		90-99%	9541F009-B572-4C68-8178-41577B30E788		Scheduled Follow-up Submission
TCGA-A8-A08O-01A					45	Right				61.88.0	Nationwide Children's Hospital	TCGA-A8-A08O-D37784	A70656EE-B142-4029-AB38-FAC922222B5A	TCGA-A8-A08O-F40848	A5B49570-AA8E-44E1-9B60-EF845AFFDC60				Positive					Positive	Other		n/a			31	2				60	0			762				Ibandronate			AEF5D4C8-8523-4055-8F6D-D369B5025E84
TCGA-EW-A1PB-01A					70	Right Upper Outer Quadrant		Axillary lymph node dissection alone		117.78.0	Nationwide Children's Hospital			TCGA-EW-A1PB-F29107	3AAF57DA-E30C-45A6-B7DD-53CC5EA84417				Negative	3 Point Scale		3 Point Scale		Negative	Simple Mastectomy				NO	31	8					0									<10%	A087A7BB-F707-49B2-A345-576A9BC78D27		Scheduled Follow-up Submission
TCGA-AR-A24T-01A					46	Right Upper Outer Quadrant	Primary Tumor Field	Sentinel lymph node biopsy plus axillary dissection		142.78.0	Nationwide Children's Hospital	TCGA-AR-A24T-D31508	6582CFB0-38DB-40AA-B9DB-3E4241EE51EF	TCGA-AR-A24T-F49463	71B7C342-2D87-4E59-B1DA-18539B19FA10	TCGA-AR-A24T-R31504	6E123228-9066-4185-98D4-BF4F80D1BE4A		Positive					Positive	Simple Mastectomy			1		31	2			157	94	0				225	189		Paclitaxel		10-19%	3558F432-5E77-43FD-98CF-1F09112877BD		Scheduled Follow-up Submission
TCGA-A1-A0SE-01A					56	Left Upper Outer Quadrant		Sentinel lymph node biopsy plus axillary dissection		72.90.0	Nationwide Children's Hospital								Positive		3+			Positive	Modified Radical Mastectomy					31	6					0									80-89%	2501859E-5846-40A9-BB7D-ACEB1EFF0F18	2
TCGA-AR-A1AT-01A					62	Left Upper Outer Quadrant		Sentinel lymph node biopsy plus axillary dissection		96.78.0	Nationwide Children's Hospital	TCGA-AR-A1AT-D22152	022F99BE-9A3B-44EF-94DE-B304CF259B65	TCGA-AR-A1AT-F22148	D7B56DE8-A5E4-4524-80B2-C2260F0A0054	TCGA-AR-A1AT-R22149	53C226CF-2609-447A-8D85-B49B4E12C7ED		Positive					Positive	Other				YES	31	1					0							Trastuzumab		<10%	20601768-8082-4C6C-AEED-1823080060C1		Scheduled Follow-up Submission
TCGA-C8-A12K-01A					80	Right Upper Inner Quadrant		Other (specify)	Pateys surgery	85.85.0	Nationwide Children's Hospital														Other				NO	31	12					0										E2533810-657C-4370-9FAA-9857C01DEA6F
TCGA-A7-A26H-01A			NO		72	Left		Sentinel lymph node biopsy plus axillary dissection		142.78.0	Nationwide Children's Hospital	TCGA-A7-A26H-D29622	5ABD5AE2-14DC-45D0-8CD9-C1CE4EE9A336	TCGA-A7-A26H-F39890	5F40A4B3-5B64-42A8-BC00-6DCDCBE7883D				Positive					Negative	Other				NO	31	5			296	44	0			311			NO	Anastrozole		90-99%	EC134AD2-0648-4315-BB00-4C46F6FDAA68	2.2	Scheduled Follow-up Submission
TCGA-D8-A1J9-01A					48	Left Upper Outer Quadrant		Axillary lymph node dissection alone		109.88.0	Nationwide Children's Hospital			TCGA-D8-A1J9-F20944	9648DFD3-BFF5-4CC5-BE38-C1D57FEFE0D7				Positive					Negative	Modified Radical Mastectomy					31	19					0								manual counting		879C53AB-BC8B-4A80-B2B9-8B69AAB33558		Scheduled Follow-up Submission
TCGA-AO-A0JJ-01A					54	Left	Regional site	Sentinel lymph node biopsy plus axillary dissection		61.88.0	Nationwide Children's Hospital	TCGA-AO-A0JJ-D2974	9b8965e1-1b43-431d-9e0a-34e799297fae	TCGA-AO-A0JJ-F15493	0466F12C-73BA-4B3A-9794-698974812CF6	TCGA-AO-A0JJ-R2967	dbd25158-9d0f-4bfc-aa40-b2b6ac9685ea								Modified Radical Mastectomy			1	NO	31	22				154	0				256	217		Letrozole (Femara)			E4717AD5-5959-4EA0-8931-61A1C99EE611		Scheduled Follow-up Submission
TCGA-BH-A0C7-01A					48	Left				85.85.0	Nationwide Children's Hospital	TCGA-BH-A0C7-D59181	04AB53D8-4D37-4845-B139-414A9D08CFC3	TCGA-BH-A0C7-F59178	DE59E19C-C2B2-44A8-A313-696DFCDB91EE				Positive					Negative	Simple Mastectomy					31	2			113	50	0						NO	Taxol			B45E8A2E-D269-45FB-97E6-854152722339
TCGA-BH-A0C7-01B					48	Left				85.85.0	Nationwide Children's Hospital	TCGA-BH-A0C7-D59181	04AB53D8-4D37-4845-B139-414A9D08CFC3	TCGA-BH-A0C7-F59178	DE59E19C-C2B2-44A8-A313-696DFCDB91EE				Positive					Negative	Simple Mastectomy					31	2			113	50	0						NO	Taxol			B45E8A2E-D269-45FB-97E6-854152722339
TCGA-E2-A15S-01A					34	Left Upper Outer Quadrant	Regional site	Sentinel lymph node biopsy plus axillary dissection		85.85.0	Nationwide Children's Hospital	TCGA-E2-A15S-D19139	F323125C-76E3-4E3E-AFB8-2355B2C63C47	TCGA-E2-A15S-F19135	E148F43C-C230-4941-9B16-BF0B9D4C9AF4	TCGA-E2-A15S-R19141	404E4F73-F254-4DB0-A932-852FCB819377		Positive					Negative	Simple Mastectomy			1	NO	31	16					0				247	191	NO	Taxol			4777E19F-7C19-408F-8B52-12B29E2747A9		Scheduled Follow-up Submission
TCGA-C8-A12P-01A					55	Left				85.85.0	Nationwide Children's Hospital			TCGA-C8-A12P-F20267	E314B6FE-D28B-4608-B290-CC684F3A2B1A				Negative					Negative	Other					31	9					0										60DFC389-A512-40F5-9510-51D0B7C921F6		Scheduled Follow-up Submission
TCGA-A2-A0CL-01A					37	Right Lower Outer Quadrant	Primary Tumor Field	Axillary lymph node dissection alone		85.85.0	Nationwide Children's Hospital	TCGA-A2-A0CL-D39784	3CD728D5-9818-47B3-AED9-099463BAC77E	TCGA-A2-A0CL-F59313	EC083639-8177-453D-8451-0BF534DE6082	TCGA-A2-A0CL-R7419	5579f19f-ae39-4394-8043-dd64e58b60f8		Positive					Positive	Modified Radical Mastectomy		Antimetabolite	1	NO	31	8			168	126	0				255	206		Gemcitabine		20-29%	DB875FA6-E9D7-45F5-95CB-2FC85D7AC72D		Scheduled Follow-up Submission
TCGA-AC-A2FG-01A					79	Left Upper Outer Quadrant		Sentinel lymph node biopsy plus axillary dissection		155.73.0	Nationwide Children's Hospital	TCGA-AC-A2FG-D43222	1263ADA3-9E75-48E3-AC3C-891A3C9AF9AB	TCGA-AC-A2FG-F43221	06360A31-72BE-4B48-BC93-870CEB0E9BED				Positive					Negative	Modified Radical Mastectomy				YES	31	15				39	0						NO	Arimidex		90-99%	326B7E09-9E98-461B-B3A5-E6633F8AF664
TCGA-AC-A2FG-11A					79	Left Upper Outer Quadrant		Sentinel lymph node biopsy plus axillary dissection		155.73.0	Nationwide Children's Hospital	TCGA-AC-A2FG-D43222	1263ADA3-9E75-48E3-AC3C-891A3C9AF9AB	TCGA-AC-A2FG-F43221	06360A31-72BE-4B48-BC93-870CEB0E9BED				Positive					Negative	Modified Radical Mastectomy				YES	31	15				39	0						NO	Arimidex		90-99%	326B7E09-9E98-461B-B3A5-E6633F8AF664
TCGA-D8-A1XR-01A					56	Right Upper Outer Quadrant		Axillary lymph node dissection alone		124.80.0	Nationwide Children's Hospital	TCGA-D8-A1XR-D29450	5484F965-9C70-444A-8C52-BE87ECFA4EE5	TCGA-D8-A1XR-F29451	1B14AB2D-AA4F-4BF6-9AE3-88DD7EF231A1				Positive					Positive	Modified Radical Mastectomy				NO	31	6			168	105	0						NO	adriamycin+cyclophosphamide	% IHC		458D759F-FF11-4FEA-AEF6-C3C51A6A2C42		Scheduled Follow-up Submission
TCGA-AO-A0JI-01A					56	Left		Sentinel lymph node biopsy plus axillary dissection		61.88.0	Nationwide Children's Hospital	TCGA-AO-A0JI-D5930	ddd8f77f-5e9f-443d-afba-17082d2bdb03	TCGA-AO-A0JI-F19410	EE8F19C6-3BDA-4398-96EF-7D72609886E1										Modified Radical Mastectomy				YES	31	12			196	154	0							Paclitaxel			300675AC-7B64-4A12-A60F-45DC02414720		Scheduled Follow-up Submission
TCGA-A2-A0EV-01A					80	Left		Sentinel node biopsy alone		56.90.0	Nationwide Children's Hospital			TCGA-A2-A0EV-F13712	785B386C-75E3-49AA-A871-A8DD80C39466				Positive					Positive	Lumpectomy				YES	31	10					0									90-99%	2B3D639A-A042-4ADB-8F67-2D580C1D515B		Scheduled Follow-up Submission
TCGA-A7-A0CE-01A					57	Left	Primary Tumor Field	Sentinel lymph node biopsy plus axillary dissection		47.97.0	Nationwide Children's Hospital	TCGA-A7-A0CE-D3143	9464606d-3ece-43bd-aad1-7126b43626c9	TCGA-A7-A0CE-F39153	EAEC135D-263E-4230-97DF-BFEB960B4161	TCGA-A7-A0CE-R2979	03d6bcae-2761-4649-a609-07dd7316aa81								Lumpectomy			1	YES	31	14			161	119	0				238	189		Taxol			4D4B8969-1BEC-4B62-999F-4563F038AB00
TCGA-A7-A0CE-11A					57	Left	Primary Tumor Field	Sentinel lymph node biopsy plus axillary dissection		47.97.0	Nationwide Children's Hospital	TCGA-A7-A0CE-D3143	9464606d-3ece-43bd-aad1-7126b43626c9	TCGA-A7-A0CE-F39153	EAEC135D-263E-4230-97DF-BFEB960B4161	TCGA-A7-A0CE-R2979	03d6bcae-2761-4649-a609-07dd7316aa81								Lumpectomy			1	YES	31	14			161	119	0				238	189		Taxol			4D4B8969-1BEC-4B62-999F-4563F038AB00
TCGA-LL-A441-01A					62	Right Upper Outer Quadrant	Primary Tumor Field	Sentinel lymph node biopsy plus axillary dissection		255.56.0	Nationwide Children's Hospital	TCGA-LL-A441-D36592	EAC2A2A2-E81E-4A91-A483-5055C21238F3	TCGA-LL-A441-F46386	942378CA-13DA-43CB-9FE1-A95010C3B668	TCGA-LL-A441-R46385	62DCBDEC-4D8A-446D-B28A-643F6BB679F7		Negative	3 Point Scale		3 Point Scale		Negative	Lumpectomy				YES	31	7			133	61	0				216	153		Cytoxan			D2266E32-E6C6-492A-AC45-C1554FDAE2D4
TCGA-AC-A5EI-01A					88	Right Upper Outer Quadrant		Sentinel node biopsy alone		288.54.0	Nationwide Children's Hospital			TCGA-AC-A5EI-F60184	9AE528AA-45A7-458E-8361-B5B6123CE23D				Positive					Positive	Simple Mastectomy				NO	31	31					0									90-99%	849E9B86-2EA0-4EFB-9E71-6EAE885DA371
TCGA-A2-A0CW-01A					67	Right		Sentinel lymph node biopsy plus axillary dissection		85.85.0	Nationwide Children's Hospital	TCGA-A2-A0CW-D7229	c36b63ba-4a02-4afd-881a-952408223aa4	TCGA-A2-A0CW-F70690	06E8B614-ABD0-4B06-BC35-0FD8FA585C60				Positive					Positive	Lumpectomy				YES	31	2				156	0							Anastrozole		90-99%	FA0E0B21-FDAD-4B21-AA31-881574A9CA8C		Scheduled Follow-up Submission
TCGA-B6-A0RG-01A					26	Left		Axillary lymph node dissection alone		61.88.0	Nationwide Children's Hospital			TCGA-B6-A0RG-F13793	81C89D48-283C-43B0-97AE-F30BB640272D				Negative					Negative	Lumpectomy				NO	31	12					0								IHC		DA546D11-F394-4076-A4F3-F2ED18BCE344		Scheduled Follow-up Submission
TCGA-AO-A1KS-01A					69	Left	Primary Tumor Field	Sentinel node biopsy alone		109.88.0	Nationwide Children's Hospital	TCGA-AO-A1KS-D9873	5cf6039b-6a9e-45da-a518-f9ed69ee620f	TCGA-AO-A1KS-F21777	507BCF20-7BA4-4C69-9D6F-41883512FAD1	TCGA-AO-A1KS-R9876	dc16cc6f-20a3-44d0-b0ff-794d86ead108			4 Point Scale		4 Point Scale			Lumpectomy			1	YES	31	20				155	0						NO	Arimidex			D1034A9E-C4B1-4365-A266-176A7F4FCEDA		Scheduled Follow-up Submission
TCGA-LD-A7W6-01A					54	Right Upper Inner Quadrant		Axillary lymph node dissection alone		360.42.0	Nationwide Children's Hospital	TCGA-LD-A7W6-D56359	98AA201E-F562-487E-A7DC-EB64623A1085	TCGA-LD-A7W6-F69193	51CDD6F7-8467-42F0-8B9F-4C3BD0C4AFD9				Positive	3 Point Scale		3 Point Scale		Positive	Modified Radical Mastectomy				NO	31	30				146	0							Letrozole		90-99%	5F31DBEA-0C16-451A-B0AE-B1D1BC8652B4
TCGA-EW-A1PC-01B					66	Left		Sentinel node biopsy alone		216.63.0	Nationwide Children's Hospital	TCGA-EW-A1PC-D29682	4784F718-8BC9-4960-AF35-7D27BE174EA2	TCGA-EW-A1PC-F29681	A626E120-7532-413F-8810-E8EA00F76B76				Positive	3 Point Scale	3+	3 Point Scale		Positive	Modified Radical Mastectomy				YES	31	26				98	0						NO	Tamoxifen		90-99%	FC597D00-4804-418A-A45A-A7351523068B		Scheduled Follow-up Submission
TCGA-C8-A1HI-01A					40	Right		Axillary lymph node dissection alone		103.78.0	Nationwide Children's Hospital			TCGA-C8-A1HI-F19099	41B909BA-C457-4643-9821-7881F6EA6087				Positive					Positive	Other					31	2					0						NO				DC2C701B-C7AF-4181-AAAF-E8A064FD8FB0		Scheduled Follow-up Submission
TCGA-AN-A0FF-01A					32	Left Upper Outer Quadrant		Axillary lymph node dissection alone		56.90.0	Nationwide Children's Hospital			TCGA-AN-A0FF-F68943	9B3D0EEE-F464-4E46-B81D-A11ED9A05517				Positive		3+			Positive	Modified Radical Mastectomy				NO	31	23					0								dextran coated charcoal	90-99%	AE210F0D-D9AD-47D9-BAC3-6C3E20B4D25C
TCGA-B6-A400-01A					43	Left Upper Outer Quadrant		Sentinel lymph node biopsy plus axillary dissection		239.55.0	Nationwide Children's Hospital			TCGA-B6-A400-F59655	59780D28-66A6-427C-9E17-691B40C10281				Negative	4 Point Scale	1+	4 Point Scale		Negative	Lumpectomy				NO	31	3					0									<10%	A75C1A8D-4CFF-48F2-8BF6-B7CEA4CD22A3
TCGA-AR-A2LQ-01A					59	Right Upper Outer Quadrant	Primary Tumor Field	Sentinel lymph node biopsy plus axillary dissection		177.73.0	Nationwide Children's Hospital	TCGA-AR-A2LQ-D37599	409752F6-5669-4168-8F31-54550EB34917	TCGA-AR-A2LQ-F37558	4A4F9815-80A4-4954-A2E6-416F0316C65A	TCGA-AR-A2LQ-R37595	BC8640F7-F340-4B7A-8B3E-7FD66D6DA282		Positive					Positive	Simple Mastectomy					31	6				176	0				240	201	NO	Anastrozole		70-79%	1F6AF498-DE0C-447A-9563-0FB624FAEC1B
TCGA-D8-A1Y0-01A					65	Left	Primary Tumor Field	Axillary lymph node dissection alone		124.80.0	Nationwide Children's Hospital	TCGA-D8-A1Y0-D30082	2E4B995D-B134-417F-8651-39114BCED462	TCGA-D8-A1Y0-F30080	A1CF1328-C069-4C74-80C9-4C569F082DC1	TCGA-D8-A1Y0-R30081	432151C6-E47F-4973-B1B2-57622A49678E		Positive					Positive	Modified Radical Mastectomy					31	2			167	62	0				232	201	NO	cyclophosphamide+methotrexatum+fluorouracillum	manual counting		39CB2C7B-0774-46E8-B6BE-B8C7E4450EA6		Scheduled Follow-up Submission
TCGA-AO-A0JD-01A					59	Left	Regional site	Sentinel lymph node biopsy plus axillary dissection		61.88.0	Nationwide Children's Hospital	TCGA-AO-A0JD-D3188	bf1780f4-0ad9-4861-ab51-bf0698571363	TCGA-AO-A0JD-F15487	A1246D11-43BB-492B-AE6E-FDB6790A8599	TCGA-AO-A0JD-R3186	aaf5b702-d5e8-428b-bab0-d0534119f010								Modified Radical Mastectomy			1	NO	31	22			104	62	0				244	195		DOXORUBICIN			0334027B-24F1-49BF-9B9B-DA0F68210F56		Scheduled Follow-up Submission
TCGA-E9-A1RH-01A					63	Right Lower Outer Quadrant	Primary Tumor Field	Axillary lymph node dissection alone		142.78.0	Nationwide Children's Hospital	TCGA-E9-A1RH-D30657	395299B4-0924-44F0-B3B9-48F4A1672618	TCGA-E9-A1RH-F39538	8ADAFC52-311D-493C-A40D-FBC3E4824415	TCGA-E9-A1RH-R56942	F462C0FF-6B78-4FDE-A54F-8C581AB9B688								Lumpectomy				NO	31	24			214	11	0				107	63	NO	5-Fluorouracil			917FA4ED-2B6E-4C75-A8FB-999596048508		Scheduled Follow-up Submission
TCGA-E9-A1RH-11A					63	Right Lower Outer Quadrant	Primary Tumor Field	Axillary lymph node dissection alone		142.78.0	Nationwide Children's Hospital	TCGA-E9-A1RH-D30657	395299B4-0924-44F0-B3B9-48F4A1672618	TCGA-E9-A1RH-F39538	8ADAFC52-311D-493C-A40D-FBC3E4824415	TCGA-E9-A1RH-R56942	F462C0FF-6B78-4FDE-A54F-8C581AB9B688								Lumpectomy				NO	31	24			214	11	0				107	63	NO	5-Fluorouracil			917FA4ED-2B6E-4C75-A8FB-999596048508		Scheduled Follow-up Submission
TCGA-E2-A1IN-01A					60	Right	Primary Tumor Field	Sentinel node biopsy alone		109.88.0	Nationwide Children's Hospital	TCGA-E2-A1IN-D20324	F7685815-0BF1-443B-9F43-01B6887E6A92	TCGA-E2-A1IN-F20323	14834E52-B0E0-43D7-B13B-32A3D0D390E3	TCGA-E2-A1IN-R20326	EF81F606-FAFB-46F1-82DB-B3285D7A9803		Positive					Positive	Lumpectomy			1	NO	31	4				103	0				101	57	NO	Arimidex	allred score 5+3=8		D491EEA8-7B5D-4620-BD99-DA3D6AF1F642		Scheduled Follow-up Submission
TCGA-BH-A0DT-01A					41	Right				93.85.0	Nationwide Children's Hospital	TCGA-BH-A0DT-D59152	0F068054-E971-4558-AD6A-D6CD1FB72167	TCGA-BH-A0DT-F59149	547CCD51-6C97-4C0B-9A88-08154FBB4C87				Positive					Positive	Other					31	1			287	118	0						NO	Cytoxan			3A5D6EEA-49B2-4450-A9A6-0023B00A5108
TCGA-BH-A0DT-11A					41	Right				93.85.0	Nationwide Children's Hospital	TCGA-BH-A0DT-D59152	0F068054-E971-4558-AD6A-D6CD1FB72167	TCGA-BH-A0DT-F59149	547CCD51-6C97-4C0B-9A88-08154FBB4C87				Positive					Positive	Other					31	1			287	118	0						NO	Cytoxan			3A5D6EEA-49B2-4450-A9A6-0023B00A5108
TCGA-B6-A1KF-01A					68	Right Lower Outer Quadrant		Axillary lymph node dissection alone		109.88.0	Nationwide Children's Hospital			TCGA-B6-A1KF-F15739	61E927F2-F19E-4BA3-8DF6-318C8BB8E3A5				Negative					Negative	Other				NO	31	29					0						NO				1E58651F-65DE-4F43-A7EE-9D9724AAEA18		Scheduled Follow-up Submission
TCGA-AO-A12E-01A					51	Right	Regional site	Axillary lymph node dissection alone		80.83.0	Nationwide Children's Hospital	TCGA-AO-A12E-D5976	6aaca2a6-421f-4cc8-a564-961b2eeef1e4	TCGA-AO-A12E-F19431	1CA8FF89-A5C5-4D7A-B043-F371A82CEA7C	TCGA-AO-A12E-R5896	2f7dc558-30d7-46dc-8dfa-b8f59d9588bf								Modified Radical Mastectomy			1	YES	31	12			127	85	0				288	251		Doxorubicin			8B2A4611-2EA3-4686-9225-1744511F1831		Scheduled Follow-up Submission
TCGA-C8-A12O-01A					50	Left		Axillary lymph node dissection alone		85.85.0	Nationwide Children's Hospital			TCGA-C8-A12O-F20261	0FF852B6-07CA-4E22-8B58-A6EC5D9BC503				Positive					Positive	Other					31	9					0										EA0AB916-B288-41F8-9762-0C2ABE9F8885		Scheduled Follow-up Submission
TCGA-E2-A14X-01A					55	Right Upper Outer Quadrant	Primary Tumor Field	Sentinel lymph node biopsy plus axillary dissection		85.85.0	Nationwide Children's Hospital	TCGA-E2-A14X-D18864	A9E35661-F258-4F47-B234-1EEDC19E838C	TCGA-E2-A14X-F18857	02DF16E7-CE1F-4746-952C-B32F958EF48B	TCGA-E2-A14X-R18859	F63A992C-A3FF-4949-86BE-6556F627B1A3		Negative					Negative	Lumpectomy			1	NO	31	4			199	111	0				271	218	NO	paclitaxel	Allred score 0+0 = 0		67699709-121E-4C73-A6C1-CEFC0BDC0E56		Scheduled Follow-up Submission
TCGA-D8-A1XJ-01A					76	Left Lower Outer Quadrant		Axillary lymph node dissection alone		124.80.0	Nationwide Children's Hospital	TCGA-D8-A1XJ-D29988	B04923EA-FC7E-4EFA-B2B2-65D43ABA760D	TCGA-D8-A1XJ-F29989	D3BBE7A7-94B5-469E-8789-88FFAE42853C				Positive					Positive	Modified Radical Mastectomy					31	31				85	0						NO	tamoxifen	manual counting		E25F552C-D91F-41F3-B747-D904CCC850A9		Scheduled Follow-up Submission
TCGA-AN-A0FN-01A					61	Right Lower Outer Quadrant		Axillary lymph node dissection alone		56.90.0	Nationwide Children's Hospital			TCGA-AN-A0FN-F68953	16502F77-C804-49D7-99F6-20F92037D659				Positive		1+			Positive	Modified Radical Mastectomy				NO	31	23					0								dextran coated charcoal	90-99%	31707406-B9FB-45BF-9069-40498D364CC3
TCGA-A7-A426-01A					50	Right	Regional site	Sentinel lymph node biopsy plus axillary dissection		255.56.0	Nationwide Children's Hospital	TCGA-A7-A426-D41740	E049A833-72A0-4C05-8F37-8DB9DDE9746D	TCGA-A7-A426-F41743	7D3C9088-BC36-4448-A5A3-B00DD0B124F0	TCGA-A7-A426-R41742	34569FAF-40C8-41C8-8CD2-79E24B283462		Positive	3 Point Scale	3+	3 Point Scale		Positive	Simple Mastectomy				YES	31	26				258	0				257	220		Tamoxifen		70-79%	BE06054A-3681-4114-A9B2-3999A6CE245A
TCGA-AN-A049-01A					62	Left Upper Outer Quadrant		No axillary staging		47.97.0	Nationwide Children's Hospital			TCGA-AN-A049-F68978	FE2AC366-DA1D-44C8-ACF7-B1703E8DAFC4				Positive		2+		Modified radical mastectomy	Positive	Simple Mastectomy				NO	31	24					0								Allred (Biocare)		C697D475-875B-4235-8E9A-83D9BE50534E
TCGA-OL-A5RV-01A					43	Right Upper Outer Quadrant	Regional site	Axillary lymph node dissection alone		296.54.0	Nationwide Children's Hospital	TCGA-OL-A5RV-D65256	D588C324-FD32-4951-B780-BE01F71AA7DD	TCGA-OL-A5RV-F56564	AA52F64A-01A5-47BB-A85F-26B25B7BAED7	TCGA-OL-A5RV-R65257	09E25775-2A38-48D7-8505-A90B508ACD39		Positive					Positive	Modified Radical Mastectomy				NO	31	14			161	63	0				249	202		Paclitaxel		90-99%	709B365A-4F23-40A9-8BD5-371F47AB720F
TCGA-AR-A252-01A					50	Left Lower Outer Quadrant	Primary Tumor Field	Sentinel lymph node biopsy plus axillary dissection		142.78.0	Nationwide Children's Hospital	TCGA-AR-A252-D31836	A51DB83F-929F-44F2-B30E-2A608BEFBB50	TCGA-AR-A252-F49510	976FA976-190E-4CEA-AFE1-D220E1EF1524	TCGA-AR-A252-R31832	DA3119FA-2C7A-401D-A8D4-5E9BC5396C15		Positive					Positive	Other			1	YES	31	2				116	0				159	118		Tamoxifen		70-79%	E812D7AB-75D0-4EFF-A50A-6F60B1228811		Scheduled Follow-up Submission
TCGA-E2-A15P-01A					61	Right Upper Outer Quadrant	Primary Tumor Field	Sentinel node biopsy alone		85.85.0	Nationwide Children's Hospital	TCGA-E2-A15P-D19145	F89D7938-6B30-4AF5-84F0-30B5D1B87F69	TCGA-E2-A15P-F19144	FF988B0B-A019-44FD-8CB3-0DEF979A82D9	TCGA-E2-A15P-R19147	747DC091-0514-4945-B09E-1CAD551849C8		Positive					Positive	Lumpectomy			1	NO	31	16			220	105	0				98	51	NO	Arimidex	Allred score 5+3 = 8		3C7C9407-EB27-4F47-9ECF-8E06E7D933CD		Scheduled Follow-up Submission
TCGA-BH-A0W7-01A					49	Left Upper Outer Quadrant	Primary Tumor Field	Sentinel node biopsy alone		85.85.0	Nationwide Children's Hospital	TCGA-BH-A0W7-D34077	F892639C-D682-4FC7-AE4B-6FF21F295085	TCGA-BH-A0W7-F34073	F6B25172-02C5-489E-9061-B951EE902CB0	TCGA-BH-A0W7-R34078	BEFB5D3C-A0C6-4F5D-8E1A-C0561BEFCEB9		Positive					Positive	Other					31	29			1324	1171	0				229	168		Arimidex			895ED57C-75E7-49AB-80F2-E065F51BBF2E		Scheduled Follow-up Submission
TCGA-BH-A0W4-01A					46	Left Upper Outer Quadrant				74.87.0	Nationwide Children's Hospital			TCGA-BH-A0W4-F34069	A10FFD93-E9C3-4083-A4E6-F61D9E83E9C9				Positive					Positive	Other					31	29					0										A9DADB4A-6F63-4FB2-98FA-CEE9300AA379		Scheduled Follow-up Submission
TCGA-BH-A0DS-01A					71	Right	Primary Tumor Field	Sentinel lymph node biopsy plus axillary dissection		61.88.0	Nationwide Children's Hospital	TCGA-BH-A0DS-D4567	65485195-3F60-4437-BB26-7445C4269376	TCGA-BH-A0DS-F4573	2A2365B3-1F58-4BEF-B339-62EC3E2DF7E0	TCGA-BH-A0DS-R4570	9D8636BF-0DD9-40C4-830F-ACEF70BE5B34								Other			1	NO	31	16				78	0					245		TAXOTERE			A6CF0803-7331-41B1-8534-62597BE1A8B5
TCGA-OL-A5DA-01A					61	Right Upper Outer Quadrant		Sentinel node biopsy alone		288.54.0	Nationwide Children's Hospital			TCGA-OL-A5DA-F55440	23A668B0-A47F-47D6-BCDF-8E2A5C754314				Positive					Positive	Other					31	10					0									60-69%	A76D560D-1785-4A23-982C-A66AA470BFB2			1
TCGA-D8-A1X7-01A					40	Right Upper Outer Quadrant		Axillary lymph node dissection alone		124.80.0	Nationwide Children's Hospital	TCGA-D8-A1X7-D29986	F5CBC7F0-42CF-407F-8F28-441B89B91D06	TCGA-D8-A1X7-F29985	DBB236CA-AAC6-48BD-B702-95BA93EBE283				Positive					Positive	Simple Mastectomy					31	31			134	64	0						NO	doxorubicine+cyclophosphamide+tamoxifen	manual counting		750D3F33-97E2-45FA-A807-94D394F25432		Scheduled Follow-up Submission
TCGA-A2-A0CK-01A	YES	NO			60	Right	Regional site	Sentinel lymph node biopsy plus axillary dissection		227.60.0	Nationwide Children's Hospital	TCGA-A2-A0CK-D42399	DB784ADC-6137-423C-8F1C-5832E32592E5	TCGA-A2-A0CK-F42396	4AC2C5F2-CF56-492A-B095-C6D9640612E1	TCGA-A2-A0CK-R32653	57C35411-3766-4C37-B699-47F58743FD98	Negative	Positive	3 Point Scale	3+	3 Point Scale	Modified radical mastectomy	Positive	Lumpectomy				NO	31	18					0		1409	1364	280	243	NO	E-75		40-49%	35585CFD-8A94-4CFA-9E51-8F2C7A8504E5
TCGA-BH-A18F-01A					50	Right Lower Outer Quadrant	Regional site	Sentinel node biopsy alone		93.85.0	Nationwide Children's Hospital	TCGA-BH-A18F-D59197	60625A51-8E18-4F71-B2D7-27A2C7FB9C2C	TCGA-BH-A18F-F59193	092E4639-8456-481D-8DF3-0C60E99CDCB5	TCGA-BH-A18F-R59195	808DBF60-68C3-472B-B148-479088B903AE		Positive	3 Point Scale	3+	3 Point Scale		Positive	Other					31	2			189	101	0				233	224		Cytoxan		70-79%	52112990-902D-408B-AC23-EF5DD5183241
TCGA-BH-A18F-11A					50	Right Lower Outer Quadrant	Regional site	Sentinel node biopsy alone		93.85.0	Nationwide Children's Hospital	TCGA-BH-A18F-D59197	60625A51-8E18-4F71-B2D7-27A2C7FB9C2C	TCGA-BH-A18F-F59193	092E4639-8456-481D-8DF3-0C60E99CDCB5	TCGA-BH-A18F-R59195	808DBF60-68C3-472B-B148-479088B903AE		Positive	3 Point Scale	3+	3 Point Scale		Positive	Other					31	2			189	101	0				233	224		Cytoxan		70-79%	52112990-902D-408B-AC23-EF5DD5183241
TCGA-D8-A73U-01A					88	Left Upper Outer Quadrant		Sentinel lymph node biopsy plus axillary dissection		338.45.0	Nationwide Children's Hospital	TCGA-D8-A73U-D57872	96016F6D-6A93-4CA4-8261-A995B5304A9D	TCGA-D8-A73U-F57871	66FB6CC5-35C7-47CF-9FB4-63E3DB488520				Positive					Positive	Simple Mastectomy				NO	31	28				75	0							tamoxifen		70-79%	74544305-A5D1-4C60-B5A5-93200D35A341
TCGA-HN-A2NL-01A					56	Left Upper Outer Quadrant		Sentinel node biopsy alone		177.73.0	Nationwide Children's Hospital	TCGA-HN-A2NL-D60151	D9161F5E-D3C5-4B6F-8267-C280BAEBD2D4	TCGA-HN-A2NL-F60149	0CBA7FE6-A784-4125-BBE8-43108D8E03E2				Negative					Negative	Simple Mastectomy				YES	31	30				59	0							Doxorubicin			507FFA16-C8D2-405E-A0B6-67BEBABECE8A
TCGA-D8-A1JI-01A					54	Right Upper Outer Quadrant	Regional site	Axillary lymph node dissection alone		109.88.0	Nationwide Children's Hospital	TCGA-D8-A1JI-D65327	48CDB206-6F2C-4B85-AD7B-E40F9B481D47	TCGA-D8-A1JI-F20757	64833FD0-E1B5-4773-8638-1E41D0B9B4F0	TCGA-D8-A1JI-R20755	A5565D0D-C16A-4574-BE2A-7D4C24927E76		Positive					Positive	Modified Radical Mastectomy				NO	31	19			162	41	0				231	204		letrozolum	manual counting		41434A39-7B30-43C1-9D41-8630D1AA0452		Scheduled Follow-up Submission
TCGA-D8-A1Y1-01A					80	Left Upper Outer Quadrant		Axillary lymph node dissection alone		124.80.0	Nationwide Children's Hospital	TCGA-D8-A1Y1-D30085	5389E215-9B46-4ED9-A3F2-0392ACD376A5	TCGA-D8-A1Y1-F30084	B147E8C4-F15B-4D80-98D2-281316F91CE1				Positive					Positive	Modified Radical Mastectomy					31	2			302	58	0						NO	Tamoxifen	manual counting		372D1261-3FCA-4404-A749-40B7E84C6681		Scheduled Follow-up Submission
TCGA-D8-A1JU-01A					51	Left Upper Outer Quadrant		Sentinel node biopsy alone		109.88.0	Nationwide Children's Hospital	TCGA-D8-A1JU-D14044	E80A862C-2FA5-4802-9986-D1635BD35BD7	TCGA-D8-A1JU-F14045	B6D244EC-4151-4FF5-BDCF-0C2E6D22101A				Positive					Positive	Simple Mastectomy					31	18				87	0							Tamoxifen	manual counting		5A159959-929E-4D34-8689-9CF034D3D669		Scheduled Follow-up Submission
TCGA-D8-A1XO-01A					56	Left Lower Outer Quadrant	Primary Tumor Field	Axillary lymph node dissection alone		124.80.0	Nationwide Children's Hospital	TCGA-D8-A1XO-D72207	C1C52C47-5334-40A2-8898-0E1B7949D3A0	TCGA-D8-A1XO-F72206	A139305D-B569-4F6F-B37F-3134FD222946	TCGA-D8-A1XO-R29448	3E9D9BA8-2F52-4028-9284-AD01E58BF05E		Positive					Positive	Modified Radical Mastectomy				NO	31	29				93	0				119	93	NO	Tamoxifen	% IHC		9899D511-EA96-4D2A-9D1B-E1788B91EAE0		Scheduled Follow-up Submission
TCGA-3C-AALJ-01A					62	Right				379.34.0	Nationwide Children's Hospital	TCGA-3C-AALJ-D65378	B5D318C4-A505-475B-8ABC-DFEAA6B55593	TCGA-3C-AALJ-F68060	DF650B2E-12C2-468A-9F26-9A43CA378AF2				Positive					Positive	Modified Radical Mastectomy					31	13			511	151	0							Herceptin		90-99%	BAFB2DD3-BDB5-47D0-9BD2-5B990986C827
TCGA-BH-A0H6-01A					82	Right	Primary Tumor Field	No axillary staging		61.88.0	Nationwide Children's Hospital			TCGA-BH-A0H6-F4711	529564A6-8E4A-4B86-A79C-43009E0AB551	TCGA-BH-A0H6-R4707	30C78395-364D-4EDC-97D5-D54F53759758								Other			1	NO	31	16					0				97	64					F41ACAB1-13A4-4219-AF19-ACBB91517650
TCGA-E2-A15G-01A					76	Left Upper Outer Quadrant	Primary Tumor Field	Sentinel node biopsy alone		93.85.0	Nationwide Children's Hospital	TCGA-E2-A15G-D18903	BFCCD553-AC21-473B-BF95-489271D20DF1	TCGA-E2-A15G-F18901	119A323C-CF89-4041-ADD3-34AF96D44CEE	TCGA-E2-A15G-R18904	B33EE5B5-9277-45F1-8B30-E68D495EB0A8		Positive					Positive	Lumpectomy			1	NO	31	14				125	0				103	49	NO	Arimidex			167D27B7-39BC-430E-92FE-E484D584DABB		Scheduled Follow-up Submission
TCGA-D8-A1JN-01A					80	Left		Axillary lymph node dissection alone		109.88.0	Nationwide Children's Hospital	TCGA-D8-A1JN-D20746	2A418FF9-581C-4A9B-A4AB-B7B2C072C0EA	TCGA-D8-A1JN-F20745	8392D4C7-1892-4B0D-873C-049A73A24FF4				Positive					Positive	Modified Radical Mastectomy					31	15				63	0							anastrozolum	manual counting		2C0827E0-2A78-4652-B9CF-A5335D454104		Scheduled Follow-up Submission	HER2 amplification - negative
TCGA-A7-A3J0-01A					62	Right	Primary Tumor Field	Sentinel node biopsy alone		202.69.0	Nationwide Children's Hospital	TCGA-A7-A3J0-D35966	CDDA22AF-C26F-4051-9D80-3C195030DF0E	TCGA-A7-A3J0-F35965	B63F8878-C317-4D4A-8DA0-9A3B4ACEFEA4	TCGA-A7-A3J0-R29282	D07FF920-EBA1-42B4-BEDE-5A3B68777BCD		Positive					Positive	Lumpectomy			1	NO	31	12				72	0				63	57	NO	Anastrazole		90-99%	9538C8B4-0241-4434-9AC9-1B796172FE1D
TCGA-E9-A1N9-01A					58	Right Lower Outer Quadrant		Axillary lymph node dissection alone		120.76.0	Nationwide Children's Hospital	TCGA-E9-A1N9-D32898	378CC11C-A4AA-4803-B2C1-FD7C98CB5DAA	TCGA-E9-A1N9-F58373	07EB2A9C-A934-44A1-9FD2-C1580160C002				Negative					Positive					YES	31	8				119	0						NO	Tamoxifen			ECE8BFFB-2E9F-4A23-8170-4E4D9D5FA6B8		Scheduled Follow-up Submission
TCGA-E9-A1N9-11A					58	Right Lower Outer Quadrant		Axillary lymph node dissection alone		120.76.0	Nationwide Children's Hospital	TCGA-E9-A1N9-D32898	378CC11C-A4AA-4803-B2C1-FD7C98CB5DAA	TCGA-E9-A1N9-F58373	07EB2A9C-A934-44A1-9FD2-C1580160C002				Negative					Positive					YES	31	8				119	0						NO	Tamoxifen			ECE8BFFB-2E9F-4A23-8170-4E4D9D5FA6B8		Scheduled Follow-up Submission
TCGA-AO-A0J3-01A					67	Right	Regional site	Axillary lymph node dissection alone		56.90.0	Nationwide Children's Hospital	TCGA-AO-A0J3-D3051	2cba97f0-e44a-41cf-a5e6-96b637c1e453	TCGA-AO-A0J3-F15477	9F50DC63-8F33-4824-9078-B96B2188703D	TCGA-AO-A0J3-R3040	e7906fe2-660d-4ad4-ae6b-4b90b2eff3fa								Modified Radical Mastectomy			1	YES	31	22			191	149	0				263	223		METHOTREXATE			8BAB3C64-6E91-4678-A3FB-8BA77A76BA03		Scheduled Follow-up Submission
TCGA-E9-A1NF-01A			NO		60	Right Upper Outer Quadrant		Axillary lymph node dissection alone		120.76.0	Nationwide Children's Hospital	TCGA-E9-A1NF-D32924	A11CB0B1-B0B0-4E89-8C87-63A0F6638B32	TCGA-E9-A1NF-F39778	BF1ADCE9-14BB-4F7D-9B8D-DC8A5E3D824F				Positive					Positive					YES	31	1				280	0						NO	Tamoxifen			D9BA91E0-2A5E-40C2-AF2D-A07BEB0F97D5		Scheduled Follow-up Submission
TCGA-E9-A1NF-11A			NO		60	Right Upper Outer Quadrant		Axillary lymph node dissection alone		120.76.0	Nationwide Children's Hospital	TCGA-E9-A1NF-D32924	A11CB0B1-B0B0-4E89-8C87-63A0F6638B32	TCGA-E9-A1NF-F39778	BF1ADCE9-14BB-4F7D-9B8D-DC8A5E3D824F				Positive					Positive					YES	31	1				280	0						NO	Tamoxifen			D9BA91E0-2A5E-40C2-AF2D-A07BEB0F97D5		Scheduled Follow-up Submission
TCGA-A7-A0D9-01A					37	Left		Axillary lymph node dissection alone		61.88.0	Nationwide Children's Hospital	TCGA-A7-A0D9-D2916	57f1f05f-cb78-4305-9469-fe76399db912	TCGA-A7-A0D9-F39771	5570A0D0-8B4A-4607-B2AF-33D1B4A7EAF9										Simple Mastectomy				YES	31	1				157	0							Tamoxifen			45AB2FCF-68F6-4B38-8C44-A63CC169CAC9
TCGA-A7-A0D9-11A					37	Left		Axillary lymph node dissection alone		61.88.0	Nationwide Children's Hospital	TCGA-A7-A0D9-D2916	57f1f05f-cb78-4305-9469-fe76399db912	TCGA-A7-A0D9-F39771	5570A0D0-8B4A-4607-B2AF-33D1B4A7EAF9										Simple Mastectomy				YES	31	1				157	0							Tamoxifen			45AB2FCF-68F6-4B38-8C44-A63CC169CAC9
TCGA-A2-A04U-01A					47	Right		Sentinel node biopsy alone		85.85.0	Nationwide Children's Hospital	TCGA-A2-A04U-D6675	15e8f3ac-8410-402b-85c4-76caeb242226	TCGA-A2-A04U-F59317	022819FE-3C6C-4DDD-90FD-EBF7BD427042										Simple Mastectomy				YES	31	8			120	78	0							Cytoxan			ED1D5386-1792-46EC-9E8B-77AD1F4A7760
TCGA-D8-A146-01A					57	Right		Axillary lymph node dissection alone		85.85.0	Nationwide Children's Hospital			TCGA-D8-A146-F20750	33ECAE33-7777-48D5-BE7F-83396199B0FC				Positive					Positive	Modified Radical Mastectomy				NO	31	15					0						NO		manual counting		417CAFBA-DE78-4127-B514-E0E1BBA922A4		Scheduled Follow-up Submission
TCGA-A8-A07I-01A					69	Left Upper Outer Quadrant	Primary Tumor Field			47.97.0	Nationwide Children's Hospital	TCGA-A8-A07I-D37878	5488CE4C-EA04-476A-AA6B-6FE37646BC75	TCGA-A8-A07I-F40828	339036C6-8D30-466F-9CDD-9F7F28402C81	TCGA-A8-A07I-R38187	1BF7CBC3-B465-4421-911B-D37309EF031F		Positive					Negative	Other					31	2			334	183	0				304	245		Trastuzumab			27F47954-4FBA-4688-AE7E-3D4938971273
TCGA-BH-A0B9-01A					44	Right	Primary Tumor Field	Sentinel node biopsy alone		61.88.0	Nationwide Children's Hospital	TCGA-BH-A0B9-D15440	13B25C27-6D31-4812-9A44-FC50A5A1DFA8	TCGA-BH-A0B9-F15438	2C430BC9-3919-471B-B6F0-EE5346626686	TCGA-BH-A0B9-R15441	BB3B3DEB-1D17-48BB-B0BF-5491D69AAC51		Negative		0			Negative	Other			1	NO	31	4			111	48	0				180	132		CYCLOPHOSPHAMIDE			5B1B4418-B7BC-4D52-A17A-28471DE98A34		Scheduled Follow-up Submission
TCGA-BH-A1FU-01A					44	Right Upper Outer Quadrant				120.76.0	Nationwide Children's Hospital								Negative					Negative	Modified Radical Mastectomy					31	8					0										E0F7A9EC-4AEF-4AB1-BD2D-3DAC45E8B3AC
TCGA-BH-A1FU-11A					44	Right Upper Outer Quadrant				120.76.0	Nationwide Children's Hospital								Negative					Negative	Modified Radical Mastectomy					31	8					0										E0F7A9EC-4AEF-4AB1-BD2D-3DAC45E8B3AC
TCGA-A8-A085-01A					44	Left				47.97.0	Nationwide Children's Hospital	TCGA-A8-A085-D37772	DA0D6313-0886-4A80-817A-6FDF72104A27	TCGA-A8-A085-F40839	9130CB27-2E3C-4E79-B685-4C2367ADFD41				Positive					Positive	Other		n/a			31	2				394	0							Tamoxifen			B34040C9-7652-4CFE-93D6-2F993A87DC10
TCGA-A2-A04W-01A					50	Right Upper Outer Quadrant		Axillary lymph node dissection alone		85.85.0	Nationwide Children's Hospital	TCGA-A2-A04W-D6691	ed0088f6-01ce-4f8a-99e1-998641ad9eac	TCGA-A2-A04W-F59320	B47778FE-E5A6-4E67-86BC-1A39A7C39BFE										Modified Radical Mastectomy				NO	31	8			352	198	0							Herceptin			2B1E7BFF-B0E0-4FC3-AE10-916B4AFA01A6
TCGA-B6-A40C-01A					51	Left Upper Outer Quadrant	Primary Tumor Field	Sentinel node biopsy alone		239.55.0	Nationwide Children's Hospital	TCGA-B6-A40C-D41043	93C4C94A-4713-49E3-85A0-2D02AF47B8E8	TCGA-B6-A40C-F59660	3C1BA7E3-2F4E-4FE3-B558-91284B51CC4E	TCGA-B6-A40C-R41044	2765DB95-8665-4445-B94B-390902724055		Positive	4 Point Scale	3+	4 Point Scale		Positive	Simple Mastectomy				YES	31	3			170	128	0				254	218		Paclitaxel		50-59%	B58D4B00-0A96-4E2E-BDB1-C25C496B496B
TCGA-EW-A2FW-01A					52	Right Upper Outer Quadrant	Primary Tumor Field	Sentinel node biopsy alone		155.73.0	Nationwide Children's Hospital	TCGA-EW-A2FW-D32344	C01E02E6-1EE4-42C5-A55A-2C49B956BE8F	TCGA-EW-A2FW-F42062	15C65211-A67D-4438-BA46-7DE122DB17FB	TCGA-EW-A2FW-R32337	8048DA7B-76F8-45CF-8B2D-46D6509CF44F		Positive	3 Point Scale	3+	3 Point Scale		Positive	Lumpectomy			1	YES	31	10				0	0				329	279	NO	Exemestane		90-99%	A0544223-7E61-44F4-8765-562617A3594C		Scheduled Follow-up Submission
TCGA-E9-A1QZ-01A					61	Left Lower Inner Quadrant		Axillary lymph node dissection alone		142.78.0	Nationwide Children's Hospital			TCGA-E9-A1QZ-F66270	E97CFB3D-31E0-4AED-82C6-C775CF5282FE															31	7					0						NO				EFD89E90-3D44-4A9C-95D4-BC36879C5F93		Scheduled Follow-up Submission
TCGA-B6-A0I1-01A	NO	NO			73	Left Upper Outer Quadrant		Axillary lymph node dissection alone		216.63.0	Nationwide Children's Hospital			TCGA-B6-A0I1-F38909	31CBA550-5941-49DB-B716-73F9F87BA3E9				Negative					Negative	Modified Radical Mastectomy				NO	31	3					0		1120	1120					image cytometry		E673B7BC-9C87-455F-997B-42AF71AEAAEF
TCGA-AN-A0XS-01A					63	Left Upper Outer Quadrant				74.87.0	Nationwide Children's Hospital			TCGA-AN-A0XS-F68959	81BF97A6-7C9E-480B-A317-746E9A86CDB8				Negative					Positive						31	23					0						NO				F5944131-CE71-41E9-AA03-9897276963D8
TCGA-B6-A0IO-01A					66	Left		Axillary lymph node dissection alone		56.90.0	Nationwide Children's Hospital			TCGA-B6-A0IO-F71503	E3BA117D-59D6-449B-9AC8-88BECDB2682A				Positive					Indeterminate	Modified Radical Mastectomy				NO	31	26					0								Image Analysis		E48E0ABE-BE6F-428E-A1F4-F1247E70DFAF		Scheduled Follow-up Submission
TCGA-AC-A5XU-01A					74	Left Upper Outer Quadrant	Primary Tumor Field	Sentinel node biopsy alone		296.54.0	Nationwide Children's Hospital	TCGA-AC-A5XU-D60183	C044891E-2E52-4DC9-BA16-4CA6D345F0D6	TCGA-AC-A5XU-F60181	8F4EF134-A173-4B96-BCBC-EE7249039A4E	TCGA-AC-A5XU-R60182	1C1F9080-ED1B-4E9E-8B1F-3B8BA8E5F3FC		Positive					Positive	Lumpectomy					31	31				235	0				199	156		Letrozole		90-99%	5A0E295E-DADD-4D35-BA3F-D0EAAA9E66EF
TCGA-A8-A06Q-01A					63	Left Upper Outer Quadrant				56.90.0	Nationwide Children's Hospital								Positive					Positive	Other					31	27					0										91090754-6556-4EEA-BA22-E4C23EEC4D6E
TCGA-E2-A14Y-01A					35	Right		Sentinel node biopsy alone		93.85.0	Nationwide Children's Hospital	TCGA-E2-A14Y-D18500	4D262684-171D-4544-A44F-60BFAC00AEAA	TCGA-E2-A14Y-F70401	69DD5AC7-10EB-49C5-B9C9-CCE7B1F28459				Positive					Positive	Simple Mastectomy				NO	31	17			384	44	0						NO	Trastuzumab			0D03B124-181F-45B4-8FA8-71815E1840A4		Scheduled Follow-up Submission
TCGA-E2-A14Y-11A					35	Right		Sentinel node biopsy alone		93.85.0	Nationwide Children's Hospital	TCGA-E2-A14Y-D18500	4D262684-171D-4544-A44F-60BFAC00AEAA	TCGA-E2-A14Y-F70401	69DD5AC7-10EB-49C5-B9C9-CCE7B1F28459				Positive					Positive	Simple Mastectomy				NO	31	17			384	44	0						NO	Trastuzumab			0D03B124-181F-45B4-8FA8-71815E1840A4		Scheduled Follow-up Submission
TCGA-E2-A1BD-01A					53	Right Upper Outer Quadrant	Primary Tumor Field	Sentinel node biopsy alone		96.78.0	Nationwide Children's Hospital	TCGA-E2-A1BD-D19445	2534A6C5-8DD5-454D-8887-6098E2B7CBB1	TCGA-E2-A1BD-F70021	C93AB29A-00FC-49AC-89DC-AC44ED0A1F59	TCGA-E2-A1BD-R19442	9FC62023-6140-4514-B9DE-74BCC48157A0		Positive					Positive	Lumpectomy			1	NO	31	9				170	0				108	55	NO	Arimidex	Allred score 5+3 = 8		7AAC3371-7003-486F-B9DB-49042301D500		Scheduled Follow-up Submission
TCGA-AQ-A04H-01B					61	Left Lower Inner Quadrant	Primary Tumor Field	Axillary lymph node dissection alone		80.83.0	Nationwide Children's Hospital	TCGA-AQ-A04H-D40873	A6C7F4F8-93C6-435A-A59A-88ED37540B88	TCGA-AQ-A04H-F35322	E5147793-FAA6-44C5-BE7E-D11656CD8119	TCGA-AQ-A04H-R4982	d113adb3-5e01-4acc-b1c5-f15e6762bb51								Modified Radical Mastectomy			1	NO	31	24			133	29	0				166	138		Herceptin			1EAC1F3A-6580-4F5A-863F-DB39F8F75DAA
TCGA-AN-A0FJ-01A					59	Left Upper Outer Quadrant		Axillary lymph node dissection alone		47.97.0	Nationwide Children's Hospital			TCGA-AN-A0FJ-F68950	6A061E72-8985-4C17-AB5A-BAE6F2AAEB10				Positive		0			Negative	Modified Radical Mastectomy				NO	31	23					0								dextran coated charcoal	10-19%	E44865D6-C69E-4EA0-8E8D-498E477F8DEF
TCGA-D8-A1X6-01A					80	Left Upper Outer Quadrant		Axillary lymph node dissection alone		124.80.0	Nationwide Children's Hospital	TCGA-D8-A1X6-D29982	4AC37B69-6DC4-4880-9775-F6A571022CB5	TCGA-D8-A1X6-F29980	98F6BFFF-5DE5-4EBE-A1E8-B4C971C5155C				Positive					Positive	Modified Radical Mastectomy					31	31				65	0						NO	tamoxifen	manual counting		06E722E3-05B1-479E-9D93-1FF9BB03A6AF		Scheduled Follow-up Submission
TCGA-A2-A0EY-01A					62	Right Upper Outer Quadrant	Regional site	Sentinel lymph node biopsy plus axillary dissection		56.90.0	Nationwide Children's Hospital	TCGA-A2-A0EY-D1892	c5f2e97a-c397-4193-a55d-c10d91996a6b	TCGA-A2-A0EY-F13716	B1FF94BC-9F0B-4998-9EF9-4163BAA4F01A	TCGA-A2-A0EY-R70742	EBA1B640-7E29-4BCF-8368-04A1FBFF1329		Positive					Negative	Lumpectomy				YES	31	10				183	0				316	279		Herceptin		60-69%	65AD5AB0-E7AB-4968-8597-C4C1F1E7BCCE		Scheduled Follow-up Submission
TCGA-A8-A09K-01A					68	Left Lower Outer Quadrant				47.97.0	Nationwide Children's Hospital			TCGA-A8-A09K-F40332	094D8DCB-8317-4A5C-8A40-A134ADD8DBDE				Positive					Positive	Other					31	17					0										F432653B-D275-49D7-8869-C67E64C50D06
TCGA-E9-A1RF-01A					68	Left Upper Outer Quadrant	Regional site	Axillary lymph node dissection alone		136.76.0	Nationwide Children's Hospital	TCGA-E9-A1RF-D30634	59D29C9B-773E-49D8-B79E-18BCF84061DC	TCGA-E9-A1RF-F48703	35166AFC-AAC8-4F95-931D-11660E40DDCF	TCGA-E9-A1RF-R30638	10729565-ADC4-4C6F-891E-1606E11ABA81								Modified Radical Mastectomy			1	NO	31	19			194	54	0				144	118	NO	Cyclophosphamide			E1AE2FC8-4EDC-4786-B64E-18AF0DC6B2EC		Scheduled Follow-up Submission
TCGA-E9-A1RF-11A					68	Left Upper Outer Quadrant	Regional site	Axillary lymph node dissection alone		136.76.0	Nationwide Children's Hospital	TCGA-E9-A1RF-D30634	59D29C9B-773E-49D8-B79E-18BCF84061DC	TCGA-E9-A1RF-F48703	35166AFC-AAC8-4F95-931D-11660E40DDCF	TCGA-E9-A1RF-R30638	10729565-ADC4-4C6F-891E-1606E11ABA81								Modified Radical Mastectomy			1	NO	31	19			194	54	0				144	118	NO	Cyclophosphamide			E1AE2FC8-4EDC-4786-B64E-18AF0DC6B2EC		Scheduled Follow-up Submission
TCGA-A8-A08P-01A					70	Right	Primary Tumor Field			47.97.0	Nationwide Children's Hospital	TCGA-A8-A08P-D37778	05503837-81F2-4017-88A9-C22758556147	TCGA-A8-A08P-F40561	5AC6BE92-4C93-419D-A6B8-65C8B218B5D4	TCGA-A8-A08P-R38160	CF63E708-3ED7-4F91-9929-41FD1CF62191		Positive					Positive	Other		n/a			31	24			578	213	0				244	182		Trastuzumab			0306FDAB-46F8-47F7-B1D9-F5D17FB8950C
TCGA-E9-A229-01A					37	Right Lower Inner Quadrant	Regional site	Axillary lymph node dissection alone		136.76.0	Nationwide Children's Hospital	TCGA-E9-A229-D29802	5D1A648D-B766-45C5-A426-F17BEA87EFD8	TCGA-E9-A229-F65803	F2689D1C-F153-4432-93F5-54D768688BB2	TCGA-E9-A229-R29804	96F0A1DE-9AD4-4E84-B783-31C0475F7C9A													31	30			182	24	0				235	207	NO	Doxorubicin			72310E3D-4740-430E-A973-2533B5CE9F97		Scheduled Follow-up Submission
TCGA-BH-A2L8-01A					45	Right Upper Outer Quadrant		Sentinel node biopsy alone		177.73.0	Nationwide Children's Hospital	TCGA-BH-A2L8-D43167	D1B01084-E040-4E41-ACAC-3A7D4A79E959	TCGA-BH-A2L8-F39616	C86ACD7B-AFEA-462D-BDA8-0A6980460D1E				Positive					Positive	Other				NO	31	28			197	136	0						NO	Cytoxan		70-79%	B145AA7E-7708-4843-8DB2-FCE6D225B735
TCGA-A7-A4SD-01A					52	Right		Sentinel node biopsy alone		271.56.0	Nationwide Children's Hospital	TCGA-A7-A4SD-D40420	642ABB42-0832-4A3A-9FB0-AE825D90EEC6	TCGA-A7-A4SD-F52732	DDAD5580-4821-46F0-9F96-9C8F4615A7DF				Negative					Negative	Simple Mastectomy				YES	31	5			134	64	0							Cytoxan			16013E0A-AB57-4A38-BFC1-D91D1188D686	5
TCGA-A7-A4SD-11A					52	Right		Sentinel node biopsy alone		271.56.0	Nationwide Children's Hospital	TCGA-A7-A4SD-D40420	642ABB42-0832-4A3A-9FB0-AE825D90EEC6	TCGA-A7-A4SD-F52732	DDAD5580-4821-46F0-9F96-9C8F4615A7DF				Negative					Negative	Simple Mastectomy				YES	31	5			134	64	0							Cytoxan			16013E0A-AB57-4A38-BFC1-D91D1188D686	5
TCGA-A8-A08I-01A					53	Right Upper Inner Quadrant	Primary Tumor Field			47.97.0	Nationwide Children's Hospital	TCGA-A8-A08I-D37832	8817E13F-ED74-42EB-9E2A-B873D79488B6	TCGA-A8-A08I-F40845	98D30323-480E-40B0-825C-3EA0C137401C	TCGA-A8-A08I-R38173	0322ED7F-C303-4755-B8C3-4FED19B89D49		Positive					Positive	Other		n/a			31	2				212	0				212	184		Letrozole			0D31C79C-D97A-40C6-B755-08EEE87439CF
TCGA-A7-A0CG-01A					78	Right	Primary Tumor Field	Sentinel lymph node biopsy plus axillary dissection		47.97.0	Nationwide Children's Hospital			TCGA-A7-A0CG-F39202	1A0EDC84-2E6A-4F64-80E3-F86E7F597E1A	TCGA-A7-A0CG-R3053	8a3d7282-2622-42f4-a841-7621c3e442c7								Lumpectomy			1	YES	31	15					0				176	146					93C8BD06-1814-47EB-80EB-FBAF97E499E2
TCGA-BH-A0HA-01A					31	Right				96.78.0	Nationwide Children's Hospital			TCGA-BH-A0HA-F43320	3BFD818A-CF1F-4459-9B36-7CAD9D475D5B				Positive					Positive	Other					31	17					0						NO				470C24D9-D6CC-4133-A52B-72D125357B85		Scheduled Follow-up Submission
TCGA-BH-A0HA-11A					31	Right				96.78.0	Nationwide Children's Hospital			TCGA-BH-A0HA-F43320	3BFD818A-CF1F-4459-9B36-7CAD9D475D5B				Positive					Positive	Other					31	17					0						NO				470C24D9-D6CC-4133-A52B-72D125357B85		Scheduled Follow-up Submission
TCGA-D8-A1XQ-01A					69	Right Upper Outer Quadrant		Axillary lymph node dissection alone		124.80.0	Nationwide Children's Hospital			TCGA-D8-A1XQ-F29449	E3365AFC-09F9-4524-A456-5208C249283D				Negative					Negative	Modified Radical Mastectomy				NO	31	26					0						NO		% IHC		E9C3CBDB-83CE-4661-AE30-A01E625A8BB5		Scheduled Follow-up Submission
TCGA-B6-A0RN-01A					60	Right		Axillary lymph node dissection alone		72.90.0	Nationwide Children's Hospital			TCGA-B6-A0RN-F71514	268E69D6-E783-4413-9FC9-6D584E476CF4				Negative					Negative	Modified Radical Mastectomy				NO	31	26					0								Image Analysis		A0297323-96FC-4C08-9F4A-24F476135084		Scheduled Follow-up Submission
TCGA-BH-A1FC-01A					78	Right Upper Outer Quadrant				109.88.0	Nationwide Children's Hospital								Negative					Negative	Other					31	8					0										86056BF2-5025-4C59-8BE8-ECC37C82A371
TCGA-BH-A1FC-11A					78	Right Upper Outer Quadrant				109.88.0	Nationwide Children's Hospital								Negative					Negative	Other					31	8					0										86056BF2-5025-4C59-8BE8-ECC37C82A371
TCGA-EW-A1IW-01A					80	Right Lower Outer Quadrant		Sentinel lymph node biopsy plus axillary dissection		109.88.0	Nationwide Children's Hospital	TCGA-EW-A1IW-D21178	6E6AFF49-706F-44B0-8ED2-F4AB626A5491	TCGA-EW-A1IW-F21380	F2B8499E-0A1A-45DA-86EA-531D38617555				Positive	3 Point Scale	3+	3 Point Scale		Positive	Other				YES	31	6				71	0						NO	Aromasin		90-99%	FF1F8B29-44ED-4B72-B3CD-8D511A3C6697		Scheduled Follow-up Submission
TCGA-A2-A0ER-01A					63	Right Lower Inner Quadrant	Primary Tumor Field	Sentinel lymph node biopsy plus axillary dissection		56.90.0	Nationwide Children's Hospital	TCGA-A2-A0ER-D1982	72844d5d-8e7f-4b64-80a5-ee6e676e0b32	TCGA-A2-A0ER-F13719	1D5FC55A-1B4C-4319-89BB-1B2DF2C3FE55	TCGA-A2-A0ER-R1983	a18a9176-c998-41d5-b7b2-07d966053c74	Negative	Positive				Lumpectomy	Positive	Lumpectomy			1	YES	31	13			615	327	0				246	200		E-75		90-99%	1F5E7E04-B829-4701-9692-FA9EF4F91825		Scheduled Follow-up Submission
TCGA-A2-A0T3-01A					37	Right Upper Outer Quadrant	Primary Tumor Field	Sentinel lymph node biopsy plus axillary dissection		85.85.0	Nationwide Children's Hospital	TCGA-A2-A0T3-D9215	b41bdca7-b0bf-4308-b906-1dcc9bf77b23	TCGA-A2-A0T3-F59384	7449E8A7-2B95-489D-BA42-16889AC8E023	TCGA-A2-A0T3-R9219	f00904bf-c888-403a-a5d4-2d76fcbc5378	Negative	Positive	3 Point Scale	3+	3 Point Scale	Other	Positive	Lumpectomy	Margin resection		1	YES	31	12			177	70	0				248	203	NO	Adriamycin		90-99%	E7CAEB1C-F3A5-4583-8437-3812F575116D	2.3	Scheduled Follow-up Submission
TCGA-E2-A155-01A					58	Left Lower Inner Quadrant		Axillary lymph node dissection alone		93.85.0	Nationwide Children's Hospital	TCGA-E2-A155-D19105	39BFC0D7-45BC-4640-BA13-4397A0A9CE06	TCGA-E2-A155-F18942	35A9196F-3E2C-44FE-822F-32FB066756A0				Positive					Negative	Modified Radical Mastectomy				NO	31	8					0						NO	Taxol			6BA3B09A-51FC-4538-B4F5-9A8DBAF09008		Scheduled Follow-up Submission
TCGA-BH-A0H9-01A					69	Right	Primary Tumor Field	Sentinel node biopsy alone		61.88.0	Nationwide Children's Hospital	TCGA-BH-A0H9-D4699	DA3E47E4-D137-485D-BB51-268013C132C2	TCGA-BH-A0H9-F4703	F47167AF-0722-4448-88DC-80918DF82E28	TCGA-BH-A0H9-R4701	2EBAC797-F05A-4DEA-A427-709B2D7D5B39								Other			1	NO	31	16				101	0				263	225		Arimidex			BEA432A7-9B59-42B8-B011-6E1DAC4C0F39
TCGA-BH-A0H9-11A					69	Right	Primary Tumor Field	Sentinel node biopsy alone		61.88.0	Nationwide Children's Hospital	TCGA-BH-A0H9-D4699	DA3E47E4-D137-485D-BB51-268013C132C2	TCGA-BH-A0H9-F4703	F47167AF-0722-4448-88DC-80918DF82E28	TCGA-BH-A0H9-R4701	2EBAC797-F05A-4DEA-A427-709B2D7D5B39								Other			1	NO	31	16				101	0				263	225		Arimidex			BEA432A7-9B59-42B8-B011-6E1DAC4C0F39
TCGA-BH-A0B6-01A					47	Left Upper Outer Quadrant	Primary Tumor Field			185.69.0	Nationwide Children's Hospital			TCGA-BH-A0B6-F61943	DBFF7E03-09CD-4687-B14C-277D6E8073C5	TCGA-BH-A0B6-R61948	8CC21685-71B7-44DA-8672-63853A6F8706		Positive					Positive	Other					31	10					0				143	94	NO				DD28ABB4-FCCA-482E-A83B-EB98ECDA037B
TCGA-BH-A0DP-01A					60	Right	Primary Tumor Field	Sentinel node biopsy alone		61.88.0	Nationwide Children's Hospital	TCGA-BH-A0DP-D4536	09705E2D-CC53-4DA2-A6E5-73E70334B727	TCGA-BH-A0DP-F4538	76E54C1C-F786-46BA-8C0F-D377A4642890	TCGA-BH-A0DP-R4537	61E05A64-548D-49A2-82C0-BD15A10024CD								Simple Mastectomy			1	NO	31	16				97	0				180	136		ARIMIDEX			550FAE76-71F3-4DD1-8F90-8A5D5C847C53
TCGA-BH-A0DP-11A					60	Right	Primary Tumor Field	Sentinel node biopsy alone		61.88.0	Nationwide Children's Hospital	TCGA-BH-A0DP-D4536	09705E2D-CC53-4DA2-A6E5-73E70334B727	TCGA-BH-A0DP-F4538	76E54C1C-F786-46BA-8C0F-D377A4642890	TCGA-BH-A0DP-R4537	61E05A64-548D-49A2-82C0-BD15A10024CD								Simple Mastectomy			1	NO	31	16				97	0				180	136		ARIMIDEX			550FAE76-71F3-4DD1-8F90-8A5D5C847C53
TCGA-BH-A0AV-01A					52	Left Upper Inner Quadrant	Primary Tumor Field			85.85.0	Nationwide Children's Hospital	TCGA-BH-A0AV-D59176	BA9B227E-1B4A-469B-BCC4-E008C2CA2DAA	TCGA-BH-A0AV-F59174	F2F9895E-1F5D-4A27-9394-24906331E464	TCGA-BH-A0AV-R59177	1E9BDB6B-495D-4881-8264-4717B2630D9B		Negative					Negative	Other					31	2			259	146	0				308	259	NO	Cytoxan			EBE15F26-D5FD-499A-B286-C92729F55A94
TCGA-OL-A6VR-01A					48	Right		Sentinel lymph node biopsy plus axillary dissection		338.45.0	Nationwide Children's Hospital			TCGA-OL-A6VR-F59367	FEC2BC26-90CA-4ACF-87BF-4F743CBDB5D4				Positive					Positive	Simple Mastectomy					31	10					0									30-39%	D82508AA-8408-4A33-9755-7BE21361FDF2
TCGA-E2-A14U-01A					74	Right Upper Outer Quadrant		Other (specify)	Sentinel lymph node dissection	227.60.0	Nationwide Children's Hospital	TCGA-E2-A14U-D33623	0B0A2B1B-77FF-4EEF-B070-7C3DAB61221D	TCGA-E2-A14U-F33622	573201B2-5807-4344-A976-9996B93EAE55				Positive					Positive	Lumpectomy				NO	31	11				129	0						NO	Arimidex	Allred score 5+3 = 8		C1CCE68E-B45F-4D9F-A80E-96C61D5F1E50		Scheduled Follow-up Submission
TCGA-LL-A9Q3-01A					69	Left Upper Outer Quadrant	Primary Tumor Field	Axillary lymph node dissection alone		379.34.0	Nationwide Children's Hospital	TCGA-LL-A9Q3-D67101	B225CCB0-5441-4D39-98BE-00AAA257CE40	TCGA-LL-A9Q3-F67103	21E69907-81F4-4C83-ACCC-E79FFE88B38C	TCGA-LL-A9Q3-R67102	F10086C3-8DB8-4FE5-ACD6-E85CC15E25F9		Positive	3 Point Scale	2+	3 Point Scale		Positive	Modified Radical Mastectomy				YES	31	30				273	0				290	251		ARIMIDEX		90-99%	54629F45-36BC-4709-AA20-B8DB632847C7
TCGA-AO-A129-01A					29	Left	Regional site	Axillary lymph node dissection alone		80.83.0	Nationwide Children's Hospital	TCGA-AO-A129-D5949	7a4726f6-1df6-4d6c-af20-b21164882894	TCGA-AO-A129-F19415	C40939D7-1F54-4652-BEEF-94586A5F9051	TCGA-AO-A129-R5883	0417042c-5493-4b8d-b969-7077215b602d								Modified Radical Mastectomy			1	NO	31	12			162	67	0				246	216		Doxorubicin			C263E86F-9134-4B38-8A40-A4DBBD9B1F0E		Scheduled Follow-up Submission
TCGA-AR-A5QN-01A					68	Left	Primary Tumor Field	Axillary lymph node dissection alone		296.54.0	Nationwide Children's Hospital	TCGA-AR-A5QN-D43912	9033B921-AB35-4CBF-9362-256C58629822	TCGA-AR-A5QN-F43862	45449D22-C8F2-4781-B1E8-8413EBCC5A80	TCGA-AR-A5QN-R43901	12842F15-A078-4D68-BFED-ED9D6FA40DD3		Positive					Positive	Modified Radical Mastectomy					31	10				388	0				173	136		Exemestane			8D0A7982-988F-44FF-9FB3-960B765D478A
TCGA-D8-A1XZ-01A					81	Right Lower Inner Quadrant	Primary Tumor Field	Axillary lymph node dissection alone		124.80.0	Nationwide Children's Hospital	TCGA-D8-A1XZ-D30078	3B8B3BD1-028D-4001-B58C-D0CE9C68CF27	TCGA-D8-A1XZ-F30077	5898E4E8-0E20-482D-BF42-11B375146742	TCGA-D8-A1XZ-R30079	C8844127-DA9B-42AF-8D57-3B1CE257E1A5		Positive					Negative	Modified Radical Mastectomy					31	2				94	0				93	69	NO	tamoxiphene+anastrozolum	manual counting		9D83363B-4C76-458C-A1EC-0EEFC0C6C91C		Scheduled Follow-up Submission
TCGA-AC-A8OQ-01A					72	Right Upper Outer Quadrant		Sentinel node biopsy alone		379.34.0	Nationwide Children's Hospital								Negative					Negative	Lumpectomy				NO	31	26					0										C7501578-88B5-4834-B09D-1752487300A9
TCGA-PL-A8LX-01A					35	Left Upper Outer Quadrant				379.34.0	Nationwide Children's Hospital			TCGA-PL-A8LX-F64852	0E44B46C-87DA-4980-8CD3-F0E13C3681B0															31	17					0										FDC107B7-9A15-4396-9A24-E2B5F9D75C40
TCGA-E2-A570-01A					47	Right Lower Inner Quadrant		Sentinel node biopsy alone		305.50.0	Nationwide Children's Hospital	TCGA-E2-A570-D44535	569DEEF9-63F5-49E8-8D2F-AC6BA220410F	TCGA-E2-A570-F61335	D033E907-A771-48E7-AC23-E1DC385C5CD1				Positive					Positive	Simple Mastectomy				NO	31	27				252	0							Anastrozole	Allred 7 = 5+2		EA679001-AFFF-41B4-9E4C-DCB03F49253C	2.0
TCGA-AR-A24P-01A					47	Left Upper Outer Quadrant		Sentinel lymph node biopsy plus axillary dissection		142.78.0	Nationwide Children's Hospital			TCGA-AR-A24P-F31403	FD010A17-3FAC-4DBB-BD62-A3A5C0361049				Positive					Positive	Other				YES	31	2					0									10-19%	4AFA0D70-566B-444A-B446-57D8F9707702		Scheduled Follow-up Submission
TCGA-B6-A0I2-01A					45	Left		Axillary lymph node dissection alone		56.90.0	Nationwide Children's Hospital			TCGA-B6-A0I2-F12630	57FE226B-27F7-407B-81E0-EB90A79DC9DB														NO	31	2					0										8C1BE96D-E11C-4F5D-ACAD-96A2D0167305		Scheduled Follow-up Submission
TCGA-D8-A27E-01A					66	Left Upper Inner Quadrant	Primary Tumor Field	Sentinel node biopsy alone		147.75.0	Nationwide Children's Hospital	TCGA-D8-A27E-D30113	3D420476-7EB9-4632-B3F8-3BB85B979A0D	TCGA-D8-A27E-F30112	AB1218C8-CF64-40A3-80A9-654B1A5A0BD3	TCGA-D8-A27E-R30114	8DF3C173-15EF-461F-BF7E-D5D973330EF5		Positive					Positive					NO	31	2				125	0				95	90	NO	tamoxiphen+anastrazolum	manual counting		A6C3F784-24E8-41D9-9609-1E4389A059B0		Scheduled Follow-up Submission
TCGA-AN-A03Y-01A					66	Left Upper Outer Quadrant		No axillary staging		47.97.0	Nationwide Children's Hospital			TCGA-AN-A03Y-F68977	53FFC456-27B7-427B-9E7B-E89905DC80E9				Positive					Positive	Modified Radical Mastectomy				NO	31	24					0										A928F9B2-16D5-42C3-834D-A6251916B4F8
TCGA-E2-A1L6-01A					44	Left Upper Outer Quadrant		Sentinel lymph node biopsy plus axillary dissection		109.88.0	Nationwide Children's Hospital	TCGA-E2-A1L6-D20574	C2F3080E-04F4-408F-945A-184A8E8F53AD	TCGA-E2-A1L6-F20570	78110A92-E50F-46A7-A227-ABEDC2F39EDC				Positive					Positive	Simple Mastectomy				NO	31	10			1120	49	0						NO	Clodronate	allred score 5 + 3 = 8		0BDA6194-DFC0-487F-8A1B-2C3BC596BC7A		Scheduled Follow-up Submission
TCGA-A8-A0A1-01A					84	Right				47.97.0	Nationwide Children's Hospital	TCGA-A8-A0A1-D37902	A7EE46AB-50EC-4F0E-9E46-F0C31EC14204						Positive					Positive	Other					31	6				31	0							Tamoxifen			A9D9B131-3901-421B-8E18-A0901E1AB1CF
TCGA-A2-A04Q-01A					48	Right		Other (specify)	SLN AND NON-SLN BX	56.90.0	Nationwide Children's Hospital	TCGA-A2-A04Q-D2764	9f6d826b-b6b9-4f14-8640-7e859b8c7f95	TCGA-A2-A04Q-F59314	8C018342-8251-45D4-B7B0-807B5F7BC07B										Simple Mastectomy				YES	31	8			85	43	0							CYTOXAN			08E22EAD-57D7-4266-BE84-AF013179747F
TCGA-LL-A5YL-01A					64	Right Upper Inner Quadrant	Regional site	Sentinel lymph node biopsy plus axillary dissection		305.50.0	Nationwide Children's Hospital	TCGA-LL-A5YL-D59653	8E7139E6-B6EF-403D-ABDE-AF79BD55D833	TCGA-LL-A5YL-F59650	0FBEAAC5-77A9-4E92-9B8F-E11AA2F05535	TCGA-LL-A5YL-R59652	041DB4FA-27B4-4F06-B997-A6B2D1B2CC15		Positive	3 Point Scale		3 Point Scale		Negative	Simple Mastectomy					31	19				341	0				315	273		ARIMIDEX		90-99%	6C3EC039-328B-4CD5-9039-3E8630E1EF16	2.9
TCGA-BH-A0BD-01A					47	Left	Primary Tumor Field	Sentinel lymph node biopsy plus axillary dissection		56.90.0	Nationwide Children's Hospital	TCGA-BH-A0BD-D15425	A100360C-297C-429F-B00F-42AC189E7E5B	TCGA-BH-A0BD-F15423	E292A040-7F71-48F6-83E4-1D0BF934EF28	TCGA-BH-A0BD-R15427	BD660DD1-5058-42E5-A3E2-C3B039B665B4		Positive					Positive	Other			1	NO	31	4			166	61	0				247	196		Doxorubicin	H-Score-190		96EE15C4-DF47-4A68-926C-B90782D97AA2		Scheduled Follow-up Submission
TCGA-B6-A0RQ-01A					68	Right		Axillary lymph node dissection alone		85.85.0	Nationwide Children's Hospital			TCGA-B6-A0RQ-F13787	A826EFB1-9FF7-48D1-9C56-36E5A2747CA7			Negative	Positive					Positive	Other				NO	31	12					0								Image Analysis		8800D874-84FB-48EB-A6BF-11EBFF0C3924		Scheduled Follow-up Submission
TCGA-AQ-A04L-01B					48	Right		Sentinel node biopsy alone		80.83.0	Nationwide Children's Hospital	TCGA-AQ-A04L-D5902	d5c327db-f7d5-4cd6-b90d-ea1ac1999f6a	TCGA-AQ-A04L-F35324	34C3837D-DC46-481C-B853-6E2BD80C7466										Modified Radical Mastectomy				NO	31	24			1957	141	0							Tamoxifen			F3A6E8A5-35E8-463C-903D-F77BEE2C3FA7
TCGA-OL-A5RU-01A					63	Left Upper Outer Quadrant	Regional site	Sentinel node biopsy alone		296.54.0	Nationwide Children's Hospital	TCGA-OL-A5RU-D65253	6A5D8B38-7542-47E7-BC90-14735FEA1214	TCGA-OL-A5RU-F56569	117AF3FA-5687-4518-936E-40CD09BB40E5	TCGA-OL-A5RU-R65251	22B829AF-B769-4C42-B835-9B5461DCF6FC		Positive					Positive	Modified Radical Mastectomy					31	14			134	71	0				197	160		docetaxel		90-99%	EC88297E-0B94-4E51-A349-736699BBF963
TCGA-E2-A1LG-01A					50	Left Upper Outer Quadrant		Axillary lymph node dissection alone		124.80.0	Nationwide Children's Hospital	TCGA-E2-A1LG-D20672	166CD47F-16CF-45F5-8581-239149E00AD1	TCGA-E2-A1LG-F70390	F8B62F0A-6F64-498B-826E-51156ED65F81				Negative					Negative	Modified Radical Mastectomy				NO	31	16			203	126	0						NO	Paclitaxel	Allred score 0+0 = 0		53DEAB3C-8919-49EB-8A3A-694B4D9214F2		Scheduled Follow-up Submission
TCGA-E2-A1LG-11A					50	Left Upper Outer Quadrant		Axillary lymph node dissection alone		124.80.0	Nationwide Children's Hospital	TCGA-E2-A1LG-D20672	166CD47F-16CF-45F5-8581-239149E00AD1	TCGA-E2-A1LG-F70390	F8B62F0A-6F64-498B-826E-51156ED65F81				Negative					Negative	Modified Radical Mastectomy				NO	31	16			203	126	0						NO	Paclitaxel	Allred score 0+0 = 0		53DEAB3C-8919-49EB-8A3A-694B4D9214F2		Scheduled Follow-up Submission
TCGA-A8-A092-01A					48	Left	Primary Tumor Field			47.97.0	Nationwide Children's Hospital	TCGA-A8-A092-D37796	2E5FD555-117E-45B5-BD9D-9F6653236007	TCGA-A8-A092-F40556	08BBC200-9E93-4FC1-8382-1CBF2310477F	TCGA-A8-A092-R38164	CF613056-FC7D-4604-89E3-ABBBC28E70AD		Positive					Positive	Other		n/a			31	23				181	0				273	181		Tamoxifen			A1E3FD4E-9377-4DF7-A56A-4F5DEA80C12B
TCGA-AO-A0J4-01A					41	Left	Primary Tumor Field	Sentinel node biopsy alone		56.90.0	Nationwide Children's Hospital	TCGA-AO-A0J4-D2749	60d39515-fbed-4588-80f8-0a3c0172f94e	TCGA-AO-A0J4-F15478	303D8EF0-9002-4B68-8E12-C5C5C5119275	TCGA-AO-A0J4-R2747	a5875abd-4fb2-48ad-9f4e-56c021726547								Lumpectomy			1	YES	31	22			175	131	0				294	265		Doxorubicin			3085AA2A-0254-4026-9C4C-E995D356D054		Scheduled Follow-up Submission
TCGA-EW-A3U0-01A					61	Left	Regional site	Sentinel lymph node biopsy plus axillary dissection		227.60.0	Nationwide Children's Hospital	TCGA-EW-A3U0-D42038	2ACE8F03-CCD2-49E1-BB73-5DC383D76E8C	TCGA-EW-A3U0-F42032	5FBF8A7F-C830-4250-B7C4-A372BC4DB5A7	TCGA-EW-A3U0-R42033	6E6A19AF-0B87-410E-AFCA-59AC61E7336D		Negative					Negative	Other				NO	31	9			197	148	0				281	229	NO	Cyclophosphamide			A91D1AA8-5B48-4EE9-BE4A-322070D75541
TCGA-A7-A5ZV-01A					62	Left	Primary Tumor Field	Sentinel node biopsy alone		296.54.0	Nationwide Children's Hospital	TCGA-A7-A5ZV-D43180	52DC65F2-30C0-4BDD-89AC-641853A9E429	TCGA-A7-A5ZV-F51143	135338BE-7C95-4141-AF1A-A7515A8E065D	TCGA-A7-A5ZV-R51144	D208F7C1-8594-4935-AAA9-D798639B925F		Negative					Negative	Lumpectomy				NO	31	8			193	151	0				316	270		Paclitaxel			CA2C8684-A2B1-45E7-963D-8692194FE4B4	2.5
TCGA-AR-A0U0-01A					73	Left Lower Inner Quadrant		Sentinel lymph node biopsy plus axillary dissection		74.87.0	Nationwide Children's Hospital			TCGA-AR-A0U0-F65068	795958AD-2E03-4480-B9E3-2EDF04451128	TCGA-AR-A0U0-R19618	DBAB51CF-D502-4C13-9478-26E924967804		Negative		0			Negative	Simple Mastectomy			1	YES	31	18					0										D9A835AA-E552-4444-BEE0-7C90F429EF3A		Scheduled Follow-up Submission
TCGA-AC-A62X-01A					72	Left Upper Inner Quadrant		Axillary lymph node dissection alone		305.50.0	Nationwide Children's Hospital			TCGA-AC-A62X-F64105	197F52A1-868A-492C-8E1B-A887CED07862				Positive					Negative	Modified Radical Mastectomy				NO	31	26					0									<10%	39111536-C233-482C-B8F8-3E82C9426FF7
TCGA-BH-A203-01A					78	Right				142.78.0	Nationwide Children's Hospital														Lumpectomy					31	8					0										C010D15D-074D-4113-8FA2-DB68AA0AE816
TCGA-BH-A203-11A					78	Right				142.78.0	Nationwide Children's Hospital														Lumpectomy					31	8					0										C010D15D-074D-4113-8FA2-DB68AA0AE816
TCGA-LL-A73Y-01A					67	Right Upper Inner Quadrant		Sentinel node biopsy alone		338.45.0	Nationwide Children's Hospital	TCGA-LL-A73Y-D51202	E1AF783B-A8A8-4502-92CE-C221FF5DE1BD	TCGA-LL-A73Y-F67099	E9959843-2F90-4BF2-B36D-9C4F8836A0E1				Negative	3 Point Scale	3+	3 Point Scale		Negative	Simple Mastectomy				NO	31	30			126	42	0							cytoxan			C4ECF062-8BD7-4143-9753-C5F6B11DBA29
TCGA-AC-A6IW-01A					73	Left Upper Outer Quadrant		Sentinel node biopsy alone		338.45.0	Nationwide Children's Hospital			TCGA-AC-A6IW-F64106	A62988AE-F527-4DAB-B4F0-F6FD96DC156F				Negative					Negative	Simple Mastectomy				YES	31	26					0									<10%	60DFB967-F9ED-4F54-9DED-35BCF46158EC
TCGA-A2-A0SU-01A					66	Left		Sentinel node biopsy alone		72.90.0	Nationwide Children's Hospital	TCGA-A2-A0SU-D3989	94ab7027-4e66-4e27-be4f-266bfe28933f	TCGA-A2-A0SU-F13954	95DB2CB9-9078-478C-8496-948B59DEABE3				Positive					Positive	Simple Mastectomy				YES	31	12				93	0							Arimidex		90-99%	9E2CB028-BDF0-4F96-B303-3A3B63A6ADDE		Scheduled Follow-up Submission
TCGA-E9-A1RG-01A					62	Right Upper Outer Quadrant	Regional site	Axillary lymph node dissection alone		120.76.0	Nationwide Children's Hospital	TCGA-E9-A1RG-D30649	6E4EA79B-DDD5-42BE-A154-8BD0E469C04B	TCGA-E9-A1RG-F39534	8AF68D77-E97C-4EA0-9609-FE1BC59C0186	TCGA-E9-A1RG-R30653	E189A27D-B536-4D3F-A1D3-7E38373AB1A7								Lumpectomy			1	NO	31	24			200	32	0				177	149	NO	Cyclophosphamide			520AB867-D448-4C94-AA3E-CF58D40FE152		Scheduled Follow-up Submission
TCGA-A2-A4S2-01A					62	Right	Regional site	Axillary lymph node dissection alone		271.56.0	Nationwide Children's Hospital	TCGA-A2-A4S2-D59084	8B0F87F5-E925-40EB-9A72-E44475BF4CB3	TCGA-A2-A4S2-F59085	89751129-F1B3-48E2-9375-C334B436639B	TCGA-A2-A4S2-R59116	5330A79E-4763-4522-A54F-B042170DDBAC		Positive	3 Point Scale	2+	3 Point Scale		Positive	Modified Radical Mastectomy				NO	31	30				261	0				271	261		Arimidex		90-99%	B3FB59F5-6E0D-4474-93B2-38585743F50F
TCGA-BH-A0HB-01A					55	Right	Primary Tumor Field	Sentinel node biopsy alone		61.88.0	Nationwide Children's Hospital	TCGA-BH-A0HB-D4710	FF1D11E0-7156-4A41-A367-D9A6CCF223CC	TCGA-BH-A0HB-F4718	557DF182-2E69-4738-AAFF-52D3BE340928	TCGA-BH-A0HB-R4716	6E84E476-DE82-4DF3-B4A6-C0EA750613AD								Other			1	NO	31	16			134	71	0				221	175		Docetaxel			4871E459-D054-4591-857E-26260BFA3AAC
TCGA-AO-A0JM-01A					40	Right	Regional site	Sentinel lymph node biopsy plus axillary dissection		61.88.0	Nationwide Children's Hospital	TCGA-AO-A0JM-D3232	425ca3d3-c246-49e1-9039-fa57865be48a	TCGA-AO-A0JM-F15496	3A5AB256-1C98-41B7-A84A-3BFB46668518	TCGA-AO-A0JM-R3229	7e8ccc49-defa-4a33-bd6a-edb852153291								Modified Radical Mastectomy			1	NO	31	22			177	134	0				294	260		PACLITAXEL			43BA3333-FD07-4CC3-A72D-97A06A0048CA
TCGA-A1-A0SP-01A					40	Right	Primary Tumor Field	Axillary lymph node dissection alone		72.90.0	Nationwide Children's Hospital	TCGA-A1-A0SP-D4489	D44AD8B4-4B21-4F10-A99A-EEB2C92222FD			TCGA-A1-A0SP-R4223	5E22E8A7-7CD2-4DED-A532-43CB2DEF4F91		Negative					Negative	Lumpectomy					31	7			173	108	0				259	215					79AE9ED3-9872-4E88-AFC8-E702DA63D68E
TCGA-AR-A1AJ-01A					83	Right	Primary Tumor Field	Sentinel lymph node biopsy plus axillary dissection		96.78.0	Nationwide Children's Hospital			TCGA-AR-A1AJ-F69269	E2C23026-41E4-4841-8697-7CCCD8C1E45B	TCGA-AR-A1AJ-R21731	77F74A3C-E216-4E1F-B44D-0012EB147360		Positive					Negative	Other			1	YES	31	31					0				79	47				10-19%	31DADB37-2D9E-4675-A980-03B58A922A74		Scheduled Follow-up Submission
TCGA-C8-A3M7-01A	NO	NO			60	Left Upper Inner Quadrant		Axillary lymph node dissection alone		216.63.0	Nationwide Children's Hospital			TCGA-C8-A3M7-F70838	BFE6A7FF-9238-485C-836E-9BE96855EF6D				Negative					Negative	Modified Radical Mastectomy				NO	31	9					0			1034			NO				2BFC7056-6E80-4313-9D8C-181076AEE4EC
TCGA-D8-A141-01A					40	Right		Axillary lymph node dissection alone		85.85.0	Nationwide Children's Hospital	TCGA-D8-A141-D64904	885E2338-5CEA-43F7-A449-B6C3AB636165	TCGA-D8-A141-F20734	3A9C552D-4EB1-455F-A421-E364643E5041				Positive					Positive	Modified Radical Mastectomy					31	14			113	50	0							tamoxifen	manual counting		43DE89EB-AE83-447E-B290-A47F2D5C85D7		Scheduled Follow-up Submission
TCGA-AO-A128-01A					61	Right	Primary Tumor Field	Sentinel node biopsy alone		80.83.0	Nationwide Children's Hospital	TCGA-AO-A128-D5943	e2154fbe-e02b-44f3-a61a-e08146c61db2	TCGA-AO-A128-F19405	CAAF9EFF-2A56-4182-A1F0-115AA2CDDAED	TCGA-AO-A128-R5880	a8fd3954-09d3-4dd2-8fa4-4e734dc2918b								Lumpectomy			1	YES	31	12			124	82	0				308	263		Doxorubicin			C0230F32-7123-4942-AD29-3CD8FF523A03		Scheduled Follow-up Submission
TCGA-BH-A0AY-01A					62	Left		Sentinel node biopsy alone		47.97.0	Nationwide Children's Hospital	TCGA-BH-A0AY-D15459	CEBF2E3D-12FA-496F-96BE-C677BBC8A801	TCGA-BH-A0AY-F15456	A54FAA28-CE61-4E7A-A5C4-2CC9FFE880CA				Positive					Positive	Simple Mastectomy				NO	31	3				209	0							Aromasin			02DE20D0-78C5-417E-9383-129C25B05DD5		Scheduled Follow-up Submission
TCGA-BH-A0AY-11A					62	Left		Sentinel node biopsy alone		47.97.0	Nationwide Children's Hospital	TCGA-BH-A0AY-D15459	CEBF2E3D-12FA-496F-96BE-C677BBC8A801	TCGA-BH-A0AY-F15456	A54FAA28-CE61-4E7A-A5C4-2CC9FFE880CA				Positive					Positive	Simple Mastectomy				NO	31	3				209	0							Aromasin			02DE20D0-78C5-417E-9383-129C25B05DD5		Scheduled Follow-up Submission
TCGA-BH-A0DG-01A					30	Right Upper Outer Quadrant	Primary Tumor Field			96.78.0	Nationwide Children's Hospital	TCGA-BH-A0DG-D63661	B7B05AD1-68C3-489B-A7EB-F57176297F1B	TCGA-BH-A0DG-F63658	8C3A54AE-5BD9-4011-ACE6-99D5A1D02FE2	TCGA-BH-A0DG-R63662	16BBF746-9D23-4F90-94B5-7C620BC39CFA		Positive					Negative	Other					31	14			166	48	0				181	166	NO	Cytoxan			503C128B-231C-4146-B4D9-F1D2EBD277A9
TCGA-BH-A0DG-11A					30	Right Upper Outer Quadrant	Primary Tumor Field			96.78.0	Nationwide Children's Hospital	TCGA-BH-A0DG-D63661	B7B05AD1-68C3-489B-A7EB-F57176297F1B	TCGA-BH-A0DG-F63658	8C3A54AE-5BD9-4011-ACE6-99D5A1D02FE2	TCGA-BH-A0DG-R63662	16BBF746-9D23-4F90-94B5-7C620BC39CFA		Positive					Negative	Other					31	14			166	48	0				181	166	NO	Cytoxan			503C128B-231C-4146-B4D9-F1D2EBD277A9
TCGA-A2-A0CS-01A					73	Left	Primary Tumor Field	Axillary lymph node dissection alone		85.85.0	Nationwide Children's Hospital	TCGA-A2-A0CS-D7277	c1d5ddf5-8870-4ff6-a547-018f3e5d0bc4	TCGA-A2-A0CS-F59316	B08C8976-E321-45FD-AC53-648FE294B2C1	TCGA-A2-A0CS-R7285	a50ef65d-3b95-41e4-82e7-f0ab5f9ae804		Positive					Positive	Modified Radical Mastectomy			1	NO	31	8				190	0				161	106		Anastrozole		80-89%	D83A6D6F-C488-4628-B03A-32AA25C07EC5		Scheduled Follow-up Submission
TCGA-AN-A0FX-01A					52	Left Upper Outer Quadrant		No axillary staging		56.90.0	Nationwide Children's Hospital			TCGA-AN-A0FX-F68967	29111D0E-E852-4132-98D1-EFDEB235F4F6				Negative					Negative	Modified Radical Mastectomy				NO	31	24					0										D091D2C7-C114-482C-8261-C4EC516FAB34
TCGA-A8-A090-01A					74	Right				47.97.0	Nationwide Children's Hospital								Positive					Positive	Other					31	27					0										D83385F9-6AA8-4FDD-99C7-D7AF9295E445
TCGA-AC-A8OP-01A					72	Right Lower Inner Quadrant		Sentinel node biopsy alone		372.39.0	Nationwide Children's Hospital			TCGA-AC-A8OP-F66027	051ED97E-B012-42EF-BD2D-25AF9EE444F3				Positive					Positive	Simple Mastectomy				YES	31	1					0									90-99%	9847DD3D-C729-471C-BC70-9552B3FD5EF7
TCGA-A8-A09B-01A					58	Left	Primary Tumor Field			47.97.0	Nationwide Children's Hospital	TCGA-A8-A09B-D37801	A108C623-BC80-4675-931F-301E1BA62157	TCGA-A8-A09B-F40550	67B93484-7627-4EB4-82E5-189B57D36AC1	TCGA-A8-A09B-R38165	1528A1EE-7C4B-4B8A-AFCC-46098B902021		Positive					Positive	Other		n/a			31	23			242	153	0				181	153		Anastrozole			FE192A95-5590-4585-86E4-5B820AD42559
TCGA-AO-A0J8-01A					61	Right	Primary Tumor Field	Sentinel node biopsy alone		56.90.0	Nationwide Children's Hospital	TCGA-AO-A0J8-D3136	082d6734-1bb5-4efc-90a5-d63188cb7651	TCGA-AO-A0J8-F15482	7F5BA75D-9EB6-4BD5-AC2E-101D65FBEB78	TCGA-AO-A0J8-R3129	7699227a-2529-4bd0-bb64-08d7ffbe4aad								Lumpectomy			1	YES	31	22			224	63	0				281	252		METHOTREXATE			05FDF22E-05BF-4B42-BDB1-72320D09A6CD		Scheduled Follow-up Submission
TCGA-BH-A1FR-01A					73	Right Upper Inner Quadrant				109.88.0	Nationwide Children's Hospital								Positive					Positive	Other					31	8					0										02F4E1E1-27B4-4D1A-8089-F23524435B54
TCGA-BH-A1FR-11B					73	Right Upper Inner Quadrant				109.88.0	Nationwide Children's Hospital								Positive					Positive	Other					31	8					0										02F4E1E1-27B4-4D1A-8089-F23524435B54
TCGA-EW-A1J6-01A					70	Right Upper Inner Quadrant		Sentinel node biopsy alone		109.88.0	Nationwide Children's Hospital	TCGA-EW-A1J6-D21611	DE34FA0A-12BB-466B-9E7B-053B947EC696	TCGA-EW-A1J6-F21347	8D84D7F5-C455-4390-BCC6-C33048E6CC19				Positive	3 Point Scale	3+	3 Point Scale		Positive	Lumpectomy				YES	31	6				111	0						NO	Femara		90-99%	13F53576-496A-40EB-A4D5-8C99078786C4		Scheduled Follow-up Submission
TCGA-AN-A0AS-01A					70	Left Upper Outer Quadrant		No axillary staging		47.97.0	Nationwide Children's Hospital			TCGA-AN-A0AS-F68947	6DA8757D-7D76-4A0B-B31F-24A36D38E1F8				Positive		0			Negative	Modified Radical Mastectomy				NO	31	23					0										133A900F-4C42-4995-8673-5D11D2F7AF2C
TCGA-LL-A5YP-01A					49	Right Lower Inner Quadrant	Primary Tumor Field	Sentinel lymph node biopsy plus axillary dissection		296.54.0	Nationwide Children's Hospital	TCGA-LL-A5YP-D59325	F5B3F5A9-5B54-4D89-94D1-B44F2A5E2881	TCGA-LL-A5YP-F59323	447B3E95-78F4-48F2-86F1-C67294C4D37C	TCGA-LL-A5YP-R59327	1B2D1DFE-6C4A-47FD-98BA-CAF7E1D38BE3		Positive	3 Point Scale		3 Point Scale		Negative	Modified Radical Mastectomy				NO	31	8				302	0				266	225		arimidex		<10%	D2E49EC7-3422-4A0E-8975-9B09C601E994	35
TCGA-AR-A1AH-01A					51	Right Upper Inner Quadrant		Axillary lymph node dissection alone		93.85.0	Nationwide Children's Hospital	TCGA-AR-A1AH-D21712	37BF063D-A8DE-410C-991D-B2FD6B00EA10	TCGA-AR-A1AH-F69267	39F31D97-DBEF-45B5-BF5A-73B8859724B9				Positive					Negative	Other					31	31			2241		0							Tamoxifen		10-19%	9AEBD621-D604-4EC7-83B2-A9CB82DF1C9F		Scheduled Follow-up Submission
TCGA-A8-A093-01A					61	Right	Primary Tumor Field			47.97.0	Nationwide Children's Hospital	TCGA-A8-A093-D37755	53987C58-785E-4E57-B53F-0CBD9C1C3579	TCGA-A8-A093-F40555	376223F3-2A05-4951-B83B-C798FF047DFD	TCGA-A8-A093-R38155	A04E3037-0795-4C6C-8BD3-D7C3FB72AF9B		Positive					Positive	Other		n/a			31	23				28	0				59	28		Tamoxifen			FC5C1107-4173-422D-A259-5A39C254E751
TCGA-AN-A0XW-01A					36	Left Upper Outer Quadrant		Sentinel node biopsy alone		74.87.0	Nationwide Children's Hospital			TCGA-AN-A0XW-F68963	038DA5D7-B5DC-4B04-9B85-82C2912AE73A				Positive	3 Point Scale	3+	3 Point Scale		Positive					NO	31	23					0						NO		dextran coated charcoal	90-99%	EA3A413D-AA61-4939-A6E1-6C29D7E503C1
TCGA-GM-A2DK-01A					58	Right Upper Outer Quadrant	Primary Tumor Field	Sentinel node biopsy alone		167.74.0	Nationwide Children's Hospital	TCGA-GM-A2DK-D47097	F92A5EEC-9F0D-4B49-8D7C-15E038B017EA	TCGA-GM-A2DK-F47094	1C4E8267-609B-4503-AFC4-77F7B38531A0	TCGA-GM-A2DK-R47095	0F34A3E2-169D-4D79-B883-9E14DADAF2DD		Positive					Negative	Lumpectomy				YES	31	22			1893	79	0				135	93	NO	Arimidex		90-99%	6D89C988-5F53-4C90-8A3B-F5EABCD61834
TCGA-BH-A1F8-01A					90	Left				109.88.0	Nationwide Children's Hospital								Positive					Positive	Modified Radical Mastectomy					31	7					0										CCD037D5-6418-473A-A3C4-79626FCB7E08
TCGA-BH-A1F8-11B					90	Left				109.88.0	Nationwide Children's Hospital								Positive					Positive	Modified Radical Mastectomy					31	7					0										CCD037D5-6418-473A-A3C4-79626FCB7E08
TCGA-AO-A12C-01A					42	Left	Regional site	Sentinel lymph node biopsy plus axillary dissection		80.83.0	Nationwide Children's Hospital	TCGA-AO-A12C-D5966	6147d681-b15d-4868-86c9-8f70bb709894	TCGA-AO-A12C-F19425	C6079795-077B-4961-8C09-C9FAF4B8C1A2	TCGA-AO-A12C-R5890	6902c82f-5fd7-4dcd-95bf-c393615f7531	Negative					Modified radical mastectomy		Lumpectomy			1	NO	31	12			158	116	0				321	277		Doxorubicin			27E7C491-3CE6-4A1B-B6F8-5C739410E55F		Scheduled Follow-up Submission
TCGA-OL-A5RY-01A					52	Right		Sentinel node biopsy alone		296.54.0	Nationwide Children's Hospital			TCGA-OL-A5RY-F56565	EC19B71A-1285-42EF-836D-0AEA3910712B			Negative	Positive				Mastectomy NOS	Negative	Lumpectomy					31	14					0									10-19%	60252146-03F8-4E62-AB8C-1E090458DFD5
TCGA-C8-A26Z-01A					59	Right Upper Inner Quadrant				147.75.0	Nationwide Children's Hospital	TCGA-C8-A26Z-D70836	D3391CBA-5CB0-47AE-9813-D21384BF7466	TCGA-C8-A26Z-F70835	EA721DF8-5AD0-46F3-A433-3CEF5C43AF19				Positive					Positive	Other					31	9				11	0						NO	Tamoxifen			687BB348-5D4A-44EC-83C5-37DC1D319CC1		Scheduled Follow-up Submission
TCGA-A8-A099-01A					76	Right	Primary Tumor Field			47.97.0	Nationwide Children's Hospital	TCGA-A8-A099-D37807	0287D246-1FC1-4967-B545-E9D3A91C35A9	TCGA-A8-A099-F40552	B6F0CCAB-A857-4381-8721-9D235581ADA6	TCGA-A8-A099-R38167	E30C6BD0-6060-41EC-8F04-8DA25A39056F		Positive					Positive	Other		n/a			31	23				61	0				123	92		Exemestane			87C637BA-A3D5-453E-8229-3086151CB998
TCGA-BH-A0B7-01A					42	Right	Regional site			85.85.0	Nationwide Children's Hospital	TCGA-BH-A0B7-D58722	4F4B553E-E1BA-43B5-AA88-811D9E6FE6A1	TCGA-BH-A0B7-F58717	9C4412C3-9117-491D-9B4E-9579762E7EF3	TCGA-BH-A0B7-R58720	F586906B-024C-452A-9A32-350AFD7F2932		Positive					Positive	Other					31	22			378	196	0				356	305	NO	Taxol			B6F32269-DD8D-4A36-ABDB-B03E4F5A84CF
TCGA-BH-A0B7-11A					42	Right	Regional site			85.85.0	Nationwide Children's Hospital	TCGA-BH-A0B7-D58722	4F4B553E-E1BA-43B5-AA88-811D9E6FE6A1	TCGA-BH-A0B7-F58717	9C4412C3-9117-491D-9B4E-9579762E7EF3	TCGA-BH-A0B7-R58720	F586906B-024C-452A-9A32-350AFD7F2932		Positive					Positive	Other					31	22			378	196	0				356	305	NO	Taxol			B6F32269-DD8D-4A36-ABDB-B03E4F5A84CF
TCGA-BH-A1FN-01A					34	Right Upper Outer Quadrant				109.88.0	Nationwide Children's Hospital								Positive					Positive	Other					31	8					0										F1C2A6F7-CD0B-4E7C-86BD-671BF5894C0A
TCGA-BH-A1FN-11A					34	Right Upper Outer Quadrant				109.88.0	Nationwide Children's Hospital								Positive					Positive	Other					31	8					0										F1C2A6F7-CD0B-4E7C-86BD-671BF5894C0A
TCGA-A2-A0CR-01A					54	Left Upper Inner Quadrant		Axillary lymph node dissection alone		227.60.0	Nationwide Children's Hospital	TCGA-A2-A0CR-D32695	4B109ECE-53BB-4544-A269-3DBBEFFDF432	TCGA-A2-A0CR-F42400	C3D189CF-D8DD-4B02-9DD3-68CCA1F0579F				Positive	3 Point Scale	3+	3 Point Scale		Positive	Modified Radical Mastectomy				NO	31	18				315	0						NO	Anastrazole		60-69%	B0476B2C-CE97-45D4-B9A4-4FFC1612D7D9
TCGA-C8-A1HJ-01A					53	Right		Axillary lymph node dissection alone		109.88.0	Nationwide Children's Hospital								Negative					Negative	Other					31	1					0						NO				53E9165F-95EA-4804-91CB-9309AED1271D
TCGA-AC-A23G-01A					76	Right Upper Inner Quadrant				202.69.0	Nationwide Children's Hospital	TCGA-AC-A23G-D43246	8C1BBA20-CDAA-4C57-BAE6-BF46E12CFDE0	TCGA-AC-A23G-F43241	CBABBD3D-7093-4CB3-9F87-A561F537C731				Positive					Positive	Other					31	15				237	0						NO	Arimidex		90-99%	94421058-18A1-4154-AEDE-6B079E2E6237
TCGA-AC-A23G-11A					76	Right Upper Inner Quadrant				202.69.0	Nationwide Children's Hospital	TCGA-AC-A23G-D43246	8C1BBA20-CDAA-4C57-BAE6-BF46E12CFDE0	TCGA-AC-A23G-F43241	CBABBD3D-7093-4CB3-9F87-A561F537C731				Positive					Positive	Other					31	15				237	0						NO	Arimidex		90-99%	94421058-18A1-4154-AEDE-6B079E2E6237
TCGA-BH-A0HP-01A					65	Left	Primary Tumor Field	Axillary lymph node dissection alone		72.90.0	Nationwide Children's Hospital	TCGA-BH-A0HP-D4777	B29234C4-907F-4C3B-9AE1-ECF150514F2E	TCGA-BH-A0HP-F4784	DD04D583-3871-4317-908D-8EDD22A879B7	TCGA-BH-A0HP-R4782	2A420110-2D52-44D7-BF2D-5A5C6907AABE								Modified Radical Mastectomy			1	NO	31	16				347	0				330	275		Arimidex			9DB1DC78-AFA1-4122-9357-DBD5A874A151
TCGA-AR-A0U3-01A					59	Left Upper Outer Quadrant	Primary Tumor Field	Sentinel lymph node biopsy plus axillary dissection		74.87.0	Nationwide Children's Hospital	TCGA-AR-A0U3-D19031	13CF7E01-51DD-4494-8E95-4C20C42A3E50	TCGA-AR-A0U3-F49481	AABD784B-86D7-4F0B-B4BC-E08E71337DD7	TCGA-AR-A0U3-R18476	E1B639A5-3CE0-4F0C-8250-286B8927236C		Positive					Positive	Other			1	NO	31	2			69	41	0				210	171		Cytoxan		10-19%	B2056518-01FF-4DAE-B53B-1E317E7D19D5		Scheduled Follow-up Submission
TCGA-A2-A0D3-01A					42	Left Lower Outer Quadrant		Sentinel node biopsy alone		85.85.0	Nationwide Children's Hospital	TCGA-A2-A0D3-D7254	b8248a0e-7dbf-47a8-a4d5-83d530250db9	TCGA-A2-A0D3-F59451	A98415CB-B3AF-4EF9-A0C2-EE010FC9D9E6				Positive					Positive	Simple Mastectomy				YES	31	13			196	69	0							Herceptin		90-99%	8633D590-F72B-4A81-BB70-C43B32821A1A		Scheduled Follow-up Submission
TCGA-BH-A0DX-01A					62	Left Upper Inner Quadrant	Primary Tumor Field			85.85.0	Nationwide Children's Hospital	TCGA-BH-A0DX-D59141	E8FE1855-0A33-4663-A2E3-605059890515	TCGA-BH-A0DX-F59135	982B9831-0BBC-4677-99EB-6A34B28D422C	TCGA-BH-A0DX-R59136	CBDB023B-245F-4480-B77C-958E1430C45A		Positive					Positive	Other					31	1			171	143	0				221	171	NO	Methotrexate			1FCC0DF4-C883-41C4-86F1-BCB61D688A10
TCGA-E2-A15R-01A					64	Right Upper Outer Quadrant	Regional site	Sentinel node biopsy alone		85.85.0	Nationwide Children's Hospital	TCGA-E2-A15R-D19173	1B56D8BF-E538-4CCC-B9F5-1F7CC5EA6366	TCGA-E2-A15R-F70011	942E79FF-F95B-4D03-A700-778F79C4083A	TCGA-E2-A15R-R19175	DD5ECAD9-B60E-43D2-A390-69CCC0C71FD3		Positive					Positive	Lumpectomy			01	NO	31	9			197	148	0				267	218	NO	paclitaxel	Allred score 5+3 = 8		1891732E-0EA3-4FBD-B563-413EB2ADAAD5	1.9	Scheduled Follow-up Submission
TCGA-D8-A27T-01A					53	Right Lower Outer Quadrant	Primary Tumor Field	Sentinel lymph node biopsy plus axillary dissection		147.75.0	Nationwide Children's Hospital	TCGA-D8-A27T-D30098	8592A3D1-BE31-4706-AC39-9C5D149F0914	TCGA-D8-A27T-F30096	2B56379D-571E-4B7B-B40D-9720573C8983	TCGA-D8-A27T-R30099	FA4577E5-E322-4AEF-9C38-1D265D740A86		Positive					Positive	Simple Mastectomy				NO	31	2			220	115	0				301	272	NO	doxorubicine+cyclophosphamide	manual counting		32A66232-713D-4CB7-A4F7-E13AF19E1DBC		Scheduled Follow-up Submission
TCGA-B6-A0WZ-01A					50	Right		Axillary lymph node dissection alone		74.87.0	Nationwide Children's Hospital			TCGA-B6-A0WZ-F71575	B36349B9-27D9-4343-9447-A347465484A3				Positive					Positive	Other				NO	31	30					0		5117	5117					Image Analysis		5C77F5E0-CC2D-4F90-8E03-ABEE6869E089		Scheduled Follow-up Submission
TCGA-S3-AA15-01A					51	Right Upper Inner Quadrant	Primary Tumor Field	Sentinel lymph node biopsy plus axillary dissection		379.34.0	Nationwide Children's Hospital	TCGA-S3-AA15-D58383	B4C53B22-0A11-4216-A8A3-EE51B419C715	TCGA-S3-AA15-F67625	516DF8F3-0887-44F0-B851-A01356DE4536	TCGA-S3-AA15-R67624	FE3E452E-46DC-46B1-9014-9F6A43D28C78		Negative			3 Point Scale		Negative	Simple Mastectomy				YES	31	7			236	138	0				359	286		TAXOL	CAP SCORING GUIDELINE 2010		5E0D0907-3C75-4DC2-B41D-76AD46523D46
TCGA-E2-A15L-01A					65	Right		Sentinel node biopsy alone		93.85.0	Nationwide Children's Hospital	TCGA-E2-A15L-D18887	50C9B52E-A733-4A39-89C6-A845EDDC1CC5	TCGA-E2-A15L-F18885	CA37A855-FA95-4FBE-A554-B8424DF1544F				Positive					Positive	Simple Mastectomy				NO	31	15				45	0						NO	Arimidex	Allred score 5+3 = 8		712AC1B6-D77D-42A0-A85A-BD8425A1B224		Scheduled Follow-up Submission
TCGA-E2-A15L-11A					65	Right		Sentinel node biopsy alone		93.85.0	Nationwide Children's Hospital	TCGA-E2-A15L-D18887	50C9B52E-A733-4A39-89C6-A845EDDC1CC5	TCGA-E2-A15L-F18885	CA37A855-FA95-4FBE-A554-B8424DF1544F				Positive					Positive	Simple Mastectomy				NO	31	15				45	0						NO	Arimidex	Allred score 5+3 = 8		712AC1B6-D77D-42A0-A85A-BD8425A1B224		Scheduled Follow-up Submission
TCGA-A2-A0CP-01A					60	Right	Primary Tumor Field	Sentinel node biopsy alone		56.90.0	Nationwide Children's Hospital	TCGA-A2-A0CP-D2004	6a6c88d1-1963-4a43-b81a-b46a280df51f	TCGA-A2-A0CP-F13741	7BF10142-06B6-4D5A-BF38-AE1D5E2468DF	TCGA-A2-A0CP-R2001	2bd9726c-9c8e-4177-a060-ea91da683282		Positive					Positive	Lumpectomy			1	YES	31	10			2043	206	0				210	163		Anastrozole		90-99%	110746EF-8703-4F86-8BC6-0C5B216A4629		Scheduled Follow-up Submission
TCGA-A7-A425-01A					70	Right	Regional site	Sentinel lymph node biopsy plus axillary dissection		255.56.0	Nationwide Children's Hospital	TCGA-A7-A425-D41690	3E02A5A3-AF45-42DE-BF76-E56FAE2440DA	TCGA-A7-A425-F41648	8EE1DAAF-2EFE-4CA4-B494-4674A8AC9C79	TCGA-A7-A425-R41726	F05F3412-8D0F-4DA4-9950-3B625351074E		Positive	3 Point Scale	2+	3 Point Scale		Positive	Modified Radical Mastectomy				YES	31	25				378	0			443	352	317		Arimidex		90-99%	A22005E1-3CC8-43BF-AEC1-DD6CB846553F	2.5
TCGA-BH-A0E1-01A					52	Left		Sentinel lymph node biopsy plus axillary dissection		61.88.0	Nationwide Children's Hospital	TCGA-BH-A0E1-D4604	87AC4755-E995-47CF-90E0-FDD408456387	TCGA-BH-A0E1-F4631	CFD1B195-8DD2-421F-B5EC-E88E05B12781										Simple Mastectomy				NO	31	16				349	0							ARIMIDEX			ED869685-C1CD-4EF7-86A5-B366A248B410
TCGA-BH-A0E1-11A					52	Left		Sentinel lymph node biopsy plus axillary dissection		61.88.0	Nationwide Children's Hospital	TCGA-BH-A0E1-D4604	87AC4755-E995-47CF-90E0-FDD408456387	TCGA-BH-A0E1-F4631	CFD1B195-8DD2-421F-B5EC-E88E05B12781										Simple Mastectomy				NO	31	16				349	0							ARIMIDEX			ED869685-C1CD-4EF7-86A5-B366A248B410
TCGA-AO-A0JA-01A			NO		36	Right		Sentinel lymph node biopsy plus axillary dissection		61.88.0	Nationwide Children's Hospital	TCGA-AO-A0JA-D3170	357e7201-60df-425e-9cab-dd4722ff6b34	TCGA-AO-A0JA-F15484	DE973A94-D71D-421F-9511-557735C21273										Modified Radical Mastectomy				NO	31	22				292	0			143				PACLITAXEL			8CD8D2EC-E296-4E00-8097-894222398E6B		Scheduled Follow-up Submission
TCGA-EW-A1PG-01A					53	Left Lower Outer Quadrant		Sentinel lymph node biopsy plus axillary dissection		117.78.0	Nationwide Children's Hospital	TCGA-EW-A1PG-D29645	A507200D-0651-4B04-951A-3B520607A972	TCGA-EW-A1PG-F29103	8BA6C3BB-BF54-4173-8FD5-BD3A864EA6EC				Positive	3 Point Scale	3+	3 Point Scale		Positive	Modified Radical Mastectomy				YES	31	8			262	157	0						NO	Docetaxel		90-99%	99C5C32B-09B8-43BD-8E2D-24EAE50F9353		Scheduled Follow-up Submission
TCGA-E2-A14T-01A					52	Left Upper Inner Quadrant		Sentinel node biopsy alone		85.85.0	Nationwide Children's Hospital	TCGA-E2-A14T-D18818	491C04CD-29DC-4BA7-AC0E-EB33E9119638	TCGA-E2-A14T-F70396	A5C92857-ABED-45D2-8326-E7A5DFA71B1F				Positive					Positive	Simple Mastectomy				NO	31	17			89	47	0						NO	Doxorubicin	Allred score 5+3 = 8		CFBD6BC8-4E66-47E8-9E7C-ED179E990E26		Scheduled Follow-up Submission
TCGA-OK-A5Q2-01A					59	Right		Axillary lymph node dissection alone		288.54.0	Nationwide Children's Hospital								Positive	3 Point Scale	3+	3 Point Scale		Positive	Modified Radical Mastectomy				YES	31	22					0									90-99%	3CBF6896-DF20-4778-9D76-90966408AAAB
TCGA-AC-A8OS-01A					71	Right Upper Outer Quadrant		Sentinel node biopsy alone		379.34.0	Nationwide Children's Hospital								Positive					Positive	Simple Mastectomy				YES	31	26					0									90-99%	CA42DA37-E84D-42D8-959B-8284A53454A9
TCGA-BH-A0DZ-01A					43	Right		Sentinel lymph node biopsy plus axillary dissection		47.97.0	Nationwide Children's Hospital	TCGA-BH-A0DZ-D4585	5C77B282-C471-4C6B-83CC-468EB487B8F5	TCGA-BH-A0DZ-F4588	F7218F8F-0D41-4B86-B276-C020CA69412E										Simple Mastectomy				NO	31	16			224	89	0							HERCEPTIN			FBB90671-2E7D-4632-808C-F35032DA2307
TCGA-BH-A0DZ-11A					43	Right		Sentinel lymph node biopsy plus axillary dissection		47.97.0	Nationwide Children's Hospital	TCGA-BH-A0DZ-D4585	5C77B282-C471-4C6B-83CC-468EB487B8F5	TCGA-BH-A0DZ-F4588	F7218F8F-0D41-4B86-B276-C020CA69412E										Simple Mastectomy				NO	31	16			224	89	0							HERCEPTIN			FBB90671-2E7D-4632-808C-F35032DA2307
TCGA-BH-A6R9-01A					61	Left				334.45.0	Nationwide Children's Hospital			TCGA-BH-A6R9-F63678	D2AF96B0-8735-4AE4-9821-E64B25949D6E				Negative					Positive	Modified Radical Mastectomy					31	15					0										D2943300-B3CA-4774-A82A-BE97EA9EEB8A
TCGA-E2-A1B6-01A					44	Left		Sentinel node biopsy alone		96.78.0	Nationwide Children's Hospital	TCGA-E2-A1B6-D19399	3110E408-194F-4231-98AC-379E031BB58E	TCGA-E2-A1B6-F19389	52C7E9E7-E0FB-4221-B4AF-7EDF9586E0D6				Negative					Negative	Simple Mastectomy				NO	31	8			163		0						NO	Cytoxan	Allred score 0+0 = 0		5D270660-F0F1-4533-AA04-A65C2A699AF2		Scheduled Follow-up Submission
TCGA-GM-A2DN-01A					58	Left Upper Outer Quadrant		Sentinel lymph node biopsy plus axillary dissection		167.74.0	Nationwide Children's Hospital	TCGA-GM-A2DN-D47130	F102C2E8-AC64-42D3-8420-DD1DF9F856C0	TCGA-GM-A2DN-F47124	8C417396-011E-4C2E-B08C-42A8A47EA1D7				Positive					Positive	Modified Radical Mastectomy				YES	31	22			1063	335	0						NO	Arimidex		90-99%	FE080BBB-3652-455D-9953-747766843A95
TCGA-EW-A1OZ-01A					56	Left Upper Outer Quadrant		Sentinel node biopsy alone		117.78.0	Nationwide Children's Hospital	TCGA-EW-A1OZ-D30295	AABA0EBE-E734-4D86-883A-695AB14363E4	TCGA-EW-A1OZ-F29098	652D6657-335D-47DD-B917-8793B786C736				Positive	3 Point Scale		3 Point Scale		Negative	Other				YES	31	8			291	256	0						NO	Paclitaxel		90-99%	734431DD-42C7-42CA-9E7D-8435A5EF68FE	2	Scheduled Follow-up Submission
TCGA-AR-A0TY-01A					54	Right Upper Outer Quadrant		Sentinel lymph node biopsy plus axillary dissection		85.85.0	Nationwide Children's Hospital	TCGA-AR-A0TY-D19590	67BBC709-F34C-473D-AFB4-E8E35852ED65	TCGA-AR-A0TY-F18561	78C812FE-1E96-434A-AA4B-15BF524153A4				Positive		0			Negative	Simple Mastectomy				YES	31	15			557		0			544				Anastrozole		10-19%	79BB9942-D320-448C-9E84-3C5B8A1A19EA		Scheduled Follow-up Submission
TCGA-A2-A0T7-01A					51	Right Upper Inner Quadrant		Sentinel node biopsy alone		72.90.0	Nationwide Children's Hospital	TCGA-A2-A0T7-D3999	55597860-77c6-472c-8515-75406e8ee3b4	TCGA-A2-A0T7-F13953	ADD4998E-EC7F-4B93-8D24-3920CCC4FE34			Negative	Positive		2+		Other	Positive	Modified Radical Mastectomy	Skin excision			YES	31	12			145	117	0							Adriamycin		90-99%	61BDCFCE-E3AB-4675-8945-8487962EA083		Scheduled Follow-up Submission
TCGA-BH-A1F0-01A					80	Left				103.78.0	Nationwide Children's Hospital								Negative					Indeterminate	Modified Radical Mastectomy					31	7					0										10CE2A26-58C9-45B6-A9C3-55275449BE97
TCGA-BH-A1F0-11B					80	Left				103.78.0	Nationwide Children's Hospital								Negative					Indeterminate	Modified Radical Mastectomy					31	7					0										10CE2A26-58C9-45B6-A9C3-55275449BE97
TCGA-BH-A0BM-01A					54	Right		Sentinel lymph node biopsy plus axillary dissection		61.88.0	Nationwide Children's Hospital	TCGA-BH-A0BM-D4484	07017073-10D9-4DD4-878C-E519D915D613	TCGA-BH-A0BM-F34064	23464ADF-8E8E-4359-AA9A-0D6C5E3A3BBD				Positive		0			Negative	Lumpectomy				NO	31	29			229	164	0							TAXOTERE			542AF642-24F1-43E9-9618-2D964C3BD89A		Scheduled Follow-up Submission
TCGA-BH-A0BM-11A					54	Right		Sentinel lymph node biopsy plus axillary dissection		61.88.0	Nationwide Children's Hospital	TCGA-BH-A0BM-D4484	07017073-10D9-4DD4-878C-E519D915D613	TCGA-BH-A0BM-F34064	23464ADF-8E8E-4359-AA9A-0D6C5E3A3BBD				Positive		0			Negative	Lumpectomy				NO	31	29			229	164	0							TAXOTERE			542AF642-24F1-43E9-9618-2D964C3BD89A		Scheduled Follow-up Submission
TCGA-A8-A07J-01A					35	Right Upper Outer Quadrant	Primary Tumor Field			47.97.0	Nationwide Children's Hospital	TCGA-A8-A07J-D37872	3048378F-307F-4B1C-8A8E-286754868C32	TCGA-A8-A07J-F40829	17B903FF-A6D0-49CC-A697-C524DE70E422	TCGA-A8-A07J-R38186	D420AEC4-2B57-4231-822E-611BDD49C141		Positive					Positive	Other					31	2				184	0				184	153		Tamoxifen			F73A1E2C-D8B3-45F5-9572-48744721F0CD
TCGA-AR-A0U2-01A					47	Left Lower Outer Quadrant		Axillary lymph node dissection alone		74.87.0	Nationwide Children's Hospital	TCGA-AR-A0U2-D19596	320E795E-E0E7-4F90-9D11-014ABF0FF2BD	TCGA-AR-A0U2-F18483	C7F93BF3-479C-4CE3-AC96-DEBDBE56649C	TCGA-AR-A0U2-R19591	572AD134-752F-4FAD-B70B-3FB15869115B	Negative	Positive					Positive	Modified Radical Mastectomy			1	NO	31	15			1603		0			1609				Exemestane		10-19%	AF49472B-E4CB-4D53-B0C8-CB5F1AA2A046		Scheduled Follow-up Submission
TCGA-LL-A740-01A					61	Right Upper Outer Quadrant		Sentinel node biopsy alone		334.45.0	Nationwide Children's Hospital	TCGA-LL-A740-D65062	25DBA480-441A-4F69-9824-94ADC2AACDB4	TCGA-LL-A740-F65059	1639524D-0C7A-4F66-8F84-322D2A41C448				Negative	3 Point Scale		3 Point Scale		Negative	Lumpectomy				YES	31	18			255	178	0							TAXOL			6C8F85E1-B41E-4785-A2F6-18CDFC01CF0B	2.9
TCGA-S3-A6ZH-01A					29	Left Upper Outer Quadrant	Regional site	Axillary lymph node dissection alone		334.45.0	Nationwide Children's Hospital	TCGA-S3-A6ZH-D63643	58C4FEBB-B269-490F-9AB4-8D95373717EF	TCGA-S3-A6ZH-F63625	8AB33E9F-54C0-49A3-862C-14A9E04C144C	TCGA-S3-A6ZH-R63634	AFC090C0-5CB1-47EF-B9B4-4D7AEE7ADCA5		Positive	3 Point Scale		3 Point Scale		Positive	Simple Mastectomy				NO	31	27				293	0				351	304		TAMOXIFEN		90-99%	03C97A8D-B556-430E-87F6-851A47A453B1	69
TCGA-A7-A13F-01A					44	Right Upper Outer Quadrant	Regional site	Sentinel lymph node biopsy plus axillary dissection		96.78.0	Nationwide Children's Hospital	TCGA-A7-A13F-D17801	D0D604CB-1045-4D02-AC97-F5AE8513DA0F	TCGA-A7-A13F-F39779	C0C53386-68E4-4D29-ABF4-1C85462AE7DD	TCGA-A7-A13F-R17807	DB4D2F46-F9F4-4A31-92E4-B09C3567DBA0		Positive					Positive	Modified Radical Mastectomy			1	NO	31	1				358	0				246	211		Arimidex			20356276-081A-4F52-8494-40FE05994D32	2.8	Scheduled Follow-up Submission
TCGA-A7-A13F-11A					44	Right Upper Outer Quadrant	Regional site	Sentinel lymph node biopsy plus axillary dissection		96.78.0	Nationwide Children's Hospital	TCGA-A7-A13F-D17801	D0D604CB-1045-4D02-AC97-F5AE8513DA0F	TCGA-A7-A13F-F39779	C0C53386-68E4-4D29-ABF4-1C85462AE7DD	TCGA-A7-A13F-R17807	DB4D2F46-F9F4-4A31-92E4-B09C3567DBA0		Positive					Positive	Modified Radical Mastectomy			1	NO	31	1				358	0				246	211		Arimidex			20356276-081A-4F52-8494-40FE05994D32	2.8	Scheduled Follow-up Submission
TCGA-LL-A5YO-01A					50	Left Upper Outer Quadrant	Primary Tumor Field	Sentinel node biopsy alone		296.54.0	Nationwide Children's Hospital	TCGA-LL-A5YO-D43018	9E63512F-49BD-4691-8C4D-920BA81A33D7	TCGA-LL-A5YO-F58638	8D9AF5E1-0A39-49CE-9F74-CB0D3A1E192E	TCGA-LL-A5YO-R58642	4B671EF3-EA8C-45F5-9CCC-C2189FB3DF30		Negative					Negative	Lumpectomy				YES	31	17			160	56	0				210	192		CYTOXAN			3B58A5B7-6824-435F-8A6C-DD3336F377D3
TCGA-BH-A0DI-01A					63	Right	Primary Tumor Field			96.78.0	Nationwide Children's Hospital	TCGA-BH-A0DI-D58709	443925EA-94E1-4E24-96E1-9D9EAC2A280A	TCGA-BH-A0DI-F58698	31AD28DA-0E4B-4F0D-95BF-E74BE74D8070	TCGA-BH-A0DI-R58706	638AB258-DB1B-4910-9106-5FA88FB73D59		Positive					Positive	Modified Radical Mastectomy					31	22			319	215	0				369	363	NO	Taxol			96DE7106-568A-4CD9-A274-E240A6EC4CE0
TCGA-BH-A0DI-11A					63	Right	Primary Tumor Field			96.78.0	Nationwide Children's Hospital	TCGA-BH-A0DI-D58709	443925EA-94E1-4E24-96E1-9D9EAC2A280A	TCGA-BH-A0DI-F58698	31AD28DA-0E4B-4F0D-95BF-E74BE74D8070	TCGA-BH-A0DI-R58706	638AB258-DB1B-4910-9106-5FA88FB73D59		Positive					Positive	Modified Radical Mastectomy					31	22			319	215	0				369	363	NO	Taxol			96DE7106-568A-4CD9-A274-E240A6EC4CE0
TCGA-C8-A12Z-01A					45	Right		Axillary lymph node dissection alone		85.85.0	Nationwide Children's Hospital	TCGA-C8-A12Z-D70813	302C0CC5-6BC8-4CEF-8936-0BE869DB8E4C	TCGA-C8-A12Z-F70810	CFB88891-DA2A-4058-B2A7-44A8A2E2AFDE			Negative	Negative					Negative	Other					31	9			107	102	0						NO	Cyclophosphamide			B4020628-8861-44DF-ABAE-B45D300008D0
TCGA-BH-A0HL-01A					56	Right		Sentinel lymph node biopsy plus axillary dissection		56.90.0	Nationwide Children's Hospital	TCGA-BH-A0HL-D4775	FE6D45BC-6826-4206-A202-F4B08A55B85B	TCGA-BH-A0HL-F4792	AE1F5D23-CBC5-4BC8-9B75-9EC9624A5E34										Modified Radical Mastectomy				NO	31	16				492	0							ARIMIDEX			E908CA72-E156-4F76-A649-7F7A0619D426
TCGA-A2-A0EN-01A					70	Right	Primary Tumor Field	Sentinel node biopsy alone		72.90.0	Nationwide Children's Hospital	TCGA-A2-A0EN-D2543	4d55dd20-b5b7-40c3-8015-41a32a417673	TCGA-A2-A0EN-F13725	78F26CBF-3BA6-4DB3-80C7-C632F90A271B	TCGA-A2-A0EN-R2545	7820e82d-3f7c-446c-ad1a-a7f9dd967440		Positive					Positive	Lumpectomy			1	YES	31	10			1926	64	0				134	91		Tamoxifen			F694D9E4-CE81-4DB9-B109-8CA323D6388D		Scheduled Follow-up Submission
TCGA-AR-A24L-01A					26	Right	Primary Tumor Field	Sentinel lymph node biopsy plus axillary dissection		142.78.0	Nationwide Children's Hospital	TCGA-AR-A24L-D31269	F4B58638-1544-44FA-9E05-9CA0F74B8232	TCGA-AR-A24L-F49488	98A5DD07-6036-40E1-AE50-9958B67DE1EF	TCGA-AR-A24L-R31268	FA585658-1B63-499E-B19C-2E464838C89F		Positive					Positive	Other			1		31	2					0			1414	275	243		Doxorubicin		10-19%	4A0C5242-10FF-47AF-8E36-9F614B65EFC6		Scheduled Follow-up Submission
TCGA-A2-A0YD-01A					63	Left Upper Outer Quadrant		Sentinel node biopsy alone		74.87.0	Nationwide Children's Hospital	TCGA-A2-A0YD-D5675	94197033-7886-421d-a619-88769cecaade	TCGA-A2-A0YD-F15770	D23505E4-45DA-42D1-808A-CA517E53553F				Positive					Positive	Simple Mastectomy				YES	31	30				143	0							Arimidex		90-99%	22826DA6-629A-4995-BB23-F96095306FE8		Scheduled Follow-up Submission
TCGA-E9-A22E-01A					56	Right Upper Inner Quadrant	Primary Tumor Field	Axillary lymph node dissection alone		136.76.0	Nationwide Children's Hospital	TCGA-E9-A22E-D29937	5E6E3BA5-6698-470A-AEF8-FD14C5823576	TCGA-E9-A22E-F55571	71C2365F-67A1-447E-87BF-BFFF492E00E9	TCGA-E9-A22E-R29938	96410A12-7396-491A-B9A2-EC4CD9C55310		Positive					Positive					YES	31	9			226	13	0				128	105	NO	5-Fluorouracil		10-19%	8AAC648E-86C6-4BD7-A41A-1C375FEF7D9B		Scheduled Follow-up Submission
TCGA-A8-A08H-01A					66	Left Upper Inner Quadrant				47.97.0	Nationwide Children's Hospital								Positive					Positive	Other					31	27					0										CA098890-E859-4F98-B8A3-EC51C7DC69CD
TCGA-E9-A1RB-01A					40	Left Upper Inner Quadrant		Axillary lymph node dissection alone		136.76.0	Nationwide Children's Hospital	TCGA-E9-A1RB-D30856	25429B7D-51F9-4C70-AC60-B8148B735388	TCGA-E9-A1RB-F39530	EEE00A97-63CE-4A0A-A552-0F2F2D98CCC8										Modified Radical Mastectomy				NO	31	24			107	11	0						NO	Methotrexate			C61A6D6D-F55D-4E0D-BEAA-9E179478AA68		Scheduled Follow-up Submission
TCGA-E9-A1RB-11A					40	Left Upper Inner Quadrant		Axillary lymph node dissection alone		136.76.0	Nationwide Children's Hospital	TCGA-E9-A1RB-D30856	25429B7D-51F9-4C70-AC60-B8148B735388	TCGA-E9-A1RB-F39530	EEE00A97-63CE-4A0A-A552-0F2F2D98CCC8										Modified Radical Mastectomy				NO	31	24			107	11	0						NO	Methotrexate			C61A6D6D-F55D-4E0D-BEAA-9E179478AA68		Scheduled Follow-up Submission
TCGA-AC-A3BB-01A					46	Right Upper Outer Quadrant	Primary Tumor Field	Axillary lymph node dissection alone		185.69.0	Nationwide Children's Hospital	TCGA-AC-A3BB-D58957	260FF621-0F12-4118-8D3F-AA44CC70F345	TCGA-AC-A3BB-F58953	4140D0AE-C992-47B8-BB8C-23A0F298C461	TCGA-AC-A3BB-R58954	DE55AD06-AA01-4B82-90E5-16F511E133AD		Positive					Positive	Modified Radical Mastectomy					31	29			197	92	0				261	217	NO	Taxotere		90-99%	71822698-1A36-4312-920E-36602B25EB99
TCGA-D8-A4Z1-01A					68	Right Upper Inner Quadrant		No axillary staging		271.56.0	Nationwide Children's Hospital	TCGA-D8-A4Z1-D39760	3EDA844D-C123-4BB2-8172-06DB3BAD4DD4	TCGA-D8-A4Z1-F58485	00555AC3-B1C1-4712-A6CD-9FDF98F9D2B3				Positive					Positive	Simple Mastectomy				NO	31	11				104	0							Tamoxifen		70-79%	2FD8F7C6-972C-400A-987D-E3F5E2DD6F7D
TCGA-A2-A04T-01A					62	Left Upper Inner Quadrant	Primary Tumor Field	Sentinel node biopsy alone		56.90.0	Nationwide Children's Hospital	TCGA-A2-A04T-D2759	cd18d339-0df7-42da-a74d-266504627111	TCGA-A2-A04T-F9343	94203642-8318-4406-9B37-865EB9288015	TCGA-A2-A04T-R9342	eac92060-57fb-4a09-8498-7c5e1e4b9924								Lumpectomy			1	YES	31	17			117	75	0				249	206		Cyclophosphamide			771119AA-BA4E-46EB-914E-56BFEA8E9FF3
TCGA-OL-A5D7-01A					70	Left Upper Outer Quadrant	Primary Tumor Field	Sentinel node biopsy alone		288.54.0	Nationwide Children's Hospital	TCGA-OL-A5D7-D65249	34732C91-371D-4928-9C31-6B8D6A5D76CB	TCGA-OL-A5D7-F55439	81E1B508-543A-4E66-856F-86048DFAF64A	TCGA-OL-A5D7-R65250	737BD5F1-6E92-4485-96EE-BA831B7A24C9		Negative					Negative	Lumpectomy					31	10			104	41	0				550	134		Taxotere			BCFF5E4B-E544-43C3-B44D-336768653127
TCGA-A7-A4SA-01A					40	Left Lower Outer Quadrant		Sentinel lymph node biopsy plus axillary dissection		271.56.0	Nationwide Children's Hospital	TCGA-A7-A4SA-D40425	625C328C-CA7E-445E-A8AB-B77D5CC49C4A	TCGA-A7-A4SA-F49560	8EE2B4A8-14AD-4A21-9746-83D9A7F27F14				Positive	3 Point Scale				Negative	Simple Mastectomy				YES	31	3				217	0							Tamoxifen		80-89%	6CAD6A57-3698-422E-8C22-113710186C43
TCGA-A7-A4SA-11A					40	Left Lower Outer Quadrant		Sentinel lymph node biopsy plus axillary dissection		271.56.0	Nationwide Children's Hospital	TCGA-A7-A4SA-D40425	625C328C-CA7E-445E-A8AB-B77D5CC49C4A	TCGA-A7-A4SA-F49560	8EE2B4A8-14AD-4A21-9746-83D9A7F27F14				Positive	3 Point Scale				Negative	Simple Mastectomy				YES	31	3				217	0							Tamoxifen		80-89%	6CAD6A57-3698-422E-8C22-113710186C43
TCGA-D8-A1XD-01A					36	Left Upper Outer Quadrant	Primary Tumor Field	Axillary lymph node dissection alone		120.76.0	Nationwide Children's Hospital			TCGA-D8-A1XD-F29440	CA295FC1-24C4-40F5-AF2F-AF0B56CE9B37	TCGA-D8-A1XD-R29441	EFC43768-3277-4FD5-8328-112033D69DF4		Positive					Positive	Modified Radical Mastectomy				NO	31	19					0				138	109	NO		% IHC		E4505132-18F9-424E-93F0-424F6034E613		Scheduled Follow-up Submission
TCGA-B6-A0I6-01A	NO	NO	NO		49	Left		Axillary lymph node dissection alone		56.90.0	Nationwide Children's Hospital			TCGA-B6-A0I6-F12605	DCA585A3-16B1-4A99-9C5A-AEB6183E3C9E				Negative					Negative	Modified Radical Mastectomy				NO	31	1					0			859							C97E0E43-6FE7-44BC-8B4E-5ADF3A92F8F6		Scheduled Follow-up Submission
TCGA-A2-A0CU-01A					73	Right Lower Outer Quadrant		Sentinel node biopsy alone		56.90.0	Nationwide Children's Hospital	TCGA-A2-A0CU-D1971	a4307c98-baf1-4f65-b40b-87bb611d8a4a	TCGA-A2-A0CU-F13735	99B03F76-5B6B-4C3C-899F-D63D8FC39C5D				Positive					Positive	Simple Mastectomy				YES	31	10				98	0							Tamoxifen		90-99%	1D1779FF-B516-4E9C-8E6D-13149AAB856D		Scheduled Follow-up Submission
TCGA-E2-A153-01A					51	Left	Regional site	Sentinel lymph node biopsy plus axillary dissection		93.85.0	Nationwide Children's Hospital	TCGA-E2-A153-D18948	057F6C50-9E43-4775-9A1A-00A06EB7F9B4	TCGA-E2-A153-F18945	3D500678-49CD-4335-9A43-AC504DE9E2B6	TCGA-E2-A153-R18955	09529206-8504-42D1-A155-E1C6D5539359		Positive					Positive	Modified Radical Mastectomy			1	NO	31	8			98	42	0				294	237	NO	doxorubicin			E8EF934F-DE4D-4036-8F8B-781D83ACC880		Scheduled Follow-up Submission
TCGA-E2-A153-11A					51	Left	Regional site	Sentinel lymph node biopsy plus axillary dissection		93.85.0	Nationwide Children's Hospital	TCGA-E2-A153-D18948	057F6C50-9E43-4775-9A1A-00A06EB7F9B4	TCGA-E2-A153-F18945	3D500678-49CD-4335-9A43-AC504DE9E2B6	TCGA-E2-A153-R18955	09529206-8504-42D1-A155-E1C6D5539359		Positive					Positive	Modified Radical Mastectomy			1	NO	31	8			98	42	0				294	237	NO	doxorubicin			E8EF934F-DE4D-4036-8F8B-781D83ACC880		Scheduled Follow-up Submission
TCGA-AO-A0JE-01A					53	Right	Primary Tumor Field	Sentinel lymph node biopsy plus axillary dissection		61.88.0	Nationwide Children's Hospital	TCGA-AO-A0JE-D3200	50d69645-1eb9-4fa7-83c0-f6614085a07f	TCGA-AO-A0JE-F15488	975B8C53-2E18-4DBB-9A34-2DCCA4680406	TCGA-AO-A0JE-R3198	a51218ad-d05c-4f75-9d0b-4a9a4bd51689								Lumpectomy			1	NO	31	22			105	63	0				243	202		DOXORUBICIN			BF4FA818-C57E-4ED9-A3EB-77FD4D8D7A80		Scheduled Follow-up Submission
TCGA-D8-A27G-01A					75	Left Lower Outer Quadrant		Axillary lymph node dissection alone		147.75.0	Nationwide Children's Hospital			TCGA-D8-A27G-F29519	370A2AC1-5396-4903-BD8B-07F1F32B4725				Positive					Positive	Modified Radical Mastectomy				NO	31	21					0						NO		manual counting		BA41A318-AB2A-422C-9D3F-60645C813AFC		Scheduled Follow-up Submission
TCGA-AO-A126-01A	NO	YES	YES	NO	39	Right	Local Recurrence	Sentinel node biopsy alone		80.83.0	Nationwide Children's Hospital	TCGA-AO-A126-D5941	9948fc14-eaff-4311-a8e0-5c0941e2316c	TCGA-AO-A126-F19402	07D7BA23-00A6-491E-A381-1B93BB686C33	TCGA-AO-A126-R5877	a3a403cf-f4f1-46ae-a7b9-d614b4e1266c		Positive		2+			Positive	Simple Mastectomy			1	YES	31	12	295	295	1639	323	0			267	421	384		Zoladex		20-29%	4ABAF04B-1274-4DC1-A4B1-1102F5CDEC1D	49	Scheduled Follow-up Submission
TCGA-A8-A08B-01A					52	Right Upper Inner Quadrant	Primary Tumor Field			47.97.0	Nationwide Children's Hospital	TCGA-A8-A08B-D37824	D84A4E44-43BA-4E63-8B8E-8CA529809BC3	TCGA-A8-A08B-F40841	B37E2409-548D-421A-A840-34803C923738	TCGA-A8-A08B-R38171	05C8AF27-7A23-4CF3-8294-437ABD8EE4C1		Positive					Negative	Other		n/a			31	2				914	0				184	122		Letrozole			E484C21A-F9DD-4C96-9C45-DA2C704B121B
TCGA-AO-A0JC-01A					64	Right	Regional site	Sentinel lymph node biopsy plus axillary dissection		61.88.0	Nationwide Children's Hospital	TCGA-AO-A0JC-D3181	04fadaa5-10b7-4b05-be8a-2f5ad9ea89b6	TCGA-AO-A0JC-F15486	A1E5BE94-918A-4E6B-97DC-9C8BE85726A8	TCGA-AO-A0JC-R3180	541d6c3c-3efe-4473-9818-68bb9f9a9693								Modified Radical Mastectomy			1	YES	31	22			221	70	0				298	252		METHOTREXATE			FEC9EBCE-C31E-49F5-B2D7-0C364506E47E		Scheduled Follow-up Submission
TCGA-AC-A2QH-01A					58	Right Upper Outer Quadrant	Primary Tumor Field	Axillary lymph node dissection alone		177.73.0	Nationwide Children's Hospital	TCGA-AC-A2QH-D64104	CFAD5F9E-8CC3-430E-A4BC-F6079D09BC84	TCGA-AC-A2QH-F64100	91E76EF9-3B27-4249-8F36-04C648DEAA31	TCGA-AC-A2QH-R64101	731DA497-5254-41D5-A65B-F5F0222CE5A1		Negative					Negative	Modified Radical Mastectomy				YES	31	26			208	94	0				305	246	NO	Aloxi			15210A77-4B3D-4301-8234-7A22BF75F7F3
TCGA-AC-A2QH-01B					58	Right Upper Outer Quadrant	Primary Tumor Field	Axillary lymph node dissection alone		177.73.0	Nationwide Children's Hospital	TCGA-AC-A2QH-D64104	CFAD5F9E-8CC3-430E-A4BC-F6079D09BC84	TCGA-AC-A2QH-F64100	91E76EF9-3B27-4249-8F36-04C648DEAA31	TCGA-AC-A2QH-R64101	731DA497-5254-41D5-A65B-F5F0222CE5A1		Negative					Negative	Modified Radical Mastectomy				YES	31	26			208	94	0				305	246	NO	Aloxi			15210A77-4B3D-4301-8234-7A22BF75F7F3
TCGA-E2-A14N-01A					37	Right Upper Inner Quadrant	Regional site	Sentinel lymph node biopsy plus axillary dissection		103.78.0	Nationwide Children's Hospital	TCGA-E2-A14N-D19181	17CBAB16-10F1-4630-8C6E-81E28038C433	TCGA-E2-A14N-F19154	374DA424-B865-46D4-A433-F702C840CF36	TCGA-E2-A14N-R19182	7722E80A-C0A5-4B7D-95C4-6BBF762D55DD		Negative					Negative	Simple Mastectomy			1	NO	31	17			148	87	0				236	181	NO	Docetaxel	Allred score 0+0 = 0		FE8A9AFC-79BE-4302-A31D-237E2BE37DEF		Scheduled Follow-up Submission
TCGA-A7-A3J1-01A					63	Left	Primary Tumor Field	Sentinel lymph node biopsy plus axillary dissection		202.69.0	Nationwide Children's Hospital	TCGA-A7-A3J1-D36755	14B7B938-1FD8-4DE7-8846-C4F32A49A5DE	TCGA-A7-A3J1-F36693	B21A2460-AFDC-43FE-A22E-A2DDF374A03D	TCGA-A7-A3J1-R36695	2476582A-72E1-4F42-86D0-721640EC49D6		Positive					Positive	Lumpectomy					31	12				300	0				134	89	NO	Aromasin		90-99%	BC8CD926-7316-4744-A4A8-B78A6E6CE231
TCGA-BH-A204-01A					80	Left				136.76.0	Nationwide Children's Hospital														Modified Radical Mastectomy					31	8					0										E75ADCC0-D58A-4801-AACF-197AF8726BC8
TCGA-BH-A204-11A					80	Left				136.76.0	Nationwide Children's Hospital														Modified Radical Mastectomy					31	8					0										E75ADCC0-D58A-4801-AACF-197AF8726BC8
TCGA-D8-A140-01A					62	Left		Axillary lymph node dissection alone		85.85.0	Nationwide Children's Hospital	TCGA-D8-A140-D13809	CD6D1C59-F2A8-4AC6-9E8B-74835E6187BD	TCGA-D8-A140-F13808	39F74CEF-2C48-4800-B82A-92DCBA81257C				Positive					Positive	Modified Radical Mastectomy				NO	31	20			181	27	0							doxorubicin+cyclophosphamid	manual counting		B2CC293C-26DB-4B7C-BA3B-FEED06F1678D		Scheduled Follow-up Submission
TCGA-A8-A091-01A					61	Right	Primary Tumor Field			47.97.0	Nationwide Children's Hospital	TCGA-A8-A091-D37754	72915C6D-EEBE-4670-ABF0-E15D34050969	TCGA-A8-A091-F40557	5C002AE2-4733-487B-8827-5B108727F910	TCGA-A8-A091-R38154	B6AFE9FC-6769-4F5A-B728-625645B39410		Positive					Negative	Other		n/a			31	23			669	580	0			243	184	123		Pamidronate			376D2CA8-19E4-454C-8B68-A86956CA7729
TCGA-E9-A3HO-01A					49	Left Upper Outer Quadrant		Axillary lymph node dissection alone		202.69.0	Nationwide Children's Hospital	TCGA-E9-A3HO-D40291	FC15DB60-9371-4C3A-8C2C-34D254C7B264	TCGA-E9-A3HO-F40289	2F7EA195-DA67-4B9A-B5E2-F2E1E7723756										Modified Radical Mastectomy				NO	31	15			64	61	0						NO	Zoladex			3E2ACF42-AE94-43D5-8390-BE2781B44DAF		Scheduled Follow-up Submission
TCGA-E2-A15K-01A					58	Right Upper Outer Quadrant	Regional site	Axillary lymph node dissection alone		96.78.0	Nationwide Children's Hospital	TCGA-E2-A15K-D18871	9C486924-7EF1-47D8-B98A-2676AE270FE8	TCGA-E2-A15K-F18869	0C192618-60F0-4ED8-B0BA-0873916821EE	TCGA-E2-A15K-R18879	597CFDF4-47EE-4CFD-8D2B-66BD1D75DE2B		Positive					Positive	Lumpectomy			1	NO	31	15			131	61	0				273	232	NO	Adriamycin	Allred score 5+3 = 8		5F63CDF1-DE00-4876-9D1C-3D58724E95DA		Scheduled Follow-up Submission
TCGA-E2-A15K-06A					58	Right Upper Outer Quadrant	Regional site	Axillary lymph node dissection alone		96.78.0	Nationwide Children's Hospital	TCGA-E2-A15K-D18871	9C486924-7EF1-47D8-B98A-2676AE270FE8	TCGA-E2-A15K-F18869	0C192618-60F0-4ED8-B0BA-0873916821EE	TCGA-E2-A15K-R18879	597CFDF4-47EE-4CFD-8D2B-66BD1D75DE2B		Positive					Positive	Lumpectomy			1	NO	31	15			131	61	0				273	232	NO	Adriamycin	Allred score 5+3 = 8		5F63CDF1-DE00-4876-9D1C-3D58724E95DA		Scheduled Follow-up Submission
TCGA-E2-A15K-11A					58	Right Upper Outer Quadrant	Regional site	Axillary lymph node dissection alone		96.78.0	Nationwide Children's Hospital	TCGA-E2-A15K-D18871	9C486924-7EF1-47D8-B98A-2676AE270FE8	TCGA-E2-A15K-F18869	0C192618-60F0-4ED8-B0BA-0873916821EE	TCGA-E2-A15K-R18879	597CFDF4-47EE-4CFD-8D2B-66BD1D75DE2B		Positive					Positive	Lumpectomy			1	NO	31	15			131	61	0				273	232	NO	Adriamycin	Allred score 5+3 = 8		5F63CDF1-DE00-4876-9D1C-3D58724E95DA		Scheduled Follow-up Submission
TCGA-A7-A13H-01A	NO	NO			61	Right		Sentinel lymph node biopsy plus axillary dissection		227.60.0	Nationwide Children's Hospital	TCGA-A7-A13H-D36144	5204919F-EBC8-4F13-A5D7-E1135D397732	TCGA-A7-A13H-F36143	7C078E97-824D-4A33-90D1-8E5589C7AFA3				Positive					Positive	Simple Mastectomy				YES	31	19				78	0		840	795			NO	Anastrozole		80-89%	C143DE8F-CC6E-426D-8D40-87A5F4FCE55A	2.7
TCGA-B6-A1KN-01A					57	Right Upper Inner Quadrant		Axillary lymph node dissection alone		109.88.0	Nationwide Children's Hospital			TCGA-B6-A1KN-F15738	9C9ED6D8-B891-45C3-AFFC-98008F6956BB				Negative					Negative	Modified Radical Mastectomy				NO	31	29					0						NO				327E8500-E6CB-436B-8538-B5AEF0D142AA		Scheduled Follow-up Submission
TCGA-S3-AA14-01A					47	Right	Primary Tumor Field	Sentinel node biopsy alone		379.34.0	Nationwide Children's Hospital	TCGA-S3-AA14-D58564	B5D44FCB-607E-4DB0-9F91-FC2787B93697	TCGA-S3-AA14-F67622	49A0491B-CE59-4BDF-98C3-5394E5691C3E	TCGA-S3-AA14-R58557	FF05CFAD-F5C8-4C9F-9FA9-E785F6EFDDA9		Positive	3 Point Scale	3+	3 Point Scale		Positive	Other				YES	31	7				118	0				267	221		TAXOL	CAP SCORING GUIDELINE 2010	70-79%	BD84764D-4E37-4914-A4B6-9536F3C2E9CA
TCGA-E2-A1IK-01A					71	Left		Sentinel node biopsy alone		117.78.0	Nationwide Children's Hospital	TCGA-E2-A1IK-D19977	11888A89-B610-43B7-9103-C695EDAB9332	TCGA-E2-A1IK-F70395	C706AB33-CD90-495B-AD28-271551DB85A8				Positive					Positive	Lumpectomy				NO	31	17				92	0						NO	Arimidex			15B70E9F-43A1-418F-9389-FED4C3997E52		Scheduled Follow-up Submission
TCGA-BH-A0E2-01A					49	Right		Axillary lymph node dissection alone		61.88.0	Nationwide Children's Hospital	TCGA-BH-A0E2-D4637	DBDA746D-4CC8-48BC-B2DA-84801984F92A	TCGA-BH-A0E2-F4639	DD8C6D58-8E0A-47A6-BEB4-FA08BBC73CF3										Modified Radical Mastectomy				NO	31	16			221	172	0							PACLITAXEL			DEE2BC9E-33EB-4E90-81C7-2F3FD88C0EF8
TCGA-D8-A73W-01A	NO	YES			79	Right Upper Outer Quadrant	Distant site	Axillary lymph node dissection alone		360.42.0	Nationwide Children's Hospital	TCGA-D8-A73W-D72199	A09294E3-9DBD-4A35-B806-8C3B050532A1	TCGA-D8-A73W-F57875	139213E3-53E1-401C-ADFB-412395451F9A	TCGA-D8-A73W-R72198	09B56850-CF72-433D-B179-43E43E8213F8		Positive					Negative	Simple Mastectomy				NO	31	28			-620	-709	0			21	-652	-652		Tamoxifen		70-79%	29B26DBB-E612-4F69-A849-D1E1FD9995F7
TCGA-BH-A0BJ-01A					41	Left	Primary Tumor Field	Sentinel lymph node biopsy plus axillary dissection		61.88.0	Nationwide Children's Hospital	TCGA-BH-A0BJ-D4476	50C21FE3-942E-4B85-BB19-70A6C75B85BE	TCGA-BH-A0BJ-F4480	75A342F3-7D6D-42F8-961D-523D0100ABE8	TCGA-BH-A0BJ-R4479	5F4133B4-BA40-404B-8F1E-98D266078E77								Other			1	NO	31	15			198	126	0				443	398		CYCLOPHOSPHAMIDE			90DE5486-C277-4EE7-9B08-58029586EAC6
TCGA-BH-A0BJ-11A					41	Left	Primary Tumor Field	Sentinel lymph node biopsy plus axillary dissection		61.88.0	Nationwide Children's Hospital	TCGA-BH-A0BJ-D4476	50C21FE3-942E-4B85-BB19-70A6C75B85BE	TCGA-BH-A0BJ-F4480	75A342F3-7D6D-42F8-961D-523D0100ABE8	TCGA-BH-A0BJ-R4479	5F4133B4-BA40-404B-8F1E-98D266078E77								Other			1	NO	31	15			198	126	0				443	398		CYCLOPHOSPHAMIDE			90DE5486-C277-4EE7-9B08-58029586EAC6
TCGA-A2-A3XT-01A					45	Left	Primary Tumor Field	Other (specify)	FNA plus axillary lymph node dissection	234.53.0	Nationwide Children's Hospital	TCGA-A2-A3XT-D34497	3E9B81CF-BFAD-4C78-AC24-32461C485692	TCGA-A2-A3XT-F43309	32EAD95B-751B-4BFD-BE2E-908EA3CE2617	TCGA-A2-A3XT-R34501	D6509E2C-F849-48E2-9026-A7B97686D7D7		Negative					Negative	Modified Radical Mastectomy				NO	31	16			161	97	0				282	278		Docetaxel			F7E64AE3-F3BD-455B-BEC6-0922800914E5
TCGA-AQ-A1H2-01A					84	Right Upper Outer Quadrant	Regional site	Axillary lymph node dissection alone		109.88.0	Nationwide Children's Hospital	TCGA-AQ-A1H2-D19899	C7DE7726-8978-4819-B64A-71AE48B4A1FF	TCGA-AQ-A1H2-F19896	BA3554E9-F416-4973-B66A-513126BBBB98	TCGA-AQ-A1H2-R19902	D33D7E94-096B-44C0-BFB7-7CCA8794CE55		Positive					Positive	Modified Radical Mastectomy			1	NO	31	3				378	0				243	208	NO	Arimidex		90-99%	A109F343-6747-4F2C-AD02-148FCB4D4885		Scheduled Follow-up Submission
TCGA-AR-A0TP-01A					43	Left Upper Inner Quadrant	Primary Tumor Field	Sentinel lymph node biopsy plus axillary dissection		72.90.0	Nationwide Children's Hospital	TCGA-AR-A0TP-D19026	04948347-26AC-49B0-9E46-0812A85833EB	TCGA-AR-A0TP-F49514	DF520576-B6A2-4289-AA4C-EB29F269B2D6	TCGA-AR-A0TP-R18481	B4DEB351-1554-4E4E-90E0-E4F24497D2B3		Positive					Negative	Other			1	YES	31	2			97	32	0				166	125		Doxorubicin		<10%	2913DB00-07E3-4D47-B016-F3C34C27E79D		Scheduled Follow-up Submission
TCGA-AC-A2FF-01A					40	Right	Primary Tumor Field	Sentinel lymph node biopsy plus axillary dissection		155.73.0	Nationwide Children's Hospital	TCGA-AC-A2FF-D56173	CA6E2206-6437-4F20-B4CE-07925A8A8D79	TCGA-AC-A2FF-F56166	68379DFA-59F3-4129-9B2D-D8107CD335C5	TCGA-AC-A2FF-R56168	1F8155CE-49F0-4917-AA85-4DF9FBE799B1		Positive					Positive	Lumpectomy				YES	31	29				382	0				377	336	NO	Tamoxifen		30-39%	A780E8C7-5568-477D-8562-EE139F6FC8B8
TCGA-AC-A2FF-11A					40	Right	Primary Tumor Field	Sentinel lymph node biopsy plus axillary dissection		155.73.0	Nationwide Children's Hospital	TCGA-AC-A2FF-D56173	CA6E2206-6437-4F20-B4CE-07925A8A8D79	TCGA-AC-A2FF-F56166	68379DFA-59F3-4129-9B2D-D8107CD335C5	TCGA-AC-A2FF-R56168	1F8155CE-49F0-4917-AA85-4DF9FBE799B1		Positive					Positive	Lumpectomy				YES	31	29				382	0				377	336	NO	Tamoxifen		30-39%	A780E8C7-5568-477D-8562-EE139F6FC8B8
TCGA-BH-A0E0-01A					38	Left	Primary Tumor Field	Axillary lymph node dissection alone		61.88.0	Nationwide Children's Hospital	TCGA-BH-A0E0-D4599	8EB7D1DE-E03C-401A-A845-0B5329E85271	TCGA-BH-A0E0-F4603	8EA495C0-4ADC-49A9-9235-6D360CB615E2	TCGA-BH-A0E0-R4601	7729AB44-C0F8-40F3-A012-E97C7F94CAC7								Modified Radical Mastectomy			1	NO	31	16			143	38	0				255	198		DOCETAXEL			F6A539BD-90DD-4B69-9E9A-28DEBE29C635
TCGA-BH-A0E0-11A					38	Left	Primary Tumor Field	Axillary lymph node dissection alone		61.88.0	Nationwide Children's Hospital	TCGA-BH-A0E0-D4599	8EB7D1DE-E03C-401A-A845-0B5329E85271	TCGA-BH-A0E0-F4603	8EA495C0-4ADC-49A9-9235-6D360CB615E2	TCGA-BH-A0E0-R4601	7729AB44-C0F8-40F3-A012-E97C7F94CAC7								Modified Radical Mastectomy			1	NO	31	16			143	38	0				255	198		DOCETAXEL			F6A539BD-90DD-4B69-9E9A-28DEBE29C635
TCGA-E9-A1NG-01A					62	Right Upper Outer Quadrant		Axillary lymph node dissection alone		124.80.0	Nationwide Children's Hospital	TCGA-E9-A1NG-D39777	8D15500A-996F-42AD-9B5C-4B59FBEB68D6	TCGA-E9-A1NG-F39774	B3EEEE00-5B8E-436F-80FE-7412C969BF0C				Positive					Positive					YES	31	1			786	34	0						NO	Tamoxifen			CF092574-0CA0-4BD2-9F1F-695CECDC97E3		Scheduled Follow-up Submission
TCGA-E9-A1NG-11A					62	Right Upper Outer Quadrant		Axillary lymph node dissection alone		124.80.0	Nationwide Children's Hospital	TCGA-E9-A1NG-D39777	8D15500A-996F-42AD-9B5C-4B59FBEB68D6	TCGA-E9-A1NG-F39774	B3EEEE00-5B8E-436F-80FE-7412C969BF0C				Positive					Positive					YES	31	1			786	34	0						NO	Tamoxifen			CF092574-0CA0-4BD2-9F1F-695CECDC97E3		Scheduled Follow-up Submission
TCGA-BH-A0B0-01A					56	Left Upper Outer Quadrant	Primary Tumor Field			85.85.0	Nationwide Children's Hospital	TCGA-BH-A0B0-D59206	9A3AEC18-4AD6-47E3-B8CA-EA762943F950	TCGA-BH-A0B0-F59204	8DFE37F5-C1F5-45C1-BCE9-70A5209079F1	TCGA-BH-A0B0-R59207	60C2C230-CDAF-4194-B9B2-F90127A231E7		Positive					Positive	Other					31	2			194	82	0				236	194	NO	Cytoxan			28123FC7-D811-4DF2-A537-FE3CE14959A1
TCGA-BH-A0EA-01A					72	Left				85.85.0	Nationwide Children's Hospital	TCGA-BH-A0EA-D58581	FECD8A5A-10AD-4DB7-91F2-08A6B16C19B9	TCGA-BH-A0EA-F58566	4E9DAD81-E003-4EE4-88B8-99136572258C				Positive					Positive	Other					31	14			522	363	0						NO	Cytoxan			10E229A0-C597-4F9F-82FF-1B199CAF24F3
TCGA-AR-A24K-01A					46	Left Upper Outer Quadrant	Primary Tumor Field	Sentinel lymph node biopsy plus axillary dissection		142.78.0	Nationwide Children's Hospital	TCGA-AR-A24K-D31260	3AFC8797-628E-464D-A40B-5D0B624E3B20	TCGA-AR-A24K-F49485	4D12DA3E-BE3E-4324-A4D9-7006E014CA9E	TCGA-AR-A24K-R31259	7EBD9D8A-5AA6-452F-979A-3A3CDDA5B87F		Positive					Positive	Other			1	YES	31	2					0				241	195		Doxorubicin	No value Given	10-19%	40CD5DDF-2600-4D0B-8BB8-1B0F221BC285		Scheduled Follow-up Submission
TCGA-E2-A154-01A					68	Left Upper Outer Quadrant	Primary Tumor Field	Sentinel node biopsy alone		85.85.0	Nationwide Children's Hospital	TCGA-E2-A154-D18941	A19AD7AA-E6A9-40A8-A357-65677967265C	TCGA-E2-A154-F18940	640B6B5F-8868-48C5-BB54-8BCAD1124002	TCGA-E2-A154-R18943	0161D7CC-AED1-4B99-B6DC-36967E820C26		Positive	3 Point Scale		3 Point Scale		Positive	Lumpectomy			1	NO	31	8				325	0				77	32	NO	arimidex		90-99%	DF49B6DA-888F-4726-858D-2FAD5DB4481F		Scheduled Follow-up Submission
TCGA-AC-A7VC-01A					56	Left		Sentinel node biopsy alone		360.42.0	Nationwide Children's Hospital								Negative					Negative	Simple Mastectomy				YES	31	29					0										F4B3DF38-A3FB-4943-931A-48EBCDC1285F
TCGA-BH-A0BW-01A					71	Left Lower Outer Quadrant	Primary Tumor Field			85.85.0	Nationwide Children's Hospital	TCGA-BH-A0BW-D59134	E47D5A3A-3F23-45FE-AFF6-035D2D0D84BA	TCGA-BH-A0BW-F59127	B292C3C3-6CCE-4DB3-B3E2-B262836D0F7D	TCGA-BH-A0BW-R59130	E65FC14F-8CC3-4FC3-8C54-D99CF8CB0D50		Negative					Negative	Other					31	1			114	51	0				196	187	NO	Cytoxan			4390FC8E-B534-4B26-AAAA-623E0769A0CB
TCGA-BH-A0BW-11A					71	Left Lower Outer Quadrant	Primary Tumor Field			85.85.0	Nationwide Children's Hospital	TCGA-BH-A0BW-D59134	E47D5A3A-3F23-45FE-AFF6-035D2D0D84BA	TCGA-BH-A0BW-F59127	B292C3C3-6CCE-4DB3-B3E2-B262836D0F7D	TCGA-BH-A0BW-R59130	E65FC14F-8CC3-4FC3-8C54-D99CF8CB0D50		Negative					Negative	Other					31	1			114	51	0				196	187	NO	Cytoxan			4390FC8E-B534-4B26-AAAA-623E0769A0CB
TCGA-A2-A3XS-01A	YES	NO	NO		62	Left Upper Outer Quadrant		Sentinel lymph node biopsy plus axillary dissection		234.53.0	Nationwide Children's Hospital	TCGA-A2-A3XS-D34455	0221663A-3CAA-42B8-B315-073962FBD6FF	TCGA-A2-A3XS-F34446	5BBB886F-91E0-431D-A6DC-E1BB89E95022			Negative	Negative				Mastectomy NOS	Negative	Lumpectomy				YES	31	15			1022	986	0			682			YES	Navelbine			BB997BE7-279C-41D4-810E-A8416F080DF0		Additional New Tumor Event
TCGA-HN-A2OB-01A	YES	NO			45	Right Lower Outer Quadrant	Primary Tumor Field	Sentinel node biopsy alone		288.54.0	Nationwide Children's Hospital	TCGA-HN-A2OB-D49308	ACF2B357-EB83-4198-95BC-7128DDF3B1EE	TCGA-HN-A2OB-F65011	98128139-5012-4344-8CBB-E50007749352	TCGA-HN-A2OB-R49310	708829D0-DA92-473C-8DF3-13C6B3D1054C		Positive					Positive	Simple Mastectomy				NO	31	17			210	168	0			1673	276	242		Docetaxel			8EC0674B-877A-4E49-B366-3A81894B09CE	1.7
TCGA-D8-A27M-01A					59	Left Upper Outer Quadrant		Sentinel node biopsy alone		147.75.0	Nationwide Children's Hospital	TCGA-D8-A27M-D29593	0BE1EFFF-4959-45B6-A90D-D5954D024746	TCGA-D8-A27M-F29592	F7028889-8575-484F-8C51-2F75DA0740BC				Negative					Negative	Modified Radical Mastectomy				NO	31	26			238	84	0						NO	methotrexate+5 fluorouracil+cyclophosphamide			57808FFC-740B-4CC7-BDF9-FE3C493EDC5C		Scheduled Follow-up Submission
TCGA-BH-A0EI-01A					51	Right	Primary Tumor Field			85.85.0	Nationwide Children's Hospital			TCGA-BH-A0EI-F59115	E894DC0C-AE6E-4101-A406-2A464420B984	TCGA-BH-A0EI-R59121	AAB0EEA5-BADE-4CBB-BBD8-3F0FBC725701		Positive					Positive	Other					31	1					0				350	350	NO				345F5FB3-5C55-4861-8009-59B6F546D794
TCGA-AC-A23E-01A					50	Right	Primary Tumor Field	Sentinel node biopsy alone		136.76.0	Nationwide Children's Hospital	TCGA-AC-A23E-D43238	D789C42F-8DB9-4956-B101-E5635D52C40D	TCGA-AC-A23E-F43240	6B8CD25F-D9F0-46C3-AA28-66D68A889F91	TCGA-AC-A23E-R43239	5D4AA189-74A9-4527-95E0-9CD8C7441796		Positive					Positive	Modified Radical Mastectomy					31	15				111	0				158	127	NO	Tamoxifen		30-39%	5BC94657-C5A4-4C5C-90E8-BAAADAE83050
TCGA-AR-A1AM-01A					52	Right Upper Outer Quadrant				227.60.0	Nationwide Children's Hospital	TCGA-AR-A1AM-D63948	1F367D89-FCE1-484D-B3CA-93FF5FE8F4E0	TCGA-AR-A1AM-F36898	45E8106C-259E-4F9D-9FDA-FFCDE4772117				Positive					Positive	Simple Mastectomy					31	20			97	55	0							cytoxan			0D2A2A2F-71B7-4BAC-8FD3-A17FACBE3DE3
TCGA-A2-A0EO-01A					54	Left	Primary Tumor Field	Sentinel node biopsy alone		56.90.0	Nationwide Children's Hospital	TCGA-A2-A0EO-D1995	27d60124-9f25-4998-9bd1-d10689365a73	TCGA-A2-A0EO-F13732	934A43F9-9180-48A7-BE9D-F50B3E511901	TCGA-A2-A0EO-R1992	9e36f785-838a-4b6a-a404-6cb8df45ea5a		Positive					Positive	Lumpectomy			1	YES	31	13			361	244	0				137	91		E-75			5B9CA4DA-BA79-48EA-857B-A5BF3F3FD2A8		Scheduled Follow-up Submission
TCGA-BH-A0BP-01A					76	Left Upper Outer Quadrant	Primary Tumor Field			85.85.0	Nationwide Children's Hospital			TCGA-BH-A0BP-F59122	A6C7E31C-28D6-4762-AC61-52999F2DFB05	TCGA-BH-A0BP-R59125	3F5C1BF6-607D-47CE-BCE8-FA3A3A183E79		Positive					Positive	Other					31	1					0				162	162	NO				F18EA2DD-849D-44D7-BE5C-D4CC211F3972
TCGA-B6-A0RE-01A					61	Right		Axillary lymph node dissection alone		61.88.0	Nationwide Children's Hospital			TCGA-B6-A0RE-F71507	68A0A63C-7D7B-433D-AA9F-84E7F9365EA8				Negative					Negative	Modified Radical Mastectomy				NO	31	26					0										F0FC0B95-41E5-4A2B-9E3B-772DA0DB4315		Scheduled Follow-up Submission
TCGA-A2-A0YJ-01A	NO	NO	YES		39	Left	Primary Tumor Field	Axillary lymph node dissection alone		74.87.0	Nationwide Children's Hospital	TCGA-A2-A0YJ-D5820	3d201259-de17-489f-89f8-f605fa43fe37	TCGA-A2-A0YJ-F16756	717318E8-D1B6-4D8D-8FFC-BBA23E110C17	TCGA-A2-A0YJ-R5819	99d00471-4902-455d-8eaf-2b4ee63fb7dc		Positive		0			Negative	Modified Radical Mastectomy			1	NO	31	16		559	150	46	0			559	223	180		Taxotere		<10%	83B2EF83-FAF6-4961-97F8-4A4A33D70CE4		Scheduled Follow-up Submission
TCGA-AR-A1AW-01A					65	Left Upper Inner Quadrant	Primary Tumor Field	Sentinel lymph node biopsy plus axillary dissection		96.78.0	Nationwide Children's Hospital	TCGA-AR-A1AW-D21884	E157CFB4-4E3C-419E-B051-B1574E3EFECB	TCGA-AR-A1AW-F49478	56185A8A-B29D-4B04-982B-0D3ABEE0D37E	TCGA-AR-A1AW-R21878	414051C6-7D5D-4256-86B8-C8F330A26C1B		Positive					Positive	Lumpectomy			1	YES	31	2				157	0				115	76		Anastrozole		70-79%	5EA4E773-E7D2-4410-9BBF-B228B1A96B9A		Scheduled Follow-up Submission
TCGA-AC-A2FO-01A					65	Left Upper Outer Quadrant		Other (specify)	Sentinel lymph node plus Level I and Level II lymph nodes	167.74.0	Nationwide Children's Hospital	TCGA-AC-A2FO-D43227	74E898D7-9552-4550-9764-4F924FC55872	TCGA-AC-A2FO-F43223	EF71A0D0-16AB-45A4-A42D-625AFEF971B8				Positive					Negative	Simple Mastectomy				NO	31	15				225	0						NO	Hormone, NOS		90-99%	F5F2A013-AB89-4F56-A5A2-DDB0083ABB43
TCGA-AC-A2FO-11A					65	Left Upper Outer Quadrant		Other (specify)	Sentinel lymph node plus Level I and Level II lymph nodes	167.74.0	Nationwide Children's Hospital	TCGA-AC-A2FO-D43227	74E898D7-9552-4550-9764-4F924FC55872	TCGA-AC-A2FO-F43223	EF71A0D0-16AB-45A4-A42D-625AFEF971B8				Positive					Negative	Simple Mastectomy				NO	31	15				225	0						NO	Hormone, NOS		90-99%	F5F2A013-AB89-4F56-A5A2-DDB0083ABB43
TCGA-A7-A13D-01A					46	Right Upper Outer Quadrant	Primary Tumor Field	Sentinel node biopsy alone		96.78.0	Nationwide Children's Hospital	TCGA-A7-A13D-D8216	c345ebac-a9ee-49bc-b310-9629cee33830	TCGA-A7-A13D-F39794	6E464627-70AF-44BE-8CCD-1AA8D584B152	TCGA-A7-A13D-R8218	558c4f55-6729-4f9a-817b-ae35c1c3b2e2	Negative					Lumpectomy		Lumpectomy			1	NO	31	1			155	71	0				237	188		Cytoxan			6B36B0C1-D603-4D0A-B14A-15A7C79599AC
TCGA-A7-A13D-01B					46	Right Upper Outer Quadrant	Primary Tumor Field	Sentinel node biopsy alone		96.78.0	Nationwide Children's Hospital	TCGA-A7-A13D-D8216	c345ebac-a9ee-49bc-b310-9629cee33830	TCGA-A7-A13D-F39794	6E464627-70AF-44BE-8CCD-1AA8D584B152	TCGA-A7-A13D-R8218	558c4f55-6729-4f9a-817b-ae35c1c3b2e2	Negative					Lumpectomy		Lumpectomy			1	NO	31	1			155	71	0				237	188		Cytoxan			6B36B0C1-D603-4D0A-B14A-15A7C79599AC
TCGA-PE-A5DE-01A					41	Left	Primary Tumor Field			288.54.0	Nationwide Children's Hospital	TCGA-PE-A5DE-D66370	444F6B72-2D26-488F-AE79-26A7C0CEA076	TCGA-PE-A5DE-F66373	18DA1661-A5A3-419D-B7FA-A5B9C32431B1	TCGA-PE-A5DE-R66372	8C0689B9-FFAA-4060-86D2-7CEFD920316E		Positive					Positive	Other					31	13				182	0				167	124		Tamoxifen			318EA087-13B1-497B-AB75-03CC0A057351
TCGA-B6-A0RI-01A	YES	YES	YES		44	Right		Axillary lymph node dissection alone		61.88.0	Nationwide Children's Hospital			TCGA-B6-A0RI-F13795	654D049A-8513-4069-B954-CF23980C432E				Positive					Positive	Modified Radical Mastectomy				NO	31	12		1100			0			1100					IHC		D426ADBA-3AFD-46A1-9FEB-001D8FC90058		Scheduled Follow-up Submission
TCGA-B6-A0RL-01A					60	Left		Axillary lymph node dissection alone		72.90.0	Nationwide Children's Hospital			TCGA-B6-A0RL-F13796	B2545806-EF62-435D-8C96-4BE1AFC4178E				Positive					Positive	Modified Radical Mastectomy				NO	31	12					0								Image Analysis		0DC3A2DB-0F42-479D-9FBA-9D9487152A3F		Scheduled Follow-up Submission
TCGA-A8-A08A-01A					89	Left Upper Inner Quadrant				47.97.0	Nationwide Children's Hospital								Positive					Positive	Other					31	27					0										4813A9DC-1832-4720-88D0-10DAFBE302E5
TCGA-A8-A097-01A					65	Left	Primary Tumor Field			56.90.0	Nationwide Children's Hospital	TCGA-A8-A097-D37810	ED10C356-D8E5-44B6-A777-8AF1E49CDD49	TCGA-A8-A097-F40553	E01ADA75-EA29-473E-8F48-7E4B21F2D04C	TCGA-A8-A097-R38168	ECEF383E-6DE5-4F26-A795-39412649FDC7		Positive					Positive	Other		n/a			31	23				31	0				184	153		Tamoxifen			A2527BF9-937C-4283-9991-C5A88A99C9C4
TCGA-B6-A0IA-01A					51	Right		Axillary lymph node dissection alone		56.90.0	Nationwide Children's Hospital			TCGA-B6-A0IA-F71513	0F55E065-C77C-4851-8F2E-1E223AF5CE7C				Positive					Positive	Other				NO	31	26					0								IHC		5F50F97F-20EE-4FEA-8B63-1B25D4882FC0		Scheduled Follow-up Submission
TCGA-AN-A0FL-01A					62	Left Upper Inner Quadrant		Axillary lymph node dissection alone		56.90.0	Nationwide Children's Hospital			TCGA-AN-A0FL-F68952	240E4926-540A-4B61-A6CE-1A9793228A2B				Negative		1+			Negative	Modified Radical Mastectomy				NO	31	23					0								dextran coated charcoal	<10%	D6383844-65FF-41BD-B7DF-F619F91FDF67
TCGA-BH-A1FE-01A					31	Left				109.88.0	Nationwide Children's Hospital								Positive					Positive	Modified Radical Mastectomy					31	8					0										C0C1A665-4107-4812-808B-BEE62F30159B
TCGA-BH-A1FE-06A					31	Left				109.88.0	Nationwide Children's Hospital								Positive					Positive	Modified Radical Mastectomy					31	8					0										C0C1A665-4107-4812-808B-BEE62F30159B
TCGA-BH-A1FE-11B					31	Left				109.88.0	Nationwide Children's Hospital								Positive					Positive	Modified Radical Mastectomy					31	8					0										C0C1A665-4107-4812-808B-BEE62F30159B
TCGA-EW-A1PF-01A					50	Right Upper Outer Quadrant		Other (specify)	sentinel + 2 non-sentinel LN	117.78.0	Nationwide Children's Hospital	TCGA-EW-A1PF-D30301	04D4281E-70C8-4C99-9286-AE02449AB775	TCGA-EW-A1PF-F29109	9341ABC2-15C0-4C5D-B764-BB4F2E925C0F				Positive	3 Point Scale	3+	3 Point Scale		Positive	Other				YES	31	8			188	125	0						NO	Cyclophosphamide		90-99%	EA578F39-29C5-4B06-8F81-3B2BDEC1A548		Scheduled Follow-up Submission
TCGA-A7-A0DA-01A					62	Left Lower Outer Quadrant	Primary Tumor Field	Sentinel lymph node biopsy plus axillary dissection		85.85.0	Nationwide Children's Hospital	TCGA-A7-A0DA-D6125	84e6d642-6da6-4216-a376-2077ac969442	TCGA-A7-A0DA-F38487	492F04DA-FBF7-48D8-99A9-9F4490E79F21	TCGA-A7-A0DA-R5953	43ddf4b7-e2e9-4629-9fbc-01598b2cb8aa								Lumpectomy			1		31	14			107	65	0				274	226		Cytoxan			06D5DF5C-1E14-41F3-9012-D94CBCC409C8
TCGA-BH-A1EY-01A					79	Left Upper Outer Quadrant				109.88.0	Nationwide Children's Hospital			TCGA-BH-A1EY-F59173	4AD593DC-BD2C-44D2-A851-A2B13659DB85				Positive					Positive	Modified Radical Mastectomy					31	2					0			396							9BB7C4C5-3E3E-4E77-8167-9DC002501395
TCGA-BH-A1EY-11B					79	Left Upper Outer Quadrant				109.88.0	Nationwide Children's Hospital			TCGA-BH-A1EY-F59173	4AD593DC-BD2C-44D2-A851-A2B13659DB85				Positive					Positive	Modified Radical Mastectomy					31	2					0			396							9BB7C4C5-3E3E-4E77-8167-9DC002501395
TCGA-AO-A0JL-01A					59	Left	Regional site	Axillary lymph node dissection alone		61.88.0	Nationwide Children's Hospital	TCGA-AO-A0JL-D3223	b9f318a5-5322-4ead-a810-926101586b5e	TCGA-AO-A0JL-F15495	2DA970A3-1C67-4AE5-BAC4-13FDE30BD4D0	TCGA-AO-A0JL-R3221	d709ea17-69fa-422f-ad04-a50953144eb1								Modified Radical Mastectomy			1	NO	31	22			122	80	0				240	192		CYCLOPHOSPHAMIDE			24613659-E4AE-4935-9781-1561DA9E29C3		Scheduled Follow-up Submission
TCGA-D8-A3Z5-01A					54	Right		Other (specify)	mastectomy with TLND	255.56.0	Nationwide Children's Hospital			TCGA-D8-A3Z5-F57869	FBAE89FD-F5B0-4393-928B-00C4DAD6776E				Positive					Positive	Simple Mastectomy				NO	31	28					0						NO				A1B58BE5-E081-4CC3-8530-3046653D5CDE
TCGA-A8-A08X-01A					43	Left	Primary Tumor Field			47.97.0	Nationwide Children's Hospital	TCGA-A8-A08X-D37792	2DA191F1-8A7A-4538-A7E6-BD7F8ECA8A15	TCGA-A8-A08X-F40558	84AE03E2-883C-4C00-840D-ACBADE8ECEE0	TCGA-A8-A08X-R38163	6525F080-30D7-4E01-A26D-B5D03967F204		Negative					Negative	Other		n/a			31	24				366	0			366	182	153		Tamoxifen			C5ADE9E6-801B-456D-ADB6-CB6E2807E059
TCGA-B6-A0IM-01A					75	Right		Axillary lymph node dissection alone		56.90.0	Nationwide Children's Hospital			TCGA-B6-A0IM-F12623	2BD40A19-71A1-4898-94DA-8EFD7FC2F2A2			Negative	Positive				Modified radical mastectomy	Positive	Lumpectomy				NO	31	2					0								Image Analysis		7E8936A4-E161-4ED0-8F89-571A764BFE4B		Scheduled Follow-up Submission
TCGA-PL-A8LZ-01A					29	Left Upper Outer Quadrant				372.39.0	Nationwide Children's Hospital	TCGA-PL-A8LZ-D60805	B7CC5531-DE12-4FCF-A668-AD54FDDCB143	TCGA-PL-A8LZ-F64850	7245952D-7C0E-4FF3-BAD0-8A21D5524A97															31	15			48	4	0							paclitaxel			8429854B-B1A8-4960-9781-0D961ECEAABB
TCGA-A7-A56D-01A					84	Left Lower Inner Quadrant		Sentinel lymph node biopsy plus axillary dissection		288.54.0	Nationwide Children's Hospital	TCGA-A7-A56D-D41835	80BF0AFC-29C9-4B5B-A9E4-95F4B5A4EEDC	TCGA-A7-A56D-F50426	EEF11DEE-7878-4235-9B8C-E0F6B2BCE27A				Positive	3 Point Scale	1+	3 Point Scale		Positive	Lumpectomy				YES	31	23				157	0							Arimidex		90-99%	F8E9F13A-4C83-408F-ADE9-41FD1E14DE68
TCGA-A7-A56D-11A					84	Left Lower Inner Quadrant		Sentinel lymph node biopsy plus axillary dissection		288.54.0	Nationwide Children's Hospital	TCGA-A7-A56D-D41835	80BF0AFC-29C9-4B5B-A9E4-95F4B5A4EEDC	TCGA-A7-A56D-F50426	EEF11DEE-7878-4235-9B8C-E0F6B2BCE27A				Positive	3 Point Scale	1+	3 Point Scale		Positive	Lumpectomy				YES	31	23				157	0							Arimidex		90-99%	F8E9F13A-4C83-408F-ADE9-41FD1E14DE68
TCGA-A2-A0EQ-01A					64	Left	Primary Tumor Field	Other (specify)	Sentinel lymph node and non-sentinel lymph node biopsy	56.90.0	Nationwide Children's Hospital	TCGA-A2-A0EQ-D1958	5dc02798-980f-40ea-b086-988e10bfba6d	TCGA-A2-A0EQ-F13720	0D4DC400-90B0-4475-AECB-5547B6CA8BFF	TCGA-A2-A0EQ-R1959	ea9bcf48-3312-4c01-a03d-8628ec8b301d	Negative	Negative		0		Lumpectomy	Negative	Lumpectomy			1	YES	31	13			796	679	0				251	203		AE-37		<10%	F7885452-9BAE-4CDC-AB78-3778CA91755C		Scheduled Follow-up Submission
TCGA-AR-A1AQ-01A					49	Right Upper Outer Quadrant	Primary Tumor Field	Sentinel lymph node biopsy plus axillary dissection		96.78.0	Nationwide Children's Hospital	TCGA-AR-A1AQ-D21811	FB4C564B-3B93-4B6F-98A5-FDCE6A415267	TCGA-AR-A1AQ-F69276	A25BE870-3A72-431A-A4A5-2B9C5FDAD5BA	TCGA-AR-A1AQ-R21804	3579DB65-F66D-41A4-B13A-E32DD54BEBDF		Negative					Negative	Other			1	YES	31	31			88	88	0				163	121		Paclitaxel			CB4C51D6-23A8-427F-81A5-A84FE87783F8		Scheduled Follow-up Submission
TCGA-AR-A1AI-01A					47	Left Upper Outer Quadrant		Sentinel lymph node biopsy plus axillary dissection		96.78.0	Nationwide Children's Hospital	TCGA-AR-A1AI-D22167	2B5F671F-53D9-4796-B9B5-CF32551C4232	TCGA-AR-A1AI-F69268	133635BC-06CC-4DDD-A045-698C61BEB38C				Negative					Negative	Simple Mastectomy				YES	31	31			134	91	0							Paclitaxel			78644038-1109-4BB0-8AD7-4D8F9B105C43		Scheduled Follow-up Submission
TCGA-BH-A0AU-01A					45	Left Upper Inner Quadrant				96.78.0	Nationwide Children's Hospital			TCGA-BH-A0AU-F60769	A74198DE-7ECF-4CBE-A42F-C8BB8ACFD761	TCGA-BH-A0AU-R60783	1F29756B-02AC-49AA-BE44-BC4EDCEFBD8E		Positive					Positive	Other					31	16					0					65	NO				9F0F2417-D6D8-45AE-A725-1441724FAA34
TCGA-BH-A0AU-11A					45	Left Upper Inner Quadrant				96.78.0	Nationwide Children's Hospital			TCGA-BH-A0AU-F60769	A74198DE-7ECF-4CBE-A42F-C8BB8ACFD761	TCGA-BH-A0AU-R60783	1F29756B-02AC-49AA-BE44-BC4EDCEFBD8E		Positive					Positive	Other					31	16					0					65	NO				9F0F2417-D6D8-45AE-A725-1441724FAA34
TCGA-AC-A2B8-01A	NO	YES			84	Right	Primary Tumor Field	Axillary lymph node dissection alone		155.73.0	Nationwide Children's Hospital	TCGA-AC-A2B8-D43213	FE83C33F-CAF2-4C0F-8447-2905F8864C89	TCGA-AC-A2B8-F43210	E01D57EB-5162-4BCE-8AC8-D37DDBE74B3C	TCGA-AC-A2B8-R43215	DAB5FC3E-2668-4D3F-B2AD-9411CCACBF9C		Positive					Positive	Simple Mastectomy					31	15					0		672	654	122	80	NO	Arimidex		90-99%	3B1D4CD1-F81B-439A-8F45-C78844AE5E08
TCGA-AR-A2LM-01A					49	Right		Sentinel lymph node biopsy plus axillary dissection		167.74.0	Nationwide Children's Hospital	TCGA-AR-A2LM-D37346	F4D3BD0B-BC50-4E1A-A781-07B6C2A53B31	TCGA-AR-A2LM-F37336	D6D5F194-B9A7-44DB-B31C-AB8AF2E8F81B				Positive					Positive	Simple Mastectomy				YES	31	6			967	170	0						NO	Tamoxifen		70-79%	E40CD5DA-3DF7-4143-B541-1E14B0DC944E
TCGA-AC-A3QQ-01A					54	Right		Sentinel node biopsy alone		227.60.0	Nationwide Children's Hospital			TCGA-AC-A3QQ-F66024	FC62B467-765C-4836-B773-C315DE7A3049				Positive	3 Point Scale	3+	3 Point Scale		Positive	Other				YES	31	1					0									90-99%	50EC9958-C36E-4C5A-817C-10D3D1E72323
TCGA-AC-A3QQ-01B					54	Right		Sentinel node biopsy alone		227.60.0	Nationwide Children's Hospital			TCGA-AC-A3QQ-F66024	FC62B467-765C-4836-B773-C315DE7A3049				Positive	3 Point Scale	3+	3 Point Scale		Positive	Other				YES	31	1					0									90-99%	50EC9958-C36E-4C5A-817C-10D3D1E72323
TCGA-AN-A0AL-01A					41	Left Lower Outer Quadrant		Axillary lymph node dissection alone		47.97.0	Nationwide Children's Hospital			TCGA-AN-A0AL-F68944	02C99963-3C0B-4888-BD6F-F1C920E08720				Negative		0			Negative	Modified Radical Mastectomy				NO	31	23					0								dextran coated charcoal	<10%	1F89298E-AF15-4CED-9771-F5D04498D3E5
TCGA-C8-A26X-01A					58	Right Upper Outer Quadrant				147.75.0	Nationwide Children's Hospital	TCGA-C8-A26X-D70795	69033C6A-572E-4B72-BB72-027C7F663381	TCGA-C8-A26X-F70792	521990DD-93CE-4A11-ABED-112046F3A659				Negative					Negative	Modified Radical Mastectomy					31	9			207	200	0							Doxorubicin			649ECAE1-9DDF-43F7-9055-B0E206F89CD7
TCGA-A2-A0CX-01A					52	Left		Sentinel node biopsy alone		47.97.0	Nationwide Children's Hospital	TCGA-A2-A0CX-D1965	f31ba050-8c08-4914-b20d-75d85501bb13	TCGA-A2-A0CX-F13721	2A0B12FB-64F9-49DF-ACC6-22D1110B827C	TCGA-A2-A0CX-R1969	69e31ee3-a4ba-40bf-b722-f1a229006582		Positive					Negative	Lumpectomy			1	YES	31	10			367	162	0				305			Herceptin			2BCC1A7B-B4C1-4B52-99EF-8AA311FE9E02		Scheduled Follow-up Submission
TCGA-A2-A4S0-01A					77	Right Upper Outer Quadrant		Sentinel node biopsy alone		271.56.0	Nationwide Children's Hospital			TCGA-A2-A4S0-F59120	CE1841D4-C855-440F-8BAD-E62CF9EE60A7				Positive	3 Point Scale	2+	3 Point Scale		Positive	Simple Mastectomy				YES	31	1					0									90-99%	B63D473A-B430-4D31-8563-F4170B9386B9
TCGA-AN-A0AK-01A					76	Left Upper Outer Quadrant		Axillary lymph node dissection alone		47.97.0	Nationwide Children's Hospital			TCGA-AN-A0AK-F68942	62A33B4D-8305-4A17-85E8-832C43A07ED5				Positive		0			Negative	Modified Radical Mastectomy				NO	31	23					0								dextran coated charcoal	80-89%	59A32859-6E18-4B8E-894C-610AEAF174F4
TCGA-MS-A51U-01A					44	Left	Primary Tumor Field			271.56.0	Nationwide Children's Hospital	TCGA-MS-A51U-D64916	E6091FDA-563B-4A0F-A091-666380676D1E	TCGA-MS-A51U-F59818	5CC7E973-2B41-4164-B766-828CA02625F3	TCGA-MS-A51U-R66068	A8E94E4E-431A-46FA-84EF-9001BDAD527D		Positive					Positive	Modified Radical Mastectomy					31	4			116	57	0				266	218	NO	Adriamycin		90-99%	AE41EBA3-35F8-4592-9992-42EEB2122B83
TCGA-LL-A7T0-01A					70	Left Lower Inner Quadrant		Axillary lymph node dissection alone		360.42.0	Nationwide Children's Hospital			TCGA-LL-A7T0-F64970	5E8482F3-AA4B-4156-A3DD-F383B7FF97D8				Positive	3 Point Scale	1+	3 Point Scale		Positive	Simple Mastectomy				NO	31	16					0									90-99%	1C9BE900-ABA0-4949-B8E3-5056C757FA60
TCGA-A8-A0A9-01A					80	Left Upper Outer Quadrant	Primary Tumor Field			47.97.0	Nationwide Children's Hospital	TCGA-A8-A0A9-D37904	9728FE30-70C8-4399-84BC-DCE88562667E	TCGA-A8-A0A9-F40323	2268A2C4-38E4-4EAA-AE4D-4454ED86BB07	TCGA-A8-A0A9-R38194	89CEC5DA-77F7-448B-9CC1-9A2DE6F37364		Positive					Positive	Other					31	16				31	0				153	123		Anastrozole			8A158487-22D4-44E1-A0D7-36D8ABCC6092
TCGA-AO-A0J5-01A					48	Right	Regional site	Axillary lymph node dissection alone		56.90.0	Nationwide Children's Hospital	TCGA-AO-A0J5-D6006	2819fde9-35d0-4e7e-a9eb-da8263789223	TCGA-AO-A0J5-F19407	9C35625C-89D6-48BA-AE91-2B8411B85217	TCGA-AO-A0J5-R5870	f3025f80-8525-4819-b6cc-e2b2cd2207ed								Modified Radical Mastectomy			1	NO	31	12			422	9	0	735			371	336		Femara (Letrozole)			528A7E80-513A-4D79-863A-A1BCB6700419		Scheduled Follow-up Submission
TCGA-GM-A2DH-01A					58	Right Upper Outer Quadrant		Sentinel node biopsy alone		167.74.0	Nationwide Children's Hospital	TCGA-GM-A2DH-D47085	4B6748E0-604F-422B-9752-189DFFF16BD8	TCGA-GM-A2DH-F47081	42FCC169-41BB-48F3-BB58-86689559BD62				Negative					Negative	Simple Mastectomy				YES	31	22			233	170	0						NO	Cytoxan		<10%	FEDEDEA5-3F35-4EDE-8EF7-47D8FB299C6B	2.80
TCGA-A2-A3XY-01A	NO	YES			49	Left Upper Outer Quadrant	Distant site	Axillary lymph node dissection alone		239.55.0	Nationwide Children's Hospital	TCGA-A2-A3XY-D43315	D420260B-7367-4532-AC11-A5A0966EBCBC	TCGA-A2-A3XY-F43311	02379C43-DB21-44A9-AE3C-0A268B0FAB40	TCGA-A2-A3XY-R55837	0F6362E1-CAE1-405E-9935-8D0EB86AF3EF		Negative					Negative	Modified Radical Mastectomy				NO	31	16			1058	816	0			1072	1082	1074	NO	Denosumab			4B896F6D-DDE8-4229-8DDE-ABDC3A05A00A
TCGA-A8-A06T-01A					75	Left Upper Outer Quadrant				47.97.0	Nationwide Children's Hospital	TCGA-A8-A06T-D37762	686C3C70-6D5F-4633-B169-6268CF0EF5A7	TCGA-A8-A06T-F40816	989E9C4A-0708-4FBE-BC59-EFEB8FBA5FBB				Positive					Positive	Other		n/a			31	2				0	0							Anastrozole			01656F94-EC20-4280-AB6D-0C8F1A9EB6F9
TCGA-E2-A1LI-01A					57	Left Upper Outer Quadrant	Primary Tumor Field	Sentinel node biopsy alone		136.76.0	Nationwide Children's Hospital	TCGA-E2-A1LI-D20624	EDBA2340-0F7F-49B5-9FBD-5B68A1F31507	TCGA-E2-A1LI-F20623	8BAE43AC-77BB-4AC6-9756-C0A746B794DC	TCGA-E2-A1LI-R20626	B73909E2-58E4-42C3-AFFF-2F8746177C50		Negative	3 Point Scale		3 Point Scale		Negative	Lumpectomy			1	NO	31	12			112	42	0				194	152	NO	Cytoxan			3767CFB7-2BD0-40BA-9670-40B9AD53848C		Scheduled Follow-up Submission
TCGA-E2-A1LI-11A					57	Left Upper Outer Quadrant	Primary Tumor Field	Sentinel node biopsy alone		136.76.0	Nationwide Children's Hospital	TCGA-E2-A1LI-D20624	EDBA2340-0F7F-49B5-9FBD-5B68A1F31507	TCGA-E2-A1LI-F20623	8BAE43AC-77BB-4AC6-9756-C0A746B794DC	TCGA-E2-A1LI-R20626	B73909E2-58E4-42C3-AFFF-2F8746177C50		Negative	3 Point Scale		3 Point Scale		Negative	Lumpectomy			1	NO	31	12			112	42	0				194	152	NO	Cytoxan			3767CFB7-2BD0-40BA-9670-40B9AD53848C		Scheduled Follow-up Submission
TCGA-BH-A0DO-01B					78	Left Upper Inner Quadrant				93.85.0	Nationwide Children's Hospital			TCGA-BH-A0DO-F63671	609BA6DE-5B63-4ABA-A085-21880B110253				Positive					Positive	Simple Mastectomy					31	15					0						NO				F6721FF6-E7D9-4ED8-8204-B5BA9A18D3E5
TCGA-BH-A0DO-11A					78	Left Upper Inner Quadrant				93.85.0	Nationwide Children's Hospital			TCGA-BH-A0DO-F63671	609BA6DE-5B63-4ABA-A085-21880B110253				Positive					Positive	Simple Mastectomy					31	15					0						NO				F6721FF6-E7D9-4ED8-8204-B5BA9A18D3E5
TCGA-B6-A0IN-01A	YES		NO		45	Right		No axillary staging		56.90.0	Nationwide Children's Hospital			TCGA-B6-A0IN-F12625	B47C325B-7239-402E-8708-8C6DE45E6459			Negative	Positive				Modified radical mastectomy	Negative	Other				NO	31	2					0			1412					Image Analysis		4B15ADD3-2A41-4BC6-815C-61B477B95EC9		Scheduled Follow-up Submission
TCGA-OL-A6VO-01A					43	Right Lower Outer Quadrant	Primary Tumor Field	Sentinel node biopsy alone		338.45.0	Nationwide Children's Hospital	TCGA-OL-A6VO-D65548	AB34EC19-3799-4671-962A-F4C7E3E37EA6	TCGA-OL-A6VO-F59365	E7A38310-96E2-4B1D-93D6-BF1D8DC187E4	TCGA-OL-A6VO-R63547	C53F9699-EC12-450E-A717-917D11632C0A		Negative					Negative	Lumpectomy					31	10			147	71	0				201	156		Cytoxan			95963FED-091D-4BB1-A5E2-46234D3AF275
TCGA-EW-A2FS-01A					41	Left Upper Outer Quadrant	Primary Tumor Field	Sentinel node biopsy alone		155.73.0	Nationwide Children's Hospital	TCGA-EW-A2FS-D32295	E518AF83-5C33-4071-BCE1-1E37F303A078	TCGA-EW-A2FS-F42061	07000F6B-F69E-4B6B-AB76-A744BB203540	TCGA-EW-A2FS-R32288	0AB7DA2D-C868-42CA-9C7C-A4C0DAD3EC9E		Positive	3 Point Scale	1+	3 Point Scale		Negative	Lumpectomy			1	YES	31	10			332	248	0				439	394	NO	Paclitaxel		90-99%	E17BA177-3AD8-43A4-93AF-871A7C5B5C0C		Scheduled Follow-up Submission
TCGA-E9-A249-01A					45	Left Upper Outer Quadrant	Regional site	Axillary lymph node dissection alone		142.78.0	Nationwide Children's Hospital	TCGA-E9-A249-D39725	877690E5-008F-454B-9C29-5210E3FCA338	TCGA-E9-A249-F49108	7E07DC42-0F43-488D-9ED8-EBA590B0B5FC	TCGA-E9-A249-R31250	1F1A22C3-9307-4C5F-8EA2-A29C7D429E58								Lumpectomy			1	NO	31	25			100	28	0				155	128	NO	Doxorubicin			05443316-23AD-4BF5-9D39-6396D45CFBB3		Scheduled Follow-up Submission
TCGA-AR-A24Q-01A					49	Left Upper Inner Quadrant	Primary Tumor Field	Sentinel lymph node biopsy plus axillary dissection		142.78.0	Nationwide Children's Hospital	TCGA-AR-A24Q-D31418	C01824C6-29F9-492F-9DA8-E9A25BD34492	TCGA-AR-A24Q-F49495	8704C7B2-E9AF-4A4A-813B-1B4FB8257422	TCGA-AR-A24Q-R31406	94DB3EB1-1ED0-4F5D-AA78-0482FB31D9FF		Positive					Negative	Simple Mastectomy			1		31	2			1988	208	0				230	196		Anastrozole		<10%	2DB2CDC4-58EE-45D5-8622-4B1D51B37DB3		Scheduled Follow-up Submission
TCGA-EW-A1PE-01A					56	Left Upper Outer Quadrant	Primary Tumor Field	Axillary lymph node dissection alone		117.78.0	Nationwide Children's Hospital	TCGA-EW-A1PE-D30263	DD378684-5C18-47DC-902E-D3280283DAAB	TCGA-EW-A1PE-F29108	24F4F0FF-7280-401C-AA8D-816162986D9B	TCGA-EW-A1PE-R30266	E51F4CA1-EFA3-4660-BE2F-4A2E464A2496		Positive	3 Point Scale	3+	3 Point Scale		Positive	Lumpectomy			1	NO	31	8			111	71	0				269	208	NO	Fluorouracil		90-99%	6E601F28-E13F-4DA5-8215-6C973891A2E3		Scheduled Follow-up Submission
TCGA-AR-A0TS-01A					46	Right	Primary Tumor Field	Sentinel lymph node biopsy plus axillary dissection		85.85.0	Nationwide Children's Hospital	TCGA-AR-A0TS-D19194	3B977891-44ED-474F-973E-0BB631AA37E4	TCGA-AR-A0TS-F49516	4ABA8613-33A6-4918-9B4F-8315C2EDA06A	TCGA-AR-A0TS-R18646	B5DA5037-58AA-4B53-B86A-0C254CBEECE0		Negative		0			Negative	Lumpectomy			1	YES	31	2			156	114	0				228	185		Paclitaxel			D7F2ED0A-990E-4C9A-8463-B76CD7BFF3FF		Scheduled Follow-up Submission
TCGA-BH-A208-01A					48	Left				136.76.0	Nationwide Children's Hospital														Lumpectomy					31	8					0										EBD646D4-D7BB-4C41-A070-67CDCA08B1E1
TCGA-BH-A208-11A					48	Left				136.76.0	Nationwide Children's Hospital														Lumpectomy					31	8					0										EBD646D4-D7BB-4C41-A070-67CDCA08B1E1
TCGA-OL-A66K-01A					72	Right Upper Outer Quadrant		Sentinel node biopsy alone		305.50.0	Nationwide Children's Hospital			TCGA-OL-A66K-F58498	A7D35DF2-9B47-41B2-B62E-898F9B98D659				Positive					Positive	Simple Mastectomy					31	11					0									70-79%	EFBBA9E8-7AFC-496E-883B-F24D02E89E80
TCGA-A7-A4SF-01A					54	Right	Primary Tumor Field	Sentinel node biopsy alone		271.56.0	Nationwide Children's Hospital	TCGA-A7-A4SF-D40586	0F0BE62E-9086-4B0B-9D8A-0D6DE8B921E5	TCGA-A7-A4SF-F49721	FBC837B9-2100-498A-9BB9-BAEFE1F2EEB5	TCGA-A7-A4SF-R40587	305434B5-E683-4AEB-AA5E-B6BF6E111BA7	Positive	Positive	3 Point Scale			Other	Negative	Lumpectomy	Right Breast Reexcision			YES	31	9				306	0				279	232		Anastrozole		90-99%	762AD983-8350-4932-B8D9-F4597D7E30A0
TCGA-E2-A10A-01A	YES	YES	NO		41	Left Upper Outer Quadrant	Distant Recurrence	Sentinel node biopsy alone		85.85.0	Nationwide Children's Hospital	TCGA-E2-A10A-D17430	4729CED9-4A3B-43B6-AB21-95DC86CFA9FE	TCGA-E2-A10A-F17422	9389E64B-E562-45E1-8E41-869781EEF1FC	TCGA-E2-A10A-R7698	7ef33888-270b-489f-900d-6d0b83e76ddf		Positive					Positive	Simple Mastectomy			1	NO	31	13				148	0			75	130	119		Zometa	Allred score 4+3=7		1213855D-4709-49CD-A79D-1D0D45BDA623		Scheduled Follow-up Submission
TCGA-A2-A0CO-01A					85	Right	Primary Tumor Field	Axillary lymph node dissection alone		227.60.0	Nationwide Children's Hospital	TCGA-A2-A0CO-D33664	68699598-6953-48BB-BD8B-76AC54625819	TCGA-A2-A0CO-F42395	D9046E4C-FEFF-41E2-BE64-6931E4173BA9	TCGA-A2-A0CO-R33660	8FD8C301-7FE0-4D3A-923B-6A5A1911E753		Positive	3 Point Scale	2+	3 Point Scale		Positive	Modified Radical Mastectomy				NO	31	18				513	0				134	128	NO	Arimidex		40-49%	870B7C7A-D8C5-4CDF-A88A-5E577DB73309
TCGA-AO-A1KQ-01A					84	Left		Sentinel lymph node biopsy plus axillary dissection		109.88.0	Nationwide Children's Hospital	TCGA-AO-A1KQ-D9884	0dd32c09-be32-467e-9a5b-83a6e7f6f713	TCGA-AO-A1KQ-F21775	DB04403E-1473-4BBC-B665-0103F9DB2608					4 Point Scale		4 Point Scale			Modified Radical Mastectomy				NO	31	20				49	0						NO	Tamoxifen			E288B5EC-4BC3-40DF-8149-DBD5C9A7542E		Scheduled Follow-up Submission
TCGA-E2-A2P6-01A					77	Left Upper Outer Quadrant		Sentinel node biopsy alone		185.69.0	Nationwide Children's Hospital	TCGA-E2-A2P6-D33515	06510269-80AF-46F3-B6EA-7AE5484CBCC2	TCGA-E2-A2P6-F68574	51E462D5-D07F-4E42-A9E8-4171DEEE1AE1			Negative	Positive				Modified radical mastectomy	Positive	Lumpectomy				NO	31	26				106	0						NO	Anastrozole	Allread score 5+3 = 8		2DD621FA-ED81-4420-9AF9-F0E3EADEE86D		Scheduled Follow-up Submission
TCGA-A8-A09N-01A					57	Right Lower Outer Quadrant				47.97.0	Nationwide Children's Hospital								Positive					Positive	Other					31	27					0										EFD57B54-5B95-48D1-B574-0BA8F8297CA8
TCGA-V7-A7HQ-01A					75	Right Lower Outer Quadrant	Primary Tumor Field	Sentinel lymph node biopsy plus axillary dissection		338.45.0	Nationwide Children's Hospital	TCGA-V7-A7HQ-D71971	AAF9A475-0FCA-4018-A727-0BCEFFE5281D	TCGA-V7-A7HQ-F71970	5C6DF2E3-461B-4B41-B40C-9C1ED089EE74	TCGA-V7-A7HQ-R71972	FFFCCFB6-6613-401F-9E04-8B3517F882FE	Negative	Positive	3 Point Scale	3+	3 Point Scale	Other	Positive	Modified Radical Mastectomy	Additional resection/ margins (taken after first margin positive)			NO	31	31			1869	129	0				133	90		letrozole		60-69%	6D7C0171-3596-42E7-85EB-95FF5AF30793	1.0
TCGA-JL-A3YX-01A					46	Left		Axillary lymph node dissection alone		234.53.0	Nationwide Children's Hospital								Positive	3 Point Scale	2+	3 Point Scale		Positive	Modified Radical Mastectomy					31	8					0									30-39%	BC47E9C1-2188-460B-8ED8-3B40F15EF72B
TCGA-A2-A3XZ-01A					46	Left Upper Outer Quadrant		Sentinel node biopsy alone		239.55.0	Nationwide Children's Hospital	TCGA-A2-A3XZ-D34518	3F688A9E-5E71-4676-BA57-190015FED400	TCGA-A2-A3XZ-F43307	24F38B79-CE2B-497E-A800-AAD515C7A2B1				Negative					Negative	Simple Mastectomy				YES	31	17			423	97	0							Trastuzumab			5B0AEE80-9651-46C8-8AA4-72B2C7274B92
TCGA-C8-A278-01A					61	Left				142.78.0	Nationwide Children's Hospital	TCGA-C8-A278-D70993	C2C73BBA-5B7A-4D5E-9026-7C416C68754A	TCGA-C8-A278-F20278	C06E117F-44A5-4CD4-8B4B-0149099DECE2				Negative					Negative	Other					31	9				23	0							Tamoxifen			8535D2A7-14F4-4F15-9444-39EA77482CC5		Scheduled Follow-up Submission
TCGA-AC-A62Y-01A					79	Right		Sentinel node biopsy alone		305.50.0	Nationwide Children's Hospital			TCGA-AC-A62Y-F65833	566B4F48-EA89-45EB-B57F-28D307B98C2C				Positive	3 Point Scale		3 Point Scale		Positive	Modified Radical Mastectomy				NO	31	30					0									90-99%	46C1CB0A-CF9D-43DE-8793-2E36C31FE108
TCGA-AC-A2BK-01A					78	Left Upper Outer Quadrant	Primary Tumor Field	Axillary lymph node dissection alone		216.63.0	Nationwide Children's Hospital	TCGA-AC-A2BK-D43992	8283B14A-D235-4D20-B272-9B4A8A095886	TCGA-AC-A2BK-F43987	256CE2CD-BE4C-49CD-8395-1A4991708D69	TCGA-AC-A2BK-R43989	5F23873B-7D5F-43C9-86F1-820C26351615		Negative					Negative	Modified Radical Mastectomy				NO	31	10			164	149	0				254	203	NO	Avastin			722436FF-7D55-4638-B379-D20ADBC29D2E
TCGA-AC-A2BK-11A					78	Left Upper Outer Quadrant	Primary Tumor Field	Axillary lymph node dissection alone		216.63.0	Nationwide Children's Hospital	TCGA-AC-A2BK-D43992	8283B14A-D235-4D20-B272-9B4A8A095886	TCGA-AC-A2BK-F43987	256CE2CD-BE4C-49CD-8395-1A4991708D69	TCGA-AC-A2BK-R43989	5F23873B-7D5F-43C9-86F1-820C26351615		Negative					Negative	Modified Radical Mastectomy				NO	31	10			164	149	0				254	203	NO	Avastin			722436FF-7D55-4638-B379-D20ADBC29D2E
TCGA-A7-A0CJ-01A					57	Left	Primary Tumor Field	Sentinel lymph node biopsy plus axillary dissection		47.97.0	Nationwide Children's Hospital	TCGA-A7-A0CJ-D13150	03D86C19-07DE-41C5-8A27-A742EA3E7D3D	TCGA-A7-A0CJ-F39740	50209FC0-82C7-48DE-8CD9-0F33E8125B0E	TCGA-A7-A0CJ-R2937	06bbdff4-295e-481d-90e9-5038ee936ce3						Other		Lumpectomy	Re-excision of the inferior margin		1	YES	31	31				203	0				202	152		Arimidex			8EA0606C-B6DC-435B-8D55-0A2C424C4FD8
TCGA-AO-A1KP-01A					77	Left		Sentinel lymph node biopsy plus axillary dissection		109.88.0	Nationwide Children's Hospital	TCGA-AO-A1KP-D9889	756b07bd-7b7d-499b-a092-be8e6c7eab77	TCGA-AO-A1KP-F21774	57BE50C2-0DB3-4688-8591-106B44818CA6					4 Point Scale		4 Point Scale			Simple Mastectomy				YES	31	20			237	86	0						NO	Methotrexate			74F3DBFA-1619-4978-AF93-9EDFF01B187D		Scheduled Follow-up Submission
TCGA-3C-AALK-01A					52	Right		Sentinel node biopsy alone		379.34.0	Nationwide Children's Hospital	TCGA-3C-AALK-D65526	404CEE87-D8B8-4CEE-92A7-3A7FAD80183C	TCGA-3C-AALK-F68063	508BF78A-4516-408C-90B2-CA6EC2BA9F5E				Positive					Positive	Simple Mastectomy				YES	31	13			528	371	0							Trastuzumab		70-79%	CFA199EE-CE6A-45F5-A7E0-4203140BD626
TCGA-BH-A18R-01A					50	Right Upper Outer Quadrant				93.85.0	Nationwide Children's Hospital								Indeterminate					Negative	Modified Radical Mastectomy					31	3					0						NO			20-29%	E9B5B0E3-9245-46CF-A958-520DF8727A29
TCGA-BH-A18R-11A					50	Right Upper Outer Quadrant				93.85.0	Nationwide Children's Hospital								Indeterminate					Negative	Modified Radical Mastectomy					31	3					0						NO			20-29%	E9B5B0E3-9245-46CF-A958-520DF8727A29
TCGA-E2-A14P-01A					79	Right Upper Outer Quadrant	Primary Tumor Field	Axillary lymph node dissection alone		93.85.0	Nationwide Children's Hospital	TCGA-E2-A14P-D18847	1097E387-AF7B-476A-AE90-ECF89836F10D	TCGA-E2-A14P-F18846	28693AEC-5F7F-45B2-BEA4-2250E4909DBE	TCGA-E2-A14P-R18848	6DC4F0B6-6E08-4D24-9535-30E94160D27B		Negative					Negative	Lumpectomy			1	NO	31	20			396	39	0				90	47	NO	Trastuzumab	Allred score 0+0 = 0		8BBE221B-38F9-4CF4-BAB7-F5C701251244		Scheduled Follow-up Submission
TCGA-B6-A0RP-01A	YES	NO	NO		73	Left		Axillary lymph node dissection alone		72.90.0	Nationwide Children's Hospital			TCGA-B6-A0RP-F13786	3A57F47C-7FC0-48B0-9F95-B5C63CEC73BE			Negative	Positive				Modified radical mastectomy	Positive	Lumpectomy				NO	31	12					0			2787					Image Analysis		A0759C49-5FF9-40C7-AC9D-6CD58F66C07F		Scheduled Follow-up Submission
TCGA-AR-A2LN-01A					65	Right Upper Outer Quadrant		Sentinel lymph node biopsy plus axillary dissection		177.73.0	Nationwide Children's Hospital	TCGA-AR-A2LN-D37541	CECA734C-34EE-4E7A-BE8F-82D7437D58FB	TCGA-AR-A2LN-F37537	31DA3189-1539-4BBF-8C9F-E5EB069F3D56				Positive					Positive	Other					31	6				15	0						NO	Letrozole		70-79%	52945042-DF3F-4BF4-80CA-EAB1A2C42A63
TCGA-AN-A0FV-01A					58	Right Upper Outer Quadrant		No axillary staging		47.97.0	Nationwide Children's Hospital			TCGA-AN-A0FV-F68965	B6FDCFD2-3073-48EF-8C35-A799915D4467				Negative					Negative	Modified Radical Mastectomy				NO	31	24					0										C3646075-43CB-4868-9543-8BA829F37E59
TCGA-A2-A0EM-01A					73	Right Upper Inner Quadrant	Primary Tumor Field	Sentinel node biopsy alone		56.90.0	Nationwide Children's Hospital	TCGA-A2-A0EM-D1856	74da4aa7-764e-4340-8062-1e2f5b8e5479	TCGA-A2-A0EM-F13714	B2013AC6-E2F9-4125-9F5F-459BAE754700	TCGA-A2-A0EM-R1857	dc50a49e-3060-45e5-b116-412aadc8f497		Positive					Positive	Lumpectomy			1	YES	31	9				75	0				119	72		Tamoxifen			A6513816-8524-425B-9008-B757D8CC83B2		Scheduled Follow-up Submission
TCGA-B6-A402-01A	YES	NO			47	Right Lower Outer Quadrant	Primary Tumor Field	Sentinel node biopsy alone		239.55.0	Nationwide Children's Hospital	TCGA-B6-A402-D59670	AA69A790-B2B4-49B2-B8C3-907251C7338C	TCGA-B6-A402-F59668	CE3A84EC-BBCB-4860-8564-F07B7D1F291A	TCGA-B6-A402-R40853	770A2F31-3163-492C-A9D0-4F49CD54D734		Negative	4 Point Scale	1+	4 Point Scale		Negative	Lumpectomy				YES	31	3			2232	2176	0			2330	310	278		Doxil		<10%	702908C9-FE5D-4399-85CD-1393AC9E7483
TCGA-AC-A6NO-01A					43	Right		Axillary lymph node dissection alone		338.45.0	Nationwide Children's Hospital								Positive					Positive	Modified Radical Mastectomy				NO	31	10					0										220106C0-4319-4A61-B243-BE916BA32F70
TCGA-GM-A3XG-01A					46	Right Upper Outer Quadrant	Primary Tumor Field	Sentinel lymph node biopsy plus axillary dissection		255.56.0	Nationwide Children's Hospital	TCGA-GM-A3XG-D41972	1E050AB5-3F95-403F-9CD2-15E62549A9B0	TCGA-GM-A3XG-F46963	9CCD1072-5A2E-4CCA-AA65-DAEFDFE36A3A	TCGA-GM-A3XG-R35511	2085DEFE-099C-42C0-92EF-DF939B5A7AEF		Positive					Positive	Modified Radical Mastectomy				YES	31	20			843	813	0				415	372		Arimidex		90-99%	4CD318CA-E6A5-4260-B016-63C2995CD47D	1.67
TCGA-A2-A4S3-01A					59	Left Upper Outer Quadrant		Axillary lymph node dissection alone		271.56.0	Nationwide Children's Hospital			TCGA-A2-A4S3-F59128	06C49930-B182-44EA-8B71-8FCF2306DD46				Positive					Positive	Modified Radical Mastectomy				NO	31	1					0									90-99%	2FF6A66A-0DF8-4A1B-B731-B5B0C48E796D
TCGA-S3-A6ZG-01A					71	Left Upper Outer Quadrant	Primary Tumor Field	Sentinel node biopsy alone		334.45.0	Nationwide Children's Hospital	TCGA-S3-A6ZG-D64188	CE65FD9A-E5F7-42B1-8603-9979F90ABD5F	TCGA-S3-A6ZG-F63645	17174B64-048E-4778-9D5E-70492306C048	TCGA-S3-A6ZG-R63648	2C875BB6-139D-4B69-95DF-8D8F732E4308		Positive	3 Point Scale		3 Point Scale		Positive	Lumpectomy				YES	31	27			100	52	0				326	269		NEULASTA	CAP scoring guideline 2010	90-99%	053137A4-7E83-4682-8456-99EA12593CFF
TCGA-AR-A255-01A					62	Right Lower Inner Quadrant	Primary Tumor Field	Sentinel lymph node biopsy plus axillary dissection		142.78.0	Nationwide Children's Hospital	TCGA-AR-A255-D31922	5283FFF6-C4EA-4F3D-AD5E-CAB099B3DF37	TCGA-AR-A255-F49512	B39FC06A-9138-40FC-9163-EF2896BEC091	TCGA-AR-A255-R31919	339C3612-78BA-4998-8944-2594F16E7315		Positive					Positive	Other			1	YES	31	2				96	0				89	47		Anastrozole			0DD9FCD4-89A8-49FF-8DF3-B4E929C9578F		Scheduled Follow-up Submission
TCGA-C8-A3M8-01A					68	Right Upper Outer Quadrant		Axillary lymph node dissection alone		202.69.0	Nationwide Children's Hospital	TCGA-C8-A3M8-D70780	1A0AC881-C2A3-4989-8D7D-837481DF0F5B	TCGA-C8-A3M8-F70779	36BA9AA0-FB67-44C6-8E4E-E8BDB8C92DB5				Positive					Positive	Modified Radical Mastectomy				NO	31	9				79	0						NO	Tamoxifen			24D42E64-052E-46C0-8651-61479015172C
TCGA-A8-A09V-01A					51	Right Upper Inner Quadrant	Primary Tumor Field			56.90.0	Nationwide Children's Hospital	TCGA-A8-A09V-D37903	4BD8862A-EC1F-43A3-8343-7616B73F5DB5	TCGA-A8-A09V-F40328	0021AB34-8C5F-451E-8B64-DF949CB50034	TCGA-A8-A09V-R38193	19729E19-9B06-4822-85A2-5D7A86976764		Positive					Positive	Other					31	17				123	0				92	31		Tamoxifen			382CCB33-AC92-4995-994E-07C9AB6E6342
TCGA-A2-A3XW-01A					42	Right	Regional site	Sentinel lymph node biopsy plus axillary dissection		239.55.0	Nationwide Children's Hospital	TCGA-A2-A3XW-D34434	5E8166C0-1206-4A0B-9FC3-806B511A494D	TCGA-A2-A3XW-F43308	1833A0D9-50FC-4878-803D-9D8BDDA26F14	TCGA-A2-A3XW-R34436	D8B2A178-D939-450D-8DCA-F834111F718B		Positive	3 Point Scale				Negative	Simple Mastectomy				YES	31	16				341	0				308	265	NO	Tamoxifen		90-99%	5E4E4C43-0325-47A9-B69B-ABF517A6CC06
TCGA-D8-A27F-01A					40	Right Upper Outer Quadrant	Primary Tumor Field	Axillary lymph node dissection alone		147.75.0	Nationwide Children's Hospital	TCGA-D8-A27F-D29516	623BDB83-F7A0-4C0E-8D45-D2C8A45913FF	TCGA-D8-A27F-F29515	57370D31-378D-4228-9DAA-39A366A418B6	TCGA-D8-A27F-R29517	971EDB07-58FF-45DD-9E58-5B6F0310BF2A		Negative					Negative	Modified Radical Mastectomy				NO	31	21			488	379	0				182	158	NO	adriamycin+cyclophosphamide			C1D425FB-2FF3-4A8C-84AA-0EF27366F0B1		Scheduled Follow-up Submission
TCGA-A2-A0EU-01A					79	Right Lower Outer Quadrant	Primary Tumor Field	Sentinel node biopsy alone		61.88.0	Nationwide Children's Hospital			TCGA-A2-A0EU-F13717	FC478CCD-9561-4F06-81A2-F8BA25C5AF85	TCGA-A2-A0EU-R1714	bc456128-c77d-444f-a359-a200d25bf391	Negative	Positive				Lumpectomy	Positive	Lumpectomy			1	YES	31	10					0				193	116				90-99%	4B7579BB-5BFD-4E17-A7AD-2E6780D62B24		Scheduled Follow-up Submission
TCGA-BH-A0DE-01A					62	Left Upper Outer Quadrant	Primary Tumor Field			85.85.0	Nationwide Children's Hospital			TCGA-BH-A0DE-F63543	BC05D1FA-6912-499B-8634-5B1EBA26C03A	TCGA-BH-A0DE-R63544	53372D2F-D9F7-48BC-8E09-94CF40CC253F		Positive					Positive	Other					31	12					0				149	105	NO				2AB86C4A-2303-4CBA-9350-24300484F597
TCGA-BH-A0DE-11A					62	Left Upper Outer Quadrant	Primary Tumor Field			85.85.0	Nationwide Children's Hospital			TCGA-BH-A0DE-F63543	BC05D1FA-6912-499B-8634-5B1EBA26C03A	TCGA-BH-A0DE-R63544	53372D2F-D9F7-48BC-8E09-94CF40CC253F		Positive					Positive	Other					31	12					0				149	105	NO				2AB86C4A-2303-4CBA-9350-24300484F597
TCGA-LL-A6FP-01A					90	Right Upper Outer Quadrant		No axillary staging		322.49.0	Nationwide Children's Hospital	TCGA-LL-A6FP-D47970	1ED178CF-05EE-41AD-B1AC-37FA1DAE065A	TCGA-LL-A6FP-F64050	31BBE6D1-6AF1-4980-985B-A696679676AA				Positive	3 Point Scale	1+	3 Point Scale		Positive	Simple Mastectomy				NO	31	25			467	257	0							Tamoxifen		90-99%	4433E0B9-3C6A-4A18-9725-3F95F457F773	3.1
TCGA-AR-A2LK-01A					62	Right Lower Outer Quadrant	Primary Tumor Field	Sentinel lymph node biopsy plus axillary dissection		167.74.0	Nationwide Children's Hospital	TCGA-AR-A2LK-D37735	F52A9E2B-71AB-4E83-826D-E7307A8EE004	TCGA-AR-A2LK-F35203	01404DEF-ED7D-4186-9DC8-5FE8C812821B	TCGA-AR-A2LK-R37267	B628417D-C4BC-45CE-968F-80AAE78899EB	Negative	Positive				Mastectomy NOS	Positive	Other					31	6			1310	263	0			1304	262	218	NO	Anastrozole		70-79%	3F2914AB-191E-4460-B1BA-9E7E9BA3D199
TCGA-S3-AA11-01A					67	Right	Primary Tumor Field	Sentinel node biopsy alone		379.34.0	Nationwide Children's Hospital	TCGA-S3-AA11-D67566	FF58F7AA-3F5B-42A3-B786-9CD8F5B3998B	TCGA-S3-AA11-F67563	9543CB0E-D4A5-447F-A0A4-AC2D3E56FC37	TCGA-S3-AA11-R58357	DC89E056-7189-4F52-A31E-1EB00BF6D61C		Positive	4 Point Scale	2+	3 Point Scale		Positive	Lumpectomy				YES	31	7				309	0				123	77		ANASTROZOLE	CAP scoring guideline 2010	90-99%	0CB7BAE7-AB1C-48A4-AA6C-BB0FE7C8F1F1	40
TCGA-AR-A24R-01A					45	Right Upper Outer Quadrant	Primary Tumor Field	Sentinel lymph node biopsy plus axillary dissection		142.78.0	Nationwide Children's Hospital	TCGA-AR-A24R-D31495	8ABD8AA5-234C-4EE7-8757-5E4639897AF3	TCGA-AR-A24R-F49499	7FD6DCC3-94BA-40B7-8949-A360B92F61D9	TCGA-AR-A24R-R31463	95453BBE-20F4-4F6E-9C53-6FC33C65D529		Positive					Positive	Other			1		31	2			1904	228	0				295	249		Tamoxifen		10-19%	63CF75D8-60E9-47F8-9D97-5FACCCBC2C5E		Scheduled Follow-up Submission
TCGA-E2-A1IG-01A					45	Right Upper Inner Quadrant	Regional site	Sentinel node biopsy alone		117.78.0	Nationwide Children's Hospital	TCGA-E2-A1IG-D70393	86F3FAA8-97CD-4A7E-B217-21DCAB6419BA	TCGA-E2-A1IG-F70394	F362DE95-E046-4400-8D1C-27C92BCA588A	TCGA-E2-A1IG-R19937	4215BF0B-2E69-49EA-8801-5539FE4BC44D		Positive	3 Point Scale		3 Point Scale		Positive	Simple Mastectomy			1	NO	31	16				1991	0				222	178	NO	Letrozole			20830076-D9BA-4955-95E5-192857EE2004		Scheduled Follow-up Submission
TCGA-E2-A1IG-11A					45	Right Upper Inner Quadrant	Regional site	Sentinel node biopsy alone		117.78.0	Nationwide Children's Hospital	TCGA-E2-A1IG-D70393	86F3FAA8-97CD-4A7E-B217-21DCAB6419BA	TCGA-E2-A1IG-F70394	F362DE95-E046-4400-8D1C-27C92BCA588A	TCGA-E2-A1IG-R19937	4215BF0B-2E69-49EA-8801-5539FE4BC44D		Positive	3 Point Scale		3 Point Scale		Positive	Simple Mastectomy			1	NO	31	16				1991	0				222	178	NO	Letrozole			20830076-D9BA-4955-95E5-192857EE2004		Scheduled Follow-up Submission
TCGA-A7-A2KD-01A					53	Right	Regional site	No axillary staging		216.63.0	Nationwide Children's Hospital	TCGA-A7-A2KD-D32490	A17F619D-81A6-4A7B-BEB1-20FA1C828843	TCGA-A7-A2KD-F39783	0D8A8821-9994-454A-BB39-BADC6341A20E	TCGA-A7-A2KD-R31158	89DD7D0D-FD33-4ABE-AEBB-2355F247846D		Positive	3 Point Scale	3+	3 Point Scale		Positive	Modified Radical Mastectomy			1	NO	31	1			435	57	0				235	196		Herceptin		90-99%	4631632C-FF85-4405-9C93-5AA32820FDB7		Scheduled Follow-up Submission
TCGA-BH-A18V-01A					48	Right		Axillary lymph node dissection alone		93.85.0	Nationwide Children's Hospital								Negative					Negative	Other					31	2					0						YES				5ED75805-8D2B-4DC3-B899-EE11E9921A3A
TCGA-BH-A18V-06A					48	Right		Axillary lymph node dissection alone		93.85.0	Nationwide Children's Hospital								Negative					Negative	Other					31	2					0						YES				5ED75805-8D2B-4DC3-B899-EE11E9921A3A
TCGA-BH-A18V-11A					48	Right		Axillary lymph node dissection alone		93.85.0	Nationwide Children's Hospital								Negative					Negative	Other					31	2					0						YES				5ED75805-8D2B-4DC3-B899-EE11E9921A3A
TCGA-OL-A66O-01A					39	Right Upper Outer Quadrant	Primary Tumor Field	Sentinel node biopsy alone		322.49.0	Nationwide Children's Hospital	TCGA-OL-A66O-D65244	A6C0E34D-00F1-42B6-883B-AE2C88CD9296	TCGA-OL-A66O-F58497	F6A56281-31A1-4289-A7C1-D2F3125484E4	TCGA-OL-A66O-R64492	2489265C-022C-47F6-BFDF-9A678B41BC79		Positive					Positive	Modified Radical Mastectomy					31	11			192	129	0				121	77		Taxotere		90-99%	47189B5C-C65E-40F0-82C2-78507BA0CAF8
TCGA-C8-A1HN-01A					56	Left		Axillary lymph node dissection alone		103.78.0	Nationwide Children's Hospital			TCGA-C8-A1HN-F71885	60E148CB-FB45-4819-918F-BD620D94710E				Positive					Positive	Modified Radical Mastectomy					31	31					0						NO				3297785D-1F73-4EA2-AD30-FD5DEADD2A2C		Scheduled Follow-up Submission
TCGA-A8-A08T-01A					64	Right				47.97.0	Nationwide Children's Hospital			TCGA-A8-A08T-F40559	643ED7A2-6EA2-4E09-A96E-6C6D54CFBEF0				Positive					Positive	Other					31	24					0			2557							0177A52F-6202-4D52-AA1D-2300139C07B6
TCGA-A8-A08S-01A					71	Left	Primary Tumor Field			56.90.0	Nationwide Children's Hospital	TCGA-A8-A08S-D37747	F9B9A52B-AF15-41B3-9116-D18A681DCB1B	TCGA-A8-A08S-F40560	A5D239B1-ABC3-4829-A371-345C8E7AA795	TCGA-A8-A08S-R38153	AEAE8ED5-C523-482A-A2FA-F1B611263248		Positive					Positive	Other		n/a			31	24				62	0				62	31		Anastrozole			526FDB60-7996-47E4-8DDF-5CF99319780F
TCGA-E2-A1B4-01A					74	Left Upper Inner Quadrant	Primary Tumor Field	Sentinel node biopsy alone		96.78.0	Nationwide Children's Hospital	TCGA-E2-A1B4-D19444	A6C154F3-9CE0-4FC3-943B-640A43ADC915	TCGA-E2-A1B4-F19443	C0578C7E-FCF4-4943-8D39-E0350CDF44D3	TCGA-E2-A1B4-R19446	BD169F79-61EA-4201-866C-A99BFEB0CFC4		Positive					Positive	Lumpectomy			1	NO	31	8			1004	176	0				187	83	NO	arimidex	Allred score 5+3 = 8		0B5EE19D-D7B6-4C81-8355-EED8CF775EE4		Scheduled Follow-up Submission
TCGA-E9-A2JT-01A					63	Left Upper Outer Quadrant	Primary Tumor Field	Axillary lymph node dissection alone		177.73.0	Nationwide Children's Hospital	TCGA-E9-A2JT-D34098	9899A8BD-E368-4788-944F-E1685DA002C6	TCGA-E9-A2JT-F40292	1B8BFE3C-EFD6-44EC-83E7-D91CA4678C10	TCGA-E9-A2JT-R34099	0BD58064-0B71-450B-9DF6-ECD92445BE83								Lumpectomy				NO	31	15				27	0				87	58		Tamoxifen			CC1CF29D-A7E9-443A-BA18-CAB0657A08BA		Scheduled Follow-up Submission
TCGA-BH-A0BG-01A					73	Left Lower Outer Quadrant	Primary Tumor Field			85.85.0	Nationwide Children's Hospital			TCGA-BH-A0BG-F58615	C970540D-F1A7-425C-BEF1-2AD70CD6AD13	TCGA-BH-A0BG-R58616	FBA2D677-DEA7-483C-AA88-82D4D14CB644		Negative					Negative	Other					31	16					0				131	84	NO				6F021DC3-7197-462E-A491-9CB669529B63
TCGA-A2-A3XX-01A					49	Left Lower Outer Quadrant		Sentinel node biopsy alone		239.55.0	Nationwide Children's Hospital	TCGA-A2-A3XX-D34441	B6FD1396-6FE8-44FF-A6AC-72B380261AD5	TCGA-A2-A3XX-F43310	F765B888-581A-4FC9-804A-2FD66F290AF9				Negative					Negative	Simple Mastectomy				YES	31	16			185	143	0						NO	Paclitaxel			FDAED897-7FC9-4D32-BDA4-625242D25228
TCGA-E2-A1L9-01A					40	Right	Primary Tumor Field	Sentinel node biopsy alone		109.88.0	Nationwide Children's Hospital	TCGA-E2-A1L9-D20598	4A43A807-30FB-4969-B77C-A3BC9D040351	TCGA-E2-A1L9-F20597	1D1EB5B9-2C8B-47F3-BBD6-E02A269BE683	TCGA-E2-A1L9-R20602	FB33C7DC-7439-4DE4-B8CE-2F122C0D2BB8		Positive	3 Point Scale		3 Point Scale		Positive	Lumpectomy			1	NO	31	11			122	55	0				177	140	NO	Cytoxan		80-89%	8412274B-4D92-46EE-B752-F0FBDD50D576		Scheduled Follow-up Submission
TCGA-EW-A423-01A					75	Left Upper Inner Quadrant	Primary Tumor Field	Sentinel node biopsy alone		255.56.0	Nationwide Children's Hospital	TCGA-EW-A423-D38933	C3B35A80-A856-4049-B06A-02E765F87BD0	TCGA-EW-A423-F38895	6E8F6BDC-E908-4D9C-94E3-779F98588303	TCGA-EW-A423-R38936	8A98C19C-07DE-43E1-8391-6975D585C793		Positive					Positive	Lumpectomy				NO	31	26				205	0				162	52		Anastrozole		50-59%	E6254B73-B2A7-48FC-B9F4-12E1637A5E0D
TCGA-A7-A4SC-01A					62	Right Upper Outer Quadrant	Regional site			271.56.0	Nationwide Children's Hospital	TCGA-A7-A4SC-D40469	D20C10DB-BE58-4536-9BE0-3547209715C7	TCGA-A7-A4SC-F49714	E86BB295-DEB8-4683-9676-D7244DFA8E00	TCGA-A7-A4SC-R40463	FA5C4F6B-BC17-4C50-A49D-9985D4D9ABDC		Positive					Negative	Simple Mastectomy				YES	31	8				169	0				166	130		TAMOXIFEN		90-99%	4F806F12-5470-4B66-BBEC-351A1E6F2A87	2.2
TCGA-A7-A4SC-11A					62	Right Upper Outer Quadrant	Regional site			271.56.0	Nationwide Children's Hospital	TCGA-A7-A4SC-D40469	D20C10DB-BE58-4536-9BE0-3547209715C7	TCGA-A7-A4SC-F49714	E86BB295-DEB8-4683-9676-D7244DFA8E00	TCGA-A7-A4SC-R40463	FA5C4F6B-BC17-4C50-A49D-9985D4D9ABDC		Positive					Negative	Simple Mastectomy				YES	31	8				169	0				166	130		TAMOXIFEN		90-99%	4F806F12-5470-4B66-BBEC-351A1E6F2A87	2.2
TCGA-E2-A9RU-01A					90	Right Lower Outer Quadrant	Primary Tumor Field	Axillary lymph node dissection alone		379.34.0	Nationwide Children's Hospital	TCGA-E2-A9RU-D60754	E37A508B-E21A-488A-B8D1-9927AA86305A	TCGA-E2-A9RU-F67578	0E1468D5-13FF-4DA9-B3E2-19E5F062869A	TCGA-E2-A9RU-R60756	4068FAFC-865C-49DB-8D79-51CEA29F727F		Positive					Negative	Lumpectomy				YES	31	6				112	0				173	166		Arimidex		70-79%	0A07B532-DD9B-46AB-9CCE-6F67CDB6C762
TCGA-D8-A13Y-01A					52	Right Upper Outer Quadrant		Axillary lymph node dissection alone		85.85.0	Nationwide Children's Hospital	TCGA-D8-A13Y-D65312	5BE46DF7-F6A7-4D7D-9ECD-B805B4C94601	TCGA-D8-A13Y-F72210	F83FC2BB-608A-4335-94F9-3607FE7D1296				Positive					Positive	Modified Radical Mastectomy				NO	31	29			161	7	0							cyclophosphamide	manual counting	70-79%	B93969DA-F3A8-41C3-B309-9185259FCC0B		Scheduled Follow-up Submission
TCGA-BH-A0B5-01A					40	Left	Primary Tumor Field			96.78.0	Nationwide Children's Hospital	TCGA-BH-A0B5-D59185	C9BF525E-EE34-4064-99CD-996F6EB4C09E	TCGA-BH-A0B5-F59182	994E9DC9-8CDF-461E-A2DB-C42A64512AE8	TCGA-BH-A0B5-R59188	814C435B-99BC-4D04-AD11-C90E47DEBE5F		Positive					Positive	Modified Radical Mastectomy					31	2			257		0				304	300	NO	Taxol			4235F081-B020-40C1-9F3D-4F6C2271FA4C
TCGA-BH-A0B5-11A					40	Left	Primary Tumor Field			96.78.0	Nationwide Children's Hospital	TCGA-BH-A0B5-D59185	C9BF525E-EE34-4064-99CD-996F6EB4C09E	TCGA-BH-A0B5-F59182	994E9DC9-8CDF-461E-A2DB-C42A64512AE8	TCGA-BH-A0B5-R59188	814C435B-99BC-4D04-AD11-C90E47DEBE5F		Positive					Positive	Modified Radical Mastectomy					31	2			257		0				304	300	NO	Taxol			4235F081-B020-40C1-9F3D-4F6C2271FA4C
TCGA-A2-A0YH-01A					53	Left Lower Outer Quadrant	Primary Tumor Field	Axillary lymph node dissection alone		74.87.0	Nationwide Children's Hospital	TCGA-A2-A0YH-D5435	e60cd9fa-5849-49a5-8bb1-69491f0379a1	TCGA-A2-A0YH-F16752	72D0FFE4-4FE3-4846-A658-E195AE00FAE0	TCGA-A2-A0YH-R5442	7446a50c-47f9-4fab-84f9-78ee16a151d5		Positive		3+			Positive	Lumpectomy			1	NO	31	16			60	60	0				264	214		Adriamycin		80-89%	52E9E8A2-B02D-423B-BEA1-FC3705CB6EB5		Scheduled Follow-up Submission
TCGA-A7-A13E-01A	YES	YES	NO		62	Left Upper Outer Quadrant	Distant site	Sentinel lymph node biopsy plus axillary dissection		96.78.0	Nationwide Children's Hospital	TCGA-A7-A13E-D30410	983433D3-76A3-4F8C-9397-6496805CDAB0	TCGA-A7-A13E-F30405	10F815AF-1701-4E90-A5B7-C9A30984BF5E	TCGA-A7-A13E-R30408	6001F2EF-D19E-42B5-8DB5-91084F93BFB8								Lumpectomy			2	NO	31	9			589	211	0			556	563	557		Anastrozole			574773BA-9B3F-47F7-9E2F-C022C7CCB35A		Additional New Tumor Event
TCGA-A7-A13E-01B	YES	YES	NO		62	Left Upper Outer Quadrant	Distant site	Sentinel lymph node biopsy plus axillary dissection		96.78.0	Nationwide Children's Hospital	TCGA-A7-A13E-D30410	983433D3-76A3-4F8C-9397-6496805CDAB0	TCGA-A7-A13E-F30405	10F815AF-1701-4E90-A5B7-C9A30984BF5E	TCGA-A7-A13E-R30408	6001F2EF-D19E-42B5-8DB5-91084F93BFB8								Lumpectomy			2	NO	31	9			589	211	0			556	563	557		Anastrozole			574773BA-9B3F-47F7-9E2F-C022C7CCB35A		Additional New Tumor Event
TCGA-A7-A13E-11A	YES	YES	NO		62	Left Upper Outer Quadrant	Distant site	Sentinel lymph node biopsy plus axillary dissection		96.78.0	Nationwide Children's Hospital	TCGA-A7-A13E-D30410	983433D3-76A3-4F8C-9397-6496805CDAB0	TCGA-A7-A13E-F30405	10F815AF-1701-4E90-A5B7-C9A30984BF5E	TCGA-A7-A13E-R30408	6001F2EF-D19E-42B5-8DB5-91084F93BFB8								Lumpectomy			2	NO	31	9			589	211	0			556	563	557		Anastrozole			574773BA-9B3F-47F7-9E2F-C022C7CCB35A		Additional New Tumor Event
TCGA-E2-A1II-01A					51	Left	Primary Tumor Field	Sentinel node biopsy alone		117.78.0	Nationwide Children's Hospital	TCGA-E2-A1II-D19955	32F5916B-52FE-4FD3-8F7D-FAFD84F63E02	TCGA-E2-A1II-F19954	27975FD4-6AE6-4CF8-B70D-97A5D77F33F1	TCGA-E2-A1II-R19959	0C04CF63-CC3C-4E0B-A37F-CAF63097FBAB		Negative					Positive	Lumpectomy			1	NO	31	21			115	73	0				236	181	NO	Doxorubicin	allred score 0 + 0 = 0		00029D5C-E5CA-4E95-B8D6-F340DE6651BD		Scheduled Follow-up Submission
TCGA-E2-A1II-11A					51	Left	Primary Tumor Field	Sentinel node biopsy alone		117.78.0	Nationwide Children's Hospital	TCGA-E2-A1II-D19955	32F5916B-52FE-4FD3-8F7D-FAFD84F63E02	TCGA-E2-A1II-F19954	27975FD4-6AE6-4CF8-B70D-97A5D77F33F1	TCGA-E2-A1II-R19959	0C04CF63-CC3C-4E0B-A37F-CAF63097FBAB		Negative					Positive	Lumpectomy			1	NO	31	21			115	73	0				236	181	NO	Doxorubicin	allred score 0 + 0 = 0		00029D5C-E5CA-4E95-B8D6-F340DE6651BD		Scheduled Follow-up Submission
TCGA-S3-AA12-01A					82	Left Lower Inner Quadrant		Sentinel lymph node biopsy plus axillary dissection		379.34.0	Nationwide Children's Hospital	TCGA-S3-AA12-D58368	1212862C-4FC4-424A-AE86-4464B10A60B1	TCGA-S3-AA12-F67620	51D6062C-FC35-4A9F-8888-CF19EC5BD0AC				Positive	3 Point Scale	2+	3 Point Scale		Negative	Simple Mastectomy				NO	31	7				58	0							ANASTROZOLE	CAP SCORING GUIDELINE 2010	90-99%	E1C1D19F-F209-4940-AA8A-40A2FCF68A44
TCGA-A1-A0SQ-01A					45	Left	Primary Tumor Field	Sentinel lymph node biopsy plus axillary dissection		117.78.0	Nationwide Children's Hospital	TCGA-A1-A0SQ-D15544	CC54C460-ED66-4313-9C2B-BA4816081388			TCGA-A1-A0SQ-R15543	DB4CABEB-052D-429F-ACF7-B550C6495F80		Positive					Positive	Modified Radical Mastectomy					31	24				299	0				329	268	NO	tamoxifen		90-99%	2BEAFEB4-BEF2-4F8D-83D9-4A7AE3031590
TCGA-BH-A0DL-01A					64	Left	Primary Tumor Field			85.85.0	Nationwide Children's Hospital	TCGA-BH-A0DL-D60393	31BEEEBA-90EE-411E-AD7B-89ABD5BE59B9	TCGA-BH-A0DL-F60389	68E48067-EBC1-4A4C-90F4-73945B7413AD	TCGA-BH-A0DL-R60391	1BDA7B8A-1E8C-4A96-832E-5D9489A9F1AD		Positive					Negative	Other					31	9			205	58	0				205	154	NO	Taxotere			CF8FF2B0-EBDC-41D9-B5C1-4059B53EDF94
TCGA-BH-A0DL-11A					64	Left	Primary Tumor Field			85.85.0	Nationwide Children's Hospital	TCGA-BH-A0DL-D60393	31BEEEBA-90EE-411E-AD7B-89ABD5BE59B9	TCGA-BH-A0DL-F60389	68E48067-EBC1-4A4C-90F4-73945B7413AD	TCGA-BH-A0DL-R60391	1BDA7B8A-1E8C-4A96-832E-5D9489A9F1AD		Positive					Negative	Other					31	9			205	58	0				205	154	NO	Taxotere			CF8FF2B0-EBDC-41D9-B5C1-4059B53EDF94
TCGA-BH-A1FB-01A					60	Right				109.88.0	Nationwide Children's Hospital								Positive					Positive						31	7					0										D09A797F-45F4-46D2-9495-E7B58BA6603D
TCGA-BH-A1FB-11A					60	Right				109.88.0	Nationwide Children's Hospital								Positive					Positive						31	7					0										D09A797F-45F4-46D2-9495-E7B58BA6603D
TCGA-EW-A1IX-01A					48	Right Upper Outer Quadrant		Sentinel lymph node biopsy plus axillary dissection		117.78.0	Nationwide Children's Hospital	TCGA-EW-A1IX-D21609	9F1CC0D6-E9B7-4875-9B34-DC146AFDC982	TCGA-EW-A1IX-F21542	0ACED877-3F0E-4050-A7E1-6CCFE9AEBEA3				Positive	3 Point Scale	3+	3 Point Scale		Positive	Other				YES	31	6				871	0						NO	Femara		90-99%	FA42CB29-2313-45C5-B16C-2CCE0AD5F895		Scheduled Follow-up Submission
TCGA-BH-A201-01A					64	Left	Primary Tumor Field			124.80.0	Nationwide Children's Hospital			TCGA-BH-A201-F64222	D0597150-E8C6-47DC-A8B9-BD013573E573	TCGA-BH-A201-R64223	94B7945B-92D9-4D1A-868B-84D66F2C3F4D		Positive					Positive	Other					31	27					0				108	56					66A9C414-FEDD-47DF-97CC-8D0A9A764F15
TCGA-GM-A2DL-01A					50	Left Upper Outer Quadrant	Primary Tumor Field	Sentinel node biopsy alone		177.73.0	Nationwide Children's Hospital	TCGA-GM-A2DL-D47102	C22DF452-BBBA-49F3-ACF1-E448627C6D68	TCGA-GM-A2DL-F47098	050D20E4-BB66-4D0F-B205-E99C63577775	TCGA-GM-A2DL-R47099	2E8B03A4-E42D-4861-97AC-4C1D485B6DE6		Positive					Positive	Lumpectomy				YES	31	22				1990	0				151	110	NO	Arimidex		90-99%	21B40B0E-A720-4A13-A294-02646A239185
TCGA-AR-A1AK-01A					70	Right		Sentinel lymph node biopsy plus axillary dissection		96.78.0	Nationwide Children's Hospital	TCGA-AR-A1AK-D22155	37D99581-850D-476B-8328-D3E0BD6DC049	TCGA-AR-A1AK-F69271	4D10493E-351E-498F-A607-D7E32C755D8A				Positive					Positive	Simple Mastectomy				YES	31	31			1843	33	0							Anastrozole		10-19%	D69F3F2A-9FAA-41D1-8ADE-5512F08E09E7		Scheduled Follow-up Submission
TCGA-BH-A5J0-01A					63	Left				288.54.0	Nationwide Children's Hospital			TCGA-BH-A5J0-F63664	10B16ACD-2E32-4414-99E9-3838D5692CFB				Positive					Positive	Simple Mastectomy					31	14					0										407B14C6-C768-4C16-99C1-1C0471FF2AA7
TCGA-A2-A0T1-01A					55	Right Upper Outer Quadrant	Primary Tumor Field	Axillary lymph node dissection alone		72.90.0	Nationwide Children's Hospital	TCGA-A2-A0T1-D3710	8ecf4ba5-9b63-4f13-90be-e4249f4d024b	TCGA-A2-A0T1-F13946	C7405E45-2C5E-4447-884E-3AF0DDDF3479	TCGA-A2-A0T1-R3713	06674eb1-647c-45ef-8d3f-63cb7fd97891		Negative					Negative	Lumpectomy			1	NO	31	18			187	46	0				252	189		Taxotere		<10%	0C6ED826-2EAC-4FE2-A614-C1E8657216FA		Scheduled Follow-up Submission
TCGA-D8-A27L-01A					49	Right Upper Inner Quadrant		Sentinel lymph node biopsy plus axillary dissection		147.75.0	Nationwide Children's Hospital	TCGA-D8-A27L-D29591	53DEB285-A9E3-4877-A72F-64441D85E4F9	TCGA-D8-A27L-F29590	F7C1DB5B-81CE-49D1-89AE-3C672EAE8635				Positive					Positive	Modified Radical Mastectomy				NO	31	26			238	100	0						NO	adriamycin+cuclophosphamide	manual counting		0B82F6FD-A49A-4CBA-8654-76F5F2070EEC		Scheduled Follow-up Submission
TCGA-A2-A0YF-01A					67	Right		Sentinel node biopsy alone		74.87.0	Nationwide Children's Hospital	TCGA-A2-A0YF-D5507	481c8460-6527-43a9-a403-f39ee68057e2	TCGA-A2-A0YF-F59385	AEE7A858-E746-4B8D-85F5-75D4F0F185F9				Positive		0			Negative	Simple Mastectomy				YES	31	12					0							Arimidex		90-99%	E4D9AC49-55D7-41D9-BA38-9EE0D98FD793		Scheduled Follow-up Submission
TCGA-A2-A0D2-01A					45	Left Lower Outer Quadrant	Regional site	Sentinel node biopsy alone		56.90.0	Nationwide Children's Hospital	TCGA-A2-A0D2-D1823	956680fa-6dc8-437e-8529-32d884b2e572	TCGA-A2-A0D2-F14458	76B9C470-A143-4376-92CB-58317C2C3764	TCGA-A2-A0D2-R70743	12036BDE-8D83-40CA-AA13-7AFEFCF03DD5		Negative		0			Negative	Simple Mastectomy				YES	31	9			123	74	0				270	230		Cytoxan		<10%	1053E2B4-096E-4E25-B146-57280076DFF2		Scheduled Follow-up Submission
TCGA-E9-A1R4-01A					66	Left Upper Outer Quadrant	Primary Tumor Field	Axillary lymph node dissection alone		120.76.0	Nationwide Children's Hospital	TCGA-E9-A1R4-D30536	8102DE2B-8388-4BD3-8699-A8575DAE40A4	TCGA-E9-A1R4-F48699	F48BBDBA-2E52-4977-B5C5-4644216DD354	TCGA-E9-A1R4-R30543	831EC698-4241-43B9-B8DD-2281430ED0B2											1	NO	31	19			45	9	0				155	125	NO	Cyclophosphamide			5FBFF516-9A81-44C5-A58C-FC08D49C883F		Scheduled Follow-up Submission
TCGA-D8-A1XS-01A					48	Left Upper Outer Quadrant	Primary Tumor Field	Axillary lymph node dissection alone		124.80.0	Nationwide Children's Hospital	TCGA-D8-A1XS-D29452	72D7E95D-A251-492A-ABBC-D296BC9871D3	TCGA-D8-A1XS-F12133	49FAF5EE-952C-4CBB-A2EF-E2E972F20185	TCGA-D8-A1XS-R29453	8FF615B0-8A31-4C2E-8FC3-C90949FBBD97		Positive					Positive	Modified Radical Mastectomy				NO	31	19			548	85	0				258	218	NO	adriamycin+cyclophosphamide	% IHC		D72E201B-BA9C-458B-974C-6D41E0DD68C0		Scheduled Follow-up Submission
TCGA-AR-A251-01A					51	Left Upper Outer Quadrant	Primary Tumor Field	Sentinel lymph node biopsy plus axillary dissection		142.78.0	Nationwide Children's Hospital	TCGA-AR-A251-D31828	96941235-258D-4BEE-85A3-8CFDAAAA042F	TCGA-AR-A251-F49509	796BE9A5-BB26-4986-8913-3657208A0538	TCGA-AR-A251-R31821	8995BFD6-45E6-4008-9BEE-8F0AA9E64948	Negative	Positive				Mastectomy NOS	Negative	Other			1		31	2			1969	175	0				195	160		Tamoxifen			CCD20527-385C-49E7-A803-AB0FB5128575		Scheduled Follow-up Submission
TCGA-C8-A275-01A					56	Left Upper Outer Quadrant				147.75.0	Nationwide Children's Hospital														Other					31	21					0										AD87DE1D-2328-4A83-A503-2C3B522D9B0F
TCGA-AR-A1AP-01A					80	Left Upper Outer Quadrant		Sentinel lymph node biopsy plus axillary dissection		96.78.0	Nationwide Children's Hospital	TCGA-AR-A1AP-D21795	89F5BA7B-C2F4-41AC-84D2-4EC2FC5D6F02	TCGA-AR-A1AP-F69275	7F6FFB16-466B-42BB-BFB6-05059B1C63F7			Negative	Positive				Mastectomy NOS	Positive	Other				YES	31	31				29	0							Anastrozole		70-79%	31508AAC-B518-4ABF-8DA9-A1A3F3F37A9D		Scheduled Follow-up Submission
TCGA-A8-A082-01A					58	Right				47.97.0	Nationwide Children's Hospital	TCGA-A8-A082-D37892	03AE2E15-1D31-4DAD-8D42-434C2FF4769A	TCGA-A8-A082-F40837	94671AF3-7174-4E0B-9B56-33FFE891B86F				Positive					Positive	Other					31	2			914	852	0							Exemestane			CDAC67C5-66B5-4F57-B722-5B0445957D58
TCGA-AC-A3YI-01A					74	Right	Primary Tumor Field	Sentinel lymph node biopsy plus axillary dissection		239.55.0	Nationwide Children's Hospital	TCGA-AC-A3YI-D61516	710B0219-323F-4EF2-A310-54559049BEDB	TCGA-AC-A3YI-F61513	7CA1E88A-71BA-41EA-9D4F-88DAF4FDBF8D	TCGA-AC-A3YI-R61517	F847AE09-DB60-4729-9889-41EF61CD8482		Positive					Positive	Lumpectomy				NO	31	30			167	82	0				297	250		5-FU		90-99%	6087B436-AE8E-406F-A2C2-6D749555599E
TCGA-AR-A24S-01A					61	Right Lower Outer Quadrant	Primary Tumor Field	Sentinel lymph node biopsy plus axillary dissection		142.78.0	Nationwide Children's Hospital	TCGA-AR-A24S-D31499	F328D456-9B78-4357-99E0-40F41C3314CE	TCGA-AR-A24S-F31496	C02A0731-B37F-4A25-87C8-C4BAE202D900	TCGA-AR-A24S-R31497	6158469F-BAE7-4222-BAF2-A95FF4534F27		Positive					Positive	Other			1	YES	31	4			126	32	0				62	55		Anastrozole		70-79%	E8D5A431-F702-460E-A9DD-0789B9F7BAAA		Scheduled Follow-up Submission
TCGA-A2-A3Y0-01A					57	Left Upper Outer Quadrant		Axillary lymph node dissection alone		239.55.0	Nationwide Children's Hospital	TCGA-A2-A3Y0-D34590	7CD22268-A875-4227-AB7F-E16930C56DDC	TCGA-A2-A3Y0-F43305	F0E5AA9E-2FA1-4CB2-A39C-EEFDECF50948				Positive	3 Point Scale				Negative	Modified Radical Mastectomy				NO	31	16					0							Tamoxifen		90-99%	3FB3065C-4F22-4CFF-B2B6-69833E7B6B19
TCGA-BH-A0RX-01A		YES			59	Left		Sentinel node biopsy alone		72.90.0	Nationwide Children's Hospital	TCGA-BH-A0RX-D4873	5D132A06-F3D4-4E01-ACBA-37EBA9BACD22	TCGA-BH-A0RX-F4875	4CFEECD1-12BC-496C-9B8E-2E006F072A1E										Other				NO	31	16			155	50	0							Fluorouracil			6E755BF0-37E1-450D-BAEC-AA8EDCABA51D
TCGA-A2-A0ST-01A					62	Right Upper Outer Quadrant	Primary Tumor Field	Sentinel lymph node biopsy plus axillary dissection		72.90.0	Nationwide Children's Hospital	TCGA-A2-A0ST-D3717	47ecba15-fb35-479e-beaa-92b787d0d2c6	TCGA-A2-A0ST-F14035	6E01D82D-BA83-4093-9E7A-387715D2F3A5	TCGA-A2-A0ST-R70359	793704FD-D7A0-4911-AC99-9ACD0E500467		Negative					Negative	Lumpectomy				YES	31	14			85	44	0				240	236		Cytoxan			E521E8EF-6B3A-481A-857B-59392FCF875D		Scheduled Follow-up Submission
TCGA-A8-A06P-01A					63	Right	Primary Tumor Field			47.97.0	Nationwide Children's Hospital	TCGA-A8-A06P-D37895	31453368-BCF6-42B5-AAC7-78DADCD6A50B	TCGA-A8-A06P-F40814	F2C11286-6956-4C14-9C00-EE235CF900A8	TCGA-A8-A06P-R38190	32B9AD47-AE11-4A7B-B3A9-67D64A1A732F		Positive					Positive	Other					31	2					0							Tamoxifen			5D394FC4-B0AF-4863-BAEF-ADECE8411567
TCGA-D8-A1XT-01A					61	Right Upper Outer Quadrant		Axillary lymph node dissection alone		124.80.0	Nationwide Children's Hospital	TCGA-D8-A1XT-D29455	BA9F76EC-158B-4252-8921-AF7A7755CEAB	TCGA-D8-A1XT-F29454	1DBB325B-97FD-4160-A1DB-1849297B9592				Negative					Negative	Modified Radical Mastectomy				NO	31	26			228	74	0						NO	adriamycin+cyclophosphamide	% IHC		B2C535BD-C42B-439C-809E-861F03BE0AE8		Scheduled Follow-up Submission
TCGA-AC-A4ZE-01A					63	Right Lower Outer Quadrant		Sentinel node biopsy alone		379.34.0	Nationwide Children's Hospital			TCGA-AC-A4ZE-F72379	93BEFC77-D0BC-4528-A5D1-3774D3341331				Positive					Positive	Simple Mastectomy				NO	31	9					0										52450D9F-47D2-4031-9850-40C54C6C1576
TCGA-C8-A12U-01A					46	Right		Axillary lymph node dissection alone		85.85.0	Nationwide Children's Hospital			TCGA-C8-A12U-F20249	06835152-B8AC-4FE9-A8E6-873E5B07FD48				Positive					Positive	Other					31	9					0						NO				09F95F42-4420-450E-8FDE-96BEC41D86FC		Scheduled Follow-up Submission
TCGA-XX-A89A-01A					68	Left Upper Outer Quadrant	Regional site			372.39.0	Nationwide Children's Hospital			TCGA-XX-A89A-F67425	1807302C-1D1D-4F80-82EE-65C4D14723B7	TCGA-XX-A89A-R67428	2D465698-646A-4347-BBC1-1C97FF34D940		Positive					Positive	Simple Mastectomy					31	11					0				112	59				70-79%	F0539DAA-DCA7-4172-800A-7A07C8963443
TCGA-E9-A1N8-01A					48	Right Upper Outer Quadrant		Axillary lymph node dissection alone		117.78.0	Nationwide Children's Hospital	TCGA-E9-A1N8-D29138	6D5C845C-F385-41B2-ABCB-2CC309BAA5DF	TCGA-E9-A1N8-F53518	F4D07D12-E2E7-45AA-A24F-D15D9A955DF7				Negative										NO	31	12			107	22	0						NO	Cyclophosphane			43538D9E-D76E-4A3D-BD21-260E86056616		Scheduled Follow-up Submission
TCGA-E9-A1N8-11A					48	Right Upper Outer Quadrant		Axillary lymph node dissection alone		117.78.0	Nationwide Children's Hospital	TCGA-E9-A1N8-D29138	6D5C845C-F385-41B2-ABCB-2CC309BAA5DF	TCGA-E9-A1N8-F53518	F4D07D12-E2E7-45AA-A24F-D15D9A955DF7				Negative										NO	31	12			107	22	0						NO	Cyclophosphane			43538D9E-D76E-4A3D-BD21-260E86056616		Scheduled Follow-up Submission
TCGA-AN-A0XL-01A					61	Left Upper Outer Quadrant				80.83.0	Nationwide Children's Hospital			TCGA-AN-A0XL-F68955	3060F448-5814-4CF8-B2CF-AB1B70F1098B				Positive					Positive						31	23					0						NO				6433D895-2B79-4D9D-9BC1-17B846F90A90
TCGA-BH-A18L-01A					50	Left Upper Outer Quadrant		Sentinel node biopsy alone		93.85.0	Nationwide Children's Hospital								Positive					Positive	Other					31	9					0						NO				E5F45082-B950-448C-A2AA-26D7F50865B2
TCGA-BH-A18L-11A					50	Left Upper Outer Quadrant		Sentinel node biopsy alone		93.85.0	Nationwide Children's Hospital								Positive					Positive	Other					31	9					0						NO				E5F45082-B950-448C-A2AA-26D7F50865B2
TCGA-AN-A0G0-01A					56	Right Upper Inner Quadrant		No axillary staging		56.90.0	Nationwide Children's Hospital			TCGA-AN-A0G0-F68970	15A83D83-B3D3-45E7-8262-3E6CDC4B1C5D				Negative					Negative	Modified Radical Mastectomy				NO	31	24					0										C3F94B2E-4A10-4EE4-8458-459E4A9A7483
TCGA-BH-A18Q-01A					56	Left		Axillary lymph node dissection alone		93.85.0	Nationwide Children's Hospital								Negative					Negative	Modified Radical Mastectomy					31	24					0										1E7476B8-2D9B-4178-9055-8F20F0DA4DE2
TCGA-BH-A18Q-11A					56	Left		Axillary lymph node dissection alone		93.85.0	Nationwide Children's Hospital								Negative					Negative	Modified Radical Mastectomy					31	24					0										1E7476B8-2D9B-4178-9055-8F20F0DA4DE2
TCGA-GM-A2DA-01A	NO	YES			46	Right Upper Outer Quadrant	Distant Recurrence	Axillary lymph node dissection alone		177.73.0	Nationwide Children's Hospital	TCGA-GM-A2DA-D47241	EEBDC3B3-BCF1-4629-9C08-8129305599B7	TCGA-GM-A2DA-F47040	1FE24E96-5D31-480A-9AA9-C2702EE3ABAF	TCGA-GM-A2DA-R47205	0E0EB0C4-1A13-47AF-BBA6-45B73E378A4E		Positive					Positive	Modified Radical Mastectomy				NO	31	21			6536	6372	0			6536	6552	6538	YES	Herceptin		90-99%	EE4084F1-0802-4641-8406-96775155CBCB	3.70
TCGA-UU-A93S-01A					63	Right Lower Outer Quadrant		No axillary staging		379.34.0	Nationwide Children's Hospital								Negative					Negative	Modified Radical Mastectomy				YES	31	11					0										26A26480-8417-4AC1-98AE-9E903B098997
TCGA-E2-A14R-01A	NO	YES	YES		62	Left	Primary Tumor Field	Sentinel lymph node biopsy plus axillary dissection		85.85.0	Nationwide Children's Hospital	TCGA-E2-A14R-D18839	1F3203CD-3D0A-40D3-95B5-5B07E4987795	TCGA-E2-A14R-F18838	818079A8-A928-4AC6-9779-E8A587D960DB	TCGA-E2-A14R-R18843	71319FB6-5CE9-4A19-8D5C-34C64A295435		Negative					Negative	Lumpectomy			1	NO	31	24		971	131	89	0			971	259	210	NO	Cyclophosphamide	Allred score 0+0 = 0		3954DB73-C492-4830-B53D-B39D2E04B282		Scheduled Follow-up Submission
TCGA-D8-A1JL-01A					72	Left Lower Inner Quadrant		Axillary lymph node dissection alone		109.88.0	Nationwide Children's Hospital			TCGA-D8-A1JL-F20747	DCA53598-A604-4C2E-BC24-67A6AD8B8D49				Negative					Negative	Modified Radical Mastectomy					31	15					0								manual counting		2C1B423F-F8F3-4D01-B423-0103DA1EB8A1		Scheduled Follow-up Submission
TCGA-BH-A0B4-01A					65	Left		Axillary lymph node dissection alone		47.97.0	Nationwide Children's Hospital	TCGA-BH-A0B4-D15437	E2E65D25-78D3-4CEC-B111-4B60F152B128	TCGA-BH-A0B4-F15435	AE2D2C86-0F6F-4CD9-9D52-361A471B6676				Positive		3+			Positive	Modified Radical Mastectomy				NO	31	4				211	0							Tamoxifen		80-89%	EF81CE61-A518-4963-BAF7-33439CD53EA2	2.0	Scheduled Follow-up Submission
TCGA-C8-A12L-01A					67	Right		Axillary lymph node dissection alone		85.85.0	Nationwide Children's Hospital			TCGA-C8-A12L-F20258	9A790E77-B373-41E6-98DD-4520857BB46F				Negative					Negative	Other					31	9					0										43980DEE-09BA-4126-A9DF-C830DA159306		Scheduled Follow-up Submission
TCGA-D8-A142-01A					74	Left		Axillary lymph node dissection alone		85.85.0	Nationwide Children's Hospital	TCGA-D8-A142-D64908	3AB62920-B064-4CD7-9D3B-F002D10D66E5	TCGA-D8-A142-F13813	955192A4-D534-42D7-8A51-67D7446F1AE1				Negative					Negative	Modified Radical Mastectomy				NO	31	20			271	61	0							fluorouracil			9B456AAB-75D4-47AC-8117-86FF1E0A56D5		Scheduled Follow-up Submission
TCGA-A2-A4S1-01A					66	Right Upper Outer Quadrant	Primary Tumor Field	Sentinel node biopsy alone		271.56.0	Nationwide Children's Hospital			TCGA-A2-A4S1-F58925	67A3F1E4-5375-4437-89BD-6EF2EB2BCDCC	TCGA-A2-A4S1-R40671	8236A730-E0C4-4C4B-8DD0-EFD9FA7D81AC		Positive	3 Point Scale				Negative	Lumpectomy				YES	31	28					0				130	126				<10%	C1052D52-E484-406B-9335-94FB2400196B
TCGA-E9-A1NA-01A					58	Left Lower Outer Quadrant	Regional site	Axillary lymph node dissection alone		117.78.0	Nationwide Children's Hospital	TCGA-E9-A1NA-D32901	2D437D87-3612-4B26-B16A-AF426B729C67	TCGA-E9-A1NA-F39782	7D959C11-6F61-40A8-B8E3-A80F62DFE74A	TCGA-E9-A1NA-R29161	698F1492-8386-44E8-9271-29109BBA6FCC		Positive					Positive					YES	31	1				206	0				95	58	NO	Letrozole			12AF45BB-7628-41B5-B2FD-E3FDC5EB3CDD		Scheduled Follow-up Submission
TCGA-E9-A1NA-11A					58	Left Lower Outer Quadrant	Regional site	Axillary lymph node dissection alone		117.78.0	Nationwide Children's Hospital	TCGA-E9-A1NA-D32901	2D437D87-3612-4B26-B16A-AF426B729C67	TCGA-E9-A1NA-F39782	7D959C11-6F61-40A8-B8E3-A80F62DFE74A	TCGA-E9-A1NA-R29161	698F1492-8386-44E8-9271-29109BBA6FCC		Positive					Positive					YES	31	1				206	0				95	58	NO	Letrozole			12AF45BB-7628-41B5-B2FD-E3FDC5EB3CDD		Scheduled Follow-up Submission
TCGA-C8-A132-01A					56	Left		Axillary lymph node dissection alone		85.85.0	Nationwide Children's Hospital			TCGA-C8-A132-F70826	9BDF73D9-8363-4F50-92EC-41537B282632				Positive					Positive	Other					31	9					0						NO				E4088AAE-4996-4CB4-8C34-C05C6CF17E82		Scheduled Follow-up Submission
TCGA-E9-A3Q9-01A					78	Right Lower Inner Quadrant		Axillary lymph node dissection alone		216.63.0	Nationwide Children's Hospital	TCGA-E9-A3Q9-D40594	8925146E-CA92-4C23-9610-AA8FAADEC1D3	TCGA-E9-A3Q9-F40589	685D54DA-6242-4E70-A7EA-0C22A6BA84B3				Positive					Positive					YES	31	25				108	0						NO	Tamoxifen		40-49%	E21F8429-3811-4AFF-A6D2-9FF195FC22C0
TCGA-E9-A6HE-01A					45	Right	Primary Tumor Field	Sentinel lymph node biopsy plus axillary dissection		322.49.0	Nationwide Children's Hospital	TCGA-E9-A6HE-D70948	841B570D-BF43-46C2-BA09-48D7F7A17424	TCGA-E9-A6HE-F56813	04C878A3-833B-4620-BFE5-089365972076	TCGA-E9-A6HE-R56817	35448ACB-8809-472B-873C-7B257ECB579D		Positive					Positive	Simple Mastectomy				NO	31	24				547	0				299	259		Tamoxifen		90-99%	1019DE29-EBC4-48A3-8ADA-462C94148945	1.7
TCGA-B6-A0IH-01A					81	Left		Axillary lymph node dissection alone		85.85.0	Nationwide Children's Hospital			TCGA-B6-A0IH-F12617	A5FE44D8-EFB4-473A-B201-4E3502C030D9			Negative	Positive				Modified radical mastectomy	Positive	Other				NO	31	2					0								Image Analysis		239F681B-C814-4128-90A0-B9CD30FB5CD4		Scheduled Follow-up Submission
TCGA-EW-A1PA-01A					59	Left Upper Outer Quadrant	Primary Tumor Field	Axillary lymph node dissection alone		117.78.0	Nationwide Children's Hospital	TCGA-EW-A1PA-D30941	5D03E3B4-4612-47BD-8BD5-9BCC599F8B5C	TCGA-EW-A1PA-F30937	E558B7BC-59D7-435C-8ADA-7B2B8B280FBE	TCGA-EW-A1PA-R30947	7EF75334-1718-4EDB-A178-B2E9D80D8952		Positive	3 Point Scale	3+	3 Point Scale		Positive	Lumpectomy			1	NO	31	8			206	143	0				262	225	NO	Epirubicin		90-99%	C00505CB-16B0-4E35-9807-ADC5425A69B7		Scheduled Follow-up Submission
TCGA-A1-A0SK-01A					54	Right Upper Outer Quadrant		Sentinel lymph node biopsy plus axillary dissection		72.90.0	Nationwide Children's Hospital			TCGA-A1-A0SK-F15926	5F98C53B-5EE8-444C-9089-1E7EF433117D			Negative	Negative				Other	Negative	Lumpectomy	surgical resection				31	7					0										5F5C9D17-AD8F-4FCE-A0FA-4AFF27699793		Scheduled Follow-up Submission
TCGA-GM-A5PX-01A					65	Left		Sentinel lymph node biopsy plus axillary dissection		296.54.0	Nationwide Children's Hospital	TCGA-GM-A5PX-D42163	2713B9D0-0CB9-4FD7-B75B-3ED4DEC296C4						Positive					Positive	Simple Mastectomy				YES	31	12				340	0							Tamoxifen		90-99%	52CDFF13-BC0F-48DA-AF94-6D6D15206C9C	1.78
TCGA-BH-A1EN-01A					78	Right				109.88.0	Nationwide Children's Hospital								Negative					Negative	Other					31	3					0						NO				D8CF0278-5AA4-4517-B0E6-354867D8693A
TCGA-BH-A1EN-11A					78	Right				109.88.0	Nationwide Children's Hospital								Negative					Negative	Other					31	3					0						NO				D8CF0278-5AA4-4517-B0E6-354867D8693A
TCGA-E2-A105-01A					79	Left Upper Inner Quadrant	Primary Tumor Field	Sentinel node biopsy alone		80.83.0	Nationwide Children's Hospital	TCGA-E2-A105-D7696	e88c01a6-d3d9-48bf-8e5e-929c0c0c7d9a	TCGA-E2-A105-F17431	98CF51C1-3D09-49B5-A0F2-BD06DB419082	TCGA-E2-A105-R7695	686c1c4e-ee34-4e9d-adfb-82306b6becf2		Positive					Positive	Lumpectomy			1	NO	31	9				65	0				122	61		Arimidex	Allred score 3 + 2 = 5		926ABB7E-B749-441C-820D-DCA6618490BC		Scheduled Follow-up Submission
TCGA-AN-A0AR-01A					55	Right Upper Inner Quadrant		No axillary staging		47.97.0	Nationwide Children's Hospital			TCGA-AN-A0AR-F68946	07FE1A95-D842-4DF8-9EAA-36D34C7989DD				Negative		0			Negative	Modified Radical Mastectomy				NO	31	23					0										B86F8199-4EC8-4589-B51C-C845366B93B8
TCGA-B6-A0X5-01A	NO	NO	NO		61	Left		Axillary lymph node dissection alone		74.87.0	Nationwide Children's Hospital			TCGA-B6-A0X5-F15726	51D5C754-2AD5-4C88-9D30-FB526027E827				Positive					Positive	Modified Radical Mastectomy				NO	31	29					0			1343					Image Analysis		DEE1B5D8-BA39-42FD-B458-780D6AD4E30D		Scheduled Follow-up Submission
TCGA-GM-A2DO-01A					54	Right Upper Outer Quadrant	Primary Tumor Field	Sentinel node biopsy alone		177.73.0	Nationwide Children's Hospital	TCGA-GM-A2DO-D47154	C19E8E9F-4856-4D78-8214-60750D868B76	TCGA-GM-A2DO-F47151	5EAB98B3-F7DE-4F1B-89A0-346CBBA6049E	TCGA-GM-A2DO-R47153	F35B749C-7FAE-4842-BE1A-15F2C44A28D1		Positive					Positive	Lumpectomy				YES	31	22			2051	219	0				218	176	NO	Tamoxifen		90-99%	B0EE9ABA-86CC-4983-818A-60B3A6DBE120
TCGA-A2-A0CV-01A					41	Left Lower Outer Quadrant	Primary Tumor Field	Axillary lymph node dissection alone		85.85.0	Nationwide Children's Hospital	TCGA-A2-A0CV-D7428	0fecbde9-3113-43c9-9873-5c3dc1c9158c	TCGA-A2-A0CV-F59321	70EFBD77-D291-4618-84F9-617087564F77	TCGA-A2-A0CV-R7434	ae409847-2014-463b-b89a-9b5c9ed32bb7		Positive					Positive	Modified Radical Mastectomy			1	NO	31	8			106	64	0				263	229		Adriamycin		90-99%	0933C292-6DA6-46E9-B694-C68D4B338F3F		Scheduled Follow-up Submission
TCGA-OL-A5D8-01A					40	Left Lower Outer Quadrant		Other (specify)	axillary ultrasound	288.54.0	Nationwide Children's Hospital			TCGA-OL-A5D8-F55438	85CD1C5F-D1D1-4A4D-B071-233563FA3D44				Positive					Positive	Simple Mastectomy				NO	31	10					0									90-99%	43824F43-C980-4252-8939-71BF4E698A04	2.25
TCGA-D8-A1JJ-01A					54	Right Upper Inner Quadrant	Regional site	Sentinel node biopsy alone		124.80.0	Nationwide Children's Hospital	TCGA-D8-A1JJ-D65328	FC68628D-E031-42D2-9D8F-4D34ACDEEC56	TCGA-D8-A1JJ-F20754	2586900A-76A7-44D0-9D02-828DF5F321CD	TCGA-D8-A1JJ-R20753	765626E2-B396-481B-8720-E2A148CA748A		Positive					Positive	Other					31	19			143	137	0				207	189		cyclophosphamide	manual counting		190A7F28-241E-49F4-86C7-DE0BFF19ECF4		Scheduled Follow-up Submission
TCGA-A2-A0YC-01A	YES	NO	YES		59	Right Upper Inner Quadrant	Primary Tumor Field	Other (specify)	Sentinel lymph node biopsy x 2 and 1 non-sentinel lymph node biopsy	74.87.0	Nationwide Children's Hospital	TCGA-A2-A0YC-D5677	0c6ae6c0-6396-40ca-8f21-e1d33a8e9ad0	TCGA-A2-A0YC-F15845	C96EBF68-77B8-4D7E-B54F-B4ACDA34E1BB	TCGA-A2-A0YC-R5678	f101ee98-6a56-48fc-9688-d737171c8f34		Positive					Positive	Lumpectomy			1	YES	31	30		756		103	0			756	78	71		Arimidex		90-99%	2D04E786-23B9-4E92-B3A2-F2E28673C9C0		Scheduled Follow-up Submission
TCGA-E9-A1NH-01A					71	Left Upper Inner Quadrant		Axillary lymph node dissection alone		120.76.0	Nationwide Children's Hospital	TCGA-E9-A1NH-D35054	23703F4A-C80E-4EF7-BB6D-673805FC8899	TCGA-E9-A1NH-F35049	6610DD91-CA89-400B-83F5-1B08AEADAF1A				Positive					Positive	Modified Radical Mastectomy				YES	31	14				33	0						NO	Tamoxifen			3C018938-9B75-44FC-8B3A-A7853A7BAC13
TCGA-E9-A1NH-11A					71	Left Upper Inner Quadrant		Axillary lymph node dissection alone		120.76.0	Nationwide Children's Hospital	TCGA-E9-A1NH-D35054	23703F4A-C80E-4EF7-BB6D-673805FC8899	TCGA-E9-A1NH-F35049	6610DD91-CA89-400B-83F5-1B08AEADAF1A				Positive					Positive	Modified Radical Mastectomy				YES	31	14				33	0						NO	Tamoxifen			3C018938-9B75-44FC-8B3A-A7853A7BAC13
TCGA-A2-A0T0-01A					59	Left Lower Outer Quadrant	Primary Tumor Field	Axillary lymph node dissection alone		72.90.0	Nationwide Children's Hospital	TCGA-A2-A0T0-D3434	d86d4e6c-4305-493c-b8bf-968971f358c9	TCGA-A2-A0T0-F13944	B0DC7631-8558-431C-B56D-B8C9C74C29F5	TCGA-A2-A0T0-R3435	216a63e4-215a-4fc7-a5ea-e50076307b40		Negative					Negative	Lumpectomy			1	NO	31	18			234	50	0				323	262		Cytoxan		<10%	4570B573-F0DE-41B2-AA91-DE142F843B12		Scheduled Follow-up Submission
[truncated: 247 more rows]
[truncated: 137 more columns]
