# Supplementary material for: Autophagy-related prognostic signature for survival prediction of triple negative breast cancer
Source: PeerJ journal article supplement (doi:10.7717/peerj.12878), 2022-02-09
Supplement: Raw_data.zip [file TCGA-BRCA.survival.xls]

sample	_EVENT	_PATIENT	_TIME_TO_EVENT	_OS_IND	_OS
TCGA-A8-A082-01A	0	TCGA-A8-A082	-31	0	-31
TCGA-PL-A8LV-01A	0	TCGA-PL-A8LV	-7	0	-7
TCGA-C8-A275-01A	0	TCGA-C8-A275	1	0	1
TCGA-AC-A7VC-01A	0	TCGA-AC-A7VC	1	0	1
TCGA-AN-A0AM-01A	0	TCGA-AN-A0AM	5	0	5
TCGA-C8-A1HJ-01A	0	TCGA-C8-A1HJ	5	0	5
TCGA-PL-A8LX-01A	0	TCGA-PL-A8LX	5	0	5
TCGA-AN-A041-01A	0	TCGA-AN-A041	7	0	7
TCGA-PL-A8LY-01A	0	TCGA-PL-A8LY	8	0	8
TCGA-AN-A0XP-01A	0	TCGA-AN-A0XP	9	0	9
TCGA-AN-A03X-01A	0	TCGA-AN-A03X	10	0	10
TCGA-AN-A0AR-01A	0	TCGA-AN-A0AR	10	0	10
TCGA-AN-A0AT-01A	0	TCGA-AN-A0AT	10	0	10
TCGA-AN-A046-01A	0	TCGA-AN-A046	10	0	10
TCGA-AN-A0AS-01A	0	TCGA-AN-A0AS	10	0	10
TCGA-AN-A0XT-01A	0	TCGA-AN-A0XT	10	0	10
TCGA-AN-A03Y-01A	0	TCGA-AN-A03Y	10	0	10
TCGA-AN-A0FZ-01A	0	TCGA-AN-A0FZ	10	0	10
TCGA-AN-A0FY-01A	0	TCGA-AN-A0FY	10	0	10
TCGA-AN-A0XN-01A	0	TCGA-AN-A0XN	10	0	10
TCGA-AN-A0XR-01A	0	TCGA-AN-A0XR	10	0	10
TCGA-AN-A0FX-01A	0	TCGA-AN-A0FX	10	0	10
TCGA-AN-A0XS-01A	0	TCGA-AN-A0XS	10	0	10
TCGA-AN-A0XU-01A	0	TCGA-AN-A0XU	10	0	10
TCGA-AN-A0FV-01A	0	TCGA-AN-A0FV	10	0	10
TCGA-AN-A0FW-01A	0	TCGA-AN-A0FW	11	0	11
TCGA-AN-A0G0-01A	0	TCGA-AN-A0G0	16	0	16
TCGA-AN-A049-01A	0	TCGA-AN-A049	19	0	19
TCGA-E9-A244-01A	0	TCGA-E9-A244	21	0	21
TCGA-E9-A5FL-01A	0	TCGA-E9-A5FL	24	0	24
TCGA-E9-A245-01A	1	TCGA-E9-A245	26	1	26
TCGA-A8-A08A-01A	0	TCGA-A8-A08A	30	0	30
TCGA-A8-A08R-01A	0	TCGA-A8-A08R	30	0	30
TCGA-A8-A0A7-01A	0	TCGA-A8-A0A7	30	0	30
TCGA-A8-A09W-01A	0	TCGA-A8-A09W	30	0	30
TCGA-A8-A09C-01A	0	TCGA-A8-A09C	31	0	31
TCGA-A8-A09N-01A	0	TCGA-A8-A09N	31	0	31
TCGA-A8-A06Q-01A	0	TCGA-A8-A06Q	31	0	31
TCGA-A8-A06Z-01A	0	TCGA-A8-A06Z	31	0	31
TCGA-AC-A8OQ-01A	0	TCGA-AC-A8OQ	34	0	34
TCGA-E9-A1RD-11A	0	TCGA-E9-A1RD	34	0	34
TCGA-E9-A1RD-01A	0	TCGA-E9-A1RD	34	0	34
TCGA-AC-A8OR-01A	0	TCGA-AC-A8OR	40	0	40
TCGA-D8-A27P-01A	0	TCGA-D8-A27P	49	0	49
TCGA-AC-A6NO-01A	0	TCGA-AC-A6NO	51	0	51
TCGA-AN-A04D-01A	0	TCGA-AN-A04D	52	0	52
TCGA-AN-A04C-01A	0	TCGA-AN-A04C	54	0	54
TCGA-E9-A248-01A	0	TCGA-E9-A248	59	0	59
TCGA-OK-A5Q2-01A	0	TCGA-OK-A5Q2	64	0	64
TCGA-AC-A8OS-01A	0	TCGA-AC-A8OS	70	0	70
TCGA-BH-A0HL-01A	0	TCGA-BH-A0HL	72	0	72
TCGA-BH-A0HO-01A	0	TCGA-BH-A0HO	76	0	76
TCGA-BH-A0DS-01A	0	TCGA-BH-A0DS	78	0	78
TCGA-AQ-A54N-01A	0	TCGA-AQ-A54N	78	0	78
TCGA-E9-A1R3-01A	0	TCGA-E9-A1R3	78	0	78
TCGA-HN-A2NL-01A	0	TCGA-HN-A2NL	79	0	79
TCGA-LL-A6FQ-01A	0	TCGA-LL-A6FQ	80	0	80
TCGA-AR-A24P-01A	0	TCGA-AR-A24P	84	0	84
TCGA-AN-A04A-01A	0	TCGA-AN-A04A	90	0	90
TCGA-E9-A1R5-01A	0	TCGA-E9-A1R5	92	0	92
TCGA-BH-A0DQ-11A	0	TCGA-BH-A0DQ	98	0	98
TCGA-BH-A0DQ-01A	0	TCGA-BH-A0DQ	98	0	98
TCGA-UU-A93S-01A	1	TCGA-UU-A93S	116	1	116
TCGA-E2-A1IL-01A	0	TCGA-E2-A1IL	118	0	118
TCGA-BH-A0E0-11A	0	TCGA-BH-A0E0	134	0	134
TCGA-BH-A0E0-01A	0	TCGA-BH-A0E0	134	0	134
TCGA-BH-A18G-01A	0	TCGA-BH-A18G	149	0	149
TCGA-A2-A0CU-01A	1	TCGA-A2-A0CU	158	1	158
TCGA-BH-A6R9-01A	0	TCGA-BH-A6R9	160	0	160
TCGA-AR-A0TR-01A	1	TCGA-AR-A0TR	160	1	160
TCGA-AN-A0XV-01A	0	TCGA-AN-A0XV	162	0	162
TCGA-AN-A0XL-01A	0	TCGA-AN-A0XL	163	0	163
TCGA-AN-A0XW-01A	0	TCGA-AN-A0XW	170	0	170
TCGA-BH-A0RX-01A	0	TCGA-BH-A0RX	170	0	170
TCGA-AN-A0FF-01A	0	TCGA-AN-A0FF	172	0	172
TCGA-AQ-A0Y5-01A	1	TCGA-AQ-A0Y5	172	1	172
TCGA-AC-A23H-11A	1	TCGA-AC-A23H	174	1	174
TCGA-AC-A23H-01A	1	TCGA-AC-A23H	174	1	174
TCGA-BH-A0HK-01A	0	TCGA-BH-A0HK	178	0	178
TCGA-BH-A0HK-11A	0	TCGA-BH-A0HK	178	0	178
TCGA-E9-A1R4-01A	0	TCGA-E9-A1R4	186	0	186
TCGA-EW-A1PC-01B	0	TCGA-EW-A1PC	187	0	187
TCGA-AN-A0FD-01A	0	TCGA-AN-A0FD	196	0	196
TCGA-AC-A3EH-11B	1	TCGA-AC-A3EH	197	1	197
TCGA-AC-A3EH-01A	1	TCGA-AC-A3EH	197	1	197
TCGA-E9-A1RF-11A	0	TCGA-E9-A1RF	200	0	200
TCGA-E9-A1RF-01A	0	TCGA-E9-A1RF	200	0	200
TCGA-AN-A0FS-01A	0	TCGA-AN-A0FS	210	0	210
TCGA-AN-A0FK-01A	0	TCGA-AN-A0FK	213	0	213
TCGA-AN-A0FT-01A	0	TCGA-AN-A0FT	214	0	214
TCGA-B6-A400-01A	0	TCGA-B6-A400	215	0	215
TCGA-LD-A7W5-01A	0	TCGA-LD-A7W5	216	0	216
TCGA-E9-A249-01A	0	TCGA-E9-A249	217	0	217
TCGA-AN-A0FN-01A	0	TCGA-AN-A0FN	218	0	218
TCGA-A2-A4RW-01A	0	TCGA-A2-A4RW	222	0	222
TCGA-BH-A18T-11A	1	TCGA-BH-A18T	224	1	224
TCGA-BH-A18T-01A	1	TCGA-BH-A18T	224	1	224
TCGA-AN-A0AK-01A	0	TCGA-AN-A0AK	224	0	224
TCGA-GI-A2C8-01A	0	TCGA-GI-A2C8	225	0	225
TCGA-GI-A2C8-11A	0	TCGA-GI-A2C8	225	0	225
TCGA-AN-A0AL-01A	0	TCGA-AN-A0AL	227	0	227
TCGA-LL-A73Z-01A	1	TCGA-LL-A73Z	227	1	227
TCGA-AN-A0FL-01A	0	TCGA-AN-A0FL	231	0	231
TCGA-EW-A1P8-01A	1	TCGA-EW-A1P8	239	1	239
TCGA-A1-A0SM-01A	0	TCGA-A1-A0SM	242	0	242
TCGA-AN-A0FJ-01A	0	TCGA-AN-A0FJ	242	0	242
TCGA-A8-A07S-01A	0	TCGA-A8-A07S	243	0	243
TCGA-AC-A7VB-01A	0	TCGA-AC-A7VB	250	0	250
TCGA-E2-A56Z-01A	0	TCGA-E2-A56Z	252	0	252
TCGA-A2-A0T2-01A	1	TCGA-A2-A0T2	255	1	255
TCGA-EW-A1IY-01A	0	TCGA-EW-A1IY	258	0	258
TCGA-A1-A0SB-01A	0	TCGA-A1-A0SB	259	0	259
TCGA-E2-A1LK-11A	1	TCGA-E2-A1LK	266	1	266
TCGA-E2-A1LK-01A	1	TCGA-E2-A1LK	266	1	266
TCGA-A7-A6VY-01A	0	TCGA-A7-A6VY	266	0	266
TCGA-OL-A97C-01A	0	TCGA-OL-A97C	271	0	271
TCGA-A8-A07R-01A	0	TCGA-A8-A07R	273	0	273
TCGA-A8-A09R-01A	0	TCGA-A8-A09R	273	0	273
TCGA-A8-A079-01A	0	TCGA-A8-A079	274	0	274
TCGA-E2-A15K-11A	0	TCGA-E2-A15K	275	0	275
TCGA-E2-A15K-06A	0	TCGA-E2-A15K	275	0	275
TCGA-E2-A15K-01A	0	TCGA-E2-A15K	275	0	275
TCGA-A7-A6VW-01A	0	TCGA-A7-A6VW	285	0	285
TCGA-BH-AB28-11A	0	TCGA-BH-AB28	287	0	287
TCGA-BH-AB28-01A	0	TCGA-BH-AB28	287	0	287
TCGA-E9-A2JT-01A	0	TCGA-E9-A2JT	288	0	288
TCGA-BH-A6R8-01A	0	TCGA-BH-A6R8	293	0	293
TCGA-BH-A0E6-01A	0	TCGA-BH-A0E6	293	0	293
TCGA-BH-A8FY-01A	1	TCGA-BH-A8FY	295	1	295
TCGA-C8-A278-01A	0	TCGA-C8-A278	297	0	297
TCGA-E9-A1NI-01A	0	TCGA-E9-A1NI	300	0	300
TCGA-D8-A1Y1-01A	1	TCGA-D8-A1Y1	302	1	302
TCGA-PL-A8LZ-01A	0	TCGA-PL-A8LZ	302	0	302
TCGA-AN-A0AJ-01A	0	TCGA-AN-A0AJ	303	0	303
TCGA-5T-A9QA-01A	0	TCGA-5T-A9QA	303	0	303
TCGA-A8-A08L-01A	1	TCGA-A8-A08L	304	1	304
TCGA-A8-A07O-01A	0	TCGA-A8-A07O	304	0	304
TCGA-A8-A099-01A	0	TCGA-A8-A099	304	0	304
TCGA-A8-A09A-01A	0	TCGA-A8-A09A	304	0	304
TCGA-A8-A07W-01A	0	TCGA-A8-A07W	304	0	304
TCGA-D8-A27R-01A	0	TCGA-D8-A27R	307	0	307
TCGA-A7-A3J0-01A	0	TCGA-A7-A3J0	313	0	313
TCGA-A7-A6VV-01A	0	TCGA-A7-A6VV	313	0	313
TCGA-A7-A6VX-01A	0	TCGA-A7-A6VX	317	0	317
TCGA-C8-A1HL-01A	0	TCGA-C8-A1HL	317	0	317
TCGA-EW-A1PE-01A	0	TCGA-EW-A1PE	320	0	320
TCGA-BH-A42T-01A	1	TCGA-BH-A42T	320	1	320
TCGA-A7-A3IZ-01A	0	TCGA-A7-A3IZ	322	0	322
TCGA-A2-A25F-01A	0	TCGA-A2-A25F	322	0	322
TCGA-AR-A5QQ-01A	1	TCGA-AR-A5QQ	322	1	322
TCGA-LD-A9QF-01A	0	TCGA-LD-A9QF	323	0	323
TCGA-A7-A5ZW-01A	0	TCGA-A7-A5ZW	326	0	326
TCGA-BH-A0GZ-01A	0	TCGA-BH-A0GZ	328	0	328
TCGA-C8-A1HF-01A	0	TCGA-C8-A1HF	332	0	332
TCGA-A8-A07P-01A	0	TCGA-A8-A07P	334	0	334
TCGA-A7-A5ZX-11A	0	TCGA-A7-A5ZX	336	0	336
TCGA-A7-A5ZX-01A	0	TCGA-A7-A5ZX	336	0	336
TCGA-E2-A15M-01A	1	TCGA-E2-A15M	336	1	336
TCGA-E2-A15M-11A	1	TCGA-E2-A15M	336	1	336
TCGA-E2-A1IU-11A	0	TCGA-E2-A1IU	337	0	337
TCGA-E2-A1IU-01A	0	TCGA-E2-A1IU	337	0	337
TCGA-E9-A1R6-01A	0	TCGA-E9-A1R6	339	0	339
TCGA-A7-A3J1-01A	0	TCGA-A7-A3J1	343	0	343
TCGA-C8-A1HI-01A	0	TCGA-C8-A1HI	343	0	343
TCGA-C8-A1HG-01A	0	TCGA-C8-A1HG	345	0	345
TCGA-A7-A3IY-01A	0	TCGA-A7-A3IY	345	0	345
TCGA-W8-A86G-01A	0	TCGA-W8-A86G	347	0	347
TCGA-AC-A62V-01A	1	TCGA-AC-A62V	348	1	348
TCGA-4H-AAAK-01A	0	TCGA-4H-AAAK	348	0	348
TCGA-AO-A1KS-01A	0	TCGA-AO-A1KS	350	0	350
TCGA-JL-A3YX-01A	0	TCGA-JL-A3YX	352	0	352
TCGA-C8-A12N-01A	0	TCGA-C8-A12N	358	0	358
TCGA-C8-A12M-01A	0	TCGA-C8-A12M	358	0	358
TCGA-C8-A12P-01A	0	TCGA-C8-A12P	358	0	358
TCGA-JL-A3YW-01A	0	TCGA-JL-A3YW	360	0	360
TCGA-B6-A0I9-01A	1	TCGA-B6-A0I9	362	1	362
TCGA-C8-A12L-01A	0	TCGA-C8-A12L	363	0	363
TCGA-A7-A426-01A	0	TCGA-A7-A426	364	0	364
TCGA-A8-A0A1-01A	0	TCGA-A8-A0A1	365	0	365
TCGA-A8-A07J-01A	0	TCGA-A8-A07J	365	0	365
TCGA-A8-A097-01A	0	TCGA-A8-A097	365	0	365
TCGA-A8-A09B-01A	0	TCGA-A8-A09B	365	0	365
TCGA-A8-A08I-01A	0	TCGA-A8-A08I	365	0	365
TCGA-BH-A1EV-11A	1	TCGA-BH-A1EV	365	1	365
TCGA-BH-A1EV-01A	1	TCGA-BH-A1EV	365	1	365
TCGA-D8-A1JF-01A	0	TCGA-D8-A1JF	366	0	366
TCGA-C8-A1HK-01A	0	TCGA-C8-A1HK	366	0	366
TCGA-A7-A5ZV-01A	0	TCGA-A7-A5ZV	368	0	368
TCGA-C8-A130-01A	0	TCGA-C8-A130	370	0	370
TCGA-EW-A1IW-01A	0	TCGA-EW-A1IW	371	0	371
TCGA-D8-A1JS-01A	0	TCGA-D8-A1JS	371	0	371
TCGA-D8-A27W-01A	0	TCGA-D8-A27W	373	0	373
TCGA-AC-A6IX-01A	0	TCGA-AC-A6IX	373	0	373
TCGA-AC-A6IX-06A	0	TCGA-AC-A6IX	373	0	373
TCGA-AN-A0XO-01A	0	TCGA-AN-A0XO	375	0	375
TCGA-C8-A1HE-01A	0	TCGA-C8-A1HE	375	0	375
TCGA-C8-A1HO-01A	0	TCGA-C8-A1HO	375	0	375
TCGA-E9-A295-01A	0	TCGA-E9-A295	375	0	375
TCGA-C8-A1HM-01A	0	TCGA-C8-A1HM	375	0	375
TCGA-C8-A26X-01A	0	TCGA-C8-A26X	376	0	376
TCGA-LL-A7T0-01A	0	TCGA-LL-A7T0	376	0	376
TCGA-D8-A1XC-01A	1	TCGA-D8-A1XC	377	1	377
TCGA-C8-A137-01A	0	TCGA-C8-A137	379	0	379
TCGA-C8-A138-01A	0	TCGA-C8-A138	380	0	380
TCGA-C8-A8HQ-01A	0	TCGA-C8-A8HQ	380	0	380
TCGA-C8-A26W-01A	0	TCGA-C8-A26W	381	0	381
TCGA-D8-A27V-01A	0	TCGA-D8-A27V	381	0	381
TCGA-C8-A12Z-01A	0	TCGA-C8-A12Z	382	0	382
TCGA-C8-A134-01A	0	TCGA-C8-A134	383	0	383
TCGA-C8-A132-01A	0	TCGA-C8-A132	383	0	383
TCGA-C8-A12X-01A	0	TCGA-C8-A12X	385	0	385
TCGA-C8-A12W-01A	0	TCGA-C8-A12W	385	0	385
TCGA-C8-A12O-01A	0	TCGA-C8-A12O	385	0	385
TCGA-C8-A12U-01A	0	TCGA-C8-A12U	385	0	385
TCGA-C8-A12Q-01A	1	TCGA-C8-A12Q	385	1	385
TCGA-D8-A73W-01A	1	TCGA-D8-A73W	385	1	385
TCGA-C8-A12V-01A	0	TCGA-C8-A12V	385	0	385
TCGA-BH-A0HU-01A	0	TCGA-BH-A0HU	392	0	392
TCGA-C8-A135-01A	0	TCGA-C8-A135	393	0	393
TCGA-E2-A15H-01A	0	TCGA-E2-A15H	393	0	393
TCGA-C8-A1HN-01A	0	TCGA-C8-A1HN	394	0	394
TCGA-C8-A3M8-01A	0	TCGA-C8-A3M8	394	0	394
TCGA-C8-A26Y-01A	0	TCGA-C8-A26Y	394	0	394
TCGA-D8-A1XU-01A	0	TCGA-D8-A1XU	395	0	395
TCGA-A8-A086-01A	0	TCGA-A8-A086	396	0	396
TCGA-C8-A8HP-01A	0	TCGA-C8-A8HP	396	0	396
TCGA-A8-A06O-01A	0	TCGA-A8-A06O	396	0	396
TCGA-A8-A06P-01A	0	TCGA-A8-A06P	396	0	396
TCGA-A8-A0A4-01A	0	TCGA-A8-A0A4	396	0	396
TCGA-D8-A27H-01A	0	TCGA-D8-A27H	397	0	397
TCGA-D8-A27T-01A	0	TCGA-D8-A27T	398	0	398
TCGA-LD-A74U-01A	0	TCGA-LD-A74U	402	0	402
TCGA-D8-A140-01A	0	TCGA-D8-A140	403	0	403
TCGA-EW-A1J2-01A	0	TCGA-EW-A1J2	403	0	403
TCGA-LD-A7W6-01A	0	TCGA-LD-A7W6	404	0	404
TCGA-D8-A1JT-01A	0	TCGA-D8-A1JT	405	0	405
TCGA-C8-A8HR-01A	0	TCGA-C8-A8HR	408	0	408
TCGA-A7-A3RF-01A	0	TCGA-A7-A3RF	408	0	408
TCGA-D8-A27G-01A	0	TCGA-D8-A27G	409	0	409
TCGA-D8-A27M-01A	0	TCGA-D8-A27M	410	0	410
TCGA-D8-A145-01A	0	TCGA-D8-A145	410	0	410
TCGA-C8-A131-01A	0	TCGA-C8-A131	411	0	411
TCGA-GM-A5PV-01A	0	TCGA-GM-A5PV	412	0	412
TCGA-AC-A6IW-01A	0	TCGA-AC-A6IW	413	0	413
TCGA-BH-A0HP-01A	0	TCGA-BH-A0HP	414	0	414
TCGA-A1-A0SJ-01A	0	TCGA-A1-A0SJ	416	0	416
TCGA-AC-A62X-01A	0	TCGA-AC-A62X	417	0	417
TCGA-A7-A4SB-01A	0	TCGA-A7-A4SB	418	0	418
TCGA-S3-AA11-01A	0	TCGA-S3-AA11	421	0	421
TCGA-BH-A0DK-11A	0	TCGA-BH-A0DK	423	0	423
TCGA-BH-A0DK-01A	0	TCGA-BH-A0DK	423	0	423
TCGA-S3-AA17-01A	0	TCGA-S3-AA17	424	0	424
TCGA-EW-A1PD-01A	0	TCGA-EW-A1PD	424	0	424
TCGA-D8-A142-01A	0	TCGA-D8-A142	425	0	425
TCGA-A8-A07I-01A	0	TCGA-A8-A07I	426	0	426
TCGA-D8-A1JH-01A	0	TCGA-D8-A1JH	426	0	426
TCGA-A8-A09X-01A	1	TCGA-A8-A09X	426	1	426
TCGA-E2-A15S-01A	0	TCGA-E2-A15S	428	0	428
TCGA-OL-A66P-01A	0	TCGA-OL-A66P	428	0	428
TCGA-D8-A1Y3-01A	0	TCGA-D8-A1Y3	430	0	430
TCGA-D8-A1J8-01A	0	TCGA-D8-A1J8	431	0	431
TCGA-D8-A143-01A	0	TCGA-D8-A143	431	0	431
TCGA-D8-A1Y2-01A	0	TCGA-D8-A1Y2	433	0	433
TCGA-A1-A0SG-01A	0	TCGA-A1-A0SG	434	0	434
TCGA-BH-A0E2-01A	0	TCGA-BH-A0E2	435	0	435
TCGA-A1-A0SD-01A	0	TCGA-A1-A0SD	437	0	437
TCGA-D8-A27I-01A	0	TCGA-D8-A27I	439	0	439
TCGA-EW-A1PF-01A	0	TCGA-EW-A1PF	439	0	439
TCGA-C8-A27B-01A	0	TCGA-C8-A27B	439	0	439
TCGA-LL-A5YO-01A	0	TCGA-LL-A5YO	440	0	440
TCGA-LL-A740-01A	0	TCGA-LL-A740	441	0	441
TCGA-D8-A1XK-01A	0	TCGA-D8-A1XK	441	0	441
TCGA-A7-A4SD-11A	0	TCGA-A7-A4SD	441	0	441
TCGA-A7-A4SD-01A	0	TCGA-A7-A4SD	441	0	441
TCGA-AC-A5EI-01A	0	TCGA-AC-A5EI	442	0	442
TCGA-A7-A4SC-01A	0	TCGA-A7-A4SC	446	0	446
TCGA-A7-A4SC-11A	0	TCGA-A7-A4SC	446	0	446
TCGA-AC-A2QJ-11A	1	TCGA-AC-A2QJ	446	1	446
TCGA-AC-A2QJ-01A	1	TCGA-AC-A2QJ	446	1	446
TCGA-LL-A5YN-01A	0	TCGA-LL-A5YN	447	0	447
TCGA-D8-A1JU-01A	0	TCGA-D8-A1JU	447	0	447
TCGA-A7-A425-01A	0	TCGA-A7-A425	447	0	447
TCGA-A7-A56D-11A	0	TCGA-A7-A56D	448	0	448
TCGA-A7-A56D-01A	0	TCGA-A7-A56D	448	0	448
TCGA-D8-A1XG-01A	0	TCGA-D8-A1XG	448	0	448
TCGA-LL-A5YP-01A	0	TCGA-LL-A5YP	450	0	450
TCGA-E2-A158-11A	0	TCGA-E2-A158	450	0	450
TCGA-E2-A158-01A	0	TCGA-E2-A158	450	0	450
TCGA-AC-A3OD-01A	0	TCGA-AC-A3OD	451	0	451
TCGA-AC-A3OD-01B	0	TCGA-AC-A3OD	451	0	451
TCGA-A7-A4SA-01A	0	TCGA-A7-A4SA	454	0	454
TCGA-A7-A4SA-11A	0	TCGA-A7-A4SA	454	0	454
TCGA-AC-A5XU-01A	0	TCGA-AC-A5XU	455	0	455
TCGA-AC-A3TN-01A	0	TCGA-AC-A3TN	456	0	456
TCGA-A8-A09V-01A	0	TCGA-A8-A09V	457	0	457
TCGA-A8-A084-01A	0	TCGA-A8-A084	458	0	458
TCGA-D8-A1XV-01A	0	TCGA-D8-A1XV	461	0	461
TCGA-BH-A0H0-01A	0	TCGA-BH-A0H0	461	0	461
TCGA-EW-A6S9-01A	0	TCGA-EW-A6S9	463	0	463
TCGA-D8-A1XF-01A	0	TCGA-D8-A1XF	463	0	463
TCGA-LL-A5YM-01A	0	TCGA-LL-A5YM	466	0	466
TCGA-D8-A1XZ-01A	0	TCGA-D8-A1XZ	466	0	466
TCGA-XX-A899-01A	0	TCGA-XX-A899	467	0	467
TCGA-XX-A899-11A	0	TCGA-XX-A899	467	0	467
TCGA-C8-A26Z-01A	0	TCGA-C8-A26Z	470	0	470
TCGA-AC-A3W7-01A	0	TCGA-AC-A3W7	471	0	471
TCGA-D8-A1Y0-01A	0	TCGA-D8-A1Y0	472	0	472
TCGA-AQ-A1H2-01A	0	TCGA-AQ-A1H2	475	0	475
TCGA-BH-A0DP-11A	0	TCGA-BH-A0DP	476	0	476
TCGA-BH-A0DP-01A	0	TCGA-BH-A0DP	476	0	476
TCGA-EW-A1J5-01A	0	TCGA-EW-A1J5	477	0	477
TCGA-BH-A0E1-11A	0	TCGA-BH-A0E1	477	0	477
TCGA-BH-A0E1-01A	0	TCGA-BH-A0E1	477	0	477
TCGA-LL-A73Y-01A	0	TCGA-LL-A73Y	477	0	477
TCGA-D8-A1JC-01A	0	TCGA-D8-A1JC	480	0	480
TCGA-D8-A1XR-01A	0	TCGA-D8-A1XR	482	0	482
TCGA-D8-A27F-01A	0	TCGA-D8-A27F	488	0	488
TCGA-XX-A89A-01A	0	TCGA-XX-A89A	488	0	488
TCGA-LL-A6FR-01A	0	TCGA-LL-A6FR	489	0	489
TCGA-D8-A73U-01A	0	TCGA-D8-A73U	492	0	492
TCGA-BH-A0DZ-11A	0	TCGA-BH-A0DZ	495	0	495
TCGA-BH-A0DZ-01A	0	TCGA-BH-A0DZ	495	0	495
TCGA-D8-A1XS-01A	0	TCGA-D8-A1XS	496	0	496
TCGA-AC-A3HN-01A	0	TCGA-AC-A3HN	496	0	496
TCGA-D8-A1XQ-01A	0	TCGA-D8-A1XQ	499	0	499
TCGA-D8-A27L-01A	0	TCGA-D8-A27L	499	0	499
TCGA-A2-A1G6-01A	0	TCGA-A2-A1G6	501	0	501
TCGA-E2-A1BC-11A	0	TCGA-E2-A1BC	501	0	501
TCGA-E2-A1BC-01A	0	TCGA-E2-A1BC	501	0	501
TCGA-D8-A1JA-01A	0	TCGA-D8-A1JA	502	0	502
TCGA-D8-A1XY-01A	0	TCGA-D8-A1XY	503	0	503
TCGA-EW-A1J3-01A	0	TCGA-EW-A1J3	504	0	504
TCGA-AC-A3W5-01A	0	TCGA-AC-A3W5	504	0	504
TCGA-D8-A1XT-01A	0	TCGA-D8-A1XT	506	0	506
TCGA-C8-A274-01A	0	TCGA-C8-A274	508	0	508
TCGA-D8-A1X7-01A	0	TCGA-D8-A1X7	509	0	509
TCGA-EW-A6SA-01A	0	TCGA-EW-A6SA	510	0	510
TCGA-AC-A5EH-01A	0	TCGA-AC-A5EH	511	0	511
TCGA-C8-A273-01A	0	TCGA-C8-A273	513	0	513
TCGA-BH-A0HN-01A	0	TCGA-BH-A0HN	516	0	516
TCGA-A8-A0AB-01A	0	TCGA-A8-A0AB	518	0	518
TCGA-A8-A075-01A	0	TCGA-A8-A075	518	0	518
TCGA-UL-AAZ6-01A	0	TCGA-UL-AAZ6	518	0	518
TCGA-LL-A5YL-01A	0	TCGA-LL-A5YL	519	0	519
TCGA-D8-A27N-01A	0	TCGA-D8-A27N	519	0	519
TCGA-A2-A0T1-01A	0	TCGA-A2-A0T1	521	0	521
TCGA-D8-A1XD-01A	0	TCGA-D8-A1XD	522	0	522
TCGA-A2-A25C-01A	0	TCGA-A2-A25C	523	0	523
TCGA-AR-A1AR-01A	1	TCGA-AR-A1AR	524	1	524
TCGA-S3-AA15-01A	0	TCGA-S3-AA15	525	0	525
TCGA-E2-A15D-01A	0	TCGA-E2-A15D	526	0	526
TCGA-A2-A1FW-01A	0	TCGA-A2-A1FW	528	0	528
TCGA-OL-A66O-01A	0	TCGA-OL-A66O	528	0	528
TCGA-S3-AA14-01A	0	TCGA-S3-AA14	529	0	529
TCGA-AC-A62Y-01A	0	TCGA-AC-A62Y	530	0	530
TCGA-D8-A27E-01A	0	TCGA-D8-A27E	530	0	530
TCGA-A2-A0T5-01A	0	TCGA-A2-A0T5	531	0	531
TCGA-D8-A1J9-01A	0	TCGA-D8-A1J9	532	0	532
TCGA-EW-A3U0-01A	0	TCGA-EW-A3U0	532	0	532
TCGA-LL-A9Q3-01A	0	TCGA-LL-A9Q3	532	0	532
TCGA-EW-A423-01A	0	TCGA-EW-A423	533	0	533
TCGA-A2-A0T0-01A	0	TCGA-A2-A0T0	533	0	533
TCGA-E2-A9RU-01A	0	TCGA-E2-A9RU	538	0	538
TCGA-BH-A1EY-01A	1	TCGA-BH-A1EY	538	1	538
TCGA-BH-A1EY-11B	1	TCGA-BH-A1EY	538	1	538
TCGA-D8-A1XM-01A	0	TCGA-D8-A1XM	538	0	538
TCGA-AO-A1KT-01A	0	TCGA-AO-A1KT	541	0	541
TCGA-D8-A1X6-01A	0	TCGA-D8-A1X6	541	0	541
TCGA-A7-A4SF-01A	0	TCGA-A7-A4SF	545	0	545
TCGA-A8-A093-01A	0	TCGA-A8-A093	546	0	546
TCGA-A8-A06R-01A	0	TCGA-A8-A06R	547	0	547
TCGA-A2-A04P-01A	1	TCGA-A2-A04P	548	1	548
TCGA-GM-A5PX-01A	0	TCGA-GM-A5PX	551	0	551
TCGA-D8-A1JD-01A	0	TCGA-D8-A1JD	552	0	552
TCGA-A2-A25D-01A	0	TCGA-A2-A25D	552	0	552
TCGA-D8-A1XB-01A	0	TCGA-D8-A1XB	552	0	552
TCGA-E2-A15G-01A	0	TCGA-E2-A15G	554	0	554
TCGA-A2-A0YE-01A	0	TCGA-A2-A0YE	554	0	554
TCGA-A1-A0SQ-01A	0	TCGA-A1-A0SQ	554	0	554
TCGA-EW-A1IZ-01A	0	TCGA-EW-A1IZ	554	0	554
TCGA-BH-A0BD-01A	0	TCGA-BH-A0BD	554	0	554
TCGA-B6-A0WW-01A	1	TCGA-B6-A0WW	558	1	558
TCGA-S3-A6ZG-01A	0	TCGA-S3-A6ZG	562	0	562
TCGA-EW-A1P6-01A	0	TCGA-EW-A1P6	562	0	562
TCGA-D8-A3Z6-01A	0	TCGA-D8-A3Z6	563	0	563
TCGA-E2-A14Z-01A	1	TCGA-E2-A14Z	563	1	563
TCGA-D8-A1X5-01A	0	TCGA-D8-A1X5	565	0	565
TCGA-A2-A0YJ-01A	0	TCGA-A2-A0YJ	566	0	566
TCGA-BH-A5IZ-01A	0	TCGA-BH-A5IZ	567	0	567
TCGA-BH-A5IZ-11A	0	TCGA-BH-A5IZ	567	0	567
TCGA-AC-A6IV-01A	0	TCGA-AC-A6IV	568	0	568
TCGA-B6-A0IK-01A	1	TCGA-B6-A0IK	571	1	571
TCGA-S3-A6ZF-01A	0	TCGA-S3-A6ZF	572	0	572
TCGA-B6-A409-01A	1	TCGA-B6-A409	573	1	573
TCGA-BH-A8FZ-01A	0	TCGA-BH-A8FZ	574	0	574
TCGA-S3-AA12-01A	0	TCGA-S3-AA12	574	0	574
TCGA-EW-A1J1-01A	0	TCGA-EW-A1J1	575	0	575
TCGA-EW-A1PA-01A	0	TCGA-EW-A1PA	575	0	575
TCGA-A2-A0T6-01A	0	TCGA-A2-A0T6	575	0	575
TCGA-D8-A1JE-01A	0	TCGA-D8-A1JE	575	0	575
TCGA-E9-A1NH-11A	0	TCGA-E9-A1NH	576	0	576
TCGA-E9-A1NH-01A	0	TCGA-E9-A1NH	576	0	576
TCGA-D8-A1JI-01A	0	TCGA-D8-A1JI	577	0	577
TCGA-A8-A07G-01A	0	TCGA-A8-A07G	577	0	577
TCGA-A8-A07F-01A	0	TCGA-A8-A07F	577	0	577
TCGA-A8-A0A2-01A	0	TCGA-A8-A0A2	579	0	579
TCGA-A8-A09T-01A	0	TCGA-A8-A09T	579	0	579
TCGA-D8-A147-01A	0	TCGA-D8-A147	584	0	584
TCGA-A1-A0SP-01A	0	TCGA-A1-A0SP	584	0	584
TCGA-AQ-A7U7-01A	1	TCGA-AQ-A7U7	584	1	584
TCGA-A2-A1G1-01A	0	TCGA-A2-A1G1	584	0	584
TCGA-AC-A23C-01A	0	TCGA-AC-A23C	585	0	585
TCGA-S3-AA10-01A	0	TCGA-S3-AA10	586	0	586
TCGA-A2-A0YK-01A	0	TCGA-A2-A0YK	588	0	588
TCGA-AC-A5XS-01A	0	TCGA-AC-A5XS	588	0	588
TCGA-AC-A5XS-11A	0	TCGA-AC-A5XS	588	0	588
TCGA-AC-A2QI-01A	0	TCGA-AC-A2QI	588	0	588
TCGA-D8-A1JM-01A	0	TCGA-D8-A1JM	590	0	590
TCGA-E2-A154-01A	0	TCGA-E2-A154	591	0	591
TCGA-C8-A9FZ-01A	0	TCGA-C8-A9FZ	592	0	592
TCGA-LL-A7SZ-01A	0	TCGA-LL-A7SZ	594	0	594
TCGA-E2-A15P-01A	0	TCGA-E2-A15P	595	0	595
TCGA-A2-A1G4-01A	0	TCGA-A2-A1G4	595	0	595
TCGA-LL-A8F5-01A	0	TCGA-LL-A8F5	596	0	596
TCGA-E2-A1L9-01A	0	TCGA-E2-A1L9	598	0	598
TCGA-OL-A6VQ-01A	0	TCGA-OL-A6VQ	600	0	600
TCGA-AC-A3W6-01A	0	TCGA-AC-A3W6	602	0	602
TCGA-D8-A1XL-01A	0	TCGA-D8-A1XL	606	0	606
TCGA-A8-A08G-01A	0	TCGA-A8-A08G	607	0	607
TCGA-EW-A1PH-01A	0	TCGA-EW-A1PH	607	0	607
TCGA-EW-A1PB-01A	0	TCGA-EW-A1PB	608	0	608
TCGA-A8-A07E-01A	0	TCGA-A8-A07E	608	0	608
TCGA-D8-A1JJ-01A	0	TCGA-D8-A1JJ	611	0	611
TCGA-D8-A1JL-01A	0	TCGA-D8-A1JL	611	0	611
TCGA-E9-A243-01A	0	TCGA-E9-A243	612	0	612
TCGA-BH-A18J-01A	1	TCGA-BH-A18J	612	1	612
TCGA-BH-A18J-11A	1	TCGA-BH-A18J	612	1	612
TCGA-D8-A1JK-01A	0	TCGA-D8-A1JK	612	0	612
TCGA-BH-A2L8-01A	0	TCGA-BH-A2L8	612	0	612
TCGA-AC-A8OP-01A	0	TCGA-AC-A8OP	614	0	614
TCGA-A7-A13E-01B	1	TCGA-A7-A13E	614	1	614
TCGA-A7-A13E-01A	1	TCGA-A7-A13E	614	1	614
TCGA-A7-A13E-11A	1	TCGA-A7-A13E	614	1	614
TCGA-C8-A26V-01A	0	TCGA-C8-A26V	616	0	616
TCGA-A2-A1G0-01A	0	TCGA-A2-A1G0	616	0	616
TCGA-AR-A2LH-01A	1	TCGA-AR-A2LH	616	1	616
TCGA-AO-A0J7-01A	0	TCGA-AO-A0J7	618	0	618
TCGA-OL-A5S0-01A	0	TCGA-OL-A5S0	620	0	620
TCGA-D8-A1JN-01A	0	TCGA-D8-A1JN	620	0	620
TCGA-BH-A0HI-01A	0	TCGA-BH-A0HI	620	0	620
TCGA-BH-A0AW-01A	0	TCGA-BH-A0AW	622	0	622
TCGA-AO-A1KO-01A	0	TCGA-AO-A1KO	622	0	622
TCGA-A2-A0T4-01A	0	TCGA-A2-A0T4	624	0	624
TCGA-D8-A141-01A	0	TCGA-D8-A141	626	0	626
TCGA-E2-A15L-01A	0	TCGA-E2-A15L	626	0	626
TCGA-E2-A15L-11A	0	TCGA-E2-A15L	626	0	626
TCGA-A7-A26J-01A	0	TCGA-A7-A26J	627	0	627
TCGA-A7-A26J-01B	0	TCGA-A7-A26J	627	0	627
TCGA-S3-AA0Z-01A	0	TCGA-S3-AA0Z	629	0	629
TCGA-E2-A15E-06A	0	TCGA-E2-A15E	630	0	630
TCGA-E2-A15E-01A	0	TCGA-E2-A15E	630	0	630
TCGA-A2-A0T7-01A	0	TCGA-A2-A0T7	631	0	631
TCGA-D8-A13Z-01A	0	TCGA-D8-A13Z	635	0	635
TCGA-BH-A42V-01A	0	TCGA-BH-A42V	635	0	635
TCGA-A1-A0SI-01A	0	TCGA-A1-A0SI	635	0	635
TCGA-B6-A0WX-01A	1	TCGA-B6-A0WX	639	1	639
TCGA-D8-A1JP-01A	0	TCGA-D8-A1JP	639	0	639
TCGA-A8-A0A6-01A	0	TCGA-A8-A0A6	640	0	640
TCGA-E2-A155-01A	0	TCGA-E2-A155	640	0	640
TCGA-S3-A6ZH-01A	0	TCGA-S3-A6ZH	641	0	641
TCGA-D8-A146-01A	0	TCGA-D8-A146	643	0	643
TCGA-A2-A4S2-01A	0	TCGA-A2-A4S2	643	0	643
TCGA-A7-A4SE-11A	0	TCGA-A7-A4SE	644	0	644
TCGA-A7-A4SE-01A	0	TCGA-A7-A4SE	644	0	644
TCGA-LD-A66U-01A	0	TCGA-LD-A66U	646	0	646
TCGA-E9-A1RG-01A	0	TCGA-E9-A1RG	647	0	647
TCGA-A2-A4RY-01A	0	TCGA-A2-A4RY	648	0	648
TCGA-AO-A0J3-01A	0	TCGA-AO-A0J3	651	0	651
TCGA-BH-A18H-01A	0	TCGA-BH-A18H	652	0	652
TCGA-AO-A0JA-01A	0	TCGA-AO-A0JA	655	0	655
TCGA-E2-A15F-01A	0	TCGA-E2-A15F	658	0	658
TCGA-D8-A4Z1-01A	0	TCGA-D8-A4Z1	659	0	659
TCGA-A2-A0YH-01A	0	TCGA-A2-A0YH	659	0	659
TCGA-BH-A0BJ-11A	0	TCGA-BH-A0BJ	660	0	660
TCGA-BH-A0BJ-01A	0	TCGA-BH-A0BJ	660	0	660
TCGA-A7-A26I-01B	0	TCGA-A7-A26I	661	0	661
TCGA-A7-A26I-01A	0	TCGA-A7-A26I	661	0	661
TCGA-BH-A8G0-01A	0	TCGA-BH-A8G0	662	0	662
TCGA-D8-A1XJ-01A	0	TCGA-D8-A1XJ	663	0	663
TCGA-A2-A0YG-01A	0	TCGA-A2-A0YG	666	0	666
TCGA-A2-A4S3-01A	0	TCGA-A2-A4S3	666	0	666
TCGA-EW-A2FW-01A	0	TCGA-EW-A2FW	672	0	672
TCGA-E2-A1IN-01A	0	TCGA-E2-A1IN	675	0	675
TCGA-AC-A3QP-01A	0	TCGA-AC-A3QP	675	0	675
TCGA-AC-A2B8-01A	0	TCGA-AC-A2B8	677	0	677
TCGA-LL-A6FP-01A	0	TCGA-LL-A6FP	677	0	677
TCGA-E9-A1N6-01A	1	TCGA-E9-A1N6	678	1	678
TCGA-E9-A1N6-11A	1	TCGA-E9-A1N6	678	1	678
TCGA-OL-A5RZ-01A	0	TCGA-OL-A5RZ	679	0	679
TCGA-A7-A2KD-01A	0	TCGA-A7-A2KD	679	0	679
TCGA-AO-A0J8-01A	0	TCGA-AO-A0J8	680	0	680
TCGA-MS-A51U-01A	0	TCGA-MS-A51U	681	0	681
TCGA-A2-A1FZ-01A	0	TCGA-A2-A1FZ	683	0	683
TCGA-E2-A15C-01A	0	TCGA-E2-A15C	694	0	694
TCGA-EW-A1OW-01A	0	TCGA-EW-A1OW	694	0	694
TCGA-AC-A23E-01A	0	TCGA-AC-A23E	698	0	698
TCGA-BH-A0WA-01A	0	TCGA-BH-A0WA	701	0	701
TCGA-BH-A0H7-11A	0	TCGA-BH-A0H7	702	0	702
TCGA-BH-A0H7-01A	0	TCGA-BH-A0H7	702	0	702
TCGA-EW-A1P5-01A	0	TCGA-EW-A1P5	703	0	703
TCGA-A2-A4S0-01A	0	TCGA-A2-A4S0	706	0	706
TCGA-AC-A3YI-01A	0	TCGA-AC-A3YI	707	0	707
TCGA-E2-A153-11A	0	TCGA-E2-A153	707	0	707
TCGA-E2-A153-01A	0	TCGA-E2-A153	707	0	707
TCGA-AR-A0TU-01A	0	TCGA-AR-A0TU	709	0	709
TCGA-E2-A15A-06A	0	TCGA-E2-A15A	710	0	710
TCGA-E2-A15A-01A	0	TCGA-E2-A15A	710	0	710
TCGA-OL-A66I-01A	0	TCGA-OL-A66I	714	0	714
TCGA-A2-A1FV-01A	0	TCGA-A2-A1FV	714	0	714
TCGA-EW-A424-01A	0	TCGA-EW-A424	715	0	715
TCGA-BH-A5J0-01A	0	TCGA-BH-A5J0	715	0	715
TCGA-A7-A13G-01A	0	TCGA-A7-A13G	718	0	718
TCGA-A7-A13G-01B	0	TCGA-A7-A13G	718	0	718
TCGA-A7-A13G-11A	0	TCGA-A7-A13G	718	0	718
TCGA-A7-A26G-01A	0	TCGA-A7-A26G	722	0	722
TCGA-A2-A0YT-01A	1	TCGA-A2-A0YT	723	1	723
TCGA-A7-A26H-01A	0	TCGA-A7-A26H	724	0	724
TCGA-E9-A54Y-01A	0	TCGA-E9-A54Y	725	0	725
TCGA-E2-A156-01A	0	TCGA-E2-A156	726	0	726
TCGA-BH-A0HF-01A	0	TCGA-BH-A0HF	727	0	727
TCGA-D8-A1X9-01A	0	TCGA-D8-A1X9	727	0	727
TCGA-E9-A54X-01A	0	TCGA-E9-A54X	727	0	727
TCGA-BH-A0W3-01A	0	TCGA-BH-A0W3	728	0	728
TCGA-AC-A3QQ-01B	0	TCGA-AC-A3QQ	734	0	734
TCGA-AC-A3QQ-01A	0	TCGA-AC-A3QQ	734	0	734
TCGA-A7-A26F-01A	0	TCGA-A7-A26F	738	0	738
TCGA-A7-A26F-01B	0	TCGA-A7-A26F	738	0	738
TCGA-A2-A4RX-01A	0	TCGA-A2-A4RX	742	0	742
TCGA-BH-A0EB-01A	0	TCGA-BH-A0EB	745	0	745
TCGA-C8-A27A-01A	0	TCGA-C8-A27A	747	0	747
TCGA-E9-A24A-01A	0	TCGA-E9-A24A	747	0	747
TCGA-BH-A0H6-01A	0	TCGA-BH-A0H6	747	0	747
TCGA-E2-A1LA-01A	0	TCGA-E2-A1LA	748	0	748
TCGA-B6-A0I8-01A	1	TCGA-B6-A0I8	749	1	749
TCGA-OL-A5RY-01A	0	TCGA-OL-A5RY	752	0	752
TCGA-A2-A0EX-01A	0	TCGA-A2-A0EX	752	0	752
TCGA-AQ-A04H-01B	0	TCGA-AQ-A04H	754	0	754
TCGA-AC-A3YJ-01A	0	TCGA-AC-A3YJ	754	0	754
TCGA-A2-A0CM-01A	1	TCGA-A2-A0CM	754	1	754
TCGA-E9-A1QZ-01A	0	TCGA-E9-A1QZ	755	0	755
TCGA-LL-A440-01A	0	TCGA-LL-A440	759	0	759
TCGA-BH-A0W4-01A	0	TCGA-BH-A0W4	759	0	759
TCGA-A8-A07U-01A	0	TCGA-A8-A07U	760	0	760
TCGA-EW-A6SB-01A	0	TCGA-EW-A6SB	760	0	760
TCGA-A8-A09Q-01A	0	TCGA-A8-A09Q	761	0	761
TCGA-E2-A159-01A	0	TCGA-E2-A159	762	0	762
TCGA-LL-A50Y-01A	0	TCGA-LL-A50Y	762	0	762
TCGA-AC-A3TM-01A	0	TCGA-AC-A3TM	762	0	762
TCGA-BH-A1F8-11B	1	TCGA-BH-A1F8	763	1	763
TCGA-BH-A1F8-01A	1	TCGA-BH-A1F8	763	1	763
TCGA-A7-A13F-01A	0	TCGA-A7-A13F	765	0	765
TCGA-A7-A13F-11A	0	TCGA-A7-A13F	765	0	765
TCGA-D8-A73X-01A	0	TCGA-D8-A73X	767	0	767
TCGA-A2-A0D4-01A	0	TCGA-A2-A0D4	767	0	767
TCGA-A2-A0YD-01A	0	TCGA-A2-A0YD	769	0	769
TCGA-BH-A0AY-01A	0	TCGA-BH-A0AY	777	0	777
TCGA-BH-A0AY-11A	0	TCGA-BH-A0AY	777	0	777
TCGA-D8-A1X8-01A	0	TCGA-D8-A1X8	783	0	783
TCGA-BH-A1F0-11B	1	TCGA-BH-A1F0	785	1	785
TCGA-BH-A1F0-01A	1	TCGA-BH-A1F0	785	1	785
TCGA-E9-A5UO-01A	0	TCGA-E9-A5UO	785	0	785
TCGA-E9-A1NG-01A	1	TCGA-E9-A1NG	786	1	786
TCGA-E9-A1NG-11A	1	TCGA-E9-A1NG	786	1	786
TCGA-EW-A2FV-01A	0	TCGA-EW-A2FV	788	0	788
TCGA-EW-A1OV-01A	0	TCGA-EW-A1OV	789	0	789
TCGA-A8-A06Y-01A	0	TCGA-A8-A06Y	791	0	791
TCGA-AC-A2FM-01A	1	TCGA-AC-A2FM	792	1	792
TCGA-AC-A2FM-11B	1	TCGA-AC-A2FM	792	1	792
TCGA-OL-A66N-01A	0	TCGA-OL-A66N	792	0	792
TCGA-AO-A0J5-01A	1	TCGA-AO-A0J5	792	1	792
TCGA-BH-A202-01A	0	TCGA-BH-A202	795	0	795
TCGA-AO-A0JG-01A	0	TCGA-AO-A0JG	798	0	798
TCGA-E9-A5UP-01A	0	TCGA-E9-A5UP	803	0	803
TCGA-BH-A0HB-01A	0	TCGA-BH-A0HB	806	0	806
TCGA-BH-A18L-11A	1	TCGA-BH-A18L	811	1	811
TCGA-BH-A18L-01A	1	TCGA-BH-A18L	811	1	811
TCGA-E9-A5FK-01A	0	TCGA-E9-A5FK	812	0	812
TCGA-AQ-A04J-01A	0	TCGA-AQ-A04J	819	0	819
TCGA-A2-A4S1-01A	0	TCGA-A2-A4S1	820	0	820
TCGA-E2-A2P5-01A	1	TCGA-E2-A2P5	821	1	821
TCGA-A8-A0A9-01A	0	TCGA-A8-A0A9	822	0	822
TCGA-A2-A0SV-01A	1	TCGA-A2-A0SV	825	1	825
TCGA-BH-A0HX-01A	0	TCGA-BH-A0HX	829	0	829
TCGA-E2-A108-01A	0	TCGA-E2-A108	837	0	837
TCGA-D8-A1XA-01A	0	TCGA-D8-A1XA	839	0	839
TCGA-E9-A6HE-01A	0	TCGA-E9-A6HE	847	0	847
TCGA-LQ-A4E4-01A	0	TCGA-LQ-A4E4	849	0	849
TCGA-A1-A0SO-01A	0	TCGA-A1-A0SO	852	0	852
TCGA-BH-A201-01A	0	TCGA-BH-A201	856	0	856
TCGA-OL-A6VO-01A	0	TCGA-OL-A6VO	858	0	858
TCGA-B6-A0X4-01A	1	TCGA-B6-A0X4	860	1	860
TCGA-E9-A1R0-01A	0	TCGA-E9-A1R0	860	0	860
TCGA-E2-A10E-01A	0	TCGA-E2-A10E	865	0	865
TCGA-E2-A1IJ-01A	0	TCGA-E2-A1IJ	865	0	865
TCGA-E2-A1B6-01A	0	TCGA-E2-A1B6	867	0	867
TCGA-EW-A1J6-01A	0	TCGA-EW-A1J6	875	0	875
TCGA-OL-A5RX-01A	0	TCGA-OL-A5RX	878	0	878
TCGA-E2-A10F-01A	0	TCGA-E2-A10F	878	0	878
TCGA-E2-A1LE-01A	1	TCGA-E2-A1LE	879	1	879
TCGA-E2-A1LE-11A	1	TCGA-E2-A1LE	879	1	879
TCGA-A8-A08C-01A	0	TCGA-A8-A08C	881	0	881
TCGA-A8-A06U-01A	1	TCGA-A8-A06U	883	1	883
TCGA-WT-AB44-01A	0	TCGA-WT-AB44	883	0	883
TCGA-LL-A442-01A	0	TCGA-LL-A442	889	0	889
TCGA-AC-A4ZE-01A	0	TCGA-AC-A4ZE	890	0	890
TCGA-A7-A13H-01A	0	TCGA-A7-A13H	899	0	899
TCGA-E9-A2JS-01A	1	TCGA-E9-A2JS	904	1	904
TCGA-A7-A0DC-11A	0	TCGA-A7-A0DC	906	0	906
TCGA-A7-A0DC-01A	0	TCGA-A7-A0DC	906	0	906
TCGA-A7-A0DC-01B	0	TCGA-A7-A0DC	906	0	906
TCGA-EW-A1P4-01A	0	TCGA-EW-A1P4	907	0	907
TCGA-EW-A1OY-01A	0	TCGA-EW-A1OY	908	0	908
TCGA-EW-A1OX-01A	0	TCGA-EW-A1OX	911	0	911
TCGA-A2-A3XU-01A	1	TCGA-A2-A3XU	912	1	912
TCGA-A8-A09K-01A	0	TCGA-A8-A09K	912	0	912
TCGA-BH-A0DI-11A	0	TCGA-BH-A0DI	912	0	912
TCGA-BH-A0DI-01A	0	TCGA-BH-A0DI	912	0	912
TCGA-EW-A1P7-01A	0	TCGA-EW-A1P7	915	0	915
TCGA-E9-A3QA-01A	0	TCGA-E9-A3QA	918	0	918
TCGA-BH-A18P-01A	1	TCGA-BH-A18P	921	1	921
TCGA-BH-A18P-11A	1	TCGA-BH-A18P	921	1	921
TCGA-BH-A0GY-01A	0	TCGA-BH-A0GY	923	0	923
TCGA-E9-A3X8-01A	0	TCGA-E9-A3X8	926	0	926
TCGA-A7-A0CJ-01A	0	TCGA-A7-A0CJ	931	0	931
TCGA-E2-A570-01A	0	TCGA-E2-A570	931	0	931
TCGA-A8-A092-01A	0	TCGA-A8-A092	942	0	942
TCGA-BH-A0EE-01A	0	TCGA-BH-A0EE	943	0	943
TCGA-A8-A08O-01A	0	TCGA-A8-A08O	943	0	943
TCGA-A8-A06X-01A	1	TCGA-A8-A06X	943	1	943
TCGA-A8-A08P-01A	0	TCGA-A8-A08P	943	0	943
TCGA-EW-A6SC-01A	0	TCGA-EW-A6SC	952	0	952
TCGA-A7-A26E-01B	0	TCGA-A7-A26E	954	0	954
TCGA-A7-A26E-01A	0	TCGA-A7-A26E	954	0	954
TCGA-BH-A1F2-11A	1	TCGA-BH-A1F2	959	1	959
TCGA-BH-A1F2-01A	1	TCGA-BH-A1F2	959	1	959
TCGA-A2-A0YM-01A	0	TCGA-A2-A0YM	965	0	965
TCGA-A7-A13D-01B	0	TCGA-A7-A13D	965	0	965
TCGA-A7-A13D-01A	0	TCGA-A7-A13D	965	0	965
TCGA-A1-A0SK-01A	1	TCGA-A1-A0SK	967	1	967
TCGA-A2-A0EV-01A	0	TCGA-A2-A0EV	968	0	968
TCGA-E2-A14X-01A	0	TCGA-E2-A14X	972	0	972
TCGA-OL-A5D8-01A	0	TCGA-OL-A5D8	973	0	973
TCGA-BH-A0BC-11A	0	TCGA-BH-A0BC	974	0	974
TCGA-BH-A0BC-01A	0	TCGA-BH-A0BC	974	0	974
TCGA-E2-A14W-01A	0	TCGA-E2-A14W	974	0	974
TCGA-A8-A07L-01A	0	TCGA-A8-A07L	975	0	975
TCGA-E9-A227-01A	0	TCGA-E9-A227	975	0	975
TCGA-E9-A1RB-01A	1	TCGA-E9-A1RB	976	1	976
TCGA-E9-A1RB-11A	1	TCGA-E9-A1RB	976	1	976
TCGA-E2-A1B5-01A	0	TCGA-E2-A1B5	984	0	984
TCGA-E2-A1B5-11A	0	TCGA-E2-A1B5	984	0	984
TCGA-AC-A3BB-01A	0	TCGA-AC-A3BB	987	0	987
TCGA-AQ-A1H3-01A	0	TCGA-AQ-A1H3	989	0	989
TCGA-A2-A0YC-01A	0	TCGA-A2-A0YC	990	0	990
TCGA-BH-A0EA-01A	1	TCGA-BH-A0EA	991	1	991
TCGA-AR-A24W-01A	0	TCGA-AR-A24W	991	0	991
TCGA-B6-A0I6-01A	1	TCGA-B6-A0I6	991	1	991
TCGA-A2-A3XV-01A	0	TCGA-A2-A3XV	996	0	996
TCGA-LL-A441-01A	0	TCGA-LL-A441	996	0	996
TCGA-AO-A0J2-01A	0	TCGA-AO-A0J2	997	0	997
TCGA-E9-A1N4-01A	0	TCGA-E9-A1N4	1000	0	1000
TCGA-E9-A1N4-11A	0	TCGA-E9-A1N4	1000	0	1000
TCGA-BH-A18F-11A	0	TCGA-BH-A18F	1001	0	1001
TCGA-BH-A18F-01A	0	TCGA-BH-A18F	1001	0	1001
TCGA-E9-A3Q9-01A	0	TCGA-E9-A3Q9	1001	0	1001
TCGA-AQ-A54O-01A	0	TCGA-AQ-A54O	1001	0	1001
TCGA-A8-A08F-01A	0	TCGA-A8-A08F	1004	0	1004
TCGA-E2-A1B4-01A	1	TCGA-E2-A1B4	1004	1	1004
TCGA-A8-A091-01A	0	TCGA-A8-A091	1004	0	1004
TCGA-A8-A08S-01A	0	TCGA-A8-A08S	1004	0	1004
TCGA-AC-A2QH-01B	0	TCGA-AC-A2QH	1005	0	1005
TCGA-AC-A2QH-01A	0	TCGA-AC-A2QH	1005	0	1005
TCGA-A8-A09M-01A	0	TCGA-A8-A09M	1006	0	1006
TCGA-A7-A0DB-11A	0	TCGA-A7-A0DB	1007	0	1007
TCGA-A7-A0DB-01C	0	TCGA-A7-A0DB	1007	0	1007
TCGA-A7-A0DB-01A	0	TCGA-A7-A0DB	1007	0	1007
TCGA-BH-A1FD-01A	1	TCGA-BH-A1FD	1009	1	1009
TCGA-BH-A1FD-11B	1	TCGA-BH-A1FD	1009	1	1009
TCGA-E2-A14S-01A	0	TCGA-E2-A14S	1009	0	1009
TCGA-EW-A6SD-01A	0	TCGA-EW-A6SD	1010	0	1010
TCGA-AR-A5QN-01A	0	TCGA-AR-A5QN	1013	0	1013
TCGA-D8-A3Z5-01A	0	TCGA-D8-A3Z5	1015	0	1015
TCGA-E2-A1II-01A	0	TCGA-E2-A1II	1025	0	1025
TCGA-E2-A1II-11A	0	TCGA-E2-A1II	1025	0	1025
TCGA-E2-A1IH-01A	0	TCGA-E2-A1IH	1026	0	1026
TCGA-AR-A1AY-01A	0	TCGA-AR-A1AY	1026	0	1026
TCGA-A2-A0D2-01A	0	TCGA-A2-A0D2	1027	0	1027
TCGA-A2-A3XS-01A	1	TCGA-A2-A3XS	1032	1	1032
TCGA-BH-A1FH-11B	1	TCGA-BH-A1FH	1034	1	1034
TCGA-BH-A1FH-01A	1	TCGA-BH-A1FH	1034	1	1034
TCGA-C8-A3M7-01A	1	TCGA-C8-A3M7	1034	1	1034
TCGA-A8-A07C-01A	0	TCGA-A8-A07C	1034	0	1034
TCGA-EW-A3E8-01B	0	TCGA-EW-A3E8	1035	0	1035
TCGA-E9-A1N8-11A	0	TCGA-E9-A1N8	1039	0	1039
TCGA-E9-A1N8-01A	0	TCGA-E9-A1N8	1039	0	1039
TCGA-E2-A14V-01A	0	TCGA-E2-A14V	1042	0	1042
TCGA-A2-A0EU-01A	0	TCGA-A2-A0EU	1043	0	1043
TCGA-E2-A576-01A	0	TCGA-E2-A576	1043	0	1043
TCGA-A7-A0CG-01A	0	TCGA-A7-A0CG	1043	0	1043
TCGA-E2-A107-01A	0	TCGA-E2-A107	1047	0	1047
TCGA-E9-A226-01A	1	TCGA-E9-A226	1048	1	1048
TCGA-EW-A1PG-01A	0	TCGA-EW-A1PG	1051	0	1051
TCGA-E2-A2P6-01A	0	TCGA-E2-A2P6	1051	0	1051
TCGA-A2-A0D1-01A	0	TCGA-A2-A0D1	1051	0	1051
TCGA-E9-A1N3-01A	0	TCGA-E9-A1N3	1059	0	1059
TCGA-OL-A5RV-01A	0	TCGA-OL-A5RV	1062	0	1062
TCGA-E2-A573-01A	0	TCGA-E2-A573	1062	0	1062
TCGA-E9-A1R2-01A	0	TCGA-E9-A1R2	1063	0	1063
TCGA-A2-A0ET-01A	0	TCGA-A2-A0ET	1066	0	1066
TCGA-E9-A1NF-01A	1	TCGA-E9-A1NF	1072	1	1072
TCGA-E9-A1NF-11A	1	TCGA-E9-A1NF	1072	1	1072
TCGA-A7-A0CE-01A	0	TCGA-A7-A0CE	1074	0	1074
TCGA-A7-A0CE-11A	0	TCGA-A7-A0CE	1074	0	1074
TCGA-A7-A0CH-11A	0	TCGA-A7-A0CH	1079	0	1079
TCGA-A7-A0CH-01A	0	TCGA-A7-A0CH	1079	0	1079
TCGA-A7-A0DA-01A	0	TCGA-A7-A0DA	1085	0	1085
TCGA-E9-A1NE-01A	0	TCGA-E9-A1NE	1088	0	1088
TCGA-E9-A1NE-11A	0	TCGA-E9-A1NE	1088	0	1088
TCGA-A2-A3XY-01A	1	TCGA-A2-A3XY	1093	1	1093
TCGA-BH-A18I-01A	0	TCGA-BH-A18I	1093	0	1093
TCGA-A2-A04Y-01A	0	TCGA-A2-A04Y	1099	0	1099
TCGA-E9-A1N9-11A	0	TCGA-E9-A1N9	1101	0	1101
TCGA-E9-A1N9-01A	0	TCGA-E9-A1N9	1101	0	1101
TCGA-A2-A3KC-01A	0	TCGA-A2-A3KC	1102	0	1102
TCGA-OL-A5D6-01A	1	TCGA-OL-A5D6	1104	1	1104
TCGA-OL-A5RW-01A	0	TCGA-OL-A5RW	1106	0	1106
TCGA-E9-A1NA-11A	0	TCGA-E9-A1NA	1112	0	1112
TCGA-E9-A1NA-01A	0	TCGA-E9-A1NA	1112	0	1112
TCGA-BH-A28Q-01A	0	TCGA-BH-A28Q	1119	0	1119
TCGA-E9-A1N5-01A	0	TCGA-E9-A1N5	1120	0	1120
TCGA-E9-A1N5-11A	0	TCGA-E9-A1N5	1120	0	1120
TCGA-BH-A28O-01A	0	TCGA-BH-A28O	1120	0	1120
TCGA-BH-A0HQ-01A	0	TCGA-BH-A0HQ	1121	0	1121
TCGA-A8-A085-01A	0	TCGA-A8-A085	1124	0	1124
TCGA-A8-A08J-01A	1	TCGA-A8-A08J	1127	1	1127
TCGA-BH-A0BA-11A	0	TCGA-BH-A0BA	1132	0	1132
TCGA-BH-A0BA-01A	0	TCGA-BH-A0BA	1132	0	1132
TCGA-E2-A1BD-01A	0	TCGA-E2-A1BD	1133	0	1133
TCGA-E2-A1IF-11A	0	TCGA-E2-A1IF	1138	0	1138
TCGA-E2-A1IF-01A	0	TCGA-E2-A1IF	1138	0	1138
TCGA-A7-A0D9-11A	0	TCGA-A7-A0D9	1139	0	1139
TCGA-A7-A0D9-01A	0	TCGA-A7-A0D9	1139	0	1139
TCGA-AO-A0J6-01A	0	TCGA-AO-A0J6	1140	0	1140
TCGA-E2-A10B-01A	0	TCGA-E2-A10B	1141	0	1141
TCGA-BH-A18R-01A	1	TCGA-BH-A18R	1142	1	1142
TCGA-BH-A18R-11A	1	TCGA-BH-A18R	1142	1	1142
TCGA-BH-A0B1-01A	0	TCGA-BH-A0B1	1148	0	1148
TCGA-BH-A18N-11A	1	TCGA-BH-A18N	1148	1	1148
TCGA-BH-A18N-01A	1	TCGA-BH-A18N	1148	1	1148
TCGA-E9-A229-01A	0	TCGA-E9-A229	1148	0	1148
TCGA-AR-A1AS-01A	0	TCGA-AR-A1AS	1150	0	1150
TCGA-B6-A3ZX-01A	1	TCGA-B6-A3ZX	1152	1	1152
TCGA-A8-A08B-01A	0	TCGA-A8-A08B	1156	0	1156
TCGA-BH-A0DH-11A	0	TCGA-BH-A0DH	1156	0	1156
TCGA-BH-A0DH-01A	0	TCGA-BH-A0DH	1156	0	1156
TCGA-A8-A0AD-01A	0	TCGA-A8-A0AD	1157	0	1157
TCGA-E9-A3HO-01A	0	TCGA-E9-A3HO	1158	0	1158
TCGA-AR-A2LN-01A	0	TCGA-AR-A2LN	1161	0	1161
TCGA-GM-A3NY-01A	0	TCGA-GM-A3NY	1162	0	1162
TCGA-E2-A14Q-01A	0	TCGA-E2-A14Q	1163	0	1163
TCGA-A7-A0CD-01A	0	TCGA-A7-A0CD	1165	0	1165
TCGA-E9-A22B-01A	0	TCGA-E9-A22B	1167	0	1167
TCGA-E2-A14R-01A	0	TCGA-E2-A14R	1174	0	1174
TCGA-BH-A203-01A	1	TCGA-BH-A203	1174	1	1174
TCGA-BH-A203-11A	1	TCGA-BH-A203	1174	1	1174
TCGA-E2-A574-01A	0	TCGA-E2-A574	1179	0	1179
TCGA-AR-A5QP-01A	0	TCGA-AR-A5QP	1185	0	1185
TCGA-E9-A247-01A	0	TCGA-E9-A247	1186	0	1186
TCGA-E9-A22A-01A	0	TCGA-E9-A22A	1189	0	1189
TCGA-BH-A0B4-01A	0	TCGA-BH-A0B4	1191	0	1191
TCGA-A1-A0SN-01A	0	TCGA-A1-A0SN	1196	0	1196
TCGA-AR-A2LO-01A	0	TCGA-AR-A2LO	1198	0	1198
TCGA-BH-A0B3-01A	0	TCGA-BH-A0B3	1203	0	1203
TCGA-BH-A0B3-11B	0	TCGA-BH-A0B3	1203	0	1203
TCGA-E9-A1NC-01A	0	TCGA-E9-A1NC	1203	0	1203
TCGA-A2-A3KD-01A	0	TCGA-A2-A3KD	1206	0	1206
TCGA-E2-A572-01A	0	TCGA-E2-A572	1208	0	1208
TCGA-EW-A1IX-01A	0	TCGA-EW-A1IX	1208	0	1208
TCGA-EW-A1P1-01A	0	TCGA-EW-A1P1	1210	0	1210
TCGA-A8-A08Z-01A	0	TCGA-A8-A08Z	1217	0	1217
TCGA-OL-A5RU-01A	0	TCGA-OL-A5RU	1219	0	1219
TCGA-E2-A10C-01A	0	TCGA-E2-A10C	1220	0	1220
TCGA-OL-A6VR-01A	0	TCGA-OL-A6VR	1220	0	1220
TCGA-E9-A1RC-01A	0	TCGA-E9-A1RC	1224	0	1224
TCGA-E9-A1RC-11A	0	TCGA-E9-A1RC	1224	0	1224
TCGA-EW-A1OZ-01A	0	TCGA-EW-A1OZ	1229	0	1229
TCGA-E2-A10A-01A	0	TCGA-E2-A10A	1229	0	1229
TCGA-E9-A22H-01A	0	TCGA-E9-A22H	1232	0	1232
TCGA-AR-A2LQ-01A	0	TCGA-AR-A2LQ	1233	0	1233
TCGA-AC-A2FB-11A	0	TCGA-AC-A2FB	1234	0	1234
TCGA-AC-A2FB-01A	0	TCGA-AC-A2FB	1234	0	1234
TCGA-AO-A12H-01A	0	TCGA-AO-A12H	1234	0	1234
TCGA-E9-A22G-01A	0	TCGA-E9-A22G	1239	0	1239
TCGA-E2-A14P-01A	0	TCGA-E2-A14P	1246	0	1246
TCGA-BH-A0H9-01A	0	TCGA-BH-A0H9	1247	0	1247
TCGA-BH-A0H9-11A	0	TCGA-BH-A0H9	1247	0	1247
TCGA-E9-A22D-01A	0	TCGA-E9-A22D	1248	0	1248
TCGA-EW-A1P0-01A	0	TCGA-EW-A1P0	1251	0	1251
TCGA-E9-A1ND-01A	0	TCGA-E9-A1ND	1266	0	1266
TCGA-E9-A1ND-11A	0	TCGA-E9-A1ND	1266	0	1266
TCGA-E9-A22E-01A	0	TCGA-E9-A22E	1269	0	1269
TCGA-BH-A0C0-01A	0	TCGA-BH-A0C0	1270	0	1270
TCGA-BH-A0C0-11A	0	TCGA-BH-A0C0	1270	0	1270
TCGA-AR-A1AT-01A	1	TCGA-AR-A1AT	1272	1	1272
TCGA-OL-A66K-01A	1	TCGA-OL-A66K	1275	1	1275
TCGA-A8-A095-01A	0	TCGA-A8-A095	1277	0	1277
TCGA-E9-A228-01A	0	TCGA-E9-A228	1285	0	1285
TCGA-BH-A1EU-11A	1	TCGA-BH-A1EU	1286	1	1286
TCGA-BH-A1EU-01A	1	TCGA-BH-A1EU	1286	1	1286
TCGA-BH-A0W5-01A	0	TCGA-BH-A0W5	1288	0	1288
TCGA-A2-A25B-01A	0	TCGA-A2-A25B	1291	0	1291
TCGA-OL-A66L-01A	0	TCGA-OL-A66L	1301	0	1301
TCGA-E2-A105-01A	0	TCGA-E2-A105	1308	0	1308
TCGA-A8-A07B-01A	0	TCGA-A8-A07B	1308	0	1308
TCGA-A8-A08X-01A	0	TCGA-A8-A08X	1308	0	1308
TCGA-E2-A1LL-01A	0	TCGA-E2-A1LL	1309	0	1309
TCGA-E2-A1LL-11A	0	TCGA-E2-A1LL	1309	0	1309
TCGA-D8-A1XW-01A	0	TCGA-D8-A1XW	1309	0	1309
TCGA-E2-A14U-01A	0	TCGA-E2-A14U	1318	0	1318
TCGA-A1-A0SE-01A	0	TCGA-A1-A0SE	1321	0	1321
TCGA-BH-A0BF-01A	1	TCGA-BH-A0BF	1324	1	1324
TCGA-BH-A0BF-11A	1	TCGA-BH-A0BF	1324	1	1324
TCGA-E2-A3DX-01A	0	TCGA-E2-A3DX	1325	0	1325
TCGA-B6-A1KC-01A	0	TCGA-B6-A1KC	1326	0	1326
TCGA-B6-A1KC-01B	0	TCGA-B6-A1KC	1326	0	1326
TCGA-GM-A3XG-01A	0	TCGA-GM-A3XG	1330	0	1330
TCGA-A2-A0SY-01A	0	TCGA-A2-A0SY	1347	0	1347
TCGA-AO-A03V-01A	0	TCGA-AO-A03V	1351	0	1351
TCGA-E2-A14O-01A	0	TCGA-E2-A14O	1359	0	1359
TCGA-BH-A0E7-01A	0	TCGA-BH-A0E7	1363	0	1363
TCGA-BH-A0W7-01A	0	TCGA-BH-A0W7	1363	0	1363
TCGA-A2-A0SW-01A	1	TCGA-A2-A0SW	1365	1	1365
TCGA-E9-A1RA-01A	0	TCGA-E9-A1RA	1369	0	1369
TCGA-A8-A07Z-01A	0	TCGA-A8-A07Z	1371	0	1371
TCGA-A8-A09I-01A	0	TCGA-A8-A09I	1371	0	1371
TCGA-BH-A1FM-01A	1	TCGA-BH-A1FM	1388	1	1388
TCGA-BH-A1FM-11B	1	TCGA-BH-A1FM	1388	1	1388
TCGA-BH-A0C1-01A	1	TCGA-BH-A0C1	1411	1	1411
TCGA-BH-A0C1-01B	1	TCGA-BH-A0C1	1411	1	1411
TCGA-E2-A109-01A	0	TCGA-E2-A109	1417	0	1417
TCGA-E9-A1RH-01A	0	TCGA-E9-A1RH	1417	0	1417
TCGA-E9-A1RH-11A	0	TCGA-E9-A1RH	1417	0	1417
TCGA-E9-A1RE-01A	0	TCGA-E9-A1RE	1419	0	1419
TCGA-PE-A5DC-01A	1	TCGA-PE-A5DC	1430	1	1430
TCGA-E2-A14N-01A	0	TCGA-E2-A14N	1434	0	1434
TCGA-A1-A0SH-01A	0	TCGA-A1-A0SH	1437	0	1437
TCGA-A2-A3XX-01A	1	TCGA-A2-A3XX	1439	1	1439
TCGA-3C-AALK-01A	0	TCGA-3C-AALK	1448	0	1448
TCGA-E9-A1RI-01A	0	TCGA-E9-A1RI	1449	0	1449
TCGA-E9-A1RI-11A	0	TCGA-E9-A1RI	1449	0	1449
TCGA-D8-A27K-01A	0	TCGA-D8-A27K	1461	0	1461
TCGA-A1-A0SF-01A	0	TCGA-A1-A0SF	1463	0	1463
TCGA-E9-A1R7-11A	0	TCGA-E9-A1R7	1467	0	1467
TCGA-E9-A1R7-01A	0	TCGA-E9-A1R7	1467	0	1467
TCGA-5L-AAT1-01A	0	TCGA-5L-AAT1	1471	0	1471
TCGA-A2-A0YL-01A	0	TCGA-A2-A0YL	1474	0	1474
TCGA-3C-AALJ-01A	0	TCGA-3C-AALJ	1474	0	1474
TCGA-C8-A12Y-01A	0	TCGA-C8-A12Y	1476	0	1476
TCGA-5L-AAT0-01A	0	TCGA-5L-AAT0	1477	0	1477
TCGA-A8-A09E-01A	0	TCGA-A8-A09E	1492	0	1492
TCGA-A2-A0YI-01A	0	TCGA-A2-A0YI	1505	0	1505
TCGA-BH-A1EX-01A	1	TCGA-BH-A1EX	1508	1	1508
TCGA-BH-A1EX-11A	1	TCGA-BH-A1EX	1508	1	1508
TCGA-A2-A0T3-01A	0	TCGA-A2-A0T3	1516	0	1516
TCGA-BH-A0BV-01A	0	TCGA-BH-A0BV	1519	0	1519
TCGA-BH-A0BV-11A	0	TCGA-BH-A0BV	1519	0	1519
TCGA-A8-A09D-01A	0	TCGA-A8-A09D	1522	0	1522
TCGA-E2-A1LG-01A	0	TCGA-E2-A1LG	1523	0	1523
TCGA-E2-A1LG-11A	0	TCGA-E2-A1LG	1523	0	1523
TCGA-AO-A0JI-01A	0	TCGA-AO-A0JI	1528	0	1528
TCGA-A2-A3XZ-01A	0	TCGA-A2-A3XZ	1532	0	1532
TCGA-A2-A0SX-01A	0	TCGA-A2-A0SX	1534	0	1534
TCGA-A2-A0YF-01A	0	TCGA-A2-A0YF	1535	0	1535
TCGA-B6-A0IC-01A	1	TCGA-B6-A0IC	1542	1	1542
TCGA-AO-A0JB-01A	0	TCGA-AO-A0JB	1542	0	1542
TCGA-BH-A0HY-01A	0	TCGA-BH-A0HY	1545	0	1545
TCGA-E2-A15O-01A	0	TCGA-E2-A15O	1545	0	1545
TCGA-A2-A3Y0-01A	0	TCGA-A2-A3Y0	1546	0	1546
TCGA-AO-A0JC-01A	0	TCGA-AO-A0JC	1547	0	1547
TCGA-AR-A24K-01A	0	TCGA-AR-A24K	1548	0	1548
TCGA-BH-A18V-11A	1	TCGA-BH-A18V	1556	1	1556
TCGA-BH-A18V-01A	1	TCGA-BH-A18V	1556	1	1556
TCGA-BH-A18V-06A	1	TCGA-BH-A18V	1556	1	1556
TCGA-BH-A0HW-01A	0	TCGA-BH-A0HW	1561	0	1561
TCGA-BH-A18U-11A	1	TCGA-BH-A18U	1563	1	1563
TCGA-BH-A18U-01A	1	TCGA-BH-A18U	1563	1	1563
TCGA-E2-A15T-01A	0	TCGA-E2-A15T	1563	0	1563
TCGA-BH-A0B8-11A	0	TCGA-BH-A0B8	1569	0	1569
TCGA-BH-A0B8-01A	0	TCGA-BH-A0B8	1569	0	1569
TCGA-BH-A0B9-01A	0	TCGA-BH-A0B9	1572	0	1572
TCGA-AO-A0J4-01A	0	TCGA-AO-A0J4	1587	0	1587
TCGA-A2-A259-01A	0	TCGA-A2-A259	1596	0	1596
TCGA-E2-A1LS-11A	0	TCGA-E2-A1LS	1604	0	1604
TCGA-E2-A1LS-01A	0	TCGA-E2-A1LS	1604	0	1604
TCGA-EW-A2FS-01A	0	TCGA-EW-A2FS	1604	0	1604
TCGA-EW-A1P3-01A	0	TCGA-EW-A1P3	1611	0	1611
TCGA-BH-A0HA-01A	0	TCGA-BH-A0HA	1611	0	1611
TCGA-BH-A0HA-11A	0	TCGA-BH-A0HA	1611	0	1611
TCGA-WT-AB41-01A	0	TCGA-WT-AB41	1611	0	1611
TCGA-D8-A1JG-01B	0	TCGA-D8-A1JG	1612	0	1612
TCGA-AO-A0J9-01A	0	TCGA-AO-A0J9	1613	0	1613
TCGA-A8-A06T-01A	0	TCGA-A8-A06T	1614	0	1614
TCGA-A2-A0CZ-01A	0	TCGA-A2-A0CZ	1616	0	1616
TCGA-BH-A0H5-11A	0	TCGA-BH-A0H5	1620	0	1620
TCGA-BH-A0H5-01A	0	TCGA-BH-A0H5	1620	0	1620
TCGA-E2-A1B0-01A	0	TCGA-E2-A1B0	1631	0	1631
TCGA-AO-A12G-01A	0	TCGA-AO-A12G	1639	0	1639
TCGA-E2-A15J-01A	0	TCGA-E2-A15J	1640	0	1640
TCGA-BH-A1FR-11B	1	TCGA-BH-A1FR	1642	1	1642
TCGA-BH-A1FR-01A	1	TCGA-BH-A1FR	1642	1	1642
TCGA-A8-A076-01A	0	TCGA-A8-A076	1642	0	1642
TCGA-BH-A0DO-01B	0	TCGA-BH-A0DO	1644	0	1644
TCGA-BH-A0DO-11A	0	TCGA-BH-A0DO	1644	0	1644
TCGA-E2-A1L6-01A	0	TCGA-E2-A1L6	1648	0	1648
TCGA-AR-A2LK-01A	1	TCGA-AR-A2LK	1649	1	1649
TCGA-A2-A0SU-01A	0	TCGA-A2-A0SU	1662	0	1662
TCGA-BH-A1FL-01A	1	TCGA-BH-A1FL	1673	1	1673
TCGA-BH-A1FL-11A	1	TCGA-BH-A1FL	1673	1	1673
TCGA-EW-A2FR-01A	0	TCGA-EW-A2FR	1673	0	1673
TCGA-A2-A0CY-01A	0	TCGA-A2-A0CY	1673	0	1673
TCGA-D8-A1XO-01A	0	TCGA-D8-A1XO	1682	0	1682
TCGA-AO-A0JL-01A	0	TCGA-AO-A0JL	1683	0	1683
TCGA-A2-A04X-01A	0	TCGA-A2-A04X	1686	0	1686
TCGA-D8-A1JB-01A	0	TCGA-D8-A1JB	1688	0	1688
TCGA-BH-A1FU-01A	1	TCGA-BH-A1FU	1688	1	1688
TCGA-BH-A1FU-11A	1	TCGA-BH-A1FU	1688	1	1688
TCGA-E2-A15I-11A	0	TCGA-E2-A15I	1692	0	1692
TCGA-E2-A15I-01A	0	TCGA-E2-A15I	1692	0	1692
TCGA-BH-A18Q-01A	1	TCGA-BH-A18Q	1692	1	1692
TCGA-BH-A18Q-11A	1	TCGA-BH-A18Q	1692	1	1692
TCGA-BH-A1EW-11B	1	TCGA-BH-A1EW	1694	1	1694
TCGA-BH-A1EW-01A	1	TCGA-BH-A1EW	1694	1	1694
TCGA-AR-A0TY-01A	1	TCGA-AR-A0TY	1699	1	1699
TCGA-A2-A3XW-01A	0	TCGA-A2-A3XW	1712	0	1712
TCGA-A2-A0CX-01A	0	TCGA-A2-A0CX	1728	0	1728
TCGA-D8-A13Y-01A	0	TCGA-D8-A13Y	1728	0	1728
TCGA-E2-A15R-01A	0	TCGA-E2-A15R	1732	0	1732
TCGA-AR-A2LR-01A	0	TCGA-AR-A2LR	1742	0	1742
TCGA-BH-A208-01A	1	TCGA-BH-A208	1759	1	1759
TCGA-BH-A208-11A	1	TCGA-BH-A208	1759	1	1759
TCGA-OL-A5D7-01A	0	TCGA-OL-A5D7	1780	0	1780
TCGA-B6-A0X7-01A	1	TCGA-B6-A0X7	1781	1	1781
TCGA-OL-A5DA-01A	0	TCGA-OL-A5DA	1783	0	1783
TCGA-AO-A03U-01B	1	TCGA-AO-A03U	1793	1	1793
TCGA-E2-A1IK-01A	0	TCGA-E2-A1IK	1800	0	1800
TCGA-GM-A2D9-01A	1	TCGA-GM-A2D9	1812	1	1812
TCGA-GM-A2D9-11A	1	TCGA-GM-A2D9	1812	1	1812
TCGA-BH-A0AV-01A	0	TCGA-BH-A0AV	1820	0	1820
TCGA-E2-A1L7-01A	0	TCGA-E2-A1L7	1836	0	1836
TCGA-E2-A1L7-11A	0	TCGA-E2-A1L7	1836	0	1836
TCGA-AO-A12F-01A	0	TCGA-AO-A12F	1842	0	1842
TCGA-A2-A1FX-01A	0	TCGA-A2-A1FX	1847	0	1847
TCGA-AC-A2FG-01A	0	TCGA-AC-A2FG	1853	0	1853
TCGA-AC-A2FG-11A	0	TCGA-AC-A2FG	1853	0	1853
TCGA-E2-A1IO-11A	0	TCGA-E2-A1IO	1855	0	1855
TCGA-E2-A1IO-01A	0	TCGA-E2-A1IO	1855	0	1855
TCGA-AR-A1AV-01A	0	TCGA-AR-A1AV	1864	0	1864
TCGA-AO-A03M-01B	0	TCGA-AO-A03M	1866	0	1866
TCGA-BH-A0BG-01A	0	TCGA-BH-A0BG	1871	0	1871
TCGA-A2-A0D3-01A	0	TCGA-A2-A0D3	1873	0	1873
TCGA-BH-A0BM-01A	0	TCGA-BH-A0BM	1876	0	1876
TCGA-BH-A0BM-11A	0	TCGA-BH-A0BM	1876	0	1876
TCGA-AO-A1KQ-01A	0	TCGA-AO-A1KQ	1882	0	1882
TCGA-A2-A0EW-01A	1	TCGA-A2-A0EW	1884	1	1884
TCGA-AO-A0JJ-01A	0	TCGA-AO-A0JJ	1887	0	1887
TCGA-HN-A2OB-01A	1	TCGA-HN-A2OB	1900	1	1900
TCGA-BH-A0AU-11A	0	TCGA-BH-A0AU	1914	0	1914
TCGA-BH-A0AU-01A	0	TCGA-BH-A0AU	1914	0	1914
TCGA-BH-A0AZ-01A	0	TCGA-BH-A0AZ	1919	0	1919
TCGA-BH-A0AZ-11A	0	TCGA-BH-A0AZ	1919	0	1919
TCGA-A2-A04V-01A	1	TCGA-A2-A04V	1920	1	1920
TCGA-A2-A0EY-01A	0	TCGA-A2-A0EY	1925	0	1925
TCGA-BH-A0EI-01A	0	TCGA-BH-A0EI	1926	0	1926
TCGA-BH-A1FJ-11B	1	TCGA-BH-A1FJ	1927	1	1927
TCGA-BH-A1FJ-01A	1	TCGA-BH-A1FJ	1927	1	1927
TCGA-BH-A0H3-01A	0	TCGA-BH-A0H3	1928	0	1928
TCGA-BH-A0H3-11A	0	TCGA-BH-A0H3	1928	0	1928
TCGA-AR-A2LM-01A	0	TCGA-AR-A2LM	1935	0	1935
TCGA-E2-A150-01A	0	TCGA-E2-A150	1935	0	1935
TCGA-PE-A5DD-01A	0	TCGA-PE-A5DD	1953	0	1953
TCGA-AR-A0TX-01A	0	TCGA-AR-A0TX	1972	0	1972
TCGA-AO-A0JF-01A	0	TCGA-AO-A0JF	1980	0	1980
TCGA-AR-A0U0-01A	0	TCGA-AR-A0U0	1988	0	1988
TCGA-B6-A0IE-01A	1	TCGA-B6-A0IE	1993	1	1993
TCGA-OL-A66J-01A	0	TCGA-OL-A66J	1996	0	1996
TCGA-BH-A18S-01A	1	TCGA-BH-A18S	2009	1	2009
TCGA-BH-A18S-11A	1	TCGA-BH-A18S	2009	1	2009
TCGA-AR-A2LL-01A	0	TCGA-AR-A2LL	2012	0	2012
TCGA-GM-A3XN-01A	0	TCGA-GM-A3XN	2019	0	2019
TCGA-AO-A03N-01B	0	TCGA-AO-A03N	2031	0	2031
TCGA-V7-A7HQ-01A	0	TCGA-V7-A7HQ	2033	0	2033
TCGA-BH-A0DG-01A	0	TCGA-BH-A0DG	2041	0	2041
TCGA-BH-A0DG-11A	0	TCGA-BH-A0DG	2041	0	2041
TCGA-A2-A0D0-01A	0	TCGA-A2-A0D0	2048	0	2048
TCGA-BH-A0DV-01A	0	TCGA-BH-A0DV	2064	0	2064
TCGA-BH-A0DV-11A	0	TCGA-BH-A0DV	2064	0	2064
TCGA-B6-A408-01A	0	TCGA-B6-A408	2072	0	2072
TCGA-B6-A0RG-01A	0	TCGA-B6-A0RG	2082	0	2082
TCGA-AO-A03R-01A	0	TCGA-AO-A03R	2091	0	2091
TCGA-B6-A0X5-01A	1	TCGA-B6-A0X5	2097	1	2097
TCGA-GM-A3XL-01A	0	TCGA-GM-A3XL	2108	0	2108
TCGA-E2-A14Y-11A	0	TCGA-E2-A14Y	2109	0	2109
TCGA-E2-A14Y-01A	0	TCGA-E2-A14Y	2109	0	2109
TCGA-AO-A03T-01A	0	TCGA-AO-A03T	2124	0	2124
TCGA-BH-A1EN-11A	1	TCGA-BH-A1EN	2127	1	2127
TCGA-BH-A1EN-01A	1	TCGA-BH-A1EN	2127	1	2127
TCGA-E2-A152-01A	0	TCGA-E2-A152	2128	0	2128
TCGA-B6-A402-01A	0	TCGA-B6-A402	2134	0	2134
TCGA-BH-A0B5-01A	0	TCGA-BH-A0B5	2136	0	2136
TCGA-BH-A0B5-11A	0	TCGA-BH-A0B5	2136	0	2136
TCGA-E2-A1IG-11A	0	TCGA-E2-A1IG	2140	0	2140
TCGA-E2-A1IG-01A	0	TCGA-E2-A1IG	2140	0	2140
TCGA-AO-A12E-01A	0	TCGA-AO-A12E	2142	0	2142
TCGA-GM-A2DF-01A	0	TCGA-GM-A2DF	2155	0	2155
TCGA-BH-A0DX-01A	0	TCGA-BH-A0DX	2156	0	2156
TCGA-AR-A255-01A	0	TCGA-AR-A255	2161	0	2161
TCGA-B6-A40C-01A	0	TCGA-B6-A40C	2164	0	2164
TCGA-AO-A0JM-01A	0	TCGA-AO-A0JM	2184	0	2184
TCGA-AO-A0JD-01A	0	TCGA-AO-A0JD	2190	0	2190
TCGA-A2-A0ES-01A	0	TCGA-A2-A0ES	2190	0	2190
TCGA-GM-A4E0-01A	0	TCGA-GM-A4E0	2191	0	2191
TCGA-BH-A1FN-01A	1	TCGA-BH-A1FN	2192	1	2192
TCGA-BH-A1FN-11A	1	TCGA-BH-A1FN	2192	1	2192
TCGA-GM-A2DH-01A	0	TCGA-GM-A2DH	2193	0	2193
TCGA-BH-A0BO-01A	0	TCGA-BH-A0BO	2197	0	2197
TCGA-BH-A0BO-11A	0	TCGA-BH-A0BO	2197	0	2197
TCGA-BH-A18M-11A	1	TCGA-BH-A18M	2207	1	2207
TCGA-BH-A18M-01A	1	TCGA-BH-A18M	2207	1	2207
TCGA-AC-A2BK-01A	0	TCGA-AC-A2BK	2222	0	2222
TCGA-AC-A2BK-11A	0	TCGA-AC-A2BK	2222	0	2222
TCGA-AR-A5QM-01A	0	TCGA-AR-A5QM	2231	0	2231
TCGA-B6-A1KI-01A	0	TCGA-B6-A1KI	2236	0	2236
TCGA-E2-A1L8-01A	0	TCGA-E2-A1L8	2240	0	2240
TCGA-A2-A04T-01A	0	TCGA-A2-A04T	2246	0	2246
TCGA-AC-A23G-01A	0	TCGA-AC-A23G	2248	0	2248
TCGA-AC-A23G-11A	0	TCGA-AC-A23G	2248	0	2248
TCGA-BH-A0BZ-11A	0	TCGA-BH-A0BZ	2255	0	2255
TCGA-BH-A0BZ-01A	0	TCGA-BH-A0BZ	2255	0	2255
TCGA-BH-A0BQ-11A	0	TCGA-BH-A0BQ	2255	0	2255
TCGA-BH-A0BQ-01A	0	TCGA-BH-A0BQ	2255	0	2255
TCGA-AC-A2FO-01A	0	TCGA-AC-A2FO	2255	0	2255
TCGA-AC-A2FO-11A	0	TCGA-AC-A2FO	2255	0	2255
TCGA-A2-A0ER-01A	0	TCGA-A2-A0ER	2263	0	2263
TCGA-BH-A1FE-06A	1	TCGA-BH-A1FE	2273	1	2273
TCGA-BH-A1FE-01A	1	TCGA-BH-A1FE	2273	1	2273
TCGA-BH-A1FE-11B	1	TCGA-BH-A1FE	2273	1	2273
TCGA-BH-A0BL-01A	0	TCGA-BH-A0BL	2278	0	2278
TCGA-BH-A0BL-11A	0	TCGA-BH-A0BL	2278	0	2278
TCGA-GM-A2DD-01A	0	TCGA-GM-A2DD	2282	0	2282
TCGA-AR-A0TV-01A	0	TCGA-AR-A0TV	2288	0	2288
TCGA-A2-A0CT-01A	0	TCGA-A2-A0CT	2289	0	2289
TCGA-BH-A0BP-01A	1	TCGA-BH-A0BP	2296	1	2296
TCGA-E2-A1LB-11A	0	TCGA-E2-A1LB	2306	0	2306
TCGA-E2-A1LB-01A	0	TCGA-E2-A1LB	2306	0	2306
TCGA-E2-A14T-01A	0	TCGA-E2-A14T	2311	0	2311
TCGA-E2-A1AZ-01A	0	TCGA-E2-A1AZ	2329	0	2329
TCGA-BH-A0BR-01A	0	TCGA-BH-A0BR	2330	0	2330
TCGA-AO-A0JE-01A	0	TCGA-AO-A0JE	2335	0	2335
TCGA-A2-A0CS-01A	1	TCGA-A2-A0CS	2348	1	2348
TCGA-B6-A0I1-01A	1	TCGA-B6-A0I1	2361	1	2361
TCGA-E2-A1IE-01A	0	TCGA-E2-A1IE	2362	0	2362
TCGA-BH-A0BT-01A	0	TCGA-BH-A0BT	2365	0	2365
TCGA-BH-A0BT-11A	0	TCGA-BH-A0BT	2365	0	2365
TCGA-BH-A0BW-01A	0	TCGA-BH-A0BW	2371	0	2371
TCGA-BH-A0BW-11A	0	TCGA-BH-A0BW	2371	0	2371
TCGA-BH-A0DE-01A	0	TCGA-BH-A0DE	2372	0	2372
TCGA-BH-A0DE-11A	0	TCGA-BH-A0DE	2372	0	2372
TCGA-AO-A12C-01A	0	TCGA-AO-A12C	2372	0	2372
TCGA-B6-A0RM-01A	1	TCGA-B6-A0RM	2373	1	2373
TCGA-BH-A0DL-01A	0	TCGA-BH-A0DL	2381	0	2381
TCGA-BH-A0DL-11A	0	TCGA-BH-A0DL	2381	0	2381
TCGA-A2-A04Q-01A	0	TCGA-A2-A04Q	2385	0	2385
TCGA-BH-A0DT-01A	0	TCGA-BH-A0DT	2403	0	2403
TCGA-BH-A0DT-11A	0	TCGA-BH-A0DT	2403	0	2403
TCGA-GM-A2DB-01A	0	TCGA-GM-A2DB	2406	0	2406
TCGA-B6-A0WV-01A	1	TCGA-B6-A0WV	2417	1	2417
TCGA-A2-A0EQ-01A	0	TCGA-A2-A0EQ	2426	0	2426
TCGA-A2-A0EO-01A	0	TCGA-A2-A0EO	2442	0	2442
TCGA-AO-A03L-01A	0	TCGA-AO-A03L	2442	0	2442
TCGA-B6-A0RL-01A	1	TCGA-B6-A0RL	2469	1	2469
TCGA-BH-A0B0-01A	0	TCGA-BH-A0B0	2477	0	2477
TCGA-BH-A0B6-01A	0	TCGA-BH-A0B6	2483	0	2483
TCGA-AO-A03O-01A	1	TCGA-AO-A03O	2483	1	2483
TCGA-BH-A0DD-01A	0	TCGA-BH-A0DD	2486	0	2486
TCGA-BH-A0DD-11A	0	TCGA-BH-A0DD	2486	0	2486
TCGA-BH-A0E9-01B	0	TCGA-BH-A0E9	2489	0	2489
TCGA-AO-A1KR-01A	0	TCGA-AO-A1KR	2513	0	2513
TCGA-AO-A12D-01A	0	TCGA-AO-A12D	2515	0	2515
TCGA-BH-A1ET-11B	1	TCGA-BH-A1ET	2520	1	2520
TCGA-BH-A1ET-01A	1	TCGA-BH-A1ET	2520	1	2520
TCGA-BH-A204-11A	1	TCGA-BH-A204	2534	1	2534
TCGA-BH-A204-01A	1	TCGA-BH-A204	2534	1	2534
TCGA-GM-A2DC-01A	0	TCGA-GM-A2DC	2535	0	2535
TCGA-E2-A106-01A	0	TCGA-E2-A106	2541	0	2541
TCGA-AR-A0U2-01A	1	TCGA-AR-A0U2	2551	1	2551
TCGA-AR-A0TS-01A	0	TCGA-AR-A0TS	2558	0	2558
TCGA-BH-A0B7-01A	0	TCGA-BH-A0B7	2559	0	2559
TCGA-BH-A0B7-11A	0	TCGA-BH-A0B7	2559	0	2559
TCGA-B6-A0IN-01A	1	TCGA-B6-A0IN	2573	1	2573
TCGA-GM-A2DI-01A	0	TCGA-GM-A2DI	2590	0	2590
TCGA-GM-A2DI-11A	0	TCGA-GM-A2DI	2590	0	2590
TCGA-B6-A401-01A	0	TCGA-B6-A401	2596	0	2596
TCGA-GM-A2DO-01A	0	TCGA-GM-A2DO	2596	0	2596
TCGA-AR-A254-01A	0	TCGA-AR-A254	2605	0	2605
TCGA-BH-A0BS-11A	0	TCGA-BH-A0BS	2612	0	2612
TCGA-BH-A0BS-01A	0	TCGA-BH-A0BS	2612	0	2612
TCGA-AR-A1AO-01A	0	TCGA-AR-A1AO	2618	0	2618
TCGA-AR-A1AX-01A	0	TCGA-AR-A1AX	2629	0	2629
TCGA-AR-A2LJ-01A	0	TCGA-AR-A2LJ	2632	0	2632
TCGA-AR-A1AW-01A	0	TCGA-AR-A1AW	2632	0	2632
TCGA-AC-A2FE-01A	1	TCGA-AC-A2FE	2636	1	2636
TCGA-AC-A2FE-11B	1	TCGA-AC-A2FE	2636	1	2636
TCGA-PE-A5DE-01A	0	TCGA-PE-A5DE	2645	0	2645
TCGA-GM-A2DK-01A	0	TCGA-GM-A2DK	2645	0	2645
TCGA-AC-A2FK-11A	0	TCGA-AC-A2FK	2650	0	2650
TCGA-AC-A2FK-01A	0	TCGA-AC-A2FK	2650	0	2650
TCGA-E2-A1B1-01A	0	TCGA-E2-A1B1	2653	0	2653
TCGA-A2-A04U-01A	0	TCGA-A2-A04U	2654	0	2654
TCGA-A2-A0CQ-01A	0	TCGA-A2-A0CQ	2695	0	2695
TCGA-AR-A250-01A	0	TCGA-AR-A250	2707	0	2707
TCGA-BH-A0C3-01A	0	TCGA-BH-A0C3	2709	0	2709
TCGA-BH-A0C3-11A	0	TCGA-BH-A0C3	2709	0	2709
TCGA-BH-A1F5-01A	1	TCGA-BH-A1F5	2712	1	2712
TCGA-BH-A1F5-11A	1	TCGA-BH-A1F5	2712	1	2712
TCGA-A2-A0EN-01A	0	TCGA-A2-A0EN	2718	0	2718
TCGA-B6-A0RT-01A	0	TCGA-B6-A0RT	2721	0	2721
TCGA-AC-A2FF-01A	0	TCGA-AC-A2FF	2759	0	2759
TCGA-AC-A2FF-11A	0	TCGA-AC-A2FF	2759	0	2759
TCGA-BH-A18K-01A	1	TCGA-BH-A18K	2763	1	2763
TCGA-BH-A18K-11A	1	TCGA-BH-A18K	2763	1	2763
TCGA-BH-A0C7-01B	0	TCGA-BH-A0C7	2767	0	2767
TCGA-BH-A0C7-01A	0	TCGA-BH-A0C7	2767	0	2767
TCGA-A2-A3XT-01A	0	TCGA-A2-A3XT	2770	0	2770
TCGA-BH-A1EO-11A	1	TCGA-BH-A1EO	2798	1	2798
TCGA-BH-A1EO-01A	1	TCGA-BH-A1EO	2798	1	2798
TCGA-A2-A0CP-01A	0	TCGA-A2-A0CP	2813	0	2813
TCGA-AR-A252-01A	0	TCGA-AR-A252	2838	0	2838
TCGA-AR-A256-01A	1	TCGA-AR-A256	2854	1	2854
TCGA-AR-A1AP-01A	0	TCGA-AR-A1AP	2856	0	2856
TCGA-AR-A24L-01A	1	TCGA-AR-A24L	2866	1	2866
TCGA-AR-A1AU-01A	0	TCGA-AR-A1AU	2868	0	2868
TCGA-AO-A03P-01A	1	TCGA-AO-A03P	2911	1	2911
TCGA-AR-A1AN-01A	0	TCGA-AR-A1AN	2920	0	2920
TCGA-AO-A1KP-01A	0	TCGA-AO-A1KP	2953	0	2953
TCGA-BH-A1F6-01A	1	TCGA-BH-A1F6	2965	1	2965
TCGA-BH-A1F6-11B	1	TCGA-BH-A1F6	2965	1	2965
TCGA-B6-A0WS-01A	1	TCGA-B6-A0WS	2965	1	2965
TCGA-AR-A1AL-01A	0	TCGA-AR-A1AL	2971	0	2971
TCGA-AR-A24S-01A	0	TCGA-AR-A24S	2976	0	2976
TCGA-AO-A12B-01A	0	TCGA-AO-A12B	2989	0	2989
TCGA-AR-A0TQ-01A	0	TCGA-AR-A0TQ	2991	0	2991
TCGA-AR-A1AM-01A	0	TCGA-AR-A1AM	2991	0	2991
TCGA-AR-A24Z-01A	0	TCGA-AR-A24Z	3001	0	3001
TCGA-AR-A24X-01A	0	TCGA-AR-A24X	3004	0	3004
TCGA-AR-A0TW-01A	0	TCGA-AR-A0TW	3009	0	3009
TCGA-A2-A0CV-01A	0	TCGA-A2-A0CV	3011	0	3011
TCGA-A2-A0CL-01A	0	TCGA-A2-A0CL	3015	0	3015
TCGA-A2-A0ST-01A	0	TCGA-A2-A0ST	3017	0	3017
TCGA-AR-A1AQ-01A	0	TCGA-AR-A1AQ	3021	0	3021
TCGA-AC-A2BM-11A	0	TCGA-AC-A2BM	3022	0	3022
TCGA-AC-A2BM-01A	0	TCGA-AC-A2BM	3022	0	3022
TCGA-AR-A251-01A	0	TCGA-AR-A251	3030	0	3030
TCGA-AR-A24N-01A	0	TCGA-AR-A24N	3035	0	3035
TCGA-B6-A0RS-01A	1	TCGA-B6-A0RS	3063	1	3063
TCGA-AR-A1AJ-01A	0	TCGA-AR-A1AJ	3072	0	3072
TCGA-B6-A1KF-01A	0	TCGA-B6-A1KF	3088	0	3088
TCGA-GM-A2DN-01A	0	TCGA-GM-A2DN	3091	0	3091
TCGA-A2-A0EM-01A	0	TCGA-A2-A0EM	3094	0	3094
TCGA-A2-A04W-01A	0	TCGA-A2-A04W	3102	0	3102
TCGA-AO-A12A-01A	0	TCGA-AO-A12A	3112	0	3112
TCGA-E2-A1LI-11A	0	TCGA-E2-A1LI	3121	0	3121
TCGA-E2-A1LI-01A	0	TCGA-E2-A1LI	3121	0	3121
TCGA-B6-A0RP-01A	1	TCGA-B6-A0RP	3126	1	3126
TCGA-AR-A24U-01A	0	TCGA-AR-A24U	3128	0	3128
TCGA-B6-A40B-01A	0	TCGA-B6-A40B	3152	0	3152
TCGA-AR-A1AK-01A	0	TCGA-AR-A1AK	3159	0	3159
TCGA-AR-A24Q-01A	0	TCGA-AR-A24Q	3172	0	3172
TCGA-AR-A24T-01A	0	TCGA-AR-A24T	3202	0	3202
TCGA-AR-A24V-01A	0	TCGA-AR-A24V	3203	0	3203
TCGA-A2-A25E-01A	0	TCGA-A2-A25E	3204	0	3204
TCGA-GM-A2DM-01A	0	TCGA-GM-A2DM	3226	0	3226
TCGA-E2-A1LH-11A	0	TCGA-E2-A1LH	3247	0	3247
TCGA-E2-A1LH-01A	0	TCGA-E2-A1LH	3247	0	3247
TCGA-AO-A128-01A	0	TCGA-AO-A128	3248	0	3248
TCGA-Z7-A8R6-01A	0	TCGA-Z7-A8R6	3256	0	3256
TCGA-AR-A0U4-01A	0	TCGA-AR-A0U4	3261	0	3261
TCGA-AR-A0TZ-01A	1	TCGA-AR-A0TZ	3262	1	3262
TCGA-A2-A25A-01A	0	TCGA-A2-A25A	3276	0	3276
TCGA-A2-A0CR-01A	0	TCGA-A2-A0CR	3283	0	3283
TCGA-A2-A0CW-01A	0	TCGA-A2-A0CW	3283	0	3283
TCGA-AO-A129-01A	0	TCGA-AO-A129	3286	0	3286
TCGA-Z7-A8R5-01A	0	TCGA-Z7-A8R5	3287	0	3287
TCGA-AR-A1AI-01A	0	TCGA-AR-A1AI	3296	0	3296
TCGA-AO-A126-01A	0	TCGA-AO-A126	3307	0	3307
TCGA-AR-A0TT-01A	0	TCGA-AR-A0TT	3316	0	3316
TCGA-GI-A2C9-01A	0	TCGA-GI-A2C9	3342	0	3342
TCGA-GI-A2C9-11A	0	TCGA-GI-A2C9	3342	0	3342
TCGA-GM-A3NW-01A	0	TCGA-GM-A3NW	3361	0	3361
TCGA-BH-A42U-01A	0	TCGA-BH-A42U	3364	0	3364
TCGA-A8-A08T-01A	1	TCGA-A8-A08T	3409	1	3409
TCGA-B6-A0IH-01A	1	TCGA-B6-A0IH	3418	1	3418
TCGA-AR-A24R-01A	0	TCGA-AR-A24R	3430	0	3430
TCGA-AO-A125-01A	0	TCGA-AO-A125	3456	0	3456
TCGA-B6-A0WY-01A	1	TCGA-B6-A0WY	3461	1	3461
TCGA-BH-A1ES-01A	1	TCGA-BH-A1ES	3462	1	3462
TCGA-BH-A1ES-11A	1	TCGA-BH-A1ES	3462	1	3462
TCGA-BH-A1ES-06A	1	TCGA-BH-A1ES	3462	1	3462
TCGA-BH-A1FC-11A	1	TCGA-BH-A1FC	3472	1	3472
TCGA-BH-A1FC-01A	1	TCGA-BH-A1FC	3472	1	3472
TCGA-A2-A0CO-01A	1	TCGA-A2-A0CO	3492	1	3492
TCGA-AO-A124-01A	0	TCGA-AO-A124	3506	0	3506
TCGA-GM-A2DL-01A	0	TCGA-GM-A2DL	3519	0	3519
TCGA-A2-A0EP-01A	0	TCGA-A2-A0EP	3603	0	3603
TCGA-AR-A24O-01A	0	TCGA-AR-A24O	3607	0	3607
TCGA-AR-A24M-01A	0	TCGA-AR-A24M	3660	0	3660
TCGA-BH-A1FB-11A	1	TCGA-BH-A1FB	3669	1	3669
TCGA-BH-A1FB-01A	1	TCGA-BH-A1FB	3669	1	3669
TCGA-A2-A04R-01A	0	TCGA-A2-A04R	3709	0	3709
TCGA-BH-A1FG-01A	1	TCGA-BH-A1FG	3736	1	3736
TCGA-BH-A1FG-11B	1	TCGA-BH-A1FG	3736	1	3736
TCGA-AR-A1AH-01A	0	TCGA-AR-A1AH	3807	0	3807
TCGA-B6-A0IM-01A	1	TCGA-B6-A0IM	3873	1	3873
TCGA-B6-A0IP-01A	1	TCGA-B6-A0IP	3926	1	3926
TCGA-B6-A0IB-01A	1	TCGA-B6-A0IB	3941	1	3941
TCGA-B6-A0X0-01A	1	TCGA-B6-A0X0	3945	1	3945
TCGA-AQ-A04L-01B	0	TCGA-AQ-A04L	3957	0	3957
TCGA-BH-A209-01A	1	TCGA-BH-A209	3959	1	3959
TCGA-BH-A209-11A	1	TCGA-BH-A209	3959	1	3959
TCGA-3C-AALI-01A	0	TCGA-3C-AALI	4005	0	4005
TCGA-3C-AAAU-01A	0	TCGA-3C-AAAU	4047	0	4047
TCGA-AR-A0U1-01A	0	TCGA-AR-A0U1	4052	0	4052
TCGA-AR-A0U3-01A	0	TCGA-AR-A0U3	4080	0	4080
TCGA-A2-A0CK-01A	0	TCGA-A2-A0CK	4159	0	4159
TCGA-B6-A1KN-01A	0	TCGA-B6-A1KN	4233	0	4233
TCGA-B6-A0RQ-01A	1	TCGA-B6-A0RQ	4267	1	4267
TCGA-AR-A0TP-01A	0	TCGA-AR-A0TP	4275	0	4275
TCGA-B6-A0IQ-01A	0	TCGA-B6-A0IQ	4285	0	4285
TCGA-A2-A04N-01A	0	TCGA-A2-A04N	4354	0	4354
TCGA-B6-A0I2-01A	0	TCGA-B6-A0I2	4361	0	4361
TCGA-B6-A0IG-01A	1	TCGA-B6-A0IG	4456	1	4456
TCGA-AR-A24H-01A	0	TCGA-AR-A24H	4894	0	4894
TCGA-B6-A0RO-01A	0	TCGA-B6-A0RO	4929	0	4929
TCGA-B6-A0IO-01A	0	TCGA-B6-A0IO	5042	0	5042
TCGA-AR-A2LE-01A	0	TCGA-AR-A2LE	5062	0	5062
TCGA-B6-A0RV-01A	0	TCGA-B6-A0RV	5156	0	5156
TCGA-B6-A2IU-01A	0	TCGA-B6-A2IU	5176	0	5176
TCGA-B6-A0WT-01A	0	TCGA-B6-A0WT	5739	0	5739
TCGA-B6-A0WZ-01A	0	TCGA-B6-A0WZ	6292	0	6292
TCGA-B6-A0RH-01A	1	TCGA-B6-A0RH	6456	1	6456
TCGA-GM-A2DA-01A	1	TCGA-GM-A2DA	6593	1	6593
TCGA-B6-A0IJ-01A	0	TCGA-B6-A0IJ	7106	0	7106
TCGA-B6-A0RI-01A	0	TCGA-B6-A0RI	7126	0	7126
TCGA-B6-A0X1-01A	1	TCGA-B6-A0X1	7455	1	7455
TCGA-B6-A0RE-01A	0	TCGA-B6-A0RE	7777	0	7777
TCGA-B6-A0RN-01A	0	TCGA-B6-A0RN	8008	0	8008
TCGA-B6-A0IA-01A	0	TCGA-B6-A0IA	8391	0	8391
TCGA-B6-A0I5-01A	0	TCGA-B6-A0I5	8556	0	8556
TCGA-B6-A0RU-01A	0	TCGA-B6-A0RU	8605	0	8605
